# Supplementary material for: Divergence patterns of genic copy number variation in natural populations of the house mouse (Mus musculus domesticus) reveal three conserved genes with major population-specific expansions
Source: Genome Res. 2015 Aug;25(8):1114–24. doi: 10.1101/gr.187187.114 (PMC4509996; doi:10.1101/gr.187187.114)
Supplement: Supplemental Material [file supp_gr.187187.114_Supp_Table_S4.xlsx]

## Sheet: all CNV genes
	Table S4. Estimated gene copy number per individual and CNV gene
		FRA								IRA								GER								HEL
Coordinates (mm9)	Gene Symbol	14	15B	16B	18B	B2C	C1_2	E1_B	F1_B	AH15	AH23	JR11	JR15	JR2-F1C	JR5-F1C	JR7-F1C	JR8-F1A	TP81B	TP7-10F1A2	TP51D	TP4a	TP3-92	TP17-2	TP12	TP1	HG_06	HG_08	HG_13	average
chr17:39979941-39985774	Rn45s	157.317	181.925	216.821	175.17	256.475	131.105	188.951	188.416	218.587	232.942	165.913	187.795	155.595	238.63	293.011	169.673	130.356	235.747	208.213	363.069	211.947	213.848	209.122	230.699	265.181	173.159	222.595	208.232
chr11:3031852-3093466	Sfi1	79.7328	69.1441	72.8887	69.121	67.3597	64.6515	75.0875	72.8239	62.5728	68.7824	68.9419	65.695	80.5312	76.0149	70.5689	74.8072	58.3623	41.3509	50.0755	46.0759	42.3625	48.3025	43.7034	40.1367	51.2622	52.7574	50.5541	61.6173
chr7:67006618-67006708	Snord116	40.4253	54.4886	51.2412	23.9449	32.152	23.2989	42.3329	43.0463	35.9854	23.6101	19.9652	32.1705	33.4182	35.288	20.4203	37.5937	34.5451	33.9051	32.9625	54.3557	50.0985	52.2974	64.8437	53.457	21.3846	22.3494	26.1556	36.8791
chr11:3024029-3031945	Pisd-ps3	44.7938	38.2344	40.8973	37.3348	36.5153	36.1649	41.1233	41.1349	41.5656	37.2508	41.0128	37.6011	51.3938	44.8562	44.901	44.0709	33.5207	24.5464	29.3435	27.8972	25.8242	27.8668	25.5862	23.6566	27.0317	28.8385	28.3957	35.6059
chr11:3024023-3031947	Pisd-ps1	44.7776	38.219	40.884	37.3228	36.4984	36.1534	41.1069	41.1194	41.5529	37.2425	41.0005	37.5852	51.3745	44.8391	44.8856	44.0526	33.5078	24.5375	29.3314	27.8875	25.815	27.8572	25.5759	23.6474	27.0188	28.8245	28.3825	35.5926
chr10:57693398-57695423	Dux	31.6513	27.8596	37.6082	30.0005	23.266	29.2149	20.8652	33.4711	22.4093	33.5584	28.2624	36.5076	30.9048	30.6406	29.9982	38.7301	33.3609	35.6588	35.1569	30.4261	35.7208	28.8765	31.0607	29.2816	28.9514	27.8153	28.5001	30.7318
chr8:19981359-20020392	2610005L07Rik	26.6999	14.9379	18.6149	16.0528	22.8154	26.6189	21.3751	17.3337	26.0811	45.5101	35.6421	31.9324	23.1413	43.3582	45.3857	35.3436	14.7838	34.9701	22.6971	37.3292	29.2385	28.9781	21.4659	24.7541	43.0943	42.4846	30.1843	28.9194
chr8:19991155-20020278	6820431F20Rik	25.5226	14.5978	18.0701	16.0546	22.1959	25.7537	21.0252	16.9402	25.14	45.9136	34.3607	29.8659	22.4422	42.1464	44.1026	35.1277	15.0839	34.6597	21.807	36.98	27.8173	27.8192	21.0104	24.0219	40.5627	39.637	29.0103	28.0618
chrX:166412974-166416849	G530011O06Rik	6.90673	13.5942	22.1377	20.7838	30.4919	18.208	26.8029	75.554	20.3541	17.3172	29.8061	12.7599	12.4448	14.1344	21.9445	14.5821	82.1028	24.6178	20.099	22.9106	21.2443	15.1209	2.80205	51.6075	33.9203	22.2071	37.3862	25.6237
chr8:19933241-19958780	Gm15319	20.998	12.052	14.5252	12.6565	18.1352	19.3813	17.0651	13.7595	21.0904	36.2705	29.0648	24.6954	19.2847	37.2413	36.3041	30.0146	13.315	28.973	18.1728	31.171	22.5609	22.703	16.4211	19.8067	34.5985	35.0321	24.5047	23.3258
chr8:19863863-19893010	6820431F20Rik	20.7994	11.7678	14.983	13.3927	18.2685	21.0148	17.0056	13.5593	21.0407	37.2706	27.9588	24.1534	18.1131	35.2173	36.5547	28.845	13.091	27.7857	17.5136	29.4301	21.7973	22.0895	16.4168	19.0275	32.389	32.3158	23.6784	22.7955
chr6:47702750-47702924	Rn4.5s	24.0756	19.4115	20.0451	19.4519	28.247	15.7408	18.5827	18.46	24.2084	22.8907	20.3134	26.4287	16.4727	25.0347	23.7346	12.9267	15.9172	20.7802	13.7279	16.35	14.28	18.0157	14.2996	17.1319	11.3447	10.8204	11.2456	18.5162
chr2:77733709-77784410	Cwc22	1.88484	1.93342	2.01161	7.47923	12.6288	2.08076	12.9755	1.95579	2.47191	1.95995	1.99689	2.53497	2.02592	33.0744	2.93658	2.04286	1.94337	27.0226	2.96956	83.4386	79.4405	46.8861	32.1043	1.98233	21.5495	12.751	27.7847	15.921
chr7:67011675-67011765	Snord116	12.7019	16.6443	15.9862	12.838	13.0589	10.826	13.335	13.5032	12.062	9.64351	11.2844	14.6618	12.5981	18.092	12.6275	20.6733	18.825	19.255	21.8226	18.0912	15.601	19.1264	17.5508	18.3219	8.2648	8.94793	10.2213	14.6876
chr1:90159687-90165983	6430706D22Rik	9.154	16.3227	9.83918	12.0607	5.43534	12.2645	9.47995	7.47068	16.6357	13.2893	15.0127	11.8395	34.2045	20.2961	18.6137	27.7224	16.7277	10.4507	5.95505	17.4276	6.65782	13.576	8.4104	12.6592	15.4843	20.0732	14.7995	14.1431
chr7:67014217-67014307	Snord116	9.02612	14.0354	12.2107	10.3605	19.5893	9.96906	9.74833	10.6624	8.60354	9.62437	9.39635	13.0333	13.5671	14.9544	11.739	16.7549	16.8164	16.2146	16.9375	14.568	13.178	17.4758	16.0104	14.8003	16.7695	17.2667	19.7145	13.8158
chr1:90155430-90174154	Hjurp	8.63211	15.4886	9.58836	11.8591	5.2144	12.1103	9.10714	6.93465	15.408	11.9635	13.9488	10.8196	31.8208	18.0043	17.5645	25.0692	15.4816	9.78365	5.42708	15.8908	6.04331	12.3501	7.69317	11.5835	13.9763	18.3683	13.409	13.0941
chr1:90108533-90116577	Ugt1a1	14.7413	7.88602	6.03215	6.85453	6.20127	7.77735	6.01945	22.6206	10.8613	24.8687	7.05406	12.2539	8.97541	37.5682	17.6194	30.2738	10.9773	12.3415	4.1893	22.1357	8.15968	16.3143	8.07078	14.1272	10.3845	7.68524	9.36797	13.0134
chr1:90161402-90174132	A730008H23Rik	8.68284	15.5553	9.54029	11.9265	5.18175	12.1253	9.1026	6.91366	15.4213	11.5923	13.4933	10.5726	31.6278	18.0475	17.4004	24.7007	15.3569	9.57119	5.34026	15.7536	5.90034	12.4297	7.30161	11.5295	13.6478	18.028	13.0196	12.9542
chr1:85084713-85106428	A530032D15Rik	15.7286	9.94155	14.9141	7.27683	12.1131	6.81813	11.1283	13.0064	10.6545	12.2084	11.1337	10.1209	10.7405	15.5276	11.4662	12.5196	10.369	14.2148	14.955	22.5745	12.2304	16.8952	22.2995	17.5967	10.7704	10.8412	11.0559	12.9297
chr5:26425207-26431854	5031410I06Rik	13.7815	15.0318	12.3837	10.2211	11.6758	14.8772	12.9642	14.0213	10.5166	13.4949	7.23728	12.3697	14.1568	16.4829	16.5048	18.1565	14.3425	12.6545	7.26241	9.98362	11.1917	9.12248	8.89756	13.3904	14.1174	15.0603	15.1109	12.7781
chr7:67004101-67004191	Snord116	8.11821	10.7133	9.63117	6.63948	22.824	7.31182	10.3402	9.29695	10.4415	9.59963	10.278	12.8974	12.1146	11.019	10.5248	13.4654	12.2944	12.3405	12.8883	15.2493	12.066	14.8556	12.8166	13.0952	19.2694	20.4191	20.1116	12.6156
chr5:15158105-15162877	4930572O03Rik	11.8579	10.8439	10.3402	11.5416	10.7096	9.83867	9.47405	3.49854	12.6138	15.6177	12.6203	11.4616	17.4016	8.7311	17.6988	23.0727	19.3376	9.11602	6.55436	12.8336	11.4903	13.2421	12.5618	11.9351	13.0125	13.7806	13.8567	12.409
chr1:90123594-90158864	Heatr7b1	8.68775	12.5474	8.30387	9.64995	5.05657	9.94115	8.1316	8.16092	12.8175	12.1233	12.5233	11.2494	24.7537	18.0156	15.1626	21.881	12.8717	9.61957	5.24136	13.9832	7.01913	9.90646	8.15284	10.4899	12.6103	15.4669	12.4091	11.7324
chr13:120277666-120284312	Gm7120	6.45636	7.12078	7.06861	1.89501	2.12485	1.93885	2.75131	19.8373	3.72729	30.0598	13.1606	23.0405	8.98691	9.71101	33.367	12.0855	1.86481	16.4673	20.8005	25.3729	5.60794	8.42546	10.3401	3.82458	11.6137	16.5889	11.8957	11.7087
chr5:14910123-14914889	Gm9758	9.52025	9.74912	9.33674	10.9367	10.506	9.42186	9.23303	3.44074	11.1487	16.0224	12.3211	10.8547	17.8093	9.35666	16.6984	23.0376	18.3169	7.81618	5.09114	10.7161	9.66251	10.5865	10.5919	10.0359	12.062	12.5488	12.5056	11.4565
chr6:47694056-47694230	Rn4.5s	12.2679	10.2011	9.28101	12.0072	16.6746	7.91748	8.16774	11.1305	13.2005	12.4632	15.5472	10.8935	9.06808	13.6237	15.9739	7.91336	9.33024	12.9763	12.3306	9.06895	8.47887	10.1442	8.28419	10.1293	11.7323	9.69899	11.2265	11.1012
chr13:120276845-120284312	Gm7120	5.92659	6.70696	6.59584	1.87346	2.04912	1.8353	2.63114	18.2344	3.5336	27.4258	12.0201	21.3656	8.30852	8.91678	30.1698	11.0581	1.7607	15.188	18.9829	23.2509	5.24244	7.7433	9.60082	3.58926	10.7532	15.2445	10.987	10.7776
chr5:15186527-15220414	Speer7-ps1	9.06334	10.0932	9.09901	9.88715	9.77316	8.21318	9.00406	4.39968	8.99932	12.6275	10.5699	8.52485	13.7216	6.75195	13.5036	18.3718	16.2547	8.32025	6.01779	11.0156	9.60336	11.0546	11.4213	11.0378	11.0339	11.0096	10.8177	10.3774
chr17:3064317-3084183	Pisd-ps2	12.2987	10.7833	11.4787	10.8291	10.5782	10.3524	11.4039	11.2414	11.969	10.2352	10.9089	10.5125	12.8793	12.0433	12.5515	13.2417	9.58941	7.09183	8.2401	7.86119	7.44096	8.00599	7.51761	7.15505	8.33284	8.64463	8.54583	10.0642
chr8:19729575-19753602	4930467E23Rik	9.8269	5.9906	6.89651	6.98007	8.16179	9.02772	7.44863	5.71079	8.56776	15.396	11.6579	9.56539	8.04862	15.4565	14.8047	11.6432	7.427	11.4953	7.39187	12.1698	8.83787	10.516	8.35901	8.746	14.3126	14.5367	11.7568	10.0271
chr8:19729575-19753527	LOC100861668	9.79335	5.97164	6.88088	6.96287	8.13252	8.9994	7.42045	5.68659	8.52969	15.3227	11.6069	9.52383	8.01817	15.3968	14.7371	11.5895	7.40566	11.4463	7.36228	12.1153	8.80397	10.4865	8.33651	8.71085	14.2754	14.4968	11.7249	9.99025
chr1:85242918-85267141	C130026I21Rik	7.99416	7.67226	9.87737	3.93069	7.45149	5.53324	7.07017	11.5333	12.4654	10.9692	14.2505	10.3437	9.16428	17.0284	10.9313	11.7373	9.19942	10.8389	8.74702	13.9193	8.73492	11.0107	12.6104	12.1342	8.0335	8.19569	8.14463	9.98228
chr5:15124916-15129682	Speer4d	8.9588	7.49985	8.50239	9.15866	9.68058	8.80895	7.89187	2.83026	9.54894	12.0639	9.15176	8.03166	12.4384	7.05442	12.4347	17.3511	15.5501	7.65417	5.68125	10.1543	8.59223	10.0442	10.2142	10.2735	9.85513	10.5233	10.1905	9.63478
chr5:14933630-14938475	Speer4e	7.21209	8.11123	7.55553	8.39235	7.899	7.32723	7.53587	2.70192	9.36894	11.6307	11.6557	9.09635	16.1691	7.79078	14.3762	19.2499	14.1305	5.62819	3.70723	8.34193	7.67588	8.32017	7.8299	7.70769	10.6967	10.5894	10.7996	9.31482
chr1:87473474-87500466	Sp110	13.0895	7.62586	11.9929	9.66416	12.2502	3.81681	11.3139	5.49298	6.93777	7.85787	6.58047	6.74717	6.62548	9.37797	7.13124	7.85126	5.34624	6.09065	6.2723	14.2074	6.31487	5.80045	25.7948	10.1819	5.9725	6.04354	6.05268	8.60862
chr1:87497277-87541611	Sp140	12.3117	6.92573	10.9896	7.64552	10.4242	4.17991	9.69976	6.18065	6.9288	8.11831	6.69299	6.71346	7.09146	9.71451	7.78244	8.4181	5.89524	6.701	7.16884	13.7736	7.25404	6.60229	21.1046	10.3087	6.57364	6.66278	6.76387	8.46762
chrX:3907055-3908959	Mgclh	6.98294	4.86439	8.3754	7.58755	7.75698	10.2569	8.68927	8.3945	8.3471	11.68	19.1939	8.53365	15.5987	11.6449	23.2019	9.21285	4.02189	2.47949	6.45528	4.09243	2.88213	4.33637	3.88771	3.01099	7.45615	3.93939	8.28805	8.19151
chrX:3907038-3908959	Mgclh	6.96793	4.86534	8.34907	7.5616	7.73672	10.2247	8.66593	8.37632	8.32941	11.6679	19.1759	8.52065	15.5816	11.6071	23.1474	9.19295	4.01457	2.48628	6.44704	4.09709	2.88509	4.339	3.88617	3.00774	7.43537	3.93052	8.27139	8.1767
chrX:3907010-3908970	Gm14347	6.93429	4.86343	8.29965	7.51882	7.71089	10.1605	8.62573	8.33634	8.30446	11.6547	19.1701	8.5032	15.5436	11.5423	23.0814	9.16381	3.99474	2.49175	6.4279	4.09778	2.88326	4.33224	3.8773	2.99379	7.38646	3.90875	8.22357	8.14929
chr2:177282930-177297016	Gm14403	6.05622	4.12926	1.35911	2.60248	7.64537	5.54144	4.1111	7.71357	15.5973	15.8362	8.58046	8.93258	12.3532	16.8911	8.29115	16.2613	6.47706	12.2668	9.43331	7.4089	4.43321	6.51182	6.39249	5.26034	6.04788	6.16699	4.21555	8.01912
chr1:87473474-87495385	Sp110	12.8892	7.59147	11.7771	9.97405	12.1732	3.29929	11.3505	4.83607	6.33914	6.60669	6.24066	6.21645	5.92066	8.28409	5.79547	6.78318	4.77366	5.25846	5.30016	13.3588	5.44506	4.98107	26.3423	9.31245	5.0879	5.26803	5.19262	8.01473
chr6:136277556-136280001	Gm8994	8.5829	5.48902	8.62492	10.1696	15.4466	3.13808	14.5468	11.4324	8.70118	5.8368	3.65992	3.73861	8.30652	12.7335	4.66006	9.24622	5.7256	8.87104	4.03044	6.42323	5.02805	3.36106	7.23741	14.1145	8.42106	7.75215	8.04309	7.90077
chr5:15028949-15033007	Gm17019	5.28502	5.10534	5.03855	5.59877	5.18968	4.75211	4.69427	2.42622	7.81953	8.78913	9.76349	6.86777	16.4606	7.4819	11.4294	17.5769	15.8825	4.19101	2.86851	5.87527	5.21432	5.64986	6.30047	5.54825	12.1148	12.3792	12.493	7.88133
chr6:47630883-47631057	Rn4.5s	7.78392	7.28856	6.66155	6.66937	3.50814	7.0504	6.82252	4.98469	10.6174	7.34913	8.4935	8.4175	4.0076	12.0406	8.98695	9.5322	8.58058	6.82362	7.05558	7.80864	10.7965	7.53908	10.9271	6.59678	7.92721	7.35644	8.30295	7.77513
chr6:47622224-47622398	Rn4.5s	8.97531	7.71072	8.30511	7.68134	4.48955	8.16567	7.3521	4.97668	9.72191	6.74208	8.30538	8.51506	4.58373	9.57705	7.39899	8.67947	8.94273	7.66079	8.05811	8.13107	11.3064	9.74856	10.2987	6.35707	4.20674	6.50889	7.11805	7.7599
chr6:47635201-47635375	Rn4.5s	6.3845	6.29157	6.83162	7.90477	6.8679	8.17289	5.93614	4.92973	7.92497	6.87437	8.89292	8.17639	3.48364	9.14008	6.98568	9.29547	9.13802	6.46492	8.21631	6.28923	9.11953	9.14794	9.21734	4.99148	7.86599	9.56552	10.6404	7.58331
chr4:145260599-145294340	Gm13242	9.02564	8.53076	9.32369	10.9337	10.5822	11.0552	11.9534	9.79907	5.28122	4.01009	2.88809	2.91211	2.15157	7.34543	3.11739	6.93666	8.00814	7.79509	9.25509	10.4835	5.11465	11.7057	6.42744	10.9177	5.81671	6.84306	5.78832	7.55562
chr4:146125090-146166150	Zfp600	9.60216	7.08087	6.51845	10.2488	9.22534	10.0948	9.23709	8.06301	6.40414	5.48061	3.73684	4.08242	2.49729	9.57193	3.97326	9.56602	6.70326	6.35921	9.77003	10.2095	3.23162	10.5575	5.92383	13.4702	6.96938	7.21587	7.00344	7.511
chr6:47626562-47626736	Rn4.5s	6.01057	4.65649	7.00928	8.0652	4.15397	7.10774	5.30033	3.49308	7.09446	7.20136	8.48893	7.61654	3.65845	12.9677	9.86254	10.2726	10.4805	8.36148	9.42647	6.90358	10.0089	7.87542	9.13351	5.57971	6.38801	7.2321	7.72384	7.48418
chr6:47604919-47605093	Rn4.5s	7.38005	5.25897	7.20948	6.35002	3.93243	7.65502	7.01272	3.83847	9.75781	7.46336	9.65676	7.71942	4.00954	9.47465	7.83061	7.51136	7.95249	7.26661	7.08864	6.86031	10.3081	7.91719	10.775	5.79615	8.76951	7.88951	8.02828	7.43379
chr4:146124224-146166150	Zfp600	9.50073	6.99497	6.43992	10.1342	9.12315	9.97654	9.14365	7.9721	6.31727	5.41876	3.68608	4.01937	2.48521	9.43556	3.91583	9.45261	6.61443	6.29911	9.64163	10.0923	3.21467	10.4215	5.86817	13.3411	6.89421	7.12725	6.9282	7.42439
chr6:47613580-47613754	Rn4.5s	6.69434	4.63319	5.78576	6.63182	4.90373	6.9184	6.43873	3.83164	7.2341	8.39262	9.21265	8.02572	4.57954	10.9975	9.31495	8.2111	8.87444	7.45031	7.37805	6.32414	8.48515	9.48851	11.4163	4.95381	8.24944	6.99042	8.45985	7.40282
chr6:47617916-47618090	Rn4.5s	6.78662	6.09842	5.41905	7.375	4.12627	7.94931	6.15813	3.19752	8.68561	9.40581	8.08404	6.3998	4.58945	9.98568	7.59265	8.25151	8.25312	5.97002	8.15287	7.42926	10.1685	9.87743	9.37604	5.728	6.00179	6.49786	6.86258	7.20083
chr4:146927385-146959310	Gm13154	6.71433	6.47423	7.40187	9.67632	8.42479	9.22646	10.6036	7.69344	5.98059	5.52744	4.10559	4.43031	2.50743	9.77918	4.23236	9.30062	6.66446	7.88378	8.68598	10.1456	4.22553	10.4613	7.45175	11.6359	4.23477	5.43767	4.2831	7.15513
chr7:67021820-67021910	Snord116	6.39065	9.00025	9.70039	7.8888	9.86174	6.9145	7.77137	7.85638	5.36088	5.07942	7.2251	7.01938	3.972	6.12269	4.61862	6.10422	5.64969	7.34014	7.16061	6.43328	8.22376	8.16273	9.6682	7.62722	6.59327	6.91101	7.75531	7.12636
chr4:145728598-145749009	Gm13251	8.36849	3.66182	4.16279	8.86729	7.85452	8.47442	6.93438	6.72537	9.10575	9.17899	6.42854	4.67893	2.19559	11.9887	5.97297	9.02494	6.57356	5.83605	11.3553	9.50364	3.17951	11.3945	4.734	9.30848	5.26989	4.90288	5.17324	7.06869
chr2:177249446-177263899	Gm14420	3.6935	4.14372	0.876357	2.25252	6.34682	4.61677	3.93868	5.71496	12.4557	11.4956	9.18754	7.78187	8.58611	12.5397	8.15274	12.6622	5.34855	14.0643	8.34636	8.67706	7.9652	5.41452	4.7626	5.08657	5.00072	5.02333	3.60151	6.95317
chr6:47609240-47609414	Rn4.5s	5.72489	6.31888	6.87762	7.47349	3.81491	7.848	7.32313	3.433	6.23462	5.21934	6.8176	7.31171	3.04645	7.82683	6.04803	7.67136	9.39612	6.97027	8.38586	5.73405	8.33139	7.68171	10.1011	4.09743	8.66322	8.25741	8.374	6.8512
chr10:99813724-99824881	Gm4302	7.90555	10.003	7.05895	6.638	7.81416	7.95491	7.20912	6.92976	3.01358	7.07854	5.70556	7.30559	7.51992	4.38218	6.07687	6.54242	6.23208	8.19601	6.18335	7.02638	6.26678	9.28827	8.45653	7.91073	4.00802	4.13919	3.96835	6.69681
chr4:88446223-88446772	Gm13285	7.67799	2.47368	9.21433	2.49248	6.65209	6.51023	8.64189	3.80718	8.10198	5.64113	4.5879	9.09353	5.94037	2.72327	6.12039	13.3153	9.84599	3.31969	8.6436	5.78979	11.5015	6.03777	2.25114	2.77365	7.05044	8.05226	8.03783	6.52953
chr10:99803471-99804396	Gm4303	7.21711	9.80626	6.73344	6.17566	7.41564	7.35896	5.71429	6.41011	2.49447	7.9508	6.32598	7.12119	7.37363	3.91835	7.26771	6.35547	5.66421	6.75596	6.58475	6.46483	5.92676	8.41754	7.4828	6.91942	3.45974	4.4325	3.81338	6.35411
chr10:99823971-99824881	Gm4303	7.52151	10.136	7.88756	5.93598	5.9955	7.29588	7.09015	6.58073	3.11538	6.1992	5.08326	7.58378	6.95077	4.39482	5.26323	5.39876	5.98994	7.80352	5.88127	5.54901	5.83889	8.58673	7.9157	7.39172	4.75193	4.2898	4.52473	6.33169
chr10:21993279-22008654	H60b	10.0244	8.82662	9.02059	9.99811	4.81072	4.1943	2.375	6.82651	2.75735	7.83099	3.12198	3.80585	4.64684	5.32714	3.11903	7.56808	8.62856	6.52073	3.10909	7.32528	2.17775	4.30618	9.57214	6.73359	10.8578	5.59612	10.5597	6.28298
chr17:37114645-37118182	2410137M14Rik	2.01145	2.02481	2.01391	1.99319	25.3898	32.3457	2.1238	24.0986	1.98658	1.97529	2.19794	2.14051	2.14056	1.87037	2.14164	2.17511	2.12208	2.05656	39.1896	2.10765	2.13906	1.99255	3.07634	2.12711	1.88132	2.03002	1.95771	6.27071
chr10:99808603-99814636	Gm4302	7.3893	9.10571	6.86308	5.89655	7.15467	7.5029	6.77598	6.42847	2.78148	6.50981	5.0441	6.30548	6.51384	4.06811	5.79415	6.46347	5.52822	7.4987	5.74099	6.28391	5.89225	8.31768	8.14723	7.28958	3.81067	3.88297	3.84603	6.17909
chr10:99813726-99814636	Gm4303	7.09123	9.34392	7.3284	5.82086	6.08124	7.91938	6.87781	6.58851	2.58436	6.12337	5.46609	7.27676	6.31199	3.994	5.82558	5.81881	5.38717	7.96693	5.96595	6.14743	6.07263	8.40118	7.88102	7.09933	3.71482	3.72027	3.60397	6.16344
chr4:88425753-88426302	Gm13285	7.40462	3.1078	7.95141	1.70859	8.35508	6.63191	7.38651	5.08222	10.5599	3.53041	5.19575	11.7527	4.19043	2.80855	5.5465	19.0042	7.90135	4.14766	6.84492	4.75773	9.16751	4.55928	1.67922	1.87261	5.42395	4.29621	4.52107	6.12548
chr10:99808605-99809515	Gm4303	7.94385	9.25508	7.38048	5.82701	6.73134	7.14149	6.71413	6.63522	2.60906	6.07131	4.95288	6.905	6.18188	4.00849	5.44422	5.88955	5.2284	7.33366	5.90342	6.61232	5.59138	8.21987	8.31207	7.22041	3.33618	3.66407	3.59786	6.10039
chr4:146034924-146036119	Gm13034	8.78263	9.12304	5.48035	11.6037	7.88101	8.73889	7.70201	6.62588	2.34739	2.06447	0.258265	0.601937	0.888541	2.55452	0.515867	10.2594	6.73375	5.01442	6.14694	8.44435	2.61567	8.69871	4.27365	12.4641	5.79022	5.94517	5.67749	5.82342
chr7:48539696-48545553	Gm5592	5.57296	5.72986	8.27324	5.755	6.10238	6.14598	5.97877	6.09289	5.58588	5.49987	6.42003	6.59734	7.75562	6.87217	9.20307	4.51932	6.21872	5.24798	5.93207	6.28479	6.11206	4.21215	5.62723	3.58461	4.46698	3.69942	3.67255	5.82085
chrX:166317553-166428729	Mid1	2.66863	3.64869	4.82761	5.49824	5.98402	4.39202	5.24221	14.4195	5.28109	3.72633	6.11906	3.52122	3.14325	4.19241	4.71824	3.29913	14.8921	4.83545	4.0865	4.98472	4.4822	3.93233	1.34318	9.42961	7.61997	7.01147	11.0657	5.71722
chr4:146986044-147016617	2610305D13Rik	6.05274	5.7296	4.82513	7.81549	7.02657	6.96616	7.1504	5.50109	4.81704	4.46259	2.75268	2.7695	1.74268	6.37298	3.03688	7.12887	6.23898	5.86299	7.57849	7.99542	2.85776	8.38261	4.71979	9.10572	5.43273	5.64618	5.50993	5.68448
chr12:89099797-89104138	Gm1995	6.67959	6.98485	6.65613	6.47815	3.20517	7.98515	5.6786	5.98913	5.38957	7.15306	5.76284	7.46732	6.0504	4.90661	5.86817	5.54015	5.23607	5.11182	6.07916	5.03879	5.22878	4.3706	5.17959	5.3773	4.68685	4.2103	4.10555	5.64517
chr7:46511993-46519904	LOC100861861	4.24339	3.4538	2.82073	3.57659	6.99279	3.54883	7.02002	4.52019	3.73456	0.986946	10.4373	3.23143	1.86044	3.97699	12.1878	3.40726	9.45982	9.71774	8.37542	6.12567	4.58618	5.60978	11.6964	4.86508	4.66914	4.62001	4.73692	5.57264
chr4:88449157-88449706	Gm13285	7.87296	2.08435	8.53677	2.16351	6.45121	4.97297	7.35784	3.6066	6.93427	4.23192	3.17144	8.28654	4.77782	2.52157	5.0196	10.1721	7.41926	3.41586	7.17924	5.46303	9.73007	5.28033	1.58181	1.87047	6.69956	6.50388	5.70216	5.51878
chr12:89509079-89512941	Gm5662	6.3338	6.17094	6.04641	5.20409	1.94726	7.49574	4.88054	5.71987	5.18465	7.72468	4.02316	7.78434	4.90389	5.44233	6.44147	5.65319	5.49991	5.64332	6.09132	5.46499	5.43941	3.901	5.77908	5.28944	4.34597	4.40973	4.40674	5.45286
chr3:93600319-93601432	Tdpoz4	4.27238	4.07773	4.02336	4.11441	5.85247	3.28242	4.20914	4.80987	6.96921	5.71403	6.5443	8.67127	3.93145	6.91131	6.91799	4.41942	6.16198	5.20011	4.32916	9.49506	3.41879	6.92671	4.83637	4.09611	5.22538	6.69692	5.64367	5.43522
chr1:85196185-85210337	Gm7609	6.29615	5.33636	6.66653	4.09943	5.71139	3.19807	4.91438	6.66699	4.64542	4.35441	5.5635	3.91378	3.33208	6.36215	4.10816	4.50176	4.42378	6.32045	5.90429	9.21602	4.32255	6.6715	9.53093	7.45289	4.16873	4.13722	4.06822	5.40323
chr5:26441303-26447965	Gm10220	4.33913	6.9258	4.23258	3.55313	4.78169	5.20397	6.19593	4.66438	5.49634	6.28	2.92108	5.6848	6.08028	7.43396	5.36987	8.0085	7.63778	5.06621	3.52792	4.06593	4.4485	4.58131	4.58226	4.23305	4.86264	5.16725	5.57159	5.21911
chr4:88425753-88426564	Gm13272	5.80709	2.4823	6.32961	1.4023	8.10915	5.36537	5.88256	4.37809	8.51409	2.73123	4.15994	9.50143	3.36675	2.34583	4.43455	18.9911	6.00777	3.84227	5.52477	3.66366	7.03926	3.45799	1.33045	1.8046	5.25073	4.1961	4.40034	5.19701
chr4:145658643-145683119	Gm13247	6.15233	3.05303	4.04424	7.99582	6.70551	6.81179	6.75194	4.52993	6.28368	7.84338	4.77881	4.04292	1.62618	8.38544	3.94266	5.14966	4.71552	5.35881	9.62727	6.55226	4.22807	5.99877	3.55072	6.32361	1.48339	2.02875	1.35725	5.16006
chr3:97214139-97215102	Olfr1402	5.59007	4.55214	5.88281	4.62312	5.40526	5.20468	5.47096	4.42838	5.60042	6.6199	6.09123	6.17776	5.95489	5.74842	5.47475	5.57544	4.95346	5.359	4.61717	4.7423	5.23845	5.9132	4.59204	4.68314	3.21134	3.24956	2.56511	5.09352
chr7:67019267-67019357	Snord116	2.97701	1.97266	2.87132	3.77616	6.30431	4.64808	1.987	2.98706	2.5586	2.65621	4.8337	4.11194	3.61091	7.22818	6.29473	6.72289	6.0006	6.4516	7.00745	4.05492	3.58782	3.64122	2.87433	3.35764	11.8756	10.0804	11.0452	5.01917
chr4:88445478-88447034	Gm13275	6.56377	1.90532	7.29444	2.10291	5.27217	5.56734	6.83396	3.00912	6.6202	4.52681	3.35501	7.05507	3.83392	2.30823	3.92185	9.95584	6.75573	3.33213	6.44284	4.17747	8.51086	4.672	1.99611	2.48148	5.28847	5.88223	5.64542	5.01151
chr4:146437474-146442545	4933438K21Rik	7.01935	4.89131	4.71156	7.42783	7.49859	6.94082	6.50994	5.93975	5.77449	3.75559	2.93811	3.29167	1.31929	7.46258	1.99172	4.30857	4.32335	4.39735	6.10926	6.32513	2.35386	7.22646	4.49554	7.11111	3.37246	4.12456	3.44122	5.00228
chr3:106004408-106022397	Chi3l4	6.34159	4.153	4.21487	5.17572	4.30042	5.77139	4.20396	2.10501	9.25051	7.86202	5.61373	6.50383	7.54301	6.54514	7.9152	8.58532	4.30867	3.19199	4.44416	2.10583	3.23955	2.99067	3.24939	8.53235	2.20708	2.18366	2.21856	4.99099
chr10:22026525-22032748	C920009B18Rik	6.23855	5.31346	6.10675	6.19946	1.98242	2.9755	1.02027	4.22071	2.14096	6.63803	3.21369	2.14471	4.25084	3.4524	2.93261	7.49372	4.77668	5.25057	3.31456	6.47006	2.09013	4.27624	8.53142	3.77816	11.1424	6.49994	10.9764	4.94188
chr3:93629941-93631039	Tdpoz3	4.02704	3.45021	3.33277	3.26989	4.19554	3.36181	3.37207	4.57072	6.4614	5.15252	5.65515	8.26379	4.36336	8.08845	8.45042	3.26019	4.94273	4.96279	4.06874	6.80313	2.74915	6.24023	5.5873	3.27184	4.05931	4.40961	4.51354	4.84754
chr4:88439645-88441201	Gm13275	6.60837	1.56923	6.88375	1.50047	4.81855	5.47219	6.43937	2.74074	5.55493	4.13209	2.40225	5.94029	4.49352	2.17005	3.47185	12.1659	6.47668	3.19844	5.54628	6.41677	7.50228	3.98043	1.94902	2.48193	5.56599	5.61798	5.43985	4.83479
chr4:147128082-147183897	Gm13157	4.10431	5.99119	5.88492	7.47875	6.87701	5.93375	7.6938	5.36415	4.36284	4.52372	2.64574	2.4412	2.89174	4.32177	2.49094	4.43469	5.38502	4.68522	3.75547	5.857	3.31899	5.92198	4.91365	7.0355	3.78802	4.14606	3.6618	4.81145
chr4:145207048-145214297	Gm13212	6.45216	5.69309	8.0622	8.30251	8.28291	9.63676	10.8233	8.01032	2.43214	1.06175	0.82466	0.95669	1.47202	3.24804	0.835792	3.55552	4.20424	5.91158	3.50576	6.61305	5.23669	6.53481	5.36187	7.15231	1.20218	2.64455	1.20977	4.78617
chr4:88430957-88432419	Gm13276	7.43028	1.79717	8.01934	1.42405	6.10493	5.0924	7.05934	2.6913	7.40276	4.37725	1.89649	7.09089	2.50529	2.19256	2.67923	7.97887	4.96966	3.2028	6.33446	3.81729	6.99425	3.18335	2.77332	4.1133	5.52526	6.23164	6.08141	4.77663
chr4:146064712-146094024	Gm13051	5.46488	6.96169	5.40644	7.77821	7.0539	6.78547	7.82274	5.5505	2.77233	2.68294	0.936877	0.835266	1.71491	3.48217	1.16363	9.04684	5.43048	3.99328	3.96888	5.53066	2.41754	5.97921	3.64161	8.2116	4.74085	4.92628	4.59853	4.77399
chr17:38691136-38697566	Gm20410	5.81008	2.28217	3.97038	5.51957	4.78304	2.80942	5.55864	4.6165	6.42038	5.62612	6.06672	7.06586	5.79966	7.35182	7.13338	6.08469	5.7193	2.19423	4.73205	3.82358	4.12675	2.16612	3.27155	3.96307	3.5914	3.70792	3.73996	4.73831
chr4:145651165-145679000	1700095A21Rik	5.60799	2.87737	3.65756	7.29628	6.13125	6.04297	5.98047	4.04043	5.46178	6.94847	4.21653	3.58058	1.43986	7.49182	3.57899	4.85047	4.24468	4.89458	8.60243	5.97016	3.69765	5.58325	3.25683	5.93826	1.73259	2.15657	1.64417	4.70089
chr10:57697595-57699408	Gm4981	4.98362	4.82569	5.83329	4.95976	4.34095	5.24621	3.82558	4.85374	3.52987	6.05639	4.12915	4.21324	4.8477	5.09777	4.42728	5.6406	4.6095	4.21875	4.18454	4.02172	4.52818	4.08286	4.79895	3.79883	4.64869	4.9488	4.80116	4.6464
chr4:88419737-88420705	Gm13289	7.32961	1.57048	7.98539	1.55643	5.06942	3.73428	7.01947	2.87272	4.91495	3.98353	2.67393	5.48093	3.81195	1.96561	3.17752	8.58294	4.72303	2.86846	6.21905	4.80196	6.36547	3.85273	2.64558	2.7589	6.17879	5.69404	6.05752	4.58869
chr5:26360809-26366045	Speer4a	3.51038	5.85284	3.69697	3.57688	4.18151	5.48261	5.40043	3.54873	5.10978	5.22865	2.19743	5.64474	5.39079	5.40572	5.97551	9.25262	6.63935	3.68196	3.1224	3.85591	3.83822	4.4408	3.6123	3.76819	3.40997	3.68013	3.68454	4.56257
chr16:59361124-59362042	Olfr207	3.53105	6.24544	3.86856	6.21066	4.28395	2.87852	2.2051	3.82106	6.05935	5.78757	7.19465	6.31363	7.00843	5.38446	5.84138	5.59424	3.91384	5.00209	6.0742	3.21662	2.17139	5.09908	6.34269	1.96212	1.93102	2.28608	2.3388	4.53948
chr7:66931359-66931449	Snord116	5.66257	6.15792	2.77093	3.13969	3.91768	3.5725	7.31879	7.39061	7.41098	6.16214	4.12604	5.52967	4.68761	5.16409	3.07806	3.54264	3.05961	2.46085	2.7987	4.11305	3.28608	5.18114	5.23845	5.54339	3.66125	3.06796	3.61026	4.50565
chr14:54285614-54288010	A430107P09Rik	6.52463	6.66813	1.65668	2.56758	5.03377	2.72082	4.86256	2.83542	2.77366	3.53772	5.18235	3.24699	2.8167	2.1048	6.14922	5.76338	4.47037	5.72406	3.32593	3.64163	6.39024	4.31862	2.77741	6.86548	7.07927	6.87068	5.62987	4.50141
chr10:103605568-103608038	LOC100861901	4.25314	5.11802	4.14742	5.31486	5.40005	5.07791	3.41291	4.41943	5.91506	3.87087	3.93546	5.27606	4.87906	5.41016	4.03494	3.89394	4.72754	3.47785	5.26051	5.61506	3.07012	5.71006	3.85975	3.025	3.8723	3.92184	3.46771	4.45804
chr4:147047611-147076662	Zfp534	4.79998	6.02578	4.78884	6.9525	6.35884	6.11042	6.82041	5.07653	3.38975	4.09766	1.2104	1.0393	2.32609	4.33533	1.74486	7.79905	4.82356	4.04719	3.60981	4.88728	2.76582	5.34942	2.99576	6.87905	4.0058	4.21655	3.87282	4.45662
chr4:88422665-88423633	Gm13289	6.7698	1.46393	6.98771	1.38536	4.73373	4.38485	6.6883	2.86077	5.15793	4.53987	1.96811	5.2462	3.4094	2.08577	2.96079	8.80785	5.60082	2.76779	5.80706	4.71395	7.21291	3.38073	2.47197	3.17401	5.32786	5.10675	5.15018	4.45053
chr10:103605568-103608009	Gm6763	4.23365	5.11098	4.13991	5.30404	5.40324	5.07176	3.3994	4.42705	5.89486	3.86715	3.91402	5.25163	4.87061	5.3811	4.01871	3.88588	4.71752	3.45693	5.25098	5.60016	3.06159	5.7088	3.83721	3.01847	3.88725	3.94331	3.47649	4.44936
chr4:143484139-143490283	Pramef6	4.66814	4.45568	4.7589	4.62375	4.78918	4.21883	4.77015	4.65182	4.67085	4.62649	4.6919	4.66745	4.21546	5.1597	6.25055	4.93206	4.17861	4.00708	4.75045	4.64946	4.59176	4.49359	3.38438	3.70865	2.54913	2.84817	2.96226	4.38054
chr10:22122618-22127276	Gm10825	6.86516	3.81894	8.72025	4.30195	3.13621	3.89204	2.47816	6.02219	2.47175	3.68647	2.27602	3.04854	5.07197	4.65671	2.27242	5.34521	4.89468	4.72376	3.25748	3.84595	2.94207	2.75618	5.44042	3.78301	6.33495	4.17299	7.20068	4.34875
chr17:15101152-15115776	Gm3417	2.93598	6.50169	2.83135	2.92948	1.53161	2.6317	2.2916	1.35199	5.76876	3.50607	5.70007	6.15931	4.33872	4.43518	4.25823	4.24569	5.1838	4.96261	3.78584	4.7411	9.71697	2.2454	3.34381	4.96217	6.47353	5.45054	4.94174	4.34166
chr3:105950471-105970482	Chi3l3	6.45183	4.03316	4.09902	5.12524	4.17061	4.08334	4.27591	2.12379	6.36345	7.87845	5.72978	3.49914	5.47109	2.34305	8.06818	4.37694	4.44478	3.25223	4.36558	2.06656	3.18138	3.15436	3.30658	8.68728	2.15743	2.13676	2.29775	4.33865
chr13:12883087-12892346	Prl2c3	6.66153	0.00305416	5.66169	11.4195	0.00966879	13.4746	0.00857891	0.00564406	1.92244	1.06568	2.15549	0.964633	3.5124	1.29447	0.950379	1.40243	4.02485	6.58052	8.05423	4.87653	3.34209	3.91344	5.76567	0.00170886	6.95967	6.0349	16.8627	4.33069
chr13:12883082-12892325	Prl2c4	6.6583	0.00305945	5.65993	11.4119	0.00968552	13.4654	0.00859376	0.00565383	1.92321	1.06685	2.15675	0.964736	3.51249	1.29593	0.950387	1.40382	4.02208	6.57929	8.04852	4.87577	3.33982	3.91331	5.76195	0.00171182	6.95746	6.03364	16.8585	4.32921
chr7:150822629-150835543	Tnfrsf22	6.18375	7.23157	7.08945	5.79366	5.6785	4.25967	5.24888	7.2716	4.37856	4.34076	2.65857	2.34114	4.33426	5.61215	3.66427	4.91652	4.34145	2.45941	4.3802	2.64748	3.17609	2.5916	3.63156	2.98299	4.58348	2.34946	2.49044	4.31991
chr5:146319532-146345599	Cyp3a41a	5.32526	5.88292	5.69973	5.88202	6.35474	4.99	5.94524	3.2821	3.5768	4.9175	6.55748	6.66067	3.41127	3.36674	4.34021	4.49626	3.16499	3.18565	3.09643	3.16908	3.17442	4.52723	2.97372	3.06817	3.0709	3.22044	3.25945	4.3185
chr10:103614078-103616547	LOC100861901	3.9334	4.72746	3.70439	5.13761	5.21314	4.57442	3.06676	3.9307	5.31615	3.55109	4.72647	5.69578	4.56715	4.81924	4.25504	4.30169	4.70933	3.50483	5.51997	5.24349	2.6356	4.8345	4.1899	2.93629	3.85179	3.60731	3.69155	4.30537
chr10:103614078-103616518	Gm6763	3.89586	4.70684	3.69042	5.12468	5.19769	4.54516	3.04144	3.91264	5.31353	3.52756	4.71862	5.68419	4.54671	4.79322	4.23845	4.2944	4.69983	3.4793	5.51041	5.22485	2.61209	4.79545	4.14187	2.91963	3.85234	3.60466	3.68424	4.28726
chr4:146395958-146434908	Rex2	5.10686	4.23296	3.98638	5.85391	5.4094	5.63825	5.44886	4.49458	3.53664	3.69695	2.42018	2.35251	1.71799	5.20376	2.41688	5.34749	4.20674	3.85459	5.30335	5.50487	2.00539	6.03357	3.48352	6.63699	3.87785	4.02401	3.77436	4.28033
chr4:145850602-145889553	Rex2	4.96854	4.20877	3.86834	5.92798	5.42432	5.6801	5.42113	4.53202	3.58554	3.58268	2.39236	2.38814	1.66125	5.07948	2.34851	5.42295	4.09725	3.84846	5.30133	5.5258	1.99884	6.01899	3.45936	6.55424	4.02392	4.0462	3.79614	4.26528
chr5:26408711-26415804	Gm10471	4.71235	4.03839	4.11026	3.91606	4.27597	5.55518	3.59991	4.98018	4.80296	6.01771	1.91336	3.74259	4.08966	8.7927	3.94826	5.44909	3.17959	3.94029	2.82616	3.76377	3.25709	3.9882	2.84979	4.25097	4.43316	4.28827	4.22064	4.25713
chrX:30732633-30734583	Gm2799	3.68176	2.45368	3.71237	2.73388	4.04643	6.09335	3.5661	4.13564	4.79812	4.99594	7.37922	5.29013	7.26285	4.84984	8.92126	6.13305	2.82996	1.88417	2.48484	2.98424	2.36922	2.80128	2.76844	2.26568	5.23177	2.93286	5.99912	4.24464
chrX:30732633-30734588	Gmcl1l	3.67912	2.45247	3.70884	2.73055	4.04289	6.09172	3.56491	4.13199	4.79706	4.99189	7.37642	5.28813	7.26009	4.85076	8.9205	6.13047	2.82716	1.88299	2.48448	2.98124	2.36647	2.79959	2.76663	2.26365	5.22811	2.93311	5.99532	4.24247
chrX:30598310-30600259	Gm2799	3.19429	1.99192	3.80877	2.88588	3.87067	5.75353	3.80193	4.23503	5.34756	5.02162	7.19705	5.61752	7.53879	4.8656	8.06762	5.71381	2.74764	1.85557	2.74606	3.28668	2.50527	2.61538	2.91406	2.69946	5.69565	2.87304	5.66519	4.24132
chrX:30732661-30734582	Mgclh	3.64921	2.45133	3.69827	2.70251	4.03492	6.09724	3.55056	4.1084	4.74929	4.99074	7.32608	5.22516	7.27871	4.84742	8.87998	6.09232	2.81847	1.88644	2.48359	2.98401	2.37323	2.80688	2.76517	2.27242	5.21606	2.93665	5.99606	4.23041
chrX:30732678-30734582	Mgclh	3.62865	2.44971	3.68906	2.6826	4.02732	6.09945	3.54076	4.09102	4.71881	4.987	7.29271	5.18454	7.28823	4.84602	8.85423	6.06669	2.81097	1.88771	2.48277	2.9835	2.37537	2.81015	2.76291	2.27635	5.20585	2.93903	5.99367	4.2213
chr8:28454865-28459660	Tex24	5.28159	3.52621	3.59488	3.87232	4.967	4.23181	5.27959	3.65071	4.00474	5.39831	4.59827	4.65137	4.61127	4.94089	4.63414	4.33427	4.54072	3.60701	2.75942	2.97813	3.63849	2.80154	4.37709	4.27303	4.29222	4.20975	4.41845	4.20271
chr10:103622587-103625055	LOC100861901	4.27867	4.42804	3.72278	4.95412	5.13929	4.3924	3.17301	3.68814	5.69212	3.3632	4.24794	5.20821	4.68293	4.8883	3.83984	3.94029	4.68159	3.44136	4.74964	5.06394	2.74106	5.17665	3.93338	2.86557	3.59868	3.58597	3.51426	4.18487
chr10:103622587-103625026	Gm6763	4.26289	4.42288	3.69855	4.92472	5.11863	4.3665	3.16116	3.66985	5.67592	3.33434	4.23322	5.19153	4.66499	4.86467	3.80678	3.92213	4.66832	3.41799	4.72273	5.0483	2.71733	5.17152	3.91066	2.84725	3.5961	3.57846	3.51033	4.16695
chr12:88943614-88949795	Oog1	4.80003	3.54706	4.48364	6.01243	1.33362	5.39215	3.40389	4.26261	4.58857	6.35915	4.00522	5.74845	3.94809	5.02832	4.50451	4.90618	4.02927	3.95289	4.13298	4.04481	4.00651	2.59908	4.0069	3.70466	2.95576	3.09563	3.19418	4.14987
chr7:114958099-114959020	Olfr467	3.06661	2.80389	3.44722	4.35394	3.78	2.71159	1.87514	2.35191	6.32552	4.23012	3.23056	6.34853	4.21156	8.35917	3.10345	4.63724	5.15479	4.36797	3.31805	3.96395	4.88576	6.03999	4.69316	4.26131	3.38313	3.72315	2.59651	4.11942
chr2:177563695-177575023	Gm14325	3.46334	2.35928	1.02676	1.65891	2.57829	2.16538	2.06707	3.26339	5.16211	8.80345	5.56291	5.81586	7.56309	5.02767	5.15995	7.60158	2.46577	4.85986	7.6064	3.13534	8.58946	2.57994	3.09669	0.366651	3.0045	3.02429	2.4127	4.08965
chr4:88451929-88452897	Gm13289	5.68643	1.60782	5.92928	1.45051	4.91787	4.15015	6.16775	2.52836	4.28274	3.99824	2.26533	4.41799	3.24097	2.0678	2.53515	7.46889	4.7368	3.41217	4.78234	4.65679	5.59973	3.18328	3.12941	3.79142	4.78761	4.4485	4.04594	4.04775
chr17:15115827-15128541	9030025P20Rik	2.59175	6.26601	2.4873	2.84255	1.23266	2.43012	2.02998	1.19947	5.6276	3.49619	5.41911	5.92326	3.68465	4.50995	3.99002	3.62504	4.37894	4.68164	3.41111	4.33162	8.84212	1.80614	3.27886	4.36525	6.15116	5.64922	4.94498	4.04432
chr10:103631096-103633576	LOC100861901	4.01364	4.61627	3.68822	4.7834	4.75537	4.36054	2.97085	3.52872	5.56564	3.22397	3.88278	4.99552	4.52466	4.90109	3.61743	4.03479	4.75357	3.34034	4.92624	5.10819	2.2061	4.30005	3.6846	2.55237	3.40827	3.67798	3.63299	4.03902
chr14:44680551-44681022	Ear12	3.59782	4.17701	3.58649	3.92906	1.98002	3.33171	7.2511	9.1229	3.33432	3.98067	3.27192	4.77086	2.82435	2.88179	3.84339	2.26241	1.84711	4.90896	4.89738	8.90233	6.35257	4.8216	2.60187	2.16059	3.42757	2.64719	2.32911	4.0386
chr10:103631096-103633547	Gm6763	3.99923	4.59356	3.66315	4.80688	4.76486	4.36998	2.97039	3.51598	5.58083	3.22575	3.89813	4.99636	4.52787	4.91885	3.61873	4.04497	4.75891	3.32203	4.9172	5.09576	2.19612	4.27519	3.64721	2.54645	3.4079	3.67747	3.63774	4.0362
chr4:73329417-73333463	Gm428	3.9709	2.89836	3.86807	2.961	3.47505	4.11772	3.5652	4.58581	3.68317	5.10849	2.59408	2.06144	4.45494	6.03259	8.40255	2.87918	2.99499	3.6272	4.02676	3.7739	3.18105	3.8923	3.08591	3.08247	4.95654	5.74866	5.62354	4.02414
chr10:103614078-103625055	Gm4340	3.87199	4.93484	3.4961	4.96156	4.48407	4.26376	2.90975	3.62007	5.20911	3.22213	3.8014	5.15283	4.20307	4.76852	3.74194	3.85902	4.49312	3.16346	4.8872	5.0403	2.35397	5.04636	3.63362	2.60673	3.63486	3.67215	3.57489	4.02247
chr10:103605568-103616547	Gm4340	3.74181	4.89076	3.45521	4.95938	4.53646	4.38809	2.95176	3.72055	5.03062	3.21848	3.84999	5.15646	4.0866	4.87447	3.62462	3.74749	4.2381	3.14347	4.54577	4.89817	2.41466	4.89479	3.47531	2.52955	3.70546	3.48876	3.47897	3.96466
chr13:113884034-113891189	Gzma	2.75081	2.09979	1.99283	2.79512	2.05571	5.81415	2.0483	2.10351	5.41143	3.06717	2.6377	3.02676	6.96542	5.77024	6.00602	5.5417	5.56691	3.79597	5.76604	5.72277	5.81343	2.83377	5.75214	5.65209	1.89648	2.05214	1.9401	3.95846
chr17:15146803-15159413	Gm3435	2.59971	6.41328	2.29699	2.84503	1.38056	2.23984	1.96238	1.36837	5.13977	3.61056	5.60605	6.04035	4.2461	4.68315	4.59853	4.10251	4.53827	4.41299	2.55665	4.51954	7.04339	1.87606	2.81657	3.71854	6.0979	5.12356	4.88052	3.95249
chr7:16486994-16489379	Crxos1	3.53326	3.10296	4.17527	5.43833	8.52125	5.89647	3.97578	4.81002	2.716	4.71691	4.54869	3.03004	2.82621	1.91127	3.61798	4.8207	2.95632	4.33476	8.41876	3.90342	7.31067	1.78774	1.96053	1.9234	1.95048	2.18154	1.94841	3.93767
chr7:24487360-24488302	Vmn1r173	2.24807	2.52017	3.80468	1.8682	2.54042	2.84177	1.99931	2.09532	9.70561	2.90309	5.64368	12.2952	2.07681	13.2204	4.42707	4.7644	2.03365	4.24883	2.0926	4.00065	2.3213	3.28521	4.62754	1.82473	2.28999	2.29821	2.02862	3.92613
chr3:92748407-92749652	Lce3c	4.63855	4.73544	3.27044	4.31171	3.43942	1.81005	2.37439	4.85874	4.53338	3.33047	3.27241	4.54343	3.08211	4.49141	3.12761	3.28222	4.31318	4.94461	7.76406	4.62124	5.02338	3.6535	4.4367	4.70288	2.24482	1.96275	2.10233	3.88412
chr17:36322515-36327096	H2-T3	5.56452	3.81499	3.64988	2.98878	2.42308	2.08073	7.32717	2.52009	3.50036	4.25999	3.4772	3.47012	2.40453	5.08753	3.48837	4.7337	3.98634	4.76538	2.64236	2.92768	3.85915	4.65194	3.08465	4.18961	4.21351	3.22047	6.09532	3.86768
chr14:52383566-52393265	Ang4	5.72281	5.67425	5.27193	4.37787	4.54409	4.63096	4.73345	3.54412	4.92134	3.39985	3.5191	3.99228	5.21396	3.57823	3.12094	4.02304	3.48546	3.73473	2.72882	3.98358	3.88532	3.74243	3.546	3.41124	1.24884	1.21242	2.28402	3.83448
chr10:21893326-21903720	Raet1e	5.68344	3.00249	6.69	2.54825	2.82279	2.16374	2.01829	6.28224	1.95505	3.30836	1.52668	2.52578	4.04136	3.54275	1.27904	4.44041	4.42896	4.26119	3.16397	3.10684	2.93607	4.0187	5.56502	3.09316	6.50469	3.71059	7.10622	3.76763
chr1:175200277-175201268	Olfr418-ps1	4.22705	4.40456	3.13155	3.55524	4.37349	4.00027	3.94309	3.9079	3.65923	3.92878	3.91644	4.61437	3.68791	2.69198	4.08435	3.64151	3.44196	3.29119	3.7967	3.75774	4.30786	3.65726	3.80845	4.30462	3.25218	2.8196	3.09718	3.75194
chr17:15132746-15147148	Gm3417	2.42685	6.01821	2.30061	2.64272	1.22095	2.16319	1.92375	1.19264	4.90925	3.38562	5.30642	5.61238	3.90586	4.62237	4.00673	3.62996	4.1997	4.1715	2.7107	4.19706	6.58541	1.90064	2.73338	3.54701	5.62108	5.13368	4.50398	3.72488
chr17:13679886-13746960	2700054A10Rik	1.99002	2.35861	2.86428	2.57033	5.72889	4.72076	1.83473	4.9724	4.02586	3.43394	4.81502	4.65819	4.58512	4.80568	3.05647	2.62089	2.76072	3.4664	5.71758	2.98886	3.12258	3.91778	3.28593	4.22709	4.22842	3.86314	3.86877	3.72179
chr4:88442645-88444107	Gm13278	4.76485	1.40692	5.18235	1.51014	3.73401	4.82604	4.45777	1.98503	6.16545	3.33849	2.0822	6.70742	2.02057	1.43405	3.0644	5.29021	4.86056	3.62505	3.80269	3.55845	6.53856	3.20273	3.26323	4.47834	2.81825	2.79628	3.34761	3.71339
chr1:176029590-176030538	Olfr427	4.08736	3.54028	3.45937	3.49293	3.39012	3.78366	3.98416	3.76787	3.70993	3.83809	4.04098	4.01416	3.72341	4.33596	3.29299	3.34946	3.76883	3.48981	3.351	3.77908	4.15682	4.04399	3.77527	4.05494	3.0212	2.8938	3.61431	3.69481
chr1:176029590-176030541	Olfr426	4.08459	3.53984	3.45903	3.4885	3.38823	3.78018	3.98256	3.76654	3.70759	3.83744	4.04069	4.01151	3.71992	4.32969	3.2894	3.34812	3.76438	3.48698	3.34838	3.77501	4.1541	4.04153	3.77252	4.05146	3.01952	2.89003	3.60912	3.69211
chr14:7915538-7937971	Gm3696	2.88201	2.85522	2.46535	2.58492	2.90161	3.28418	2.84604	2.63407	1.99899	3.65937	3.06749	3.59889	3.46741	2.53265	3.52831	4.73797	4.60806	3.33057	4.09147	5.53958	3.1852	4.25171	4.86057	5.40732	4.75145	4.85251	4.78982	3.65603
chr14:4126976-4144402	Gm5796	2.19576	3.25844	3.12772	2.03973	3.31699	2.33335	2.92017	3.19323	2.52806	4.43237	3.93932	5.90433	4.92703	2.5768	4.71016	4.46782	4.23556	2.53553	3.24773	3.39698	2.93839	3.90564	4.02499	5.21306	4.18582	4.50669	4.21747	3.63997
chr17:15164114-15178523	Gm3417	2.47481	5.87157	2.26788	2.41909	1.40089	2.09514	1.73839	1.19137	4.73644	3.45712	5.48795	5.51086	3.91391	4.41321	4.0409	3.6636	3.89067	3.88049	2.50815	3.97907	6.09766	1.79045	2.62431	3.26688	6.03663	4.97949	4.42494	3.63562
chr17:15164117-15178523	Tcte3	2.4748	5.87179	2.26778	2.41898	1.40093	2.09509	1.73828	1.19139	4.73646	3.45726	5.48826	5.51095	3.91378	4.41315	4.04087	3.66359	3.89069	3.88031	2.50819	3.97906	6.09733	1.79034	2.62423	3.26697	6.03661	4.97936	4.42482	3.6356
chr4:146514185-146556724	Znf41-ps	4.64302	2.46846	1.88855	4.7408	4.55239	4.30751	2.98315	2.77435	4.99148	3.46671	2.91496	2.33659	1.21698	6.53384	2.61559	4.80111	3.24105	3.17187	4.88712	5.00769	1.98509	5.3166	2.99832	5.98315	2.5874	2.82956	2.47094	3.61905
chr14:51874936-51875787	Ear11	3.06362	2.11254	1.82622	2.79497	2.16748	1.88671	5.07797	4.08914	4.15742	3.86759	3.90514	5.27548	4.05011	3.68665	3.98143	3.24501	2.55959	4.35965	4.42109	6.11387	4.87042	4.37363	2.71185	1.80455	3.73812	3.76497	3.54657	3.60933
chr10:99844280-99845194	Gm4301	3.83531	5.13028	3.55655	3.52603	4.26878	4.82144	3.92	3.91456	1.05419	3.4921	3.09735	3.45005	3.98173	2.0665	4.02145	3.55887	3.19982	4.5516	3.94	3.85656	3.37636	5.0665	4.58916	3.68563	2.47149	2.55485	1.82086	3.58548
chr4:88422825-88423374	Gm13285	4.22933	1.03146	4.70433	1.20649	3.4506	3.96667	4.46369	1.83217	3.93119	3.53049	1.2773	3.90845	2.42034	1.69334	2.55704	7.55102	4.93881	3.01104	4.70839	3.99209	5.64793	2.81498	2.79724	3.56985	4.50066	4.40937	4.4626	3.57803
chr14:7838628-7859963	Gm10406	2.09348	2.61643	2.31615	1.81553	3.11966	2.34284	2.0915	2.9796	0.704814	2.6984	2.82801	3.06452	2.67235	1.27395	3.427	4.08168	2.48243	2.8047	3.88542	7.21928	3.32668	3.40148	5.30876	4.53428	7.51454	7.89234	7.9388	3.57165
chr8:28406516-28407672	Gm9731	4.19849	2.96061	2.53176	2.50335	4.0456	4.53156	4.34517	2.71671	4.31148	4.61942	4.61752	3.91658	4.58753	3.93669	4.19628	3.81343	3.67254	2.92907	1.84854	2.04046	3.00271	1.87346	3.55996	3.71843	3.9274	4.10698	3.87505	3.56988
chr4:88436798-88438260	Gm13278	4.98875	1.52336	5.23457	1.28295	3.39426	4.54141	4.45721	2.04946	4.49718	3.31126	2.47624	5.07802	1.95964	1.64134	2.76138	5.99772	4.15085	2.83238	4.25834	3.4751	6.07602	2.99861	2.52349	3.15769	3.87684	3.85353	3.83842	3.5643
chr2:177493992-177507980	Gm14322	2.25502	1.8367	1.65661	2.41387	3.99661	2.34143	2.18521	3.13747	6.81564	6.23552	4.06799	4.51658	4.74431	6.63162	3.04315	6.91773	1.93855	6.3106	4.56584	3.55493	5.2223	1.96546	1.94434	1.71008	2.46366	2.47282	1.29183	3.56429
chr4:88419897-88420446	Gm13285	5.27286	1.37886	5.72525	1.47787	3.50382	3.324	4.40611	1.85813	3.63228	2.7268	2.29587	4.33707	2.71735	1.40848	2.5744	6.75267	3.96531	2.9762	4.80564	4.4041	4.82347	3.00447	2.82753	3.14549	4.13134	3.79809	4.42241	3.54429
chr17:13244186-13245146	Gpr31b	2.74331	2.61135	2.62359	2.88031	3.77598	3.31682	3.13801	3.24627	3.86022	4.20987	4.14661	3.51438	4.69254	4.26877	4.56424	3.83869	3.5344	2.50289	3.70938	4.02731	3.57049	2.90111	3.26056	3.14842	3.52821	3.56569	4.12181	3.52968
chr12:89112519-89116307	Gm2016	3.56857	4.4209	3.44236	2.79214	2.6587	4.22815	3.97746	4.09044	4.21535	4.51708	3.17014	4.2325	3.78817	4.47788	3.73343	3.25019	3.12436	3.23186	3.68527	3.22371	3.14444	2.6209	3.37641	3.16969	2.91704	3.04463	2.8196	3.51561
chr10:99798309-99799223	Gm4301	3.50612	5.36689	3.71116	3.51178	3.75949	4.80722	3.56409	3.51104	1.55948	3.57932	3.24912	3.05386	3.94899	2.05731	4.21303	3.98885	3.6372	4.1262	3.85255	3.51859	2.53358	4.96036	4.52017	3.75408	2.47152	2.11435	1.81111	3.50694
chr4:88452089-88452638	Gm13285	4.30648	1.21498	4.32605	1.37119	3.19739	4.019	4.76374	1.82908	3.56793	3.19332	1.76185	3.86528	2.53003	1.65695	2.27928	6.93592	4.32932	3.48489	4.00076	4.25799	5.15471	2.56923	3.0012	3.97112	4.76033	4.20197	3.96343	3.5005
chr17:6429259-6435443	Dynlt1b	2.0013	2.59658	2.27942	1.9038	6.16008	5.33694	2.57157	6.06321	3.19393	3.38438	4.49932	3.88326	3.11771	2.25711	2.58099	2.59177	4.04436	2.74375	6.66903	13.9486	1.84468	4.75837	1.72844	3.38127	0.262655	0.332583	0.313394	3.49809
chr14:43371374-43376742	Gm10377	2.36754	1.64283	1.86527	2.49069	2.81998	1.8533	4.71426	3.20854	3.44282	4.03314	6.76085	5.86567	5.50689	4.16944	3.36713	2.40211	1.83648	6.34572	3.25109	5.79612	5.24022	3.08458	4.93676	3.38542	1.42542	1.32873	1.28261	3.49717
chr4:3111531-3112452	Vmn1r3	4.08916	4.01838	3.49545	3.38253	3.50223	3.74882	3.51533	3.81032	2.82977	4.14781	3.55954	3.68876	3.99786	3.37287	3.79874	3.93958	3.76231	4.01201	4.15874	2.567	2.44122	3.05158	3.44146	3.22514	2.87108	2.74888	3.04432	3.48966
chr4:146506201-146554688	Gm13139	4.52103	2.43761	1.92827	4.60274	4.46726	4.28843	2.95192	2.7121	4.73432	3.36281	2.84309	2.27039	1.15783	6.18886	2.48372	4.56099	3.16234	3.08078	4.72508	4.83546	1.93498	5.09598	2.90754	5.70946	2.32151	2.58708	2.24573	3.48583
chr7:16481472-16489379	Crxos1	3.33635	2.70399	3.54864	3.53264	7.06766	4.87032	3.47899	3.84804	2.36507	4.59409	3.83658	2.68342	3.05657	2.03985	3.40209	3.84226	3.08115	3.06056	8.3292	2.97786	5.42181	2.04328	2.04653	2.11874	2.06658	2.08861	1.92123	3.45786
chr14:8377664-8401080	Gm3558	1.7919	2.17949	2.32821	1.53736	2.49364	2.52477	2.72969	1.77287	2.84216	4.19898	4.57704	4.57279	5.20956	3.41898	4.58229	5.60633	2.95193	2.36401	2.76256	4.00252	3.17694	4.67441	3.37172	4.44512	4.23493	4.36965	4.3349	3.44647
chrX:32129796-32131700	Mgclh	3.88578	1.95116	3.62174	2.36357	3.7435	5.82533	3.91704	4.14876	3.63498	4.06245	6.92219	3.95347	5.22689	2.72171	7.84288	4.58935	1.91589	1.31014	2.30825	2.02307	1.39892	2.15495	1.93428	1.5717	3.97546	2.04752	3.92127	3.44342
chr4:143379236-143385488	Gm13023	3.59511	3.60538	3.56166	3.78617	3.59604	3.26322	3.61276	3.49956	4.52956	3.7496	3.77534	3.97411	2.98273	4.90878	4.6249	3.65569	3.68452	2.81508	3.75244	3.55316	3.51446	3.64702	2.15326	3.00178	1.91731	1.86131	2.21661	3.43843
chr7:66938957-66939047	Snord116	3.93793	3.92061	3.58117	2.96392	3.01125	2.45647	3.43021	3.53542	3.58094	2.12683	4.24278	4.58578	2.93506	3.83955	3.03821	3.329	2.77382	2.63625	2.34984	2.58696	3.7173	4.54578	5.1184	4.44943	3.29663	2.80078	3.71683	3.42619
chr17:95214078-95233760	2610044O15Rik8	3.3747	3.51921	3.45268	3.53025	3.68782	3.47889	3.35702	3.42905	3.43836	3.55714	3.79772	4.31765	3.4589	3.50475	3.56333	3.44476	3.34571	3.50162	3.51069	3.42506	3.50189	3.45062	3.35368	3.44883	2.8138	2.67717	2.49459	3.42355
chr14:5153653-5162268	4930555G01Rik	2.91743	4.37296	3.32068	2.072	2.76591	1.86498	1.77904	2.64362	1.55978	5.12759	2.84904	6.19445	4.8192	2.86237	4.46772	3.66035	2.63943	2.00459	2.49174	4.59337	2.60436	2.95677	3.27634	4.1517	4.5996	4.87493	4.88375	3.42051
chr10:99829132-99830046	Gm4301	3.71288	4.81904	3.09785	3.17439	4.31662	3.93612	3.28833	3.64873	1.08954	3.219	3.38162	3.34015	4.19574	2.09915	3.74008	3.66988	3.44665	3.83521	3.90164	3.23441	2.81531	5.03106	4.00032	4.01074	2.34613	2.56756	2.33587	3.41682
chr10:22081699-22093945	Raet1d	4.32831	3.3255	5.28629	4.82758	1.63683	3.1802	1.23547	4.35113	1.45932	3.46015	1.77129	1.91254	2.3028	3.66372	2.14346	4.2945	4.04354	3.89393	2.11613	4.11131	1.42103	2.18579	4.63465	3.06525	6.54412	4.74059	6.1005	3.40874
chr4:143399893-143405996	Gm13084	3.55047	3.5998	3.67373	3.57678	3.91611	3.43284	3.61756	3.76795	3.45577	3.77903	3.84316	3.92232	3.02849	3.9642	4.73317	3.59429	3.7953	2.91115	3.65291	3.73188	3.72361	3.75926	2.01382	2.77588	2.06103	2.05989	1.99488	3.40501
chr12:89521310-89525514	Gm7104	4.06512	4.09627	4.17596	3.47857	1.39735	4.8014	3.56192	4.15657	3.61542	3.34774	3.06472	3.92594	3.14066	3.27648	3.28797	3.8932	3.16996	3.21069	4.13661	3.12357	2.8505	2.95566	3.1163	3.80166	2.82007	2.74196	2.62556	3.4014
chr5:146505623-146531712	Cyp3a41a	3.89881	4.2043	4.02208	4.26496	4.6054	3.74479	4.27392	2.70162	2.80075	3.86468	5.06292	4.12695	2.73505	2.89431	3.40234	3.68782	2.78088	2.8644	2.94026	2.76194	2.77949	3.23072	3.00235	2.83699	2.7769	2.72252	2.65242	3.39406
chr7:39303157-39313212	Gm5591	1.93867	1.84099	1.79799	1.9405	3.58148	1.85284	3.36981	3.17068	1.52117	0.888236	6.03628	4.06134	1.16766	3.31891	6.8469	3.5664	5.86219	6.32472	3.29529	7.53583	2.30681	2.81605	6.94064	3.4614	2.38611	1.78504	1.93411	3.39067
chr17:40087464-40092232	Esp38	2.95285	1.91966	0.968166	3.85027	3.29517	6.91161	3.0129	4.12156	2.01322	3.21994	7.40641	3.14808	3.95297	3.23018	1.16923	4.12962	5.70604	3.1674	6.23107	0.999556	6.5523	3.93742	0.954817	2.02609	1.78573	1.8147	1.94258	3.34887
chrX:30977837-30979741	Mgclh	2.9466	2.10023	2.83703	2.5355	2.60352	4.43991	3.10236	3.15884	4.10061	4.09705	6.33074	4.05432	6.2713	4.0406	7.77751	4.20619	1.9978	1.69536	2.47535	2.27445	1.76746	2.60412	2.01886	1.53748	3.54412	1.74056	4.14291	3.34818
chr17:22738114-22756100	Vmn2r112	5.96148	6.07624	5.03463	4.98278	4.21992	3.96213	5.14742	2.06526	2.1451	2.06846	3.21522	3.2162	2.1086	2.19809	2.13696	3.17127	3.11321	3.21714	2.13507	3.12953	4.2148	2.09892	3.14284	5.18897	2.18342	2.19421	2.05373	3.34747
chrX:30977820-30979741	Mgclh	2.9467	2.10665	2.83464	2.53709	2.60167	4.43101	3.09603	3.16044	4.09807	4.08302	6.31397	4.05372	6.26776	4.03714	7.77296	4.19301	2.00153	1.69489	2.47726	2.27067	1.76834	2.60503	2.02511	1.53469	3.54882	1.74022	4.14268	3.34604
chrX:30977792-30979742	Gm2825	2.94159	2.11291	2.82561	2.53964	2.59837	4.41703	3.08234	3.15362	4.08551	4.06009	6.28673	4.04305	6.25331	4.03161	7.76516	4.17179	2.00728	1.69408	2.48003	2.26357	1.76773	2.60208	2.0302	1.53071	3.55607	1.73929	4.14163	3.34004
chr6:136778451-136783971	C030030A07Rik	3.39551	3.46832	3.3936	3.54712	3.36542	3.55859	3.44842	3.38435	3.56212	3.38806	3.5696	3.40919	3.62402	3.52186	3.61572	3.24599	3.34962	3.59501	3.36913	3.59919	3.44239	3.3039	3.36224	3.535	2.14684	2.51396	2.4205	3.33836
chr4:73281698-73288074	LOC100502924	3.50735	2.27538	3.25607	2.6095	2.59916	3.86098	2.51636	3.64343	3.39105	4.67793	2.69559	1.56829	3.46722	5.27674	7.02815	2.43472	2.32724	2.78912	3.23066	2.9638	2.87243	3.09569	2.61829	2.30777	4.27207	4.67925	4.15019	3.33757
chrX:3242047-3243544	Gm3750	2.61762	2.46369	3.05622	2.04916	2.95856	4.18686	3.07493	2.89276	4.14124	4.43592	6.38423	4.28919	6.48954	4.34887	7.61245	3.66457	1.94318	1.33602	2.29051	2.32822	1.46266	2.16147	1.96201	1.58827	3.80858	2.30852	4.07005	3.33057
chr14:44020916-44026344	1700001F09Rik	2.62055	1.97379	1.8554	2.51565	2.75309	1.67273	5.53137	3.96183	3.81405	3.6424	4.89464	3.4348	4.12586	3.91621	4.10231	1.1722	1.89897	5.12904	3.39303	5.80652	4.77398	2.84208	4.30555	3.64545	1.8454	1.95413	1.96396	3.31648
chr14:44680318-44681196	Ear2	3.37084	4.10054	3.33937	3.47662	1.91611	3.22603	5.18845	7.1485	2.51109	2.91821	2.51465	3.56833	2.07531	2.08113	2.7838	2.01746	1.98888	3.60629	3.75543	6.63443	4.80905	3.85249	2.34671	2.22566	3.2221	2.47917	2.21383	3.31002
chr1:94387394-94388330	Olfr1415	3.84204	3.72307	3.46823	2.06773	2.31212	1.43653	1.86828	5.93076	3.09137	3.41501	2.74958	1.8342	3.87539	7.18249	4.45473	3.8797	2.39237	4.43603	2.09481	2.38328	3.94264	4.31408	3.41646	3.79668	2.88684	2.34161	1.99338	3.30109
chr7:111127689-111128655	Olfr635	3.30658	3.65467	2.97233	4.34984	2.31949	3.61699	3.56712	3.57673	3.23879	3.99178	4.01129	3.73843	3.57419	4.07301	3.02768	4.889	2.53018	3.64617	2.169	3.60742	3.66075	2.83664	3.28822	2.00424	2.42732	2.30139	2.74958	3.30107
chrX:3241680-3243584	Mgclh	2.51281	2.47823	3.05336	1.98593	2.92709	4.19635	2.93982	2.90305	4.06027	4.2687	6.30028	4.32921	6.51591	4.23555	7.60557	3.80365	1.995	1.34383	2.31787	2.3231	1.49013	2.10803	2.01449	1.57906	3.73894	2.13864	3.91747	3.29935
chr14:57633970-57637819	B020004C17Rik	2.10755	1.94946	2.23091	2.15756	2.09676	2.46733	2.99302	2.19577	4.52916	5.50761	7.38398	3.32823	3.06418	5.13478	4.25041	4.48557	2.90543	3.06227	2.57354	3.39204	3.21256	3.319	2.89824	2.9728	2.81132	3.06447	2.85058	3.29424
chrX:3241680-3243601	Mgclh	2.51001	2.48432	3.05389	1.97783	2.92341	4.17941	2.93996	2.89897	4.0518	4.25917	6.28959	4.32261	6.51088	4.21744	7.56613	3.78449	1.99057	1.34177	2.31189	2.32055	1.49382	2.10568	2.01317	1.58033	3.72991	2.13462	3.9153	3.29287
chrX:3241669-3243629	Gm14345	2.47894	2.4647	3.01913	1.96415	2.90554	4.161	2.91041	2.87706	4.01128	4.20169	6.21764	4.29285	6.44585	4.19309	7.5105	3.75257	1.9846	1.338	2.30267	2.3087	1.4883	2.09139	2.00196	1.56946	3.71433	2.1245	3.91331	3.26828
chrX:3241674-3243629	Gm3706	2.47974	2.46458	3.02018	1.96444	2.90436	4.157	2.91246	2.87555	4.01195	4.20447	6.21932	4.2922	6.44455	4.19091	7.50695	3.75307	1.98408	1.33821	2.30249	2.30869	1.48748	2.09239	2.00102	1.5704	3.7146	2.12631	3.91468	3.26823
chrX:3241678-3243629	Gm14351	2.48039	2.46449	3.02103	1.96467	2.90342	4.15378	2.91411	2.87433	4.01249	4.20671	6.22067	4.29168	6.44351	4.18917	7.5041	3.75347	1.98366	1.33837	2.30234	2.30868	1.48682	2.0932	2.00027	1.57117	3.71482	2.12777	3.91578	3.26818
chr15:98143019-98143979	Olfr257	3.38957	2.71018	3.18099	1.94317	3.71264	2.98703	4.3053	2.22613	3.58737	4.46337	3.89534	3.87634	4.1322	4.71867	1.87939	2.7804	2.27144	2.37101	3.00374	2.0268	3.95304	2.89288	3.09516	3.12321	3.55824	3.51834	4.02946	3.24561
chr7:12626647-12627568	Vmn1r77	3.14451	3.34389	2.86171	3.45841	3.30775	2.80953	2.79718	3.10626	3.13173	3.92098	3.40323	3.43096	4.15101	4.13047	3.47042	3.7983	3.45877	3.0803	2.97694	2.82588	3.44336	2.85554	3.19901	2.75724	2.64568	3.29779	2.8107	3.24509
chr6:128798061-128841142	BC035044	2.53192	2.56494	2.54288	2.60203	3.11891	3.02117	4.81158	2.62745	3.59079	5.79937	3.03737	2.40291	3.773	4.67496	4.4043	3.833	2.58744	2.46289	2.81676	4.87778	4.13099	2.53693	2.359	3.69485	1.87065	2.62655	2.06889	3.2359
chr17:31391964-31414301	Rsph1	1.93592	3.80704	2.93356	1.94292	2.73941	1.97623	2.87418	2.81733	2.86429	6.20581	4.54628	3.40486	2.82858	2.85725	3.97087	3.86258	3.80158	3.83399	3.64725	3.82952	1.86944	1.95217	2.74677	3.82205	2.71424	2.84802	4.60605	3.23104
chrX:31060181-31060959	Gm2837	2.92381	2.90367	2.54173	2.9099	3.04459	4.97756	2.58572	2.80412	2.96557	5.7214	7.37529	2.69113	4.1029	2.50712	9.06885	5.76274	2.50983	1.15503	3.07535	1.67237	1.01895	2.20247	2.33117	1.31742	2.28398	1.21846	3.49266	3.22829
chr7:24839792-24840710	Vmn1r183	5.75102	1.95714	1.8996	5.96379	1.52997	1.67659	8.73969	3.91295	1.85476	2.10041	2.15394	2.06983	2.0629	2.49548	1.88416	2.0992	1.80388	2.29606	9.76538	2.28565	5.57032	1.86311	2.09989	1.6811	4.61156	2.40168	4.30913	3.21627
chr7:149482281-149482974	Krtap5-1	3.62131	3.00652	2.41697	4.53308	4.0531	5.67511	2.89761	3.9826	2.7863	3.95986	2.83018	3.1738	2.88298	2.49906	2.56956	3.45788	4.24921	1.98601	3.4184	2.28404	3.5728	3.42021	5.70394	2.40231	1.79055	1.66424	1.92832	3.21355
chr4:145427121-145427895	Gm13238	4.30298	1.99816	2.47119	5.09445	4.24854	3.92938	3.42693	2.94407	3.21718	2.39868	1.21947	1.57733	1.10785	4.89398	1.61388	4.11672	2.24308	2.51957	5.091	4.27369	2.76177	5.42212	2.46103	4.27988	3.90771	2.51155	2.58269	3.20796
chr8:22812995-22814119	AY761184	4.56833	3.7646	4.28656	3.89737	3.97389	2.87333	5.17692	4.42295	2.82493	3.27716	2.55562	4.31126	2.75326	4.08172	2.67539	2.28096	4.23797	3.46078	2.02767	3.2367	2.06055	2.10328	3.03896	2.9947	1.98376	1.99654	1.72843	3.20717
chr6:56974331-56975267	Vmn1r7	2.67276	3.17824	3.08506	2.36854	3.49396	3.2486	3.31006	2.79536	3.56016	2.59479	3.75368	3.20856	2.92034	3.83897	3.16647	2.4487	3.23685	3.77555	3.0338	3.13322	3.81752	3.43366	3.51829	2.98684	3.13642	3.36967	3.15481	3.19411
chr1:175850533-175872591	Ifi203	3.62515	2.99789	2.74609	3.63901	3.49693	3.322	3.55126	2.28546	3.93468	2.63304	3.21797	4.52734	3.89936	1.34674	3.58842	1.2113	4.84148	3.1811	2.79575	3.19374	3.16512	4.27193	3.69083	3.80638	2.34248	2.30497	2.28459	3.18152
chr1:175850533-175872623	Ifi203	3.62233	2.99537	2.74457	3.63666	3.49664	3.31983	3.5486	2.28452	3.93275	2.63025	3.21589	4.52485	3.89692	1.34549	3.58673	1.20972	4.8388	3.17941	2.79578	3.19246	3.16333	4.26992	3.68875	3.8036	2.34135	2.30488	2.28515	3.1798
chr11:98508072-98519271	Gsdma2	2.19246	2.64034	4.20918	2.5149	4.00947	3.4151	3.88553	2.70421	2.98738	3.31901	3.55068	2.37618	2.72349	3.24766	5.25633	2.65351	2.37194	3.00749	2.56391	3.4957	2.82642	2.90207	2.70233	4.64063	3.24263	3.169	3.13418	3.17562
chr1:135247142-135256900	Ren2	3.46598	3.59017	2.87217	3.6408	3.55974	2.20122	3.43268	3.75544	2.82054	4.17844	2.90053	2.96629	2.13853	2.05844	2.21378	4.7328	3.5396	3.56373	3.64315	3.69362	2.84176	3.6838	3.64546	3.70963	2.33467	2.0198	2.40217	3.17055
chr1:135247250-135256896	Ren1	3.46129	3.59039	2.87488	3.64632	3.56198	2.20434	3.43003	3.758	2.82252	4.17834	2.89969	2.96417	2.135	2.0543	2.21643	4.72491	3.54953	3.56686	3.63821	3.69615	2.83279	3.67577	3.64411	3.71701	2.33691	2.01868	2.40348	3.17045
chr17:38776391-38782598	Gm20516	3.25159	2.84099	2.9786	3.24461	2.27296	0.902581	3.2878	2.3528	3.65652	3.31084	4.96619	3.95653	4.64162	4.10921	3.32935	3.02815	3.69297	2.99661	2.16245	3.39963	3.29588	3.04466	3.50033	3.4453	2.77713	2.46259	2.42045	3.16031
chr2:174887049-174893264	Gm14393	2.69783	1.22754	1.05891	1.64947	2.04764	1.46662	1.92792	1.91339	3.31839	4.41977	6.20004	5.06317	2.99715	1.99796	5.59001	4.92737	2.24898	5.88849	4.42045	2.37879	8.90693	2.4256	2.41923	2.13089	2.01636	1.80194	2.09515	3.15689
chr6:129994056-130015320	Klra33	2.51931	3.90193	3.30262	2.4022	4.01282	4.30971	2.64047	3.04835	3.34006	1.78608	3.97025	2.60692	4.53717	3.68057	2.93807	2.59033	3.17243	3.62329	2.26588	2.0431	4.39505	3.96639	2.34628	3.28163	2.30202	3.43947	2.78864	3.15596
chr7:150851711-150871777	Tnfrsf23	3.51618	4.26748	4.12491	3.62543	3.72965	2.85172	3.4343	4.29295	3.83159	2.55328	2.75913	3.04578	2.879	4.67503	1.519	3.80361	2.7529	2.64031	2.71518	2.56482	2.65726	2.56447	3.10523	2.79191	3.05736	2.55685	2.66238	3.14732
chr6:66628787-66629678	Vmn1r35	3.10049	4.10102	1.8648	2.9028	2.61138	2.76188	2.70507	1.86085	3.36481	2.41881	2.63077	3.501	2.65134	3.96397	2.12225	2.69584	3.8643	3.96857	3.56002	3.74364	3.77052	3.50329	3.36235	3.37716	4.25334	2.95285	3.25254	3.14317
chr3:93455463-93456608	Tdpoz2	3.26508	2.23198	2.24959	2.68465	2.68787	2.29095	2.69707	3.77092	3.76999	3.4531	3.24287	4.93227	3.65354	5.44103	3.86837	2.46398	2.4015	2.57241	2.29398	2.93348	2.77919	3.74797	3.5867	2.39856	3.2605	2.90679	3.14721	3.13821
chr7:10561593-10577488	Vmn2r49	0.821421	4.23675	1.73331	3.21291	4.65811	1.8593	0.906662	3.20526	4.69632	3.14665	2.6367	3.69845	3.76952	3.17981	3.62096	2.57992	2.18323	3.8929	2.43754	2.21506	3.0734	3.67295	2.16656	2.13088	5.08236	4.95801	4.9327	3.13732
chr17:30763880-31012209	Dnahc8	1.88846	2.80995	2.81492	1.873	1.88107	1.7425	1.89322	1.88392	1.88334	2.96661	2.7308	1.74451	3.72992	2.05136	1.90162	4.80112	5.60372	4.67855	7.40816	5.57535	3.74555	3.74505	2.83497	3.71124	2.9322	2.96331	2.90759	3.13711
chr14:44180291-44185678	Gm10375	2.2332	1.86909	1.70956	2.15974	2.56447	1.67166	4.40977	3.37858	3.45864	3.57942	4.98391	3.67108	3.68117	4.08888	2.95189	2.08423	1.9267	5.48132	2.89003	5.28296	4.62749	2.6184	4.45895	2.75369	2.2872	2.00803	1.85919	3.13664
chr14:43688720-43694109	Gm10377	2.54213	1.50663	1.47491	2.45593	2.65681	1.65291	4.27792	2.91926	3.32248	3.46871	6.09745	5.14452	4.5912	3.90753	3.41668	2.21946	1.67669	5.28087	2.44036	5.09147	4.37665	2.87781	4.2357	2.71517	1.47928	1.35258	1.37125	3.13157
chr4:73311921-73318299	LOC100502924	3.32437	2.02181	2.76464	2.27099	3.00933	3.34874	2.87484	3.53246	2.89386	3.43829	1.99042	1.46087	2.81997	4.38544	5.55022	1.82645	2.44068	2.86473	3.91339	3.65372	3.19943	3.0623	2.82629	2.69656	3.89834	4.24946	4.19186	3.12998
chr5:147302938-147305708	Gm6370	3.70618	5.66656	3.25523	1.56645	7.02136	2.03069	7.15477	6.56776	2.38716	4.51858	3.24058	2.38206	2.18651	2.16345	1.58918	2.51286	3.30776	2.76009	2.4711	4.56856	1.38723	3.15709	4.65046	1.31196	1.01565	0.915843	0.87918	3.12497
chr14:8244986-8255199	4933406F09Rik	2.1378	3.05025	2.99051	2.02128	2.39298	3.14003	1.81358	2.2451	0.755723	2.44083	2.52274	1.5795	1.21615	1.79864	2.17344	2.08604	3.34156	2.29821	3.53221	5.9531	2.96795	4.64647	4.55601	5.23827	5.82331	5.79733	5.74493	3.12089
chr6:129994034-130017289	Klra4	2.47625	3.81599	3.26458	2.32511	3.94188	4.24835	2.55405	2.98781	3.2467	1.78894	3.95314	2.54228	4.46027	3.56986	2.9255	2.61914	3.06266	3.53497	2.11826	2.05528	4.3491	3.85291	2.31159	3.22536	2.3081	3.45042	2.80761	3.10356
chr6:129993749-130017276	Klra18	2.46505	3.80909	3.2578	2.31653	3.92095	4.23429	2.55619	2.98234	3.23497	1.80008	3.93698	2.54241	4.45715	3.5532	2.91756	2.62082	3.07202	3.52232	2.14602	2.04594	4.36305	3.83461	2.30905	3.23317	2.29011	3.42307	2.78318	3.09733
chr4:143309357-143319061	Gm13078	2.95836	3.20013	3.15795	3.23343	3.40651	2.93316	3.30769	3.30083	3.41312	3.42824	3.39703	3.69778	2.65124	3.96459	5.13006	3.62644	3.46994	2.62829	3.73747	3.4911	3.64354	3.46113	1.72633	2.59073	1.35792	1.35805	1.35262	3.09717
chr14:20413359-20421809	Gm5458	2.45957	3.33058	2.75196	1.92103	2.60352	2.032	2.49693	2.30579	1.54772	2.71613	4.0576	2.88276	2.60279	2.93253	3.90161	4.31608	3.16726	2.56127	3.13999	2.90608	2.97179	3.4532	4.14538	3.01965	4.27152	4.52625	4.35907	3.08815
chr7:16481472-16485648	Crxos1	3.0876	2.4586	3.19871	2.25672	5.96157	4.00304	3.17635	3.14778	2.11784	4.36458	3.19142	2.3419	3.18646	2.19032	3.15866	3.22506	3.10063	2.07881	7.96429	2.28154	4.11399	2.18881	2.08959	2.15818	2.16348	2.03158	1.92459	3.08008
chr19:34667377-34673917	Gm14446	2.11621	4.35781	3.0152	3.31206	1.87111	4.40923	3.11843	1.81795	5.46341	3.08664	2.13508	3.15896	3.12759	3.12049	2.03573	2.16936	3.15887	1.90545	4.3535	1.78555	4.3352	3.17128	3.02912	1.77159	4.26136	4.10184	2.91907	3.07808
chr17:30729806-30749604	Glo1	1.83393	2.90729	2.98572	1.96856	1.94064	1.84756	1.85024	1.81525	1.99177	2.84179	2.68484	1.7145	3.75479	1.85458	1.93442	4.73416	5.63973	4.70041	5.14688	5.49924	3.93282	3.80045	2.8101	3.69703	2.85201	2.87422	3.00444	3.0599
chr12:88855265-88859215	Gm8300	2.99811	2.43911	3.02914	5.73876	2.02048	3.10621	2.37112	2.83505	2.28957	4.43886	3.7108	2.77411	1.24678	3.83328	2.9544	3.45448	3.26242	3.39703	3.04328	3.30269	3.44237	2.03195	3.48905	2.84417	2.72827	3.04908	2.74646	3.05841
chr13:62231249-62275296	Zfp808	2.82341	2.25203	2.52121	2.55352	3.10057	2.88964	3.20541	3.03443	3.09294	3.31136	4.7016	4.57435	3.53778	3.58293	3.25224	3.26611	2.89946	2.57352	2.87951	2.95736	2.95964	2.60499	2.71081	2.91406	2.74313	2.76925	2.7446	3.05392
chr6:130065244-130079853	Klra8	3.0365	4.09463	2.30276	3.81493	3.58322	2.61436	2.64719	4.74158	2.41081	2.85912	2.3993	3.12155	3.07001	2.92697	1.72428	1.91149	2.14064	2.20071	2.16895	4.7162	1.78076	2.47914	3.95182	2.94203	2.76448	5.74738	4.29849	3.05368
chr6:130065243-130079916	Klra8	3.02823	4.09062	2.29831	3.81582	3.57665	2.6082	2.64672	4.73009	2.40864	2.85362	2.39629	3.11886	3.06577	2.9187	1.7283	1.90498	2.13956	2.19553	2.17052	4.70269	1.7844	2.4712	3.9399	2.9423	2.75462	5.72945	4.28592	3.04837
chr10:21832855-21869076	E030030I06Rik	2.58076	2.81551	3.44851	2.78279	3.94773	2.40726	3.39797	3.19958	3.01974	2.4784	1.92571	2.56411	2.60319	3.83667	2.80401	2.07267	3.11243	4.17653	2.97876	4.12426	2.44701	2.51739	4.06919	3.42843	3.18503	2.96076	3.38216	3.04691
chr12:88959817-88963905	BB287469	3.59504	2.75344	3.44026	3.84958	0.997215	4.12734	2.70397	3.08689	3.27535	4.29251	2.62187	3.76468	3.10108	3.34542	3.94055	3.45742	2.76924	2.66807	3.28253	2.90767	2.69997	2.25081	2.78182	2.75531	2.44004	2.42898	2.64365	3.03632
chr7:114966036-114966981	Olfr469	2.34647	2.46464	3.09542	3.40616	3.24256	2.74483	1.87076	1.89142	3.06865	2.82065	2.55627	3.20791	2.9303	4.21255	3.11872	3.30836	3.37359	3.5756	2.84267	3.06185	3.30106	4.08737	3.46159	2.81201	3.24924	3.23555	2.31198	3.02215
chr12:89558565-89560206	Gm5039	3.41553	4.34897	3.66402	2.67977	2.13591	4.34163	3.21909	3.10991	3.65528	3.39772	2.33551	4.10965	3.4947	2.87399	2.66598	2.85899	2.68867	2.58938	3.34105	2.40612	2.54568	2.0851	2.61619	3.48902	2.73874	2.28897	2.2371	3.01232
chr13:101051075-101086571	Naip6	2.23999	2.70391	4.09048	2.15465	2.15596	2.15675	2.812	2.30618	1.15368	4.18802	1.219	3.21907	1.19014	1.53476	3.43007	3.56893	4.81007	3.16021	2.50798	5.04799	6.45452	3.44732	5.8929	1.93647	2.69729	2.87905	2.20012	3.00583
chr17:13547437-13570089	Tcp10c	1.11954	1.87891	0.923002	1.71833	2.71814	2.35582	1.71538	1.75988	3.12624	5.03677	4.01084	3.24274	4.73589	4.23153	2.76103	1.65449	2.31134	2.45628	2.55723	2.28733	2.44437	2.30975	1.73464	3.87863	5.94757	6.08426	6.1451	3.00537
chr5:147313974-147316759	4930449I24Rik	3.21696	5.23693	2.46646	1.65665	7.15454	2.38433	6.39959	4.64753	2.30506	3.42442	1.72627	1.4678	2.88066	2.72576	1.62879	2.28465	2.54348	2.94353	1.32421	5.60111	1.8569	3.58935	6.57066	2.58529	0.654366	0.905415	0.93345	3.00423
chr4:145054112-145057864	Smarca5-ps	2.78441	3.35173	3.67357	3.41605	4.10486	3.25884	4.4502	3.34646	2.47656	2.79022	2.06915	2.15475	1.63406	2.68991	1.70697	2.54032	3.1038	2.82121	3.68754	3.1343	2.65168	3.05996	2.67799	3.54367	3.07542	3.29068	3.45485	2.99812
chr4:41812375-41813410	Gm13308	3.06709	4.58216	5.19849	3.93484	3.17935	2.57761	4.68391	5.28108	1.21674	1.87372	2.31387	1.69216	2.45808	1.72576	1.93941	1.70191	4.63839	3.60604	5.33151	4.69627	3.9314	3.1914	2.28291	3.20858	0.887933	0.650215	0.938087	2.99218
chr12:88959858-88963093	Gm4027	3.59857	2.66778	3.42341	3.924	0.96733	4.06017	2.63263	3.15308	3.19275	4.27486	2.52667	3.68912	3.08023	3.349	3.75327	3.19568	2.75834	2.55255	3.26499	2.8634	2.7524	2.18257	2.7744	2.67679	2.4053	2.41254	2.62339	2.99093
chr4:41812375-41813375	LOC100041579	3.05649	4.61367	5.17659	3.92033	3.19714	2.60953	4.6841	5.23625	1.20163	1.85569	2.29814	1.67217	2.44298	1.71377	1.91586	1.68236	4.59202	3.5484	5.37643	4.66162	3.96571	3.17715	2.27474	3.22076	0.872522	0.644363	0.93328	2.9831
chr17:6438149-6450142	Tmem181b-ps	1.0512	1.79893	1.37005	1.32469	6.79068	5.15241	1.72652	5.97224	1.74004	1.94673	1.69342	2.05811	1.50376	1.21211	1.29833	1.63487	4.32792	2.84126	7.23034	14.6719	1.98557	4.48567	1.85844	3.51547	0.253421	0.245008	0.248244	2.96064
chr6:124462638-124473458	C1ra	2.60139	4.11439	2.67886	4.12737	2.16289	2.21498	2.62718	3.9959	2.29575	2.27764	2.74283	2.08227	2.23392	3.00022	2.33894	2.21572	2.64416	2.79822	2.05783	2.02419	2.15608	3.46641	2.77983	4.72492	4.44608	4.70405	4.38355	2.9591
chr2:177757988-177770564	Etohi1	2.24515	1.89413	1.52418	2.97393	2.09798	1.1659	2.45701	2.19514	3.478	5.72881	3.77593	3.63018	5.17285	4.00468	4.2468	4.27137	3.14255	4.2341	3.75405	2.23148	1.3777	3.07252	1.25058	0.989565	2.9846	3.07844	2.82514	2.95566
chr4:88443140-88444108	Gm13279	3.39894	1.12257	3.33515	1.42887	2.68975	4.07251	2.72017	1.1906	5.89667	2.36333	1.43933	6.06176	1.54352	1.15745	2.55054	4.04274	3.42373	3.65245	2.52072	3.40263	5.16079	2.28	3.41755	4.96253	1.95871	1.91799	2.09065	2.95562
chr19:34667377-34676458	Gm14446	1.97986	4.01641	2.83598	3.26921	1.69216	4.19312	2.88622	1.60783	5.194	3.03233	2.1454	3.15987	3.16493	3.27198	2.17319	2.26076	2.9464	1.64413	4.23387	1.57019	4.211	2.92869	2.82615	1.53665	4.1196	4.08727	2.75729	2.9535
chr6:124480361-124492377	C1s	2.62723	4.29238	2.60714	4.45351	1.68414	1.98701	2.51665	4.33521	2.03025	1.72532	1.95959	1.08893	1.76341	2.51299	1.90855	2.03683	2.91354	2.9013	2.02277	2.01851	1.92169	3.99048	2.79315	5.92545	5.08911	5.19013	5.36483	2.95037
chr6:124480361-124492339	C1s	2.62796	4.28975	2.60417	4.45252	1.68163	1.98482	2.51134	4.33164	2.02953	1.72498	1.95984	1.08759	1.76373	2.51291	1.91056	2.03377	2.91161	2.89848	2.02302	2.01825	1.92115	3.98906	2.79192	5.92401	5.0867	5.19105	5.36436	2.94912
chr15:77464380-77473716	Apol11b	2.18221	3.09237	2.12013	2.38584	3.8783	2.77914	2.92441	3.89535	2.54509	2.12345	2.54798	2.80681	2.9014	3.88986	3.11508	3.49638	2.24178	2.94981	4.01248	2.14279	2.93357	3.06703	2.88706	3.87075	2.8416	2.9539	3.02277	2.94842
chr17:22684907-22710240	Vmn2r111	4.11187	4.07083	3.98073	4.05262	3.19862	2.98342	4.05906	2.10522	2.10115	2.10596	3.10753	3.13646	2.15198	2.47539	2.26866	3.21303	3.05665	2.96922	2.09521	3.10245	4.36625	2.06693	2.20798	4.04639	2.18686	2.22526	2.09238	2.94586
chr13:101053069-101087643	Naip7	2.1837	2.68764	4.05333	2.15848	2.1422	2.10667	2.75687	2.30039	1.13619	4.07258	1.20465	3.17498	1.15947	1.49898	3.3794	3.46262	4.67234	3.0886	2.44115	4.93291	6.35018	3.29957	5.73657	1.87841	2.6357	2.79834	2.18077	2.94417
chrX:3461360-3463320	Gm14345	2.49745	2.12896	2.66963	1.91035	2.24228	4.06845	2.58497	2.97754	3.42507	3.61275	5.54144	3.41571	5.62786	4.10158	6.72436	3.32261	1.86605	1.3113	1.95839	1.75961	1.50832	1.89257	1.9195	1.2224	3.50763	1.64219	3.64958	2.92921
chr1:21358411-21359824	Khdc1c	2.25398	1.87229	1.92387	2.62566	4.02995	2.84125	1.5662	5.48371	1.97332	3.59532	1.88928	2.07261	1.69535	3.28511	1.655	3.01046	3.31455	3.53691	3.97063	1.9455	5.37675	4.06632	3.3367	3.58457	2.94301	3.34951	1.87808	2.92874
chrX:3461369-3463320	Gm14351	2.49679	2.12592	2.66802	1.90882	2.23487	4.06514	2.58512	2.97679	3.42714	3.60974	5.53922	3.41237	5.62315	4.09763	6.72199	3.31775	1.86399	1.31122	1.95737	1.75777	1.50446	1.89237	1.91913	1.21974	3.50813	1.64132	3.65147	2.92731
chrX:3461371-3463292	Mgclh	2.49929	2.12367	2.66114	1.91777	2.2141	4.04939	2.57405	2.97073	3.4081	3.61103	5.54479	3.40995	5.62563	4.07671	6.72004	3.29739	1.86499	1.311	1.9444	1.76349	1.50821	1.89817	1.926	1.21898	3.49841	1.63603	3.65392	2.92324
chrX:3461371-3463275	Mgclh	2.50094	2.12269	2.65709	1.92354	2.20221	4.04006	2.56714	2.96707	3.39599	3.61225	5.54856	3.40892	5.62783	4.06425	6.71915	3.28541	1.8659	1.31087	1.93648	1.7673	1.51108	1.9018	1.93032	1.21888	3.4923	1.63286	3.65518	2.92097
chr6:128829478-128841142	BC035044	1.94067	2.06594	1.94475	1.97785	2.05354	1.86871	3.90586	2.03829	4.1412	6.07164	3.0454	2.00481	3.97969	6.03801	5.00488	4.79704	1.9817	2.08802	1.97008	3.93457	3.85308	1.94899	1.89934	3.12303	1.32846	1.96236	1.56254	2.90854
chr14:8156501-8164909	Gm5797	2.00207	2.41035	2.16477	1.89759	2.01539	3.93183	1.85703	2.09693	1.32164	3.29155	2.60451	2.28002	2.52538	1.88354	2.69783	3.16018	4.29224	2.36312	3.25625	5.22345	2.32818	3.26035	3.91709	4.8732	3.38098	3.46158	3.66992	2.89507
chr5:147337376-147340129	Gm3404	2.7838	2.48843	2.195	1.72145	3.44931	1.6273	3.27438	4.54614	1.65212	5.8211	2.43755	0.877145	3.95654	1.9177	2.20742	2.60188	4.11984	4.89321	2.4384	5.19584	2.82173	2.40672	2.56024	2.43737	2.62303	2.49771	2.43072	2.88822
chr6:131493779-131503775	5430401F13Rik	2.46483	2.4486	2.52022	2.7998	2.68043	1.75162	2.69389	2.61806	3.01285	2.971	2.57763	2.81691	3.48727	3.61972	3.05017	3.58675	3.02922	2.92061	2.89202	2.67327	2.66535	2.75751	2.82731	3.07863	3.66043	3.10067	3.23747	2.88675
chr7:110818616-110819543	Olfr624	2.64019	2.46098	2.6377	2.31356	2.90347	2.55908	2.4683	2.67048	2.39423	2.77741	2.86032	6.59961	2.82195	6.19812	2.72816	2.916	2.5686	2.97817	2.82604	2.72738	2.29144	2.49064	2.35027	3.0915	2.15081	2.10602	2.33558	2.88393
chr5:145803858-145806547	1700018F24Rik	3.16712	2.62864	3.17389	3.23039	2.3858	3.15302	2.54165	3.5023	2.83614	2.76264	3.16226	2.62462	3.45832	3.61451	2.60757	3.59583	1.99773	2.48866	3.18836	1.86744	3.35304	3.74318	3.16126	3.26884	2.26502	1.94225	2.08505	2.88169
chr12:105486105-105492615	Serpina3h	1.99586	1.82206	2.85678	3.78062	2.88754	1.99073	2.92948	1.98862	3.97325	3.8758	7.13101	2.19519	2.91612	4.04928	3.02912	4.05409	2.05253	2.05504	4.01299	2.15332	4.00112	2.00169	3.00178	1.89638	1.74686	1.67187	1.68329	2.87972
chr17:24035688-24037754	Dcpp2	3.16294	2.7988	2.80383	3.10054	2.21421	2.24997	3.10089	2.17566	3.24445	2.84962	2.76874	2.87766	3.35443	3.13744	3.56968	3.46663	2.93531	3.18026	2.11625	3.2382	2.89462	3.56125	2.94861	3.26525	2.31207	2.01855	2.27712	2.87493
chr4:3099229-3100150	Vmn1r2	2.37837	2.59495	2.80239	2.30954	2.5619	2.17548	2.63101	2.35698	3.18558	3.33072	2.7024	2.78037	3.07245	3.86941	3.32738	2.83545	2.37152	2.87041	3.1885	3.13339	2.88605	2.34017	3.05487	3.40128	2.58206	3.20813	3.52931	2.86963
chr7:11746991-11751497	Zscan4d	1.33999	2.05839	1.26133	1.2366	2.07516	2.05376	2.36171	2.30062	3.83182	2.91473	3.31241	2.95512	5.98094	5.92433	5.66484	3.67547	2.18826	2.04492	2.05594	1.99539	3.14297	4.23076	1.95075	4.22686	1.96882	2.27895	2.28927	2.86371
chr4:88437293-88438261	Gm13279	3.64559	1.15949	3.62962	0.877939	2.3361	3.73079	3.23073	1.33485	3.30577	2.35272	2.20952	3.79927	1.81789	1.22222	2.20005	5.24262	3.0303	2.59294	3.12015	3.35703	4.50271	2.09917	2.45296	3.23131	3.91988	3.5953	3.2594	2.86135
chr19:34658018-34663472	Ifit3	2.20179	3.11813	3.02123	2.95293	1.84333	3.54574	2.60603	1.91177	4.82271	3.51535	2.21223	3.08487	3.29979	3.29553	2.3557	3.22	2.77303	2.23534	3.20596	2.11948	3.19479	2.66137	2.65608	2.06239	3.06914	3.64709	2.55443	2.85875
chr17:35607033-35611508	H2-Q10	4.81398	4.61013	3.28919	3.30752	3.47401	3.42024	3.85933	2.5553	2.0064	2.25595	2.82127	2.36844	1.85371	2.11025	2.50341	2.09244	2.55586	2.80827	2.75976	2.3407	2.66289	2.90295	3.4711	3.50335	2.08191	2.21332	2.42828	2.85444
chr17:36392617-36394791	Rpp21	2.14126	2.12849	1.99346	2.08799	2.16708	3.21023	3.15362	1.9786	3.35969	1.90856	3.17978	3.16548	2.94561	4.67636	1.84868	1.90703	6.19241	1.99112	3.76426	1.88335	2.07503	4.11388	4.23417	5.00533	1.9124	1.71556	2.27561	2.85241
chr17:37123799-37126449	H2-M5	2.08123	1.90593	2.03779	1.9054	5.70813	6.89076	2.06273	5.8846	2.13361	2.22035	1.98465	2.35381	1.97945	1.90498	2.14182	2.21334	2.18055	2.03268	10.2612	1.99569	2.03848	1.89163	2.85346	1.951	2.21926	1.97414	2.2006	2.85212
chr1:90203286-90285426	Trpm8	2.62556	2.85859	2.36186	2.65839	2.25446	2.51236	2.48552	2.91615	2.7955	2.91581	2.71151	2.57592	3.69959	3.73208	3.21316	3.9237	2.79999	2.58905	2.28393	2.97747	4.22249	2.68476	2.47642	2.66697	2.57006	2.81998	2.61441	2.84984
chr7:48242978-48250203	4930433I11Rik	2.83707	2.77434	2.62417	2.66219	3.03765	2.46285	3.10681	2.75063	2.52071	2.29208	3.89329	2.66198	2.52253	2.85367	4.18376	2.60131	2.87466	3.17324	2.52043	2.98164	2.72014	2.79893	3.10087	2.6655	2.65522	2.91345	2.65717	2.84616
chr5:11918042-11922804	4933402N22Rik	1.93391	2.7545	3.33274	3.34841	3.19772	3.24707	3.11921	1.50963	3.98278	3.08244	2.57328	4.38537	3.46715	4.10031	3.23882	2.9504	2.81242	1.06083	2.97716	2.01	2.35795	2.27037	4.06502	3.73591	1.48146	1.68136	2.13188	2.84474
chr5:147293518-147296278	Gm6408	6.09474	3.35511	3.53643	1.70364	4.59036	2.163	4.06166	5.3408	3.01228	3.91428	2.90464	1.81199	3.06183	3.37126	2.05203	2.72113	2.6476	2.52717	1.8733	3.24325	1.42114	2.67714	4.1044	2.13802	0.656833	0.916454	0.840447	2.84226
chr17:23596641-23616564	Vmn2r117	3.10875	2.81427	2.64458	2.70845	2.87509	2.85854	2.58165	3.56214	2.34334	3.17038	2.64604	2.58743	2.86517	3.96507	3.13423	3.42299	2.66709	2.75697	2.35489	3.27791	2.7478	2.95215	2.60716	2.9715	2.33049	2.38661	2.33927	2.84
chr6:130168848-130183340	Klra7	1.02957	2.73267	1.85566	1.87083	3.11682	3.39632	2.12232	2.50386	2.88798	2.70027	2.69602	2.49885	3.43684	5.58175	1.67747	1.16206	3.08659	2.75003	2.37036	2.68039	3.09993	3.66744	2.47252	2.51038	3.19772	5.19977	4.25897	2.83568
chr17:37079995-37084931	Rnf39	1.98376	2.08435	1.91092	2.186	5.23711	8.01074	1.97805	5.55516	2.2186	2.05188	2.08577	2.03729	2.15329	1.80603	2.29914	2.00313	2.16759	2.16526	9.51697	2.10238	2.00498	1.78857	2.85709	1.9616	1.98122	2.17056	2.18031	2.83325
chrX:31349046-31350997	Gm2863	2.70621	1.85634	2.53201	2.15432	2.65532	4.2816	2.65653	2.63374	3.01274	2.97962	5.23773	3.17589	4.99273	3.17985	6.75881	3.45614	1.7881	1.31235	2.17431	1.7887	1.52952	1.88194	1.97129	1.40989	3.15858	1.54202	3.64756	2.83236
chr2:10403387-10403474	Mir669a-10	4.2849	4.60689	2.48459	2.29424	2.10584	3.94679	2.15222	2.90351	3.09372	4.57541	2.22046	3.46877	3.11621	3.55345	2.19548	3.27489	1.44912	3.45953	2.34628	2.29169	2.12086	1.97671	2.57998	1.91712	3.0372	2.43758	2.56191	2.83168
chr2:10403383-10403480	Mir669a-1	4.24161	4.62779	2.50258	2.29424	2.10051	3.94679	2.14126	2.91814	3.0838	4.52882	2.20591	3.44908	3.12708	3.55345	2.19548	3.27489	1.44912	3.45953	2.34628	2.30126	2.12177	1.99362	2.57745	1.91578	3.0372	2.43758	2.56191	2.82937
chr2:10403381-10403476	Mir669a-2	4.19443	4.64165	2.51649	2.29424	2.09258	3.94679	2.12789	2.92827	3.07016	4.47809	2.18902	3.42559	3.13332	3.55345	2.19548	3.27489	1.44912	3.45953	2.34628	2.30736	2.11979	2.00717	2.57157	1.91194	3.0372	2.43758	2.56191	2.82488
chr14:4974180-4978876	Gm3264	1.98985	1.9379	2.39783	2.20157	2.5045	2.02381	2.0823	2.26532	0.60369	1.97901	2.64503	2.0038	1.70208	1.42432	2.17527	3.15495	3.03022	1.94949	3.27826	4.228	2.6162	3.68962	3.51986	4.19281	5.55178	5.57978	5.44667	2.82126
chr17:31345010-31379348	Ubash3a	1.9626	3.04628	2.49526	1.9979	2.4432	1.76804	2.48688	2.51061	2.58987	4.44613	3.65882	2.83414	2.57825	2.73311	3.27995	3.1136	3.04225	3.14806	3.42907	3.08138	1.89679	1.97214	2.57459	3.11127	2.73673	2.87777	4.28451	2.81849
chr6:116490472-116491456	Olfr213	2.86263	2.99823	2.53242	3.27764	2.67825	2.60814	3.16483	2.68407	2.45912	2.7069	2.45731	2.77946	2.92613	2.5998	2.74037	2.89852	2.21063	2.54711	2.81429	3.10975	2.65367	3.41918	3.40514	2.42129	2.53844	3.59828	2.97353	2.81723
chr11:116613480-116619197	BC018473	3.08025	0.989144	2.89738	2.02761	1.73998	2.01303	1.05422	5.95915	3.12121	9.88226	1.04041	3.06589	3.94853	8.98019	3.14155	2.46694	1.99215	2.09304	3.16253	1.00637	2.02455	0	2.93921	0	2.02159	2.12687	2.93034	2.80387
chr12:89131277-89135166	Gm2022	2.66794	3.68512	2.77819	2.2315	1.70351	2.77441	3.02534	2.6799	2.73297	2.77371	1.83252	2.71176	3.35685	3.69647	4.55054	1.80981	2.98173	2.79974	2.9997	2.75503	2.76329	2.75859	2.87106	2.83014	2.67782	2.73745	2.48059	2.80243
chr7:68880422-68880488	Mir344e	3.84891	2.24609	2.63701	2.27267	1.64073	2.85144	1.76796	2.3564	4.15377	1.41434	3.50801	3.61981	1.8581	4.694	2.54295	3.73524	1.54793	3.04728	2.07236	3.31704	3.9092	1.80665	4.13137	2.90446	2.18103	2.33198	3.21231	2.80033
chr3:93740554-93747465	Gm9125	2.28352	2.28831	2.22778	2.26647	2.6945	2.15162	2.42334	2.67195	3.52216	2.42886	3.29402	4.57233	1.96862	3.71572	3.64365	1.529	3.44132	2.84243	2.23983	4.32375	1.34406	3.89256	2.65158	2.22114	2.88837	3.34887	2.65354	2.79738
chr3:93851902-93858807	Gm9125	2.11965	1.73528	2.1132	2.01587	3.03483	1.62231	2.40122	2.60876	4.03072	2.85212	3.39526	4.93683	1.96652	3.55719	3.80861	1.7265	3.31353	2.51372	1.78352	4.96308	1.10983	3.66583	3.07928	1.76686	2.91953	3.62902	2.85929	2.79735
chr17:13714321-13721300	Smok4a	2.75657	5.02539	7.9001	2.76183	3.64904	3.38634	1.94286	3.52236	1.83224	2.93266	2.6152	1.7481	1.89361	2.05843	2.0187	2.02386	2.01795	1.93466	3.47455	2.82536	2.05624	1.82544	1.8138	1.97829	3.71536	2.89723	2.82079	2.79359
chr6:130168622-130181705	Klra7	1.0352	2.69541	1.80493	1.81988	3.08266	3.35543	2.01943	2.55601	2.8563	2.59799	2.629	2.536	3.36704	5.62019	1.63855	1.08967	2.98891	2.72243	2.23252	2.75697	2.92908	3.62964	2.53933	2.43685	3.08735	5.14361	4.18377	2.79089
chr5:138667131-138693103	Nxpe5	2.34792	2.45941	2.27456	2.28391	2.43125	2.51003	2.19782	2.62637	2.93493	2.57824	2.2731	4.98151	3.18255	3.20565	3.20342	5.18201	2.77806	2.82339	2.6253	2.8797	2.27804	2.54501	2.66349	2.59444	2.62873	2.05681	2.34773	2.77383
chr12:89080291-89085164	Gm16381	3.09048	2.67472	3.05168	3.84285	2.14047	3.6454	2.56984	2.9714	2.4783	4.16498	2.36396	2.99149	2.97339	2.36333	3.49929	3.08606	2.5682	2.77208	2.54855	2.69573	2.5198	1.86553	2.67387	2.06586	2.26341	2.4338	2.45535	2.76925
chrX:3410667-3412627	Gm14345	2.3482	2.07476	2.64176	1.91076	2.85661	3.91375	2.70288	2.77503	3.14555	3.12601	5.60574	3.4263	4.90703	3.74903	7.05996	2.81606	1.41876	1.15728	2.22826	1.7514	1.19655	1.57836	1.74462	1.32231	3.03315	1.45268	2.77318	2.76726
chrX:30291071-30293031	Gm10921	2.32607	2.08903	2.58066	1.83008	2.27693	3.78777	2.59932	2.77388	3.37231	3.51422	5.06764	3.05167	5.38697	3.87621	6.71368	3.33188	1.54827	1.12657	2.11355	1.60545	1.19278	1.74192	1.79337	1.26793	3.05935	1.65203	3.01009	2.76628
chrX:30291080-30293031	Gm14351	2.32459	2.09035	2.58149	1.82818	2.27446	3.78136	2.59946	2.77488	3.37131	3.51372	5.06441	3.04828	5.38736	3.87367	6.70691	3.32812	1.54664	1.12561	2.11267	1.60668	1.1947	1.7445	1.79394	1.26968	3.05956	1.65422	3.01078	2.76546
chrX:3410667-3412618	Gm14351	2.34668	2.07707	2.64018	1.91005	2.85547	3.91054	2.70161	2.77353	3.14206	3.12425	5.60468	3.42528	4.90733	3.74208	7.04875	2.81245	1.41449	1.15601	2.22924	1.74835	1.19521	1.57483	1.74507	1.32317	3.0327	1.4492	2.76968	2.76518
chr4:143538484-143540919	Gm13109	3.16655	2.15727	2.0139	2.90253	2.45747	1.75017	2.05095	2.34995	3.04536	3.26701	3.28748	3.29089	3.61064	3.56625	4.28943	3.06529	2.23232	2.86151	4.622	2.90241	1.64204	4.15467	3.50909	2.69363	1.12341	1.28596	1.35449	2.76491
chr17:34938292-34941371	Cyp21a1	2.83229	2.39769	2.45732	2.70537	2.06056	2.19321	2.72819	2.47982	2.76249	3.93779	2.27133	2.71307	2.94727	3.15185	2.72605	3.11355	1.78111	3.14344	2.99089	2.84459	2.68467	4.34922	2.51638	2.88997	2.82645	2.42418	2.57015	2.75922
chr17:23427900-23449280	Vmn2r114	3.02114	2.70419	2.45848	2.6237	2.76351	2.75773	2.27461	3.54013	3.09014	3.44121	2.38609	2.71591	2.44558	4.09302	2.88157	3.21006	2.59563	2.57294	2.3179	3.39125	2.41218	2.82951	2.39161	2.82457	2.23494	2.2489	2.23167	2.75771
chrX:30291082-30293003	Mgclh	2.31533	2.08555	2.56293	1.83734	2.27337	3.74922	2.57606	2.76596	3.352	3.52062	5.06186	3.03095	5.35941	3.86409	6.70569	3.31987	1.54838	1.12355	2.11216	1.60064	1.18141	1.74134	1.79597	1.26457	3.05654	1.64965	2.98407	2.75698
chr19:40164168-40166823	Cyp2c50	2.81056	2.58449	2.50078	2.64827	2.52827	2.56711	2.80379	2.65825	1.84076	1.92425	2.02771	1.95357	2.22961	2.30872	1.90931	2.02757	4.58546	3.60077	4.65459	3.20126	3.40446	3.48491	3.31983	3.33775	2.1315	3.31319	2.04818	2.75574
chr7:9744079-9759858	Vmn2r44	2.77586	4.8765	2.41967	5.01229	5.56471	2.24566	2.90236	4.18553	3.77266	3.64741	0.357814	1.06692	4.48535	4.96916	0.995812	1.64658	0.304068	1.68912	2.07436	0.255396	0.378519	0.449525	0.283549	0.264009	5.92514	6.01023	5.81639	2.75461
chrX:30291082-30292986	Mgclh	2.31308	2.07807	2.55204	1.84216	2.27304	3.7472	2.57433	2.7621	3.35065	3.52497	5.06071	3.02578	5.34515	3.85677	6.70091	3.31737	1.54485	1.11911	2.11355	1.59731	1.18026	1.73745	1.79173	1.26053	3.05464	1.6465	2.96736	2.75325
chr2:177631867-177662555	Gm14327	2.3819	1.92599	0.751605	1.99682	2.48607	1.55856	1.66095	2.25083	3.13433	3.41904	4.06247	3.57375	2.66638	3.38181	4.23465	3.94808	2.9649	4.49316	3.90714	2.66644	2.78332	2.93373	1.53933	1.22323	2.86743	2.78588	2.73901	2.75321
chr17:23480943-23497095	Vmn2r115	2.9869	2.69286	2.45687	2.61567	2.56881	2.74112	2.43207	3.62267	2.51351	3.20196	2.38306	2.52341	2.36583	4.0605	2.91969	3.37677	2.74389	2.64575	2.14516	3.48528	2.70596	2.83663	2.49997	3.03652	2.21217	2.30011	2.09483	2.74696
chr6:128837631-128846866	Clec2i	1.66377	2.11555	1.59757	2.10097	1.54232	1.42694	4.4033	1.76573	4.85837	6.30567	2.21952	2.03729	3.11998	5.84561	3.35555	4.04023	1.92724	2.37286	1.89655	4.5021	4.34188	1.14588	1.70616	3.35142	0.824092	2.2399	1.39465	2.74449
chr7:7264984-7290204	Vmn2r30	1.72292	3.23165	1.95406	2.79272	3.45774	1.61251	1.78618	2.78707	2.83839	3.23308	2.43863	2.52986	3.9247	4.34213	2.75162	3.13858	2.09731	2.46865	2.25547	2.10108	2.18032	2.20027	2.10928	2.25607	3.89083	3.95643	3.96147	2.74145
chr7:111207169-111208114	Olfr643	2.97151	3.19803	3.15413	2.75613	1.84166	2.62125	2.8552	2.91804	2.58455	3.00906	2.54939	2.84768	2.31439	2.72813	2.61712	2.88109	2.1332	2.60831	1.99832	3.92977	4.3167	2.5558	3.78561	2.28029	2.36976	1.90125	2.25438	2.74003
chr2:177757988-177767215	Etohi1	1.9214	1.83731	0.634254	1.98805	2.17342	1.10835	2.33199	2.07464	3.60913	5.7935	3.61506	3.36997	4.91095	4.10849	3.76499	4.15557	2.83614	4.04359	3.30101	2.02918	1.43541	2.74783	0.959641	0.765421	2.84392	2.89496	2.67382	2.73807
chr13:50848761-50860617	4930518P08Rik	3.06145	3.25044	3.00946	2.24574	3.1649	2.06911	4.11054	1.28324	4.20607	2.33624	1.28638	2.33599	2.35553	3.46241	0.221407	3.38894	3.2789	3.32754	2.30627	2.27057	2.3711	2.29034	3.23476	2.35424	4.1292	3.32028	3.232	2.73715
chr4:73296797-73303176	LOC100502924	3.10087	1.9321	2.28304	2.05063	3.05444	2.97427	2.9684	3.43635	2.06591	2.72122	1.45785	1.09745	2.11094	3.38102	4.46825	1.75035	2.69561	2.94213	3.94233	3.38147	3.58362	3.08533	2.59132	2.33822	2.72599	2.84963	2.81882	2.73361
chr7:55236163-55237666	Mrgpra4	3.01702	3.39448	2.95753	2.91033	2.81213	2.79893	3.14944	2.90275	2.39385	1.92845	3.34747	3.58508	2.02924	2.50045	2.85923	2.90524	3.24696	2.97243	3.51834	2.01718	1.93299	2.15975	2.5933	3.69566	1.91137	2.07371	1.86493	2.72142
chr17:17201066-17226595	Zfp960	3.20965	2.57315	2.59371	2.4249	2.6956	2.16367	2.88295	1.82998	4.61639	2.47209	1.80451	2.46409	3.1537	5.18637	2.66246	2.57998	2.09791	3.25773	3.30479	4.87658	1.35335	3.43599	1.30701	3.73673	1.38295	2.00644	1.21848	2.71449
chr17:37085299-37088737	Ppp1r11	2.04188	1.96082	2.24551	2.19456	5.12327	7.04042	1.92857	5.02348	2.19596	1.87506	1.99965	2.11418	2.04458	1.67872	1.94994	1.92911	2.0182	1.95983	8.0734	2.07529	1.96163	2.00122	3.07186	2.0924	2.04053	1.77861	2.17305	2.68858
chr17:37095536-37102568	Znrd1as	1.86434	2.15741	2.08608	1.9172	5.55753	7.34171	1.96966	5.45741	1.97048	1.86929	1.83177	1.85368	1.81393	1.79115	1.97305	1.90861	1.88865	1.92584	8.7056	1.95611	2.0156	2.07126	2.69408	1.82832	1.89812	1.92012	1.90668	2.6731
chr7:7416679-7432684	Vmn2r32	2.22354	4.48506	2.34035	3.91518	4.59812	2.85612	2.26436	3.77145	3.32695	3.51098	2.11317	2.96359	3.01515	2.95148	2.99084	2.68349	0.870382	2.04586	2.61341	0.869351	1.02206	1.10221	0.897575	0.919677	3.795	3.75293	3.72242	2.65262
chr2:177801582-177813130	Zfp931	2.36353	2.26257	2.60286	2.89937	1.77319	1.83225	2.30812	1.98894	2.45403	3.1684	3.63004	3.32289	3.11121	2.70575	4.28716	3.35781	2.87595	3.31688	3.49301	1.70237	2.83676	2.91283	1.13519	0.852435	2.67019	2.84536	2.83619	2.64983
chrX:31750515-31752466	Gm14351	2.38116	1.90728	2.4804	1.80941	2.28036	4.00716	2.56926	2.37555	2.90585	3.10153	5.3186	2.96106	4.69009	3.31162	6.21899	2.88366	1.6873	1.2105	2.30579	1.78237	1.4334	1.48575	1.81463	1.28944	2.70886	1.48838	3.12278	2.6493
chrX:31750506-31752466	Gm2913	2.37733	1.90567	2.47641	1.81078	2.28028	4.00349	2.56592	2.37305	2.90167	3.10385	5.3195	2.95634	4.6832	3.30749	6.22208	2.88682	1.68887	1.21183	2.30641	1.778	1.43174	1.48571	1.81023	1.28955	2.70499	1.48632	3.12125	2.64773
chr17:13397907-13399077	Gm10512	0.172214	0.252465	0.172828	0.928976	1.01866	1.21599	0.146521	1.28594	3.24599	3.31323	4.93347	4.35671	4.68745	5.26408	3.00553	2.41609	2.15011	2.06361	1.98201	2.25446	2.20155	2.55038	1.59511	3.5184	5.02301	5.82879	5.86621	2.64629
chr17:35457502-35462044	H2-Q1	3.47373	4.27915	2.46313	2.67032	1.88062	1.93743	1.70857	1.69986	1.69442	3.09341	2.26155	3.32933	2.62048	1.63258	5.03263	2.26456	2.69277	5.21547	4.17406	1.47385	1.97343	1.23528	2.73064	0.896322	2.80553	2.99125	3.09079	2.64152
chrX:31750733-31752434	Gm2933	2.4359	1.90351	2.50109	1.76535	2.24963	4.08934	2.53553	2.40019	2.82134	3.04708	5.23162	2.96808	4.5957	3.38853	6.11118	2.79416	1.64357	1.17074	2.29643	1.80484	1.41032	1.48894	1.8698	1.28071	2.79686	1.53438	3.16016	2.64055
chr13:50793697-50798778	Gm8765	1.60468	2.46283	2.0014	2.74672	2.71296	1.42916	3.03253	2.57639	2.57205	2.58085	2.16975	3.0764	4.04094	2.24645	3.46067	3.73262	3.02724	2.455	2.68075	2.6777	2.03317	3.5251	2.83892	2.14902	2.61803	2.38633	2.32999	2.63584
chr1:179921565-179978422	Gm16432	2.43634	2.43646	2.41938	2.41764	2.62919	2.25219	2.49228	2.48709	3.34398	2.56214	3.54482	2.52781	2.55566	4.83341	4.57813	1.67092	2.5188	1.851	2.43124	2.46431	2.44725	2.50513	2.53577	2.38128	2.27925	2.20434	2.23328	2.63108
chr17:37091302-37095373	Znrd1	1.97457	1.90316	2.13342	1.97691	5.17328	7.54385	1.83364	5.16318	1.84767	1.94202	2.00829	1.92958	1.84529	1.6388	1.85737	1.8911	1.8731	2.1453	8.51602	1.89295	1.91028	1.88964	2.70126	1.96925	1.69258	1.92942	1.80682	2.62921
chr4:88443300-88443849	Gm13285	3.11484	0.893187	3.17726	1.23579	2.26671	3.97039	2.49024	0.862205	4.37122	2.41866	1.4609	4.59195	1.61144	1.01829	2.34678	3.91411	2.90152	3.62669	2.09693	3.41602	4.31402	1.92109	3.09102	4.62907	1.77627	1.66163	1.71912	2.62583
chr7:19059930-19069498	Psg26	3.18203	2.30533	2.27813	2.14539	3.28005	2.1042	4.46366	2.31126	2.20659	3.39653	2.19025	2.32965	3.14532	3.6201	2.23236	3.53022	2.20992	2.30786	2.20235	2.34825	3.44983	2.25881	2.26089	2.41149	2.11105	2.29841	2.31645	2.62579
chr12:20810252-20821640	1700030C10Rik	2.24217	2.27259	2.21047	2.23665	2.2631	2.01621	2.30185	2.18934	4.04883	2.43841	3.18469	2.23887	4.0573	4.0477	5.53417	4.22823	2.26741	1.15947	2.26337	2.2506	2.19435	2.25687	2.26199	2.09264	2.11955	2.22351	2.25061	2.62411
chr18:3122491-3123412	Vmn1r238	2.72068	2.86174	2.28055	2.66627	2.4063	2.54109	2.386	2.60757	2.15635	2.9053	2.61907	1.98011	2.49839	2.7916	2.84306	2.86338	2.74771	2.5552	3.33127	1.98255	2.25884	2.53132	2.73055	2.47631	2.85509	2.5912	3.56204	2.62035
chr17:35400038-35404442	H2-D1	2.55152	3.84287	2.06572	2.13753	2.2876	2.1283	3.30761	2.29109	2.80956	2.21921	3.89651	4.17686	1.70732	2.48104	4.60485	3.36354	3.12734	3.65652	4.24837	1.78297	2.68592	1.92358	2.07204	2.80697	0.819685	0.869919	0.878206	2.6201
chr9:88979461-88987673	Trim43b	3.11784	2.19918	2.41342	2.32278	2.30818	4.50495	2.5639	2.38617	3.9579	4.95872	3.94538	2.14534	1.55779	4.22951	2.49368	3.62405	2.26751	2.11169	1.87583	2.16059	2.82462	2.28191	1.95582	2.26142	1.18825	1.1867	1.75832	2.61487
chr17:7229891-7291946	Gm1604b	3.41297	3.28683	3.03249	2.5636	2.15999	1.70984	2.84844	1.66216	2.88448	2.33126	2.99832	2.88217	2.08244	2.43655	2.16363	3.71693	3.08488	2.76109	1.36851	3.78096	2.23451	2.54517	3.3631	2.68966	2.30233	2.10471	2.10033	2.61138
chr8:13835230-13838089	AF366264	2.7144	2.55892	2.58094	2.68488	2.76042	2.57303	2.42394	2.95638	2.76206	3.14236	2.59318	2.74133	2.66508	3.42967	2.95194	3.14519	2.54221	2.40889	2.26307	2.35143	2.57765	2.39548	2.23551	2.41101	2.2932	1.85546	2.48223	2.61111
chr4:88433880-88435342	Gm13277	3.97927	1.09561	3.72189	0.989493	2.48978	3.50988	3.76317	1.68433	3.09315	2.17432	1.55424	2.99024	1.35448	1.22747	1.8257	4.25806	4.15464	2.87418	2.83243	2.49827	4.68688	2.0533	2.08526	2.38517	2.22562	2.35199	2.61653	2.6102
chr6:128612402-128627392	Clec2h	3.56053	3.5269	3.46813	3.54667	2.80481	3.4782	3.49042	2.76959	1.80694	1.95011	2.99382	1.82144	2.0135	2.18144	3.13811	1.92099	2.02159	1.92925	2.0505	3.50821	2.869	1.93234	2.85058	2.81867	2.04041	1.93485	2.01175	2.60884
chr5:23216793-23216894	Mir3096	1.58699	2.70599	3.06236	2.46317	1.72792	2.77075	3.15529	3.16285	1.96637	1.19972	1.64555	1.91754	2.85806	2.15326	2.80394	2.9144	2.1177	2.34286	3.02503	2.36483	2.58621	2.86034	2.26304	2.64108	3.90399	3.62805	4.5082	2.60502
chr3:88181657-88182621	Bglap2	3.63656	4.0837	2.84049	3.35812	3.688	2.40645	1.49549	1.46373	2.98391	1.21642	1.93218	3.99514	2.27338	4.66183	5.11771	1.06634	0.107711	4.38228	1.87272	1.64281	1.57834	1.72221	1.81936	1.799	3.24995	2.89915	2.88147	2.59905
chr6:123559775-123600653	Vmn2r22	3.99191	2.50481	3.77854	2.84934	2.76562	0.345727	1.70727	2.95004	2.1734	1.84733	3.97948	3.34441	1.35162	3.95995	4.06693	2.8716	2.29973	1.72837	2.04682	0.691256	1.4488	4.32192	2.3586	2.01463	3.21488	2.37015	3.18125	2.59868
chr19:61300304-61304321	Csf2ra	2.32127	2.62569	2.81822	2.86377	3.07257	3.45949	2.45197	2.62209	2.44698	2.11677	2.13221	2.78355	2.28716	3.01298	3.36292	2.53319	2.38888	3.45507	3.13667	3.17341	2.51306	2.50131	2.4502	2.57895	1.72992	1.64063	1.56249	2.59413
chr14:56560287-56563498	Cma1	3.94857	4.03664	2.99214	3.93335	4.13537	2.72905	4.07503	4.35953	2.03593	2.07169	2.18681	2.01164	1.94567	2.21961	2.144	1.78712	2.19182	2.05837	2.2794	2.2838	2.15975	2.14792	2.21529	2.05149	1.97732	1.96039	2.02075	2.59105
chr10:127213460-127229753	Rdh9	2.52547	2.50952	2.41726	2.56149	2.52346	2.41184	2.53404	2.51378	2.70711	2.80572	2.64036	2.68686	2.77972	3.30577	2.93533	2.87481	2.44507	2.3937	2.51104	2.48228	2.51258	2.48542	2.41825	2.45514	2.50971	2.4312	2.51359	2.58854
chr14:36908150-36910041	4930474N05Rik	2.05636	2.61637	2.20116	1.83608	2.43258	2.30817	2.91031	2.35632	3.32583	2.4845	3.26744	2.91747	3.06697	4.03134	3.11677	2.41568	2.50944	2.00797	2.20031	2.22072	2.76949	3.32497	2.36779	2.57801	2.04482	2.33986	2.10211	2.58551
chr13:13088390-13097597	Prl2c2	3.78418	0.00499282	3.13932	5.80747	0.0167809	7.51389	0.0253336	0.0114666	2.0929	1.10251	2.13637	1.12477	2.51502	1.99506	1.10945	1.8512	2.03278	3.51762	4.12182	3.11552	1.78154	2.0946	3.49264	0.00338291	3.68519	3.29014	8.43505	2.58522
chr5:11749832-11769308	1700003C15Rik	2.41797	1.64855	2.57259	2.38802	1.82709	2.85448	2.08049	2.78849	3.13273	3.19538	2.92087	2.6935	4.91942	4.02269	3.66386	4.26741	2.27414	2.01465	1.80408	1.22277	0.74867	1.25833	2.26289	1.48528	3.66687	3.58932	1.90389	2.57868
chr14:4534030-4622491	Gm3264	1.2285	2.08396	2.4943	1.68164	2.40645	1.28733	1.59797	2.51861	0.869415	2.62324	2.31152	2.36578	1.87889	1.42528	2.57798	2.84492	1.8881	2.5491	2.90448	3.19794	2.40868	2.54458	3.11961	4.10056	4.78577	5.00199	4.92048	2.57841
chr7:29618812-29626722	Lgals4	2.49732	2.51207	2.98726	2.54289	2.15329	3.53179	2.53006	2.9717	3.19748	2.67865	2.59445	3.14033	2.02313	2.58343	2.05382	1.85668	2.06599	2.6499	3.14268	1.90883	3.17555	1.92512	3.10809	1.90152	2.75927	2.70084	2.3254	2.57472
chr17:36175353-36179647	H2-T22	3.12297	3.05319	1.48885	2.31873	3.05793	3.44838	2.78652	2.78048	2.18425	3.37992	2.02764	2.11346	2.22747	2.58963	2.76461	2.19457	2.65123	2.60377	2.47527	1.83321	1.92484	2.78366	1.52767	2.19497	3.20368	3.03075	3.73545	2.57419
chr17:36175353-36179637	H2-T9	3.12146	3.05197	1.48952	2.31975	3.0581	3.4456	2.78715	2.77953	2.18243	3.3816	2.02701	2.11238	2.23005	2.5919	2.7609	2.19427	2.6517	2.60468	2.47597	1.83176	1.92444	2.78633	1.53113	2.19729	3.20239	3.02954	3.73226	2.57412
chr17:6310544-6317474	Dynlt1a	1.63726	1.97967	1.62682	1.96699	5.76551	4.86251	1.99393	5.91477	2.08569	2.35997	3.01111	2.63942	2.50204	1.73828	1.69241	1.8518	1.97925	1.92378	6.18933	2.87171	1.84903	1.77951	1.76744	2.09202	1.87993	1.76165	1.73682	2.57254
chr15:75258035-75262259	9030619P08Rik	2.23284	2.27154	2.07698	2.1063	2.19013	2.25953	2.2014	2.1308	4.54609	3.18625	3.19623	3.17723	3.39351	3.35422	3.52156	3.14935	2.24465	2.25857	2.04287	2.21389	2.26215	2.12074	2.22473	2.2334	2.1779	2.23182	2.45169	2.57246
chr17:35400067-35403675	H2-L	2.42581	3.73657	1.90857	2.02776	2.25768	2.0783	3.35235	2.25204	2.78951	2.15785	3.72665	4.33527	1.70483	2.46146	4.65992	3.2674	3.05953	3.50732	4.07241	1.7075	2.6188	2.14913	1.99552	2.60663	0.821004	0.835388	0.889047	2.57053
chr5:146585558-146617450	Cyp3a44	2.45058	2.48788	2.57422	2.38974	2.56326	2.34177	2.5285	2.54826	2.62249	2.72673	4.68721	2.65991	2.73043	3.05609	2.83418	2.79492	2.32143	2.28567	2.36237	2.32351	2.29081	2.37619	2.33431	2.288	2.18261	2.29994	2.30572	2.56914
chr5:23215834-23218485	AI506816	2.6058	2.85497	2.63363	2.6572	2.31123	3.05523	2.89087	2.82873	2.80627	2.03591	2.49162	2.54464	2.48354	2.38087	2.61728	2.56841	2.40548	2.6802	2.66166	2.84477	2.8165	2.58918	2.54824	2.51925	2.26766	2.07609	2.15831	2.56791
chr13:62618156-62659959	Zfp934	2.61449	2.34249	2.39798	2.49819	2.90516	2.65196	2.81537	2.83531	1.94695	2.49668	2.89712	2.70173	2.15858	2.72528	2.07055	2.14666	2.66187	2.49683	2.69141	2.72261	2.65714	2.59426	2.55913	2.7183	2.67028	2.64396	2.57195	2.56268
chr3:92761311-92762496	Gm9782	1.72209	2.8227	1.85583	1.93743	2.78581	1.9996	1.84218	2.69514	2.77659	2.73465	2.12592	1.8421	2.07984	2.61859	1.78802	2.10184	2.10451	3.44488	5.29682	4.04582	1.79322	3.06079	2.54761	3.69272	2.67948	2.36771	2.41383	2.56206
chr17:13414053-13420524	Smok2a	0.033508	0.0561736	0.0861836	0.993189	1.34636	1.1345	0.051772	1.24455	3.01584	3.34236	5.06915	4.03197	5.11879	6.08096	3.18332	2.18859	2.10058	1.95421	2.22294	2.01679	2.1047	2.11511	1.07904	3.88435	3.86053	5.32549	5.35466	2.55539
chr10:78379586-78380681	Olfr1354	2.39262	1.99243	1.71397	3.44201	2.68621	2.67973	2.35531	2.04704	2.32428	2.38861	2.31778	2.67524	2.48259	2.80715	2.11292	2.48347	2.92825	2.79236	2.5896	3.07711	3.1104	2.27633	2.47437	2.9048	2.39534	2.98104	2.41563	2.54987
chr17:40430706-40456156	Crisp1	2.56282	1.97264	2.52167	2.49245	3.18995	2.49545	3.1643	2.54036	2.5769	2.70324	2.7127	3.31054	1.92711	2.68446	1.8907	2.57765	3.17652	2.03271	1.96707	3.14451	2.62606	3.07225	2.53956	2.61026	2.13144	2.05519	2.09305	2.54709
chr7:29619200-29626652	Lgals6	2.46588	2.50487	2.91941	2.51312	2.10785	3.54063	2.46654	2.92675	3.10662	2.64468	2.53603	3.0561	2.00684	2.56927	2.06626	1.83571	2.04642	2.61381	3.06547	1.87959	3.13323	1.92835	3.06348	1.88321	2.75102	2.72915	2.32934	2.54406
chr7:49685474-49685739	Vmn2r-ps60	2.64951	3.04094	2.69014	2.10179	2.29137	2.03923	2.14627	3.18893	2.01903	2.92286	2.67859	2.6467	2.33679	3.03281	3.43154	2.69967	2.57393	1.93729	2.54984	2.85216	2.28536	2.85633	2.03111	2.55647	2.21169	2.66764	2.20525	2.54234
chr1:175204591-175207887	Gm11062	2.46809	2.68965	2.60985	2.59797	2.66071	2.44842	2.66346	2.66835	2.34949	2.6739	2.60044	2.63511	2.61454	2.11072	2.60229	2.34599	2.77738	2.50625	2.79336	2.55059	2.55327	2.46626	2.37438	2.53985	2.56672	2.40934	2.36606	2.54231
chr7:114271865-114272996	Olfr715	2.68188	2.3021	1.4332	2.68837	2.05242	2.37425	2.8409	2.68283	2.25763	2.54767	2.5705	4.53083	2.01527	2.45071	2.37549	2.51858	2.57595	2.92474	2.13422	2.31268	2.37986	2.22347	2.97705	3.09074	2.54909	2.43038	2.69904	2.54148
chr17:30759385-30763850	1700097N02Rik	1.62459	2.36467	2.66135	1.63436	1.1792	1.23573	1.72009	1.22028	1.37572	2.53874	1.98215	1.25224	2.78265	1.53269	1.50715	3.95046	4.85618	4.5145	4.94471	5.18914	3.17398	2.98746	2.27937	3.12904	2.14226	2.41332	2.41602	2.54104
chr3:92054568-92061226	Sprr2a1	1.1685	6.07083	2.88462	1.1257	7.69359	3.42161	4.00724	1.13474	1.30425	1.3216	1.32348	1.24229	1.33091	1.43167	1.5067	1.26618	1.03286	3.74523	3.76429	6.22666	3.69243	2.73167	1.2501	4.74929	1.06396	1.02036	1.08628	2.54063
chr6:128921177-128934725	Clec2g	2.00211	1.89543	2.03274	1.96249	1.94955	2.05192	4.64215	1.98802	3.18349	4.80557	2.35279	2.23949	2.28507	3.10557	2.67145	2.52898	2.15773	2.08439	2.10812	4.77293	3.30394	2.11001	2.70109	2.66648	1.83969	1.47856	1.55802	2.53621
chr7:110865109-110866060	Olfr243	3.12825	2.65303	2.64668	2.82619	2.80086	2.9463	3.11371	2.9108	2.4405	2.17027	1.9465	2.22049	2.13607	2.54801	1.68289	1.95728	2.87858	3.09262	3.51517	2.94096	3.24594	2.39709	2.95063	2.83377	1.32322	1.77463	1.39722	2.53621
chr7:114179649-114180624	Olfr713	2.00776	2.14334	2.06177	1.9667	2.22919	1.96084	2.08381	2.6046	2.01366	2.21901	2.27446	2.53594	2.14543	2.28192	2.05209	2.36804	2.03912	2.07618	1.99173	2.13459	2.44413	2.31148	2.27233	1.9845	5.86906	5.70632	4.60664	2.53276
chrX:4598165-4600108	Gm3763	2.12535	1.62077	2.2991	1.721	1.87202	2.90103	2.23173	2.1648	2.74535	2.57358	4.57931	2.83767	4.89902	3.01166	5.3537	2.66344	1.81585	0.94614	1.99112	2.11547	1.11625	2.04424	1.82815	1.19763	3.91455	2.14475	3.61545	2.53071
chr4:143780619-143786837	Oog2	2.63081	2.53642	2.4458	2.48666	2.78231	2.36303	2.49716	2.53708	2.55315	2.55782	2.44116	2.62351	2.19834	2.67602	3.71491	2.77519	2.59926	2.46319	2.55088	2.49938	2.48708	2.59454	2.1979	2.44316	2.23455	2.0985	2.22495	2.5264
chr3:93875543-93876566	Gm10697	1.92977	1.84753	2.20538	1.73363	2.16426	2.00047	1.86016	2.09698	3.37467	1.98092	3.04719	3.92234	1.74345	3.08091	3.50034	2.2158	2.60206	2.43585	2.44053	4.18819	1.73951	4.21964	2.78916	2.04345	2.02562	2.9927	2.0005	2.52522
chr17:33313360-33314308	Olfr55	1.43049	3.09694	2.12562	2.19974	2.31146	1.95021	3.22601	3.11447	4.63041	2.48223	1.97891	3.27622	2.18634	4.53551	2.09888	2.83521	1.99345	1.81334	4.99264	2.37858	1.93734	1.97505	1.45417	2.25226	1.97121	2.20581	1.69461	2.52397
chr7:24538929-24539871	Vmn1r174	2.48971	1.35683	1.74459	2.29192	2.30514	1.24483	2.31199	2.01779	3.58566	2.22497	1.17833	2.95608	2.11167	5.77814	5.63735	5.0716	2.08642	3.07589	2.53205	0.707274	2.29947	2.74444	2.85542	0.0866788	2.77956	2.10815	2.55163	2.52347
chr17:36217133-36221194	H2-Bl	3.56364	1.48984	2.22955	1.15504	4.60668	3.51879	5.35878	2.60744	1.69125	3.63535	2.77617	1.8781	0.520131	2.9387	2.46241	3.56832	4.17873	3.55029	3.6757	1.22285	2.28094	1.08339	3.26257	3.88979	0.309233	0.142877	0.445051	2.52006
chr9:89094110-89102676	Bcl2a1b	3.48811	2.15275	2.96062	3.07831	2.40296	3.7781	2.85334	2.74642	2.80534	2.1263	2.71425	2.32997	1.9825	3.299	2.24047	2.81776	2.27544	2.22253	1.91496	2.15815	2.91399	2.32846	2.12912	2.20956	2.02144	1.9607	2.08206	2.51824
chr17:39777901-39782612	Gm9041	2.06366	2.13483	2.34546	3.05331	3.26924	4.12364	3.02825	3.22494	2.52807	5.28847	6.31138	2.07307	3.75147	2.54528	2.01828	3.20904	3.94945	1.04659	2.0697	0	2.09535	0	0.993007	0.939009	1.86218	2.14755	1.9176	2.5181
chr19:39303743-39349227	Cyp2c53-ps	2.64282	2.00029	2.5566	2.6175	2.3913	2.90046	2.4194	2.34707	2.01343	2.20377	1.89769	2.09959	3.2942	2.55917	1.94287	2.97155	2.54883	2.01833	3.28877	3.46394	2.93281	2.9221	2.6386	2.97011	2.12564	1.92385	2.2767	2.51731
chr12:89192923-89199126	Gm2042	2.94316	2.51634	2.52702	2.71566	0.778632	3.33195	1.91887	2.32902	2.75113	3.831	2.09736	3.5833	2.35992	3.02614	3.10152	2.2656	2.38213	2.48862	2.66552	2.35652	2.48143	2.11554	2.35383	2.14442	2.26446	2.23797	2.29128	2.51327
chr17:36179905-36195590	Gm6034	2.69068	2.50428	1.72634	1.9714	2.87397	2.93478	2.94772	2.57951	2.21984	2.62506	2.26155	2.23435	2.25058	2.88012	2.72182	2.32836	2.4693	2.43175	2.93153	2.17057	1.97887	2.37049	2.00888	2.56766	2.95937	2.95352	3.26212	2.51313
chr12:89192923-89199120	Oog1	2.94257	2.51619	2.52568	2.71534	0.779134	3.33072	1.91792	2.32853	2.75037	3.82819	2.09731	3.58067	2.35816	3.02483	3.10127	2.26618	2.38125	2.48794	2.66533	2.3562	2.48045	2.11572	2.35268	2.14384	2.26348	2.2369	2.29003	2.51248
chr17:31038811-31073455	Glp1r	1.96887	2.58605	2.4759	1.9287	1.98643	1.78698	1.98247	1.97125	1.92071	1.98906	1.91029	1.8684	2.93771	2.15103	1.98246	3.03024	4.4531	3.90098	2.57306	4.48618	3.2377	3.21374	2.56559	2.61619	2.03126	2.03281	2.05566	2.50529
chr9:123891781-123893241	Ccr1l1	2.08569	2.10739	2.15964	2.16742	2.02877	1.97851	2.34828	1.04963	2.12133	2.05945	2.28151	2.1552	2.35926	2.40104	3.05933	3.58603	1.24813	1.99233	2.18536	3.08228	3.05226	2.01642	4.3741	2.33424	4.77542	3.39101	3.2416	2.50525
chr7:7336695-7352338	Vmn2r31	1.75065	3.86641	2.13232	3.22519	3.71113	3.09277	1.84736	3.0787	3.26326	3.42821	1.53918	2.41981	4.4948	3.95054	2.43385	3.43873	0.875509	1.76623	2.61783	0.836684	1.00375	1.11346	0.881738	0.825487	3.34448	3.35463	3.29197	2.50314
chr11:58644657-58645584	Olfr312	2.57639	2.64572	2.8366	2.27774	2.17673	2.35908	2.16807	2.19549	2.90961	2.75405	2.74764	2.44546	2.51478	2.98471	2.20259	2.91308	2.54007	2.70438	2.94612	2.02982	2.65022	2.78538	2.40677	2.69317	2.34936	1.83121	1.83038	2.49906
chr11:100107405-100110216	Krt16	2.19802	2.15941	2.18572	2.79595	1.87675	2.81915	2.62205	2.76907	3.43957	2.7675	2.45919	2.63744	2.39716	3.8891	2.43232	2.39655	2.13567	2.75406	1.92296	1.97143	2.37624	2.87675	2.18299	1.8823	2.3817	2.46895	2.6407	2.49773
chr7:19007884-19017404	Psg28	3.32076	2.1363	2.02943	2.27207	3.11913	2.05876	4.2557	2.39918	2.19078	2.34601	2.29202	2.40003	2.21308	2.3178	2.00607	4.36887	2.33862	2.3347	2.21569	2.41841	2.65516	2.23355	2.31638	2.31533	2.16285	2.3541	2.24604	2.49322
chr14:44396430-44397304	Ear1	2.96554	3.88954	3.36783	2.86032	2.01926	3.22904	3.51499	4.59903	1.23506	2.03452	1.91205	2.12281	1.24872	1.48387	1.73737	2.06703	1.89022	2.10152	2.78698	4.4755	3.11367	2.82401	1.8382	2.16238	1.69099	2.26388	1.87875	2.49308
chr17:7183208-7202542	Rnaset2b	2.77633	2.96587	2.79641	2.29893	2.13477	1.4783	2.72515	1.42253	2.94244	2.4292	3.02122	2.63581	2.14302	2.89223	2.13349	3.53092	3.45983	2.38087	1.512	3.68186	2.058	1.87822	3.17525	2.8125	2.45049	1.79234	1.77463	2.49269
chr1:173769827-173785228	Cd84	2.06717	2.87058	2.92213	2.96116	2.1547	2.07876	2.09305	2.15367	2.21691	4.02544	4.05458	3.12731	2.13238	2.12996	3.84296	3.01577	2.06081	2.09999	2.11923	2.20374	2.10664	2.13082	2.20918	2.066	2.10993	2.16099	2.14924	2.49123
chr14:3224445-3234357	D830030K20Rik	1.79717	3.42819	4.38771	1.64814	2.34625	3.02552	2.27825	2.08979	0.653287	2.41907	1.96594	1.26171	1.58025	1.4483	1.94691	2.39011	2.05819	2.69366	3.0945	1.93377	2.62366	3.04593	3.2134	2.97488	3.56228	3.72072	3.65968	2.49064
chr7:24443334-24445682	Vmn1r172	1.9904	3.21751	4.03963	2.01373	2.10205	3.12317	1.92114	2.08845	2.31873	1.97621	2.10148	3.49947	1.78953	3.49108	1.22336	2.16032	2.05324	3.98398	1.90974	3.66853	2.12198	2.78795	3.82809	1.87257	1.96193	2.09354	1.90308	2.4904
chr14:56568645-56571208	Mcpt-ps1	4.04654	4.03432	2.90133	4.08363	3.98701	2.80628	4.14815	4.26592	2.02743	2.1092	1.87107	1.85238	1.85231	1.84249	2.14576	1.96574	1.98185	1.80657	2.23662	2.18915	1.97195	2.04177	1.89373	1.97892	1.59854	1.73465	1.81083	2.4883
chrX:3748108-3750057	Gm3706	2.24568	1.59792	2.27944	1.31256	2.18327	3.45209	2.30699	2.25221	2.91564	3.47406	4.61733	3.04051	4.60938	3.10673	5.19113	3.15947	1.50008	0.779033	1.67532	1.86525	1.18326	1.6757	1.80376	1.28072	3.1207	1.60327	2.93064	2.48749
chr17:34132956-34137278	H2-K1	2.94672	3.01889	2.55619	1.93659	2.35623	2.11353	2.77042	1.87668	2.93508	2.82596	2.53448	2.36311	2.62034	2.5375	3.13666	2.74632	2.59291	4.07471	2.92522	2.80546	2.79658	2.43824	2.68564	2.98448	0.802123	0.887832	0.872136	2.48667
chrX:5246184-5248144	Gm14374	2.80842	1.67167	2.87586	1.95693	2.93672	4.18063	2.88687	2.92212	2.28626	3.52435	3.98675	2.57533	4.22244	2.41653	4.89133	3.22424	1.35309	0.78063	1.62431	1.41128	0.965815	1.42317	1.43205	1.04216	3.07941	1.64841	2.87789	2.48165
chr4:61331211-61335128	LOC100048884	2.84744	2.25867	1.90663	2.37712	2.9843	2.8943	1.73665	2.63596	2.45376	2.1951	2.99172	2.82796	1.89394	2.07	2.88083	2.65057	2.39442	3.03691	3.23738	1.97389	2.8645	2.23986	3.49486	1.90924	1.9326	2.0233	2.2017	2.47828
chr3:88172538-88173642	Bglap-rs1	4.21064	7.62056	3.8632	1.80335	4.30661	4.09457	2.22685	2.12509	1.97185	2.165	1.8758	2.35888	2.0575	3.09236	3.19244	2.40237	1.7159	1.98534	1.8051	1.94108	2.19245	2.09493	1.69294	1.99487	0.686871	0.624338	0.683099	2.47348
chr11:73266776-73267712	Olfr380	2.81299	2.48548	2.81204	2.66633	2.33178	1.79006	2.43742	2.56323	3.12431	1.26881	2.89534	2.71232	2.68899	3.10702	2.35514	1.77178	2.67059	2.95739	2.27215	2.79349	2.10681	2.31374	2.55183	2.34963	2.77634	2.04147	2.08332	2.47184
chrX:4446441-4448390	Gm3706	2.04949	1.75598	2.20621	1.40542	1.93671	3.26808	2.10555	2.19438	3.29041	3.00407	4.68982	2.95479	4.74386	3.14348	5.52972	3.00583	1.58053	0.907351	1.66492	1.55321	1.11758	1.6131	1.51531	1.29593	3.56438	1.60165	3.0094	2.47064
chr4:88437453-88438002	Gm13285	3.43441	1.16659	3.03116	0.861882	1.92442	3.8667	2.73535	1.00811	2.41546	2.47328	1.67966	2.38166	1.48279	1.01299	1.47013	4.7374	3.03173	2.70611	2.68718	3.31897	3.73406	1.84733	2.81458	3.30111	2.592	2.45634	2.52518	2.47024
chr7:11983263-11987667	Zscan4f	1.44157	2.76063	1.9939	1.74134	2.7817	1.76722	2.19092	2.82291	3.19361	1.74906	3.18783	3.71335	3.99452	4.98348	4.04558	2.08793	1.13656	1.86625	0.98602	1.28154	1.77735	2.45013	1.51187	3.6314	2.43163	2.53091	2.50002	2.46516
chrX:3665477-3667437	Gm14346	2.14284	1.90256	2.00759	1.45537	2.28934	2.92056	2.08176	1.99302	2.88925	2.82185	5.18081	2.8657	5.02021	3.48784	6.30349	2.78998	1.41268	0.958194	1.81561	1.62219	0.994126	1.6919	1.6521	1.01697	2.86164	1.46991	2.89096	2.46439
chr19:13936284-13937235	Olfr1502	2.26198	2.3591	2.13042	2.10211	1.98503	2.00495	2.19	2.05311	2.19781	2.37094	2.58892	3.2122	3.42245	3.53784	2.25841	3.04235	2.15811	2.63631	2.39305	2.29069	2.62366	2.18355	2.13053	2.23062	2.73804	2.37921	2.95835	2.46073
chr4:63023482-63026911	Orm2	2.28465	2.03133	2.25221	2.15382	2.09612	2.1344	2.49831	2.03122	3.50289	2.54924	2.46191	2.61307	2.27184	3.25746	2.50502	4.48916	2.18673	2.56335	2.51847	2.78871	2.02823	2.00474	2.68147	2.8217	1.85318	2.0649	1.78443	2.46032
chr6:42421233-42422175	Olfr457	2.38973	2.74553	2.54351	3.06722	2.80454	2.34673	2.57405	2.60067	2.68886	3.91616	2.25506	1.77012	3.16745	1.50434	1.53609	2.89904	2.42814	2.75364	2.6183	1.98312	2.42054	2.07704	2.23309	2.37615	2.40706	2.2108	2.09164	2.45958
chr16:58823606-58826587	Olfr175-ps1	2.1561	2.11526	2.20662	1.98443	2.04569	3.70117	2.0797	3.25666	3.12323	2.14917	2.12341	2.32126	2.21017	2.89508	2.0914	2.24838	2.881	2.94743	2.14407	2.03347	2.32274	2.8757	3.21564	2.92512	2.07487	2.0689	2.17725	2.45829
chrX:3665486-3667437	Gm14351	2.14163	1.90432	2.00262	1.4478	2.28505	2.90568	2.07775	1.99148	2.88732	2.81549	5.17508	2.86039	5.01448	3.47318	6.2866	2.77607	1.40666	0.954715	1.80734	1.6215	0.990706	1.68966	1.6513	1.01364	2.84415	1.46404	2.88407	2.45825
chr17:34624350-34634374	Btnl5	1.71537	2.31691	1.21232	2.4236	2.71195	2.37591	2.72513	2.51836	4.00028	2.4635	2.30916	3.81483	2.52471	3.02368	2.80289	3.47036	2.21671	2.2155	1.26373	2.21969	2.1008	2.1884	2.68956	2.281	2.12291	2.39428	2.21392	2.45613
chr16:98283676-98303604	A630089N07Rik	2.31516	2.33243	2.32974	2.36921	2.49865	2.369	2.33852	2.4123	2.42806	2.51401	2.71543	3.1152	2.44877	2.77848	2.68352	2.59189	2.37873	2.27073	2.34718	2.42199	2.3902	2.30025	2.45109	2.24559	2.40634	2.34401	2.44009	2.45321
chr8:22845008-22845849	Defa6	2.38062	2.43829	2.71203	2.81729	2.33071	2.74405	3.27944	2.69953	2.30171	1.97189	2.70004	2.57877	2.36398	3.04449	2.52951	2.92736	2.54686	2.16238	2.15035	2.10972	1.76166	2.13994	2.47991	2.15859	2.51872	2.13028	2.05534	2.44568
chr17:38553418-38557130	Gm20408	2.24573	2.18203	2.33173	2.405	3.55506	2.05416	2.33247	3.44834	2.5493	2.45153	2.26627	2.56946	2.23196	2.63263	2.38707	2.14313	2.31254	2.1592	3.31047	2.50962	2.38038	2.19199	2.22952	2.47141	2.24187	2.19521	2.2346	2.44528
chr15:63648742-63651095	1700065I16Rik	1.96709	1.98055	4.70046	1.9664	2.22664	2.11599	2.15868	1.88279	2.04984	3.61777	1.99533	2.02276	1.90061	2.16663	1.96051	1.95944	2.07283	4.4748	1.31253	1.96062	1.93787	1.57191	1.95919	1.98236	4.1756	4.00921	3.81591	2.44238
chr4:88203576-88204149	Gm12597	2.67441	2.5953	1.77462	2.28301	2.70541	2.0993	2.56143	2.38836	2.09187	2.51077	2.56536	2.13788	2.90273	2.50593	2.65732	2.80217	2.41246	2.67345	2.5839	2.46065	2.19195	3.04271	2.51274	2.30292	1.93942	2.56676	1.97397	2.44136
chr8:22844965-22845943	Defa24	2.36069	2.44162	2.66107	2.78282	2.3554	2.76763	3.12555	2.65646	2.34956	2.01359	2.68187	2.61828	2.39117	2.95498	2.49032	2.99621	2.62329	2.19017	2.13089	2.1329	1.78294	2.09073	2.42123	2.10284	2.49886	2.1887	2.02788	2.43843
chr19:12975338-12976268	Olfr1447	2.27333	2.2201	1.99269	1.89868	1.75226	1.89283	1.86262	2.32805	2.67655	2.6661	3.26897	3.85481	2.70108	3.74621	3.76385	3.38985	2.2331	2.37169	2.32551	2.00758	2.12494	2.0952	2.13117	2.01764	1.93129	1.94809	2.29393	2.43586
chr3:94497494-94508328	Selenbp2	2.15408	2.1005	2.18091	1.97851	2.01799	2.22751	2.10332	2.13981	3.15388	2.18109	2.90472	3.90456	4.21073	3.24493	2.15476	2.1386	1.90162	1.99356	2.05397	2.08581	2.05466	3.0816	3.29765	1.98677	2.11562	2.19247	2.19884	2.4355
chr5:16981939-16986754	Speer4f	2.08041	2.24013	2.39859	2.21549	2.21286	2.0794	2.22591	2.2233	2.98141	2.66882	2.57411	2.74776	2.68107	3.20373	3.30941	3.09491	2.37856	2.10116	2.21832	2.33868	2.33229	2.15633	2.25489	2.18118	2.10365	2.44118	2.25535	2.43329
chr4:143796664-143802920	C87977	2.41741	2.35141	2.39216	2.44104	2.52377	2.2365	2.46324	2.38632	2.43817	2.61366	2.47987	2.49455	2.36416	2.90297	3.5489	2.45501	2.50637	2.10133	2.29917	2.41113	2.44712	2.44734	2.12862	2.25546	2.08559	2.25309	2.12579	2.42852
chr10:77233377-77234070	Gm3238	3.25289	2.37375	2.59168	2.29901	2.5574	2.26184	2.16441	2.85037	1.87517	1.92931	2.36364	5.10503	1.58601	1.62219	3.07342	1.87939	2.43461	1.71853	1.89083	1.89974	2.65856	2.73616	2.3419	2.64425	2.36205	2.71376	2.38137	2.42842
chr4:61439361-61443258	Mup19	2.50215	2.12898	1.73005	2.27074	2.60136	2.65204	1.75737	4.37694	1.90223	1.49932	1.66504	2.19726	1.07724	1.18205	1.44366	1.7711	2.71504	4.23045	4.19008	1.54132	2.90936	2.15427	4.69903	2.1645	2.65224	2.70295	2.76976	2.42543
chr3:92019756-92026413	Sprr2a1	1.1365	5.87489	2.96521	1.17208	7.40721	3.51857	4.02082	1.13327	1.24334	1.33948	1.29304	1.2312	1.2711	1.18975	1.26943	1.17779	1.20388	3.31942	3.85391	5.27261	3.33807	2.51925	1.20573	4.01558	1.14091	1.14849	1.14262	2.42238
chr17:36192760-36195316	Gm11127	3.41345	2.58155	1.76548	1.69459	3.29827	3.00539	3.46468	2.40154	1.69787	2.49159	2.13442	1.79171	1.66766	2.2039	2.27023	2.14972	2.00908	3.00379	2.87279	2.17269	1.66066	2.12472	1.96246	2.10141	2.91156	2.81683	3.67187	2.42
chr7:53995868-53998350	Saa1	2.3863	2.08382	2.18748	2.17904	2.44334	2.23561	2.55406	2.16027	2.31968	2.28861	2.88649	2.26407	2.21736	2.32636	2.7019	2.31168	2.55981	2.59319	3.11844	2.39895	2.87202	3.39359	2.37567	1.89776	2.19552	2.43029	1.93719	2.4192
chr7:147760053-147760986	Olfr538	2.37998	2.54223	2.0878	2.20788	2.51273	2.23088	2.47017	2.3137	2.37795	2.7363	2.12606	2.34171	2.71809	2.84021	1.27574	2.48314	2.2205	2.22357	2.35555	2.55407	2.53055	2.60647	2.53994	2.25282	3.25781	2.47539	2.6269	2.41808
chr17:13427736-13429320	Smok2b	0	0	0.00475951	0.674765	1.52932	1.02643	0	1.27008	2.98464	3.0228	4.87264	3.86058	4.61827	5.87435	3.53883	1.91524	2.00657	1.76487	1.9759	2.10444	1.84289	2.08039	1.01778	3.70549	3.813	4.602	5.17031	2.41764
chr7:110925909-110926857	Olfr68	3.20444	2.53717	2.35713	2.89705	2.37559	2.38006	2.90737	3.11614	2.12519	2.08012	2.3506	2.3626	2.42921	2.40538	2.27902	2.35906	2.07283	2.3951	2.20238	2.2384	2.44039	2.28461	2.07477	2.52407	2.61432	1.9892	2.18741	2.41443
chr11:83517557-83519771	Wfdc17	2.8652	1.82996	2.10474	2.87361	3.45273	2.39334	3.05195	3.04533	2.20566	2.275	2.19895	2.18674	2.16027	2.22947	2.41273	2.16497	2.82313	2.34832	2.11719	2.1378	2.19311	2.03784	2.21772	2.82414	2.33965	2.41476	2.26292	2.4136
chr17:37222135-37223181	Olfr90	2.02577	2.30476	2.40369	2.305	3.39955	4.23192	2.22429	3.69618	2.52903	1.88606	2.34891	2.33787	2.16673	2.06124	1.86795	1.98119	2.19384	1.84853	3.51789	2.18543	2.25715	2.25325	2.17458	2.2167	2.01864	2.70266	1.80364	2.40528
chr3:92770982-92772203	2310001H18Rik	2.42205	2.56625	2.38333	1.97039	2.15741	2.3185	2.58904	2.48139	2.19737	2.56915	2.71791	2.31007	2.23329	2.48056	2.53111	2.07238	2.5231	2.19235	2.78242	2.73584	2.13685	2.4861	2.82643	2.75112	1.89354	2.23308	2.37378	2.40499
chr13:33753273-33763454	Serpinb6d	1.98869	2.10252	2.08011	2.01064	2.08326	2.00449	2.04933	2.14154	3.02706	3.11755	3.24788	2.86801	3.14273	3.2062	3.14941	3.29546	2.14177	2.07409	2.20088	2.20167	2.15463	2.01013	2.09616	2.10871	2.20622	2.04317	2.1185	2.40262
chr3:64341482-64363740	Vmn2r6	2.18532	2.17374	2.19657	2.15272	2.19716	2.04233	3.23371	2.16112	2.11022	2.2094	1.18541	2.35756	3.26833	2.46873	2.24193	2.20475	4.31311	3.09433	2.50751	3.19955	3.22027	2.14856	2.19935	1.11689	2.25172	2.26311	2.16319	2.40247
chr9:3038668-3038743	Mir101c	3.13579	3.41105	3.02652	3.55579	2.62677	2.40756	2.16362	2.74155	3.65514	2.07226	3.4501	2.9905	2.68812	3.74397	2.70268	2.62572	1.42307	1.05465	0	2.10544	2.05594	1.56052	3.13563	0.580332	2.33037	2.09075	1.53019	2.40237
chr17:36806952-36809142	H2-M1	2.25382	2.25861	2.16583	3.16276	2.53546	3.08515	2.25617	1.96662	2.14383	3.07305	2.19953	2.09367	3.40536	2.18112	1.89188	2.12389	2.21581	4.3114	2.28643	2.21125	1.11222	2.21406	2.33658	2.26882	2.40157	2.29282	2.38206	2.4011
chr10:78710521-78757280	Vmn2r81	2.18593	2.17511	2.22287	2.15952	2.1889	2.1067	2.19571	2.13383	2.06363	2.1159	3.38138	3.36799	3.34319	2.49013	3.36003	3.39301	2.19421	2.15544	2.21631	2.16157	2.12876	2.13879	2.19359	2.2134	2.18728	2.18834	2.14386	2.4002
chr19:34682446-34687891	I830012O16Rik	1.93427	3.4253	2.67311	2.65545	2.01595	2.99203	2.5618	2.20654	2.82447	1.87508	1.77507	2.16158	2.0588	2.04622	1.83803	1.34276	2.52334	2.29488	2.92524	2.08904	3.3545	2.6159	2.4766	2.10693	2.52061	2.85998	2.58229	2.39762
chr6:129849008-129863242	Klra5	2.09512	2.09429	2.0097	2.27732	2.24015	2.10242	2.46701	2.12647	2.46613	2.33567	2.14879	2.59622	2.57324	2.48192	2.08971	2.22526	2.41875	2.23828	2.36906	2.15776	2.8446	2.11283	3.30413	4.56775	2.1723	2.11089	2.0539	2.39554
chr13:13449887-13485891	Gpr137b	2.70367	1.30253	2.69635	3.45839	1.31123	4.2646	1.3204	1.31115	2.92045	1.73048	2.61749	2.36929	2.71219	2.68952	1.87015	2.169	2.07996	2.86167	2.91045	2.87691	2.10551	2.08839	3.05502	1.24705	2.89384	2.41761	2.58681	2.39149
chr13:50696340-50696449	Mir683-1	2.37871	1.51243	2.43823	2.46337	1.90347	1.99816	1.8453	3.56712	2.22825	4.18674	2.38947	3.47999	1.81254	3.74852	2.57292	2.84752	2.38176	2.57396	2.19287	2.7765	2.85066	0.0481172	1.28457	2.27253	2.26961	2.45567	2.07862	2.39102
chr12:89055024-89059124	BB287469	2.65878	1.90969	2.69606	3.25522	0.928422	3.31054	2.09916	2.52024	2.37426	3.48555	2.13068	2.56387	2.44287	2.65009	2.8641	2.96513	2.1431	2.23955	2.47249	2.23617	2.05101	2.0202	2.16701	2.33936	1.93407	2.02213	2.01032	2.38852
chr15:77355296-77363745	Apol7c	3.04053	2.09937	3.19866	2.17143	1.18821	2.04443	2.22401	1.28553	3.66916	3.4992	3.72756	3.93209	2.96724	3.11833	2.71842	2.37926	2.5697	1.68855	1.23142	3.29033	2.37763	2.31479	2.40396	1.22354	1.29579	1.34175	1.41341	2.38571
chr19:13993511-13994462	Olfr1505	2.33599	1.99474	2.34341	2.44003	2.13773	1.97051	2.26185	1.91527	2.25658	2.30057	2.8644	3.00136	3.12006	2.85499	2.28362	2.36812	2.42704	2.29401	2.93342	2.52161	2.46365	2.86806	2.2659	2.17646	1.99818	2.20477	1.79838	2.38521
chr7:19232002-19242074	Psg21	2.27018	2.57327	2.39028	2.49611	2.44561	2.29193	2.17894	2.5953	2.40847	2.97678	2.36267	2.53799	2.15535	2.38001	2.24893	2.08531	2.48839	2.5443	2.17473	2.50686	2.54254	2.16429	2.48129	2.32306	2.11036	2.22571	2.29276	2.37968
chr9:3190268-3199813	4930433N12Rik	2.41719	2.46795	2.37956	2.20118	2.2736	2.25119	2.29918	2.52391	2.30185	2.65666	2.3614	2.51531	2.23606	2.7701	2.45534	2.55922	2.31946	2.33241	2.367	2.39182	2.54201	2.54731	2.24538	2.28307	2.10628	2.13567	2.28015	2.37853
chrX:31875768-31877469	Gm2933	1.87149	1.58365	1.89443	1.30822	1.93646	3.82546	2.1	2.03221	3.2004	2.55358	5.04074	3.34568	4.34542	2.43799	5.52592	2.60276	1.34557	1.07182	2.25378	1.21918	1.07281	1.54	1.08225	1.18555	2.80908	1.69493	3.16229	2.37191
chr9:109173638-109190190	Fbxw14	2.2806	3.37879	2.86892	2.89745	3.08959	2.24313	2.92414	2.78112	2.76387	2.4567	1.15796	2.14443	1.4596	2.73446	2.66043	2.19095	2.035	1.68524	2.48042	1.79605	2.43425	2.35063	2.53608	2.43481	2.0712	2.12264	2.0605	2.37181
chr9:37580221-37581225	Olfr875	2.29075	2.29694	2.36549	2.29118	1.86614	2.22911	2.3017	2.29697	2.18024	1.73058	2.04146	2.17086	2.61487	1.87925	2.1804	2.38836	1.91115	2.29048	2.60264	2.14108	2.18014	2.3732	2.19487	1.99432	3.49054	5.13363	2.47628	2.36713
chr2:89958823-89959753	Olfr1269	2.02301	2.39304	2.24645	2.23902	2.12597	2.08911	2.32361	2.31239	2.21702	1.9705	2.30581	2.5723	2.3288	2.43436	4.73266	2.26762	2.13505	2.60886	2.58555	2.2866	2.14412	2.32688	2.29222	2.0408	2.33954	2.32368	2.14734	2.36342
chr1:175892699-175912975	Ifi202b	3.86943	1.69147	2.20862	2.2322	1.69466	2.34156	2.21944	1.04332	3.72386	2.21465	3.11271	3.82168	3.55197	1.47135	3.72969	0.828051	4.11702	2.01281	1.05875	2.12974	2.60476	3.3319	3.13006	2.71288	1.01945	0.958143	0.970763	2.363
chr1:21339757-21342280	Khdc1a	1.56028	1.67447	1.91791	2.41981	2.75998	2.5559	1.87504	3.02801	1.67646	2.24529	2.74416	2.59168	1.88186	2.49227	1.82497	1.98763	2.36766	2.67742	3.11598	1.8113	3.06352	3.15689	2.33693	2.56408	2.54343	2.54227	2.35681	2.36193
chr2:103911166-103925114	Cd59b	2.19432	2.20889	2.03733	2.22063	2.28186	2.19739	2.25822	1.9212	4.21446	2.37317	2.26759	2.99898	2.19289	3.74052	2.4723	2.32367	2.12784	2.22481	2.28005	2.23704	2.20117	2.13654	2.12611	2.14487	2.10191	2.15739	2.11515	2.36134
chr13:61665989-61671487	Cts3	2.23295	2.00974	2.17693	2.06466	2.20455	2.13215	2.26959	2.1929	2.21122	2.32087	2.32789	2.50021	2.38106	2.42474	2.11581	2.15706	2.37361	2.44382	2.35272	2.273	2.38185	4.25972	2.3643	2.18247	2.41575	2.53203	2.41058	2.35971
chr10:43935230-43939391	Speer5-ps1	2.06356	2.13108	2.02969	2.08366	2.18409	2.03306	2.08189	2.20981	2.07602	2.41631	4.366	4.27041	2.04143	2.75434	2.59853	2.14485	2.25842	2.04601	2.14598	2.17742	2.25574	2.34669	2.05006	2.32356	2.08979	2.26581	2.2277	2.35822
chr17:12571474-12612250	Plg	1.9849	2.05487	1.98542	2.02834	4.72767	4.61676	1.94383	4.73325	2.01108	1.96946	1.97719	1.91978	1.98608	2.02365	2.00458	2.01911	1.94652	1.95552	3.81914	1.9898	1.95498	1.9744	1.98125	1.98564	1.9583	1.99985	2.0705	2.35637
chr6:128902370-128925047	Gm15987	2.06704	2.38843	2.09366	2.53895	1.60445	1.37292	4.56793	2.21732	3.2113	3.96629	1.08471	2.3272	1.87335	2.83598	1.45003	2.11321	2.41708	2.66045	2.50472	4.65288	3.49744	1.19047	2.12507	2.26711	0.982522	2.09157	1.50751	2.35591
chr6:128656525-128673064	Klrb1	3.24511	3.11056	3.12544	3.20359	2.70211	3.05377	3.16158	2.50929	1.83395	1.94471	2.76047	1.76875	1.80291	2.03151	2.69225	1.7544	1.89087	1.76704	1.87167	3.30518	2.46125	1.73811	2.54927	2.55196	1.38728	1.71296	1.53732	2.35086
chr7:5098091-5099024	Vmn1r55	1.99078	2.2818	2.03682	2.28325	2.13613	1.8971	2.4888	2.1855	2.41009	2.05746	1.25648	2.31987	3.55573	2.72421	2.15091	4.40627	1.85525	2.15801	2.64389	2.40194	2.10748	2.25895	2.3763	2.07345	2.37488	2.0357	2.87544	2.34602
chr4:88217132-88217702	Ifna14	2.7529	2.08418	2.53961	2.47952	2.03682	2.05764	2.16922	2.65255	2.15986	2.30536	2.32253	2.22974	1.8826	2.79742	2.39172	2.44313	2.07713	2.3453	2.27319	2.00698	2.62632	2.78511	2.54624	2.03473	2.96363	2.26241	2.05066	2.34357
chr7:108727373-108729675	Art2b	2.25883	0.974759	1.69496	1.04133	1.72164	2.06477	3.0542	0.0476288	2.24143	2.57786	2.03659	1.9656	2.19242	2.32239	2.20345	2.18775	2.17563	3.98058	4.25272	2.08079	2.94597	2.33861	3.05431	4.19284	2.47665	2.51388	2.57149	2.3396
chr14:3188283-3196683	Gm5795	1.61959	2.17869	2.23822	1.48196	1.78019	1.96888	2.02715	1.19066	1.34874	1.88589	2.37721	2.43475	2.81602	1.51435	2.36898	3.0999	1.5393	2.74316	1.9214	1.86182	2.95635	3.05179	2.69094	2.72478	3.64909	3.86285	3.81491	2.3388
chrX:3748193-3749684	Gm3750	2.15718	1.50474	2.18105	1.28008	2.08598	3.05854	2.1207	2.05	2.65865	3.217	4.24743	2.92936	4.22885	2.9649	4.67194	2.77366	1.44582	0.642663	1.50879	1.95184	1.1618	1.62694	1.76376	1.29708	3.06833	1.57591	2.81909	2.33304
chr11:101107647-101109564	Ramp2	2.24129	2.51915	2.2165	2.4675	2.09353	3.48686	2.21396	1.94754	2.45011	2.11771	2.14737	2.11249	2.3599	2.29477	2.2935	2.71238	2.35342	2.30008	2.26067	2.35402	2.19653	2.30695	2.22078	2.39757	2.02742	2.31098	2.56714	2.33223
chr6:124520447-124531062	C1rb	2.20549	3.13979	2.22905	3.04878	2.01523	1.94233	2.50476	3.01353	1.79315	1.911	1.42014	0.989032	1.68548	2.27602	1.86666	2.08056	2.28807	2.39062	2.07274	1.95575	1.93367	2.59362	2.26701	3.46903	3.31196	3.20802	3.35128	2.33195
chr19:13604164-13605112	Olfr1480	1.96585	2.4485	1.91463	2.10084	2.22955	1.89697	2.32255	2.23723	2.80405	2.84161	3.08934	3.82291	2.24096	2.81387	2.73916	2.42312	2.01203	2.20629	1.85499	2.30252	1.85279	2.10665	2.22643	2.1256	1.93595	2.19687	2.19018	2.32968
chr17:37229878-37230817	Olfr91	2.19061	2.12123	2.39823	1.81669	2.81215	3.97429	2.13809	3.02835	2.15731	2.26617	2.274	2.09845	2.07855	2.35179	1.81537	2.31543	2.21765	2.16555	3.66942	2.19973	2.32493	2.22124	2.28798	2.17089	1.74794	2.05147	1.96732	2.32818
chrX:4446526-4448017	Gm3750	2.01851	1.58865	2.0649	1.33428	1.85546	3.04592	1.90877	2.10369	3.13422	2.93997	4.28585	2.81355	4.55936	2.77359	5.02173	2.71834	1.5383	0.911936	1.57606	1.47321	1.02492	1.51294	1.38834	1.16397	3.483	1.52241	3.08718	2.32774
chr15:100165359-100170600	Mettl7a3	3.10026	1.96446	2.89146	3.88057	2.03675	2.22204	2.11777	1.96293	1.84068	3.49072	3.07849	2.5917	2.96299	2.00672	2.2946	2.05425	2.02613	3.15853	2.12571	1.91614	2.94126	0.097507	2.19859	1.98478	1.97305	1.93293	1.9852	2.32727
chr17:39543303-39547937	Gm20579	2.06792	2.14626	2.08945	1.9107	2.64641	2.70153	2.07449	2.49726	1.99626	4.38207	4.03569	1.92568	3.30486	2.46448	2.02891	3.2501	2.02883	2.09206	2.52352	2.04208	1.98718	2.19232	1.16872	0.87093	2.20165	2.0869	2.07707	2.32568
chr13:23323983-23324910	Vmn1r222	2.18365	2.29187	2.07822	2.16694	2.69006	2.24549	2.16696	2.53438	2.1276	2.78737	2.70943	2.4393	2.63168	2.6334	2.41389	2.74705	2.09933	2.66845	2.16991	1.88537	2.13443	1.82886	2.18655	2.17698	2.06273	2.29061	2.39725	2.32399
chr5:10865028-10870808	Gm6455	2.33229	1.88037	1.93033	2.06256	1.87577	1.95503	2.13243	2.42958	2.3633	2.91507	2.14406	2.89669	2.63368	2.40607	2.26677	2.20045	1.98007	1.84449	2.29918	1.98156	2.27405	1.61912	3.13322	3.00591	2.74653	3.00716	2.39297	2.32254
chr10:77261131-77261878	Gm19668	1.83746	2.43732	2.35013	2.06852	2.65962	1.86268	2.90448	2.121	2.4017	2.3017	2.26397	2.51675	2.51218	2.37188	2.42693	4.20292	2.24637	1.90529	2.3362	2.00293	2.1297	2.15643	2.15278	2.15572	2.18403	1.97679	2.22228	2.32251
chr17:35516561-35521619	H2-Q4	1.57501	2.42617	2.23214	2.22722	2.36749	2.31752	2.36842	2.01049	2.94288	3.04013	2.69862	2.7681	1.57966	2.88777	1.87792	2.23055	2.23166	2.83481	2.94065	1.44025	2.46752	2.85834	2.14619	1.45335	2.26215	2.19745	2.31295	2.32205
chr13:22446214-22447117	Vmn1r198	2.26492	2.06956	2.15292	2.18737	2.04662	1.75029	2.06383	2.20265	2.35714	3.33938	2.21806	3.13942	2.16981	2.21751	3.29897	2.5772	2.22796	2.10052	2.06759	2.32008	2.58515	2.44785	2.20278	2.00456	1.85231	2.10558	2.65135	2.31931
chr12:105091504-105101829	Serpina1a	2.28127	2.24464	2.70166	2.49364	2.97425	2.11596	2.69831	2.33202	1.81184	1.01906	3.52399	0.701827	2.61415	2.19136	2.97819	2.72986	2.27128	2.35468	2.14496	2.40909	2.42068	2.45342	2.31694	2.31548	2.08586	2.24227	2.17661	2.31864
chr9:88475873-88483657	Trim43a	2.84932	1.97028	2.31802	2.22455	1.92422	2.82141	2.37069	2.34715	2.47739	3.07103	2.83971	2.06295	2.31075	3.13931	2.42224	2.72768	1.97636	2.04503	1.8466	2.10022	2.4422	2.08726	2.11685	1.91229	2.06265	1.93536	2.05564	2.31323
chr11:83037077-83040086	AI662270	2.31024	2.8605	2.69318	2.50175	2.94027	2.21221	2.80845	2.68502	3.46462	3.53095	2.7639	1.80327	1.75284	2.3031	2.61758	2.16785	1.97821	1.97685	2.03634	1.80296	1.99754	1.9924	1.83554	1.9036	1.83338	1.85407	1.78824	2.31166
chr6:133479206-133482780	Gm5885	2.26194	2.65694	2.22228	1.79096	2.37199	2.34717	2.214	2.31122	2.48898	3.03209	2.83702	2.73885	2.23497	1.99788	3.01649	2.18201	2.07392	2.3265	2.00121	2.20148	2.24327	2.26126	2.13375	2.37771	2.16051	2.04861	1.82847	2.30968
chr11:98487673-98499403	Gsdma3	2.14155	2.24404	3.0897	2.14729	2.65676	2.76218	2.90415	2.10294	2.13465	2.05485	3.04735	1.99758	2.14454	2.22622	4.20243	2.02885	2.03577	2.06342	1.98288	2.05918	2.05988	2.1138	2.0873	2.03535	2.01615	2.05774	1.93107	2.30843
chr2:87989140-87990240	Olfr1167	2.41107	2.41574	2.02447	1.96122	2.69989	2.02841	2.08588	2.02739	2.4085	2.18326	2.38009	2.30853	2.38859	2.3953	2.30791	2.06701	2.12224	3.19248	2.45016	2.02233	3.24577	2.04132	2.31635	2.13665	2.39825	1.8519	2.36015	2.30485
chr6:123335279-123368079	Vmn2r20	2.39994	1.82427	2.51064	1.38184	2.47102	0.997176	1.79179	1.45375	1.98154	1.21603	4.15849	3.40105	1.65901	1.1731	3.66032	3.14267	1.34117	1.99617	3.63102	2.16799	1.83937	5.08711	2.35523	3.03131	1.42929	2.59798	1.48826	2.30324
chr19:3153798-3197703	1700030N03Rik	2.36172	2.31927	2.32523	2.36216	2.37434	2.31975	2.39337	2.37619	2.12674	2.23865	2.23048	2.06689	2.13884	2.55204	2.34989	2.34879	2.22936	2.31391	2.26165	2.28893	2.24304	2.29318	2.3465	2.37394	2.28646	2.30202	2.31111	2.30128
chr4:49456403-49463981	Acnat1	2.24933	2.31893	2.47637	2.3445	2.0687	2.18734	2.2902	2.33687	2.23305	2.48187	2.48237	2.42452	2.37893	2.67658	2.34563	2.42123	2.50681	2.17066	2.3949	2.26234	2.23357	2.42437	2.23134	1.99166	2.01312	1.95863	2.20634	2.30038
chr16:59085377-59086307	Olfr191	2.2973	2.48094	2.35299	2.23584	2.39757	2.25161	2.33169	2.23461	1.32932	2.60393	2.22817	2.56166	2.2041	1.45379	2.43331	2.52741	2.36215	2.25695	2.42578	2.46364	2.15896	2.41538	2.39559	2.49347	2.11609	2.51932	2.47288	2.29646
chr7:110398599-110401019	Dub2a	1.79498	2.18038	1.70835	2.01664	2.17255	2.01907	2.23989	2.50515	2.48158	2.84742	2.41054	2.79547	2.42615	2.61912	2.39827	2.2948	2.54183	2.12676	1.88985	2.35961	2.04419	2.66543	2.2698	2.58918	2.06215	2.37109	2.17176	2.29637
chr17:30531769-30533125	Gm6402	2.13567	1.89692	1.96639	2.64036	1.75773	1.63324	2.03242	1.99663	2.30725	3.35072	2.85566	2.12038	2.57763	2.40943	2.0661	3.59329	2.36531	2.09287	1.9362	1.90964	2.11114	2.25544	1.76177	2.7735	2.40269	2.47766	2.54358	2.29517
chr15:82233275-82237624	Cyp2d10	2.21638	2.09826	2.31583	2.14071	2.143	1.92371	2.14214	2.24927	2.19655	2.43007	2.44291	2.21359	2.36648	2.61447	2.39101	3.71657	2.16378	2.29573	2.12224	2.1466	2.17479	2.12623	1.94361	2.24149	2.23638	2.33877	2.55681	2.29435
chr10:129883254-129892950	Vmn2r86	2.17938	2.01297	2.10904	2.0638	2.13836	1.9895	2.25876	2.19585	2.01402	2.3094	4.45591	3.7591	2.20179	2.41008	2.33407	2.15958	2.12757	2.08472	2.08722	2.11013	2.1946	2.14654	2.12225	2.0617	2.01344	2.18437	2.21126	2.2939
chr5:121326150-121337607	Oas1g	2.81858	2.73108	3.47226	2.74995	2.12811	2.21305	2.50132	2.27587	3.20297	2.50703	1.24693	3.23672	3.76708	4.4759	2.14777	2.37816	2.17365	2.02986	2.22538	2.22823	2.49481	2.27045	2.13245	2.04316	0.153567	0.143556	0.148691	2.29247
chr13:62469075-62484534	Gm3604	2.23752	2.11981	1.97523	2.2282	2.22776	2.17838	2.22161	2.03417	2.35283	2.50134	2.57973	2.39217	2.25861	2.57461	2.44054	2.39493	2.7318	2.20915	2.21393	2.6772	2.1858	2.2727	2.13826	2.23111	2.21247	2.21785	2.0418	2.29072
chr8:22274328-22275277	Gm15284	1.70356	2.98361	1.24724	2.94008	1.97341	4.37961	1.82759	1.09781	4.98585	2.89398	1.42433	5.06987	2.43341	2.93404	0.450417	3.29212	1.6308	2.12753	0	2.10373	2.2303	1.70739	1.68873	2.35704	2.54505	2.72714	1.07286	2.28991
chr2:111970027-111970972	Olfr1316	1.87381	2.34118	2.56616	2.00146	1.61885	1.85642	1.71799	1.59669	1.93864	3.88746	3.97926	3.50638	1.91429	2.01277	2.09702	2.50312	2.13324	2.70893	2.66511	1.82264	2.09458	2.20145	2.06075	2.08224	2.50084	1.91167	2.19764	2.28854
chrX:151487603-151496096	Magea5	2.52307	2.43832	2.69876	2.48795	2.63315	2.3885	2.43297	2.54646	2.62481	2.10143	2.02573	2.93863	1.39324	1.9964	2.38549	1.96954	2.39498	1.08521	1.98171	2.99049	2.0219	3.14439	1.96118	3.09236	2.15299	1.05094	2.28615	2.28692
chr3:107784619-107789354	Gstm2	2.22697	2.29449	2.0395	2.46055	2.1346	2.46696	2.21857	2.20169	2.31239	2.13471	2.25874	2.10509	2.30556	2.296	2.4583	3.4839	2.21903	2.2893	2.00771	2.48586	1.98202	2.19179	2.37551	2.26955	2.08685	2.16312	2.2715	2.28668
chr2:10402874-10402947	Mir467b	1.92307	3.03333	2.5135	2.60596	2.3039	2.7343	1.86945	2.48777	1.69276	2.75913	1.24466	3.49621	3.1688	4.05807	1.91849	2.2357	1.25739	2.12321	2.13532	1.96471	2.06471	1.93443	1.92022	2.13625	2.02182	2.1401	1.99596	2.28664
chr7:32488797-32490773	Scgb2b7	2.23063	2.35777	2.32214	2.27074	2.46146	2.09352	2.41575	2.36548	2.26433	2.63398	1.34248	2.41224	2.27166	2.41433	1.5059	2.22584	2.22025	2.43412	2.35006	2.49205	2.26246	2.42505	2.27801	2.13215	2.627	2.37964	2.54093	2.2863
chr11:58394338-58395379	Olfr325	1.89652	2.23494	1.9227	2.48873	2.23184	1.74842	2.26281	2.35529	2.07066	1.87915	2.68218	2.05294	2.40457	2.67884	2.48305	2.82287	2.2741	2.90195	2.34178	2.68534	2.142	2.42716	2.63348	0.440581	2.61463	2.43281	2.61435	2.28606
chr13:50639994-50640103	Mir683-1	2.23232	1.67924	2.00053	1.65915	2.56756	2.01511	2.05582	2.15351	2.26937	2.12901	2.63669	3.52572	2.52483	2.3281	2.29489	2.32336	2.62248	2.10668	2.57878	2.42794	2.33393	2.11624	2.70725	2.47707	2.04583	1.97748	1.89285	2.28451
chr10:128824690-128825650	Olfr784	2.14416	2.31298	2.12367	2.28269	2.24519	2.13803	2.36749	2.4248	2.13205	2.70054	2.33143	2.16577	2.17101	2.41154	2.30078	2.77352	1.93935	2.25982	2.37131	2.51501	2.31165	2.40308	2.23945	2.08911	2.2087	2.46666	1.77914	2.28181
chr16:3592397-3593339	Olfr161	2.09052	3.09478	2.32196	3.57144	2.07088	3.07696	2.18215	2.14951	2.33888	0.948399	1.12484	2.14341	1.32615	2.48406	1.83082	2.27283	2.73994	2.30201	2.33072	2.20258	2.4038	2.16442	2.70957	2.60541	2.36312	2.47981	2.26304	2.28119
chr19:13659795-13660743	Olfr1484	2.25605	2.09138	1.9099	1.76994	1.85095	1.97477	2.08199	2.1395	2.61834	2.74191	2.78622	3.45033	2.10483	2.36948	2.77862	2.22288	2.27771	2.50042	2.24877	2.01583	1.70356	2.07391	2.43368	2.16143	2.14206	2.26909	2.59244	2.28022
chr17:7555252-7557045	Ttll2	2.57592	2.70464	2.12459	2.41831	1.68088	1.8115	2.04586	1.72089	2.56717	2.4148	2.17959	2.27171	2.01201	2.70988	2.16188	2.17696	2.51142	2.28366	2.24445	2.50783	2.43651	2.66308	2.04445	2.50435	1.99174	2.15384	2.57362	2.27746
chr4:88434535-88435084	Gm13285	3.42187	1.03538	3.453	0.803591	1.56701	3.68879	3.24076	1.53437	2.05643	1.88813	1.43578	2.22434	0.96667	1.03105	1.46745	3.85507	3.35241	2.62015	2.07452	2.79681	3.40391	1.53999	2.75618	2.56741	1.70191	2.31238	2.66363	2.27626
chr3:64294742-64311607	Vmn2r5	2.04876	2.07496	2.001	2.05627	2.26316	2.07428	2.81579	2.08189	2.18864	3.14801	2.1753	2.30904	2.13812	3.02075	2.25242	2.09242	3.24395	2.65824	2.13978	2.22722	2.76208	2.06865	2.07826	1.10738	2.01561	2.20255	2.15241	2.27396
chr7:5432057-5445453	Vmn2r28	2.02403	2.31708	2.15058	2.16815	2.35307	2.03004	2.0837	2.15371	2.18864	2.34273	2.27127	2.3207	2.65459	3.22642	2.34434	2.29402	2.06613	2.22057	2.28847	2.12033	2.19777	2.17692	2.18163	2.1856	2.3758	2.15018	2.45201	2.2718
chr17:8321455-8340697	Rnaset2b	2.1882	2.25882	2.38914	1.88864	2.06692	1.72981	2.34792	1.53783	2.42405	1.75263	2.07667	2.20397	1.95052	2.18932	2.0812	2.73277	2.5659	2.82064	1.54456	3.46299	1.97937	2.20285	2.97907	2.3134	2.83636	2.42231	2.34729	2.27012
chr15:63655900-63676731	Gsdmc2	1.80601	2.04569	2.24738	2.10063	2.20717	1.98376	2.31486	2.39524	2.27028	3.61281	2.00144	2.09166	1.49145	2.27608	1.35039	1.91326	1.94754	1.90461	1.30775	2.00404	2.44498	1.66534	2.40102	2.04868	3.77684	3.82852	3.84459	2.2697
chr7:31727387-31729036	Hamp	2.06595	1.70325	1.94466	2.00525	2.06934	2.15368	1.85682	2.11996	2.26653	2.24432	2.80916	2.93603	1.82088	3.21324	2.04902	2.14069	2.09925	2.17749	2.02363	2.37992	1.96881	3.85039	3.31134	2.13172	1.96471	1.91792	2.01749	2.2682
chr17:8321462-8340653	Rnaset2a	2.1856	2.25571	2.38719	1.88148	2.06591	1.72687	2.34687	1.53765	2.42111	1.74912	2.07689	2.20341	1.9495	2.18733	2.07579	2.72593	2.5611	2.81321	1.54459	3.45706	1.97564	2.19985	2.9751	2.31257	2.83267	2.41972	2.34846	2.26727
chr14:3262412-3305842	1700110I01Rik	1.60144	3.80085	5.01336	1.58406	2.44054	2.1196	2.48177	2.12891	0.487838	1.75624	1.96689	1.38884	0.805684	1.1603	1.67076	1.76017	1.76653	1.78257	2.56767	1.91863	2.13792	2.58244	2.64713	2.78199	3.64654	3.59681	3.58665	2.266
chr3:93764213-93765236	Gm10697	1.70064	1.97173	1.69629	1.73929	1.62138	1.6997	1.70682	1.94329	2.68336	1.6188	2.7057	3.20298	1.70836	2.33788	3.1784	1.75949	2.64625	2.56811	2.19103	3.79576	1.72424	3.92745	2.15947	2.01203	1.67013	3.06434	2.1269	2.26518
chr2:88025035-88025974	Olfr1168	2.07576	2.24817	2.00204	1.96786	2.35547	1.51994	2.01823	1.76669	3.28664	2.42713	1.20576	2.50478	0.911355	3.1131	2.17979	2.43692	2.44775	3.29337	2.13552	2.13523	3.4173	1.89758	2.16906	2.23018	2.46391	2.40639	2.53896	2.265
chr6:132311122-132314152	Gm8882	2.16235	2.2209	2.14756	2.00227	2.35517	2.33366	2.20037	2.20529	2.05724	1.23175	2.25643	2.4706	2.21368	2.27602	3.26482	3.16696	2.38642	2.39777	2.43951	2.01609	2.12094	2.21816	2.46032	2.26297	2.10199	2.0048	2.17886	2.26492
chr7:46662663-46668530	Gm5114	1.89104	1.97177	1.63706	1.94074	2.299	1.77504	2.48976	2.17745	1.77976	1.45891	3.55261	1.62586	1.58156	2.07534	4.79126	2.48517	2.84057	2.75453	2.69455	2.52733	1.71793	1.93668	3.04859	2.05038	2.13518	1.95611	1.95175	2.26466
chr7:5835181-5836144	Vmn1r64	2.00471	2.46979	2.4846	2.20289	2.01727	2.03917	2.00684	2.57689	1.90531	2.29918	2.33301	2.48959	2.06923	2.68461	2.00279	2.32164	2.04937	1.99041	2.17256	2.35896	2.08295	2.25888	2.41992	2.17884	2.3999	2.61519	2.70925	2.26458
chr17:34946036-34960399	C4a	2.12373	2.0405	2.031	2.09219	2.13104	2.04374	2.12187	2.16141	2.09711	3.15853	1.89166	1.94579	1.98173	2.26493	2.25457	3.03789	1.91724	2.54599	2.86085	2.2159	1.99221	3.85825	2.1276	2.14454	1.94705	2.07412	2.07187	2.2642
chr17:39673086-39677792	Gm4345	2.01517	1.99879	2.28003	2.90052	2.41811	3.27302	2.92547	2.39384	1.8723	4.86961	5.36478	1.36717	3.70922	2.49386	2.00495	2.46916	4.18596	1.00051	1.47486	0	2.01205	0	1.07026	1.00885	2.094	1.85987	1.92148	2.25866
chr7:24391193-24392108	Vmn1r170	2.49104	3.10068	2.71316	3.18302	1.83435	2.51533	2.10286	2.0693	1.91086	3.21193	1.93092	2.23926	2.12252	1.88972	1.79884	2.10144	1.95177	1.98087	2.03569	2.46959	1.85092	2.05219	2.16115	2.41697	2.30414	2.14047	2.37848	2.25768
chr13:120276063-120277191	3110070M22Rik	1.88665	2.17208	2.23012	2.14589	1.9465	2.07466	2.32703	2.5634	1.56136	1.97808	1.96007	2.86297	2.29713	1.54089	2.7619	1.61525	1.96224	2.72566	2.43337	2.68958	2.55001	2.13681	2.55487	2.07324	2.45827	2.60191	2.79902	2.25589
chr1:176066876-176067824	Olfr424	2.62934	2.15485	2.49355	2.24144	2.02494	2.04874	2.12416	2.17741	2.21479	2.05997	2.07561	2.41835	2.41886	2.21351	1.86598	2.2726	2.04818	2.58783	2.2842	2.042	2.14137	2.29429	2.40791	2.38704	2.44585	2.5626	2.23743	2.25455
chr1:176081611-176082661	Olfr421-ps1	2.34027	2.2766	2.10051	2.25286	2.03998	2.1146	2.1167	2.28914	2.19071	2.20557	2.16603	2.2475	2.24891	2.33452	2.04589	2.27701	2.3681	2.13292	2.44684	2.13452	2.16877	2.19586	2.64271	2.44129	2.21774	2.50767	2.28695	2.25149
chr7:5405428-5406361	Vmn1r59	1.96274	2.25727	2.11458	1.95758	2.22416	2.17677	2.05318	2.37867	2.10885	2.30146	2.16188	2.20072	2.95744	2.86226	2.14989	2.03489	1.93214	2.35556	1.90885	2.25586	1.97114	2.29345	3.34204	2.21166	2.06767	2.1841	2.32866	2.25013
chr7:110565209-110567688	Usp17l5	2.14733	2.155	1.59991	2.19316	2.41622	1.65541	1.86675	2.17494	2.35159	2.2128	2.4987	2.41522	2.05052	2.36938	2.43467	2.53082	2.48404	2.51229	2.22831	2.11054	2.22127	2.40371	2.06981	1.81598	2.45618	2.74621	2.62689	2.24991
chr7:38968235-38982584	1600014C10Rik	1.82333	1.95335	1.96325	1.84185	1.86841	2.0203	1.87116	1.89658	1.97639	1.91208	1.94021	1.94973	1.95878	1.798	1.87966	1.70391	3.47652	3.60644	1.79824	5.23563	1.93423	1.88717	3.56945	3.47289	1.82167	1.79056	1.78887	2.24958
chr7:92886293-92903491	Vmn2r72-ps	2.10632	2.28824	2.02618	2.06238	2.07811	2.05266	2.12826	2.04105	2.37508	2.41304	2.87923	2.54345	2.41792	2.5745	2.82883	2.70838	2.08146	2.09493	2.15485	2.08508	2.10453	2.04696	2.02602	2.09868	2.16789	2.20447	2.12252	2.24856
chr7:49864895-49897974	9830147E19Rik	2.21048	2.2314	2.17287	2.18008	2.27617	2.12861	2.23755	2.19934	2.24141	2.24523	2.27227	2.84946	2.1201	3.21268	2.30244	2.10078	2.14388	2.11718	2.19374	2.09429	2.22256	2.21567	2.26402	2.19511	2.20012	2.0368	2.02061	2.24759
chr7:147347908-147348847	Olfr522	2.04027	2.12147	2.24296	2.45443	2.3317	2.5605	1.81508	2.05216	2.26331	2.37905	2.00171	2.66248	2.06395	2.3359	2.06219	3.22648	1.92401	2.04979	2.38617	2.08906	2.16987	1.92494	2.3711	2.22828	2.47952	2.0286	2.41041	2.24724
chr7:152439827-152469832	Tpcn2	2.12829	2.24494	2.182	2.12679	2.10695	2.3117	2.06508	2.2472	2.20786	2.20216	2.3829	2.79761	2.16155	2.12832	2.31743	2.26146	3.09021	2.16961	2.17878	2.24475	2.2077	2.18395	2.16662	2.25654	2.11328	2.13788	2.03623	2.24658
chr2:181725930-181735792	Gm14496	2.15357	2.23088	2.19953	2.14384	2.51224	2.25079	2.126	2.23708	2.14548	2.49649	2.37864	2.85332	2.27676	2.45564	2.37157	2.21217	2.22004	2.18269	2.10398	2.057	2.13039	2.16203	2.10246	2.12074	2.2284	2.10478	2.13814	2.24425
chrX:10889059-10889553	Gm14484	1.84266	2.07625	2.03093	2.24201	1.37979	1.96592	2.2663	2.78897	2.24002	3.29415	2.57672	2.16002	1.58527	1.57833	3.40557	1.5506	2.87977	1.94078	2.43734	1.8158	1.68795	2.35571	2.38177	1.71946	2.9599	1.07863	4.2948	2.24205
chr7:16335718-16344623	Obox5	2.14675	2.24022	2.23808	2.28835	2.21285	2.11776	2.08469	2.1482	2.23356	2.27968	2.31336	2.20007	2.21073	2.74461	2.417	2.38119	2.19876	2.18689	2.1812	2.14776	2.26947	2.19456	2.21376	2.14246	2.0551	2.27297	2.39875	2.24144
chr8:19445769-19447606	Defb8	2.27616	1.79302	1.78925	2.23188	2.02371	2.193	2.21973	2.1899	1.86212	2.34333	2.15088	2.14343	2.10784	2.26848	2.12139	1.95288	1.83775	2.13761	1.97616	2.46067	2.18009	4.26392	2.04239	3.16942	2.47495	2.04547	2.25601	2.24116
chr7:34149361-34151338	Scgb2b20	2.04662	2.59717	2.60124	2.0639	1.57547	1.64508	2.434	2.34467	2.13549	2.74527	1.9259	2.31844	2.79451	2.57964	2.11546	2.26352	1.71895	2.18263	2.38039	2.43589	2.4386	2.49188	2.03628	2.54557	2.0218	2.0842	1.98151	2.24089
chr4:101613011-101615788	Gm12794	2.32511	2.23793	2.386	2.35365	2.36477	1.18899	2.15498	2.5456	2.37444	2.25392	2.33553	2.63195	2.23876	2.59669	2.35065	2.19975	2.20198	2.21364	2.20533	2.01843	2.33266	2.11133	2.28468	2.07485	2.14942	2.16042	2.20206	2.2405
chr19:12315210-12316149	Olfr262	2.11637	2.21334	2.40586	2.23565	2.40996	2.14322	2.12855	2.22306	1.76679	2.42863	2.35638	2.33262	2.00263	2.44513	2.09127	2.16655	2.20425	2.39398	2.17789	2.03099	2.09004	2.26993	2.18359	2.01395	2.51908	2.41301	2.71835	2.24004
chr7:38968805-38982584	1600014C10Rik	1.80121	1.94877	1.94913	1.83792	1.85126	1.99995	1.83661	1.89274	1.94565	1.91189	1.93355	1.95083	1.93873	1.79149	1.86592	1.69929	3.48877	3.61019	1.80332	5.21928	1.92634	1.88615	3.55824	3.44994	1.8226	1.76252	1.78544	2.23955
chr11:101303558-101306910	Rpl27	2.0287	2.31192	2.43088	2.41223	2.17275	3.89453	2.33875	2.1584	2.14839	2.21581	2.2648	1.97703	2.21925	2.05272	2.37284	2.24249	2.03495	2.27482	1.82152	2.24058	2.17872	2.16759	2.10525	2.07926	2.09187	1.95517	2.27175	2.23937
chr5:146666182-146691430	Cyp3a11	2.15958	2.04849	2.12648	2.1867	2.25839	2.02525	2.22711	2.1495	2.26263	2.31155	4.37864	2.21326	2.17349	2.51514	2.20715	2.18672	2.03998	2.09416	2.09436	2.07752	2.08404	2.12664	2.07518	2.02597	2.17526	2.11764	2.10458	2.23872
chr7:51443632-51447821	Klk1b24	2.21949	2.26908	2.01813	1.95343	2.24881	2.30557	2.19245	2.13786	2.462	2.52949	2.46372	2.40541	2.33501	2.51864	2.52263	2.5045	2.40394	2.22244	2.12558	2.13334	2.16721	2.10112	2.16852	2.2051	1.88617	1.77586	2.13072	2.23727
chr19:8410112-8479595	Slc22a30	1.31337	2.28926	2.27973	2.23879	2.22723	2.23811	2.28262	2.3317	2.17529	1.27319	2.21008	2.11904	2.20639	2.69415	2.36187	2.27679	2.1955	2.2278	2.26618	4.19845	2.21259	2.31543	1.29903	2.30514	2.23251	2.22822	2.33162	2.23445
chr7:51268080-51272338	Egfbp2	1.37553	1.87863	2.02453	2.2301	2.38409	2.10803	2.33599	2.34961	2.27379	2.41587	2.56328	2.62493	2.2723	2.45913	2.47679	2.19076	2.19526	2.13148	2.295	2.35709	2.26792	2.3884	2.05856	2.24621	2.09613	1.97366	2.30355	2.23247
chr7:39047838-39056367	Pop4	1.97559	2.13742	2.08653	2.02068	1.91973	2.15622	1.99236	2.07357	1.94606	1.81387	2.08167	2.0886	2.0747	1.73136	1.97499	2.00529	2.93151	3.16653	1.84933	4.08726	2.10014	2.01762	3.07123	3.10935	1.8753	1.91486	2.07217	2.23237
chr15:79908932-79909009	Snord83b	2.08707	2.0289	2.2809	2.77108	2.29657	2.36755	1.49605	1.75146	1.92427	2.89878	2.92545	1.85499	2.71775	2.07754	2.84689	2.21476	2.22281	2.77421	2.69364	2.68887	2.21568	2.30541	2.04694	1.88488	1.35701	1.51098	2.03199	2.23231
chr7:51268047-51272335	Klk1b26	1.37781	1.87701	2.02102	2.22708	2.3881	2.10601	2.33832	2.34448	2.2737	2.41351	2.5643	2.62234	2.27439	2.46138	2.47701	2.18883	2.19339	2.13323	2.29374	2.35393	2.27133	2.38644	2.05469	2.25099	2.09428	1.97718	2.30005	2.23202
chr17:20166388-20185169	Vmn2r104	2.07673	2.0159	1.98361	2.07711	2.15568	1.9048	2.05318	2.0639	3.0575	3.09558	2.1322	2.14825	2.05041	3.29157	2.05038	3.16075	2.06968	2.0127	2.13715	2.06839	2.07101	2.15343	2.08853	2.0276	1.99918	2.11262	2.20573	2.23198
chr2:177677315-177691994	Gm14326	2.88022	1.52705	0.84028	1.81154	1.86689	1.13044	1.27736	2.19813	2.15371	2.62372	3.42049	3.22393	2.30823	2.26346	3.68123	2.75473	2.53007	3.067	3.61397	1.72656	1.71542	2.49859	1.13281	0.607877	2.6294	2.45053	2.32228	2.2317
chr17:13301482-13324657	Unc93a	1.62821	1.82564	1.59875	1.82	2.51847	2.10438	1.69421	2.25292	2.2616	3.19997	2.91444	2.06736	2.30638	3.18318	2.94695	1.76304	2.11099	1.86012	2.54405	2.08004	1.82741	2.40303	1.88635	2.61696	2.10805	2.34039	2.35442	2.23027
chr8:22619727-22620709	Defa20	0.554372	0.317846	0.63515	0.431341	0.143893	13.0276	0.782807	0.518101	0.0313134	0.36945	0.871557	0.432309	0.345391	0.233373	0.278967	3.21432	0.372121	2.29727	4.93098	2.71705	4.55571	4.87614	4.06444	4.02039	3.96902	3.97813	2.241	2.23
chr2:87593212-87594148	Olfr1141	2.1663	2.35765	2.31241	1.92367	2.15869	1.94734	2.15431	2.08622	2.17611	2.06487	2.4327	2.1813	2.33574	2.21622	1.89036	2.18224	2.14512	2.29815	2.20634	2.13975	2.06871	2.50036	2.26706	2.48358	2.16904	2.63295	2.69967	2.22951
chr19:39683348-39723532	Cyp2c67	2.11529	2.15149	2.1273	2.10509	2.20566	2.05722	1.70568	2.16144	2.10889	2.2203	2.20524	2.07392	3.25661	2.53603	2.46269	3.11528	2.13561	2.15433	2.14557	2.11189	2.08505	2.12915	2.13194	2.13166	2.21342	2.13684	2.2127	2.22949
chr4:114971650-115005420	Cyp4a12a	2.08716	2.00023	1.97667	1.93526	2.13511	2.00352	2.06696	2.05162	3.03807	2.04742	2.073	2.11564	3.06601	3.54057	2.26065	2.10647	2.02455	2.09085	2.22662	2.18396	2.14288	2.22628	2.23844	2.15936	1.99867	2.22271	2.15357	2.2286
chr17:35402723-35462354	LOC547349	2.84921	3.50197	1.8668	2.11081	1.67904	1.71841	2.0504	1.69531	2.21229	2.27377	2.28704	2.23823	2.43313	1.79584	4.31551	2.01543	2.11751	3.62229	3.38076	1.50416	1.43202	0.814485	1.73901	2.27532	2.01096	2.04544	2.16862	2.22792
chr5:147313952-147328478	Gm3415	2.39213	3.81172	1.54479	1.32093	5.1825	1.69452	4.74487	3.50671	1.88238	2.82519	1.23976	0.943712	1.80679	1.93248	1.49393	1.4532	1.75539	1.97777	1.21433	3.51018	1.43863	2.31102	4.91239	1.92493	1.0022	1.15569	1.14419	2.22675
chr2:87577543-87578479	Olfr1138	1.97186	2.08131	2.55048	2.13801	1.71843	1.86565	2.22323	2.2949	2.17301	1.98016	2.43635	2.67979	2.38741	2.19048	1.98137	2.38245	2.24126	2.13839	2.1527	2.13229	2.32751	2.27315	2.00746	2.07231	2.48388	2.30637	2.92768	2.22659
chr7:51480806-51484987	Klk1	2.11936	2.19802	2.11067	2.14509	2.32059	2.01406	2.10116	2.30272	2.44182	2.35386	2.19943	2.27539	2.38793	2.51225	2.25535	2.18307	2.29086	2.29982	2.27129	2.18401	2.02076	2.23843	2.18244	2.1422	2.04768	2.12994	2.38908	2.22657
chr7:10622583-10638527	Vmn2r50	1.07298	2.9759	1.63079	2.1315	3.07372	1.70884	1.034	2.07372	2.68857	1.78841	2.08487	2.33037	2.47923	2.25101	2.45591	2.2263	1.80252	2.87716	2.28186	1.86732	2.08256	2.10499	1.87805	1.94597	3.09427	3.10545	2.9767	2.22307
chr7:111701397-111702466	Olfr651	2.09641	2.2016	2.20753	2.25184	1.99223	1.88083	2.22467	2.28306	2.55366	2.03647	2.15738	2.39537	1.96537	1.96964	1.95788	2.07142	2.03915	2.31971	2.29963	3.39849	2.25855	2.42739	2.24248	1.96985	2.28419	2.40628	2.09738	2.22179
chr19:13961750-13962698	Olfr1504	2.01517	1.9791	2.06479	2.05712	2.38482	1.97883	2.24728	2.06254	2.38139	1.84978	2.07218	3.25962	2.66839	3.30333	1.96507	3.17851	2.01828	1.88427	2.36097	2.07933	2.20917	1.78788	2.01109	1.95851	2.28899	2.29217	1.62246	2.22152
chr17:23521769-23538831	Vmn2r116	2.26659	2.24061	2.1471	2.20158	2.22508	2.19933	2.09624	2.34348	2.11645	2.25513	2.17875	2.23414	2.10593	2.50435	2.26128	2.37609	2.23099	2.17455	2.07913	2.33135	2.1928	2.21105	2.22659	2.23405	2.14243	2.11114	2.25935	2.22021
chr6:43065742-43066675	Olfr441	2.2016	2.18952	2.37925	2.347	2.45086	1.74178	2.08952	2.05476	2.13813	2.24939	2.2481	1.17394	2.23989	2.29676	2.38429	2.6509	1.94188	2.23234	2.63357	2.66697	2.34667	2.37952	2.29301	1.97705	1.6009	2.25547	2.73409	2.21841
chr7:11332850-11334887	Vmn1r71	2.24764	2.24025	1.943	1.89829	1.69376	2.03362	2.00581	2.38762	2.11444	1.91297	3.34515	2.97228	2.08177	2.03272	2.12226	2.17183	2.08407	2.19963	2.37297	2.23737	2.28629	2.37277	2.34781	2.22569	1.87331	2.39656	2.25362	2.2168
chr7:24362203-24363118	Vmn1r169	2.295	2.14779	2.20614	1.96272	2.02008	1.83413	1.97726	2.30336	2.52515	2.48305	2.13231	2.5211	2.27203	2.50866	2.40964	1.97779	2.26419	2.24769	2.48652	1.98157	2.14934	2.3559	1.70646	2.40609	2.28446	2.10983	2.27414	2.21639
chr17:7568060-7589654	Gm9992	2.36913	2.53919	1.69846	1.81196	2.6076	2.50967	1.92123	2.20709	1.89698	2.55232	2.42124	2.08707	2.39608	2.64862	2.06027	1.82754	2.10582	1.93275	2.40882	1.99128	1.86616	2.02794	1.86364	2.26478	2.54721	2.60471	2.66932	2.21618
chr15:9265352-9300625	Ugt3a2	2.19992	2.18624	2.18661	2.01233	2.14985	1.97506	2.14862	2.11094	2.28307	2.34524	2.38029	2.31072	2.35572	2.69872	2.48176	2.48938	2.05381	2.1441	2.10733	2.0511	2.18244	2.32568	2.20412	2.07688	2.14288	2.1089	2.10701	2.21551
chr2:86285169-86286161	Olfr1065	2.87353	2.39423	2.06249	2.29997	1.77405	2.10036	2.38796	2.3397	2.02325	1.78281	2.24306	2.0839	2.25822	2.39548	1.98758	1.93972	2.68475	2.28898	2.41584	2.29222	2.37176	2.11919	2.14923	2.12528	2.16797	2.05072	2.2026	2.21536
chr19:39841562-39887304	Cyp2c40	2.15827	2.20184	2.00885	1.97909	1.78336	2.02146	2.17754	1.35727	2.07449	2.24058	2.23349	2.17634	2.18466	3.30343	2.29898	3.01606	2.14347	2.13652	2.13202	2.11743	2.11351	2.09368	3.1468	2.16922	2.14619	2.22783	2.16623	2.21513
chr2:36245430-36245515	Mir684-1	2.53305	2.41156	2.15106	2.36487	2.38484	2.52801	2.13937	2.32603	1.95237	1.8036	1.86323	1.83719	2.81695	3.5972	2.11657	1.81648	2.24031	2.20491	2.33621	2.01434	2.00225	1.7277	2.56872	1.89376	1.86498	1.96588	2.33346	2.21463
chr19:40164168-40188445	Cyp2c50	2.22806	2.11735	2.19509	2.17463	2.28584	2.18347	2.21336	2.1819	2.01182	2.11958	2.14343	2.09706	2.13105	2.46595	2.15652	2.18853	2.26988	2.32358	2.47563	2.28547	2.31594	2.21728	2.21682	2.29266	2.02164	2.2938	2.17524	2.21413
chr7:51453560-51457721	Klk1b3	2.36359	2.13012	2.07694	2.343	2.37342	2.08877	2.25395	2.0566	2.2213	2.25331	2.14608	2.2948	2.10301	2.48172	2.31353	2.1211	2.18886	2.06939	2.07826	2.17409	2.07891	2.357	2.2249	2.20668	2.32605	2.27666	2.17898	2.21411
chr9:37854808-37855738	Olfr884	2.20077	2.13229	1.19766	2.30608	2.53084	2.41764	2.45678	2.34529	2.36177	2.36779	2.14112	2.11878	1.74773	2.276	2.01817	2.11624	1.94895	1.99638	2.28083	2.18946	2.39335	2.0479	2.19593	2.16516	2.49122	2.61093	2.67879	2.21236
chr9:78137734-78153332	Gm10639	2.05893	2.34275	2.24601	2.04842	2.19746	2.1218	2.16132	2.0429	2.32938	2.58474	2.12114	2.21406	1.29693	2.54578	2.28855	2.47746	2.24857	2.38279	2.45491	2.34345	2.309	2.28938	2.2677	2.24534	2.08183	1.97522	2.04714	2.21196
chr9:88734001-88743028	Trim43c	2.21366	2.00877	2.45194	2.30534	1.95128	2.79546	2.10227	2.23866	2.58694	3.20314	2.54905	2.37872	2.12055	3.59118	2.1197	2.96821	1.72427	1.91179	0.404278	1.94117	2.60937	1.7224	1.93508	1.71681	2.02698	1.99093	2.12743	2.21094
chr7:19371650-19374763	Sycp1-ps1	2.21992	1.09145	1.08668	2.08495	2.02007	1.02527	2.28034	3.29229	2.02259	2.128	1.98833	2.15168	2.20883	2.22646	2.13534	2.20095	2.66515	3.21349	2.12414	3.45202	2.36311	2.41298	2.19074	2.18134	2.31704	2.46923	2.12515	2.21028
chr7:115302431-115303385	Olfr485	2.05454	2.05154	2.7475	2.17979	2.18979	2.14661	2.18297	2.23445	1.85467	2.25906	2.71628	2.32916	2.21995	2.42535	2.22642	2.26788	2.2197	2.39889	2.29994	2.61003	2.25686	1.91577	1.82839	2.91309	1.71212	1.30481	2.12043	2.20985
chr1:21373636-21376465	Khdc1b	2.4615	2.00337	2.06547	2.09193	2.20145	2.55002	1.85704	2.41652	2.18817	2.02022	2.26083	2.10545	2.45574	2.10225	2.18267	2.40724	2.18683	2.21448	1.99004	1.99033	2.66414	1.98758	2.36563	2.31144	2.23527	2.3035	2.01486	2.20867
chr9:37833392-37834322	Olfr883	2.07288	2.15434	0.952551	2.41655	2.27948	2.24358	1.99585	2.42216	2.14915	2.19348	2.19872	2.51383	2.13906	2.10827	2.19328	2.5799	2.3511	2.26233	2.25464	2.23573	1.98638	2.02662	2.30368	2.32467	2.51388	2.40535	2.35522	2.20862
chr4:143860535-143870369	Pramel5	2.16387	2.17355	2.15252	2.15678	2.23722	2.108	2.25959	2.18039	2.15057	2.14489	2.24695	2.21143	1.20068	2.14322	2.30467	3.07786	2.19812	2.28939	2.39345	2.13168	2.26159	2.25344	2.26815	2.21448	2.18101	2.15036	2.32488	2.20662
chr17:36501948-36505362	H2-M10.3	2.27038	2.16742	1.70996	2.3111	2.14996	2.14921	3.07834	2.19967	2.14826	2.18856	2.37044	1.93642	2.18138	2.12895	2.13065	2.13972	2.24862	2.03191	2.24986	2.30573	2.09139	2.23167	2.20439	2.23272	2.07867	2.31286	2.31155	2.20592
chr7:10034292-10041283	2810047C21Rik1	0.848959	3.71188	1.68514	2.79748	3.76842	1.13597	0.852843	2.49288	2.42172	2.43358	1.55751	1.41547	3.00398	2.67827	1.30752	1.84407	1.48402	2.52541	2.433	1.44188	1.67681	1.89684	1.35225	1.66009	3.66037	3.81782	3.64792	2.20563
chr9:35548633-35549837	Gm17677	2.33634	2.07338	2.20773	2.07422	2.10972	2.13319	2.24977	2.43612	1.90558	2.15996	2.55596	2.42448	1.98461	2.06091	1.98052	2.32607	2.13045	1.99649	2.29051	2.04605	1.99496	2.35573	2.52312	2.26471	2.14763	2.37035	2.40641	2.20537
chr7:149489406-149490408	Krtap5-4	2.0174	2.18461	2.05473	2.03759	1.73652	2.18986	2.44093	2.54952	2.23769	2.44502	2.18925	1.97414	2.32442	3.02741	2.10402	1.98182	2.07451	2.54945	1.76403	2.13779	2.23091	2.30176	2.34324	2.30788	1.91223	2.15745	2.22052	2.20351
chr7:49700831-49703450	4933421I07Rik	2.38942	2.09966	2.36903	2.06813	2.41574	2.03582	2.06973	2.2886	2.05747	2.21386	2.32378	2.22412	2.18435	2.43913	2.14487	1.90247	2.04889	2.22725	2.06132	2.34091	2.30595	2.2036	2.42545	2.14582	2.32455	2.24126	1.93517	2.2032
chr7:32497683-32498999	Scgb1b7	1.95069	2.21081	2.05227	2.22178	3.16719	2.03246	2.15617	1.95873	2.098	2.22861	1.13934	1.73314	4.00564	2.7366	1.74453	2.13178	2.54066	2.30617	2.34501	2.21976	2.17881	2.40571	1.75545	2.39252	1.64873	1.88674	2.21398	2.20227
chr9:38306255-38307188	Olfr907	2.39986	2.14181	2.078	2.19923	2.2964	1.75973	2.07195	2.16757	2.1014	2.41062	2.48938	1.97998	2.1943	2.20874	2.17845	2.1857	2.50676	2.13995	2.13882	2.24474	2.32137	2.33765	2.53634	2.40458	1.82615	2.25367	1.88752	2.20225
chr10:129511467-129512406	Olfr822	2.38024	2.28538	2.10691	2.44098	2.26774	1.83294	2.31579	2.37191	2.08575	2.13472	2.10546	2.45523	2.57411	2.53041	2.45641	2.11927	0	2.13262	2.44615	2.10229	2.42459	2.36807	2.61179	2.33346	2.09203	2.25845	2.2183	2.20189
chr7:34522211-34524314	Scgb2b24	2.24186	1.92145	2.31581	1.88706	2.23964	2.1303	2.46285	1.97992	2.2425	2.08445	2.9447	2.32689	2.03575	1.96183	2.24427	2.09348	2.14824	1.22708	2.6782	1.76869	2.00663	2.50447	2.07375	2.46313	2.84327	2.45817	2.15554	2.20148
chr2:88114265-88115204	Olfr1173	2.08443	2.00103	2.84141	2.19129	2.32637	2.29228	2.3316	2.79365	2.03416	2.11955	2.1445	2.30901	1.94038	2.35373	2.0438	2.3168	2.23599	2.26413	2.1352	2.04161	2.24766	2.29538	2.37485	1.81778	2.46265	2.26511	1.1673	2.20117
chr6:66726215-66727124	Vmn1r38	2.08519	2.17723	1.97736	1.98038	2.10167	1.64128	2.1607	2.14642	1.65788	2.24951	2.30005	2.18895	3.34709	2.12593	2.43424	2.45242	2.07666	2.23391	2.1876	1.99012	2.30412	2.24143	2.49611	2.37506	2.18191	2.10086	2.17168	2.19947
chr2:86262875-86263831	Olfr1062	2.88797	1.939	2.44665	2.11572	2.87497	1.94848	2.75046	1.72102	2.0193	2.45699	2.32307	1.19908	2.01682	2.32223	1.7289	2.15161	2.33856	2.54051	2.25244	2.03567	2.63073	2.00663	2.20364	2.58008	2.11947	1.75535	1.9974	2.19862
chr18:90679545-90712659	Tmx3	2.24273	2.13313	2.41439	2.31101	2.35773	2.35995	2.1744	2.31088	2.37808	1.9436	2.36757	2.87627	2.25556	2.15592	2.01565	2.14408	1.98911	2.04741	2.01758	2.04929	2.19787	2.06332	2.02012	2.05524	2.2444	2.07992	2.11514	2.19705
chr17:53855833-53873168	4932415M13Rik	2.03023	2.13806	2.16778	2.07309	2.15598	2.09424	2.14112	2.14634	2.14408	3.25983	2.19699	2.26222	3.33564	2.31653	2.23396	1.10682	2.13381	2.01386	2.26935	2.10206	2.14697	2.14068	2.12053	2.15779	2.17556	2.08699	2.15744	2.19659
chr7:111712665-111713726	Olfr652	2.03342	2.45295	2.17375	2.30293	2.36879	2.08526	2.25608	2.19065	2.12687	2.07047	2.19154	2.15635	2.29929	2.252	1.81977	1.76615	2.35856	2.21866	1.93277	3.08773	1.89749	2.14096	2.3434	2.08803	2.55955	2.25069	1.88179	2.19651
chr7:152391722-152394024	1810010D01Rik	2.23985	2.53835	2.19827	2.19543	1.92181	2.36281	2.28153	2.05511	2.10858	2.23268	2.61806	2.33735	2.13945	2.26076	2.20456	2.13833	2.28934	1.85491	2.20394	2.16684	2.51902	1.97379	2.05977	1.9853	2.32891	2.03849	2.03833	2.19598
chr2:86516555-86517488	Olfr1086	2.23468	1.87492	2.10715	2.25552	2.01249	2.30625	2.33512	2.3548	2.24207	1.90431	2.47215	2.58379	2.16656	2.52825	1.02102	2.505	2.32641	2.26598	2.37915	2.50841	2.40055	1.74712	2.01973	2.11741	2.17745	2.36887	2.06234	2.19546
chr6:90219099-90220047	Vmn1r54	2.07882	2.53155	2.07863	1.97684	2.07754	1.83508	2.09599	2.23929	2.26341	2.27014	2.24417	2.34396	2.57465	2.21909	2.31735	2.12603	1.91106	2.28419	2.38049	1.878	2.66155	2.46271	1.82229	2.13446	2.11317	1.94114	2.41401	2.19539
chr4:61176624-61180518	Mup16	1.56706	1.1831	1.40509	1.21584	1.18745	2.95795	1.14981	1.92153	1.55657	1.92722	1.61747	1.97954	0.980929	1.21254	1.66874	1.05578	3.29001	4.89333	5.26854	1.20787	2.21727	3.15872	5.19357	2.73602	2.04405	2.48755	2.1784	2.19489
chr1:175522087-175529405	Pydc4	1.76677	2.7362	1.99285	2.36013	2.82173	2.10109	2.45763	2.03048	3.03119	2.41568	3.04927	3.28919	1.8901	2.50021	2.33062	2.25955	1.90434	2.09333	2.36136	2.46497	2.03147	2.36252	2.07778	2.05642	0.995715	0.923604	0.912886	2.19323
chr15:74875444-74879267	Ly6c1	2.34184	2.24804	2.29064	2.37447	2.33901	2.25467	2.45767	2.33614	2.22816	2.30433	1.80013	2.27938	2.21027	1.873	1.63667	1.76619	2.2328	2.49571	2.26264	2.08339	2.3864	2.13687	2.1814	1.86066	2.36954	2.26543	2.16456	2.19185
chr6:57958176-57959196	Vmn1r26	2.2112	2.39792	2.15429	2.04424	1.96136	2.19154	1.86967	2.13025	2.00206	2.04549	2.08919	2.05331	2.18193	2.30513	3.16289	2.38077	2.51757	2.01779	1.89814	2.36191	2.1952	2.16636	2.15409	2.19764	2.70185	1.82603	1.96065	2.1918
chr2:10422453-10422526	Mir467a-1	1.16994	3.01524	2.1121	2.39871	2.44109	1.18808	2.1188	2.48267	1.3881	0.84223	3.33836	1.19578	2.66886	0.0875942	2.51276	2.00138	2.5957	2.58151	2.41576	2.92892	3.21885	2.34335	2.69991	2.76216	2.16325	2.23507	2.26509	2.19153
chr2:10422448-10422531	Mir467a-2	1.16994	3.01524	2.1121	2.38665	2.44109	1.19305	2.1188	2.48267	1.3881	0.825512	3.2841	1.19578	2.66886	0.092006	2.5206	2.02497	2.59007	2.60653	2.42767	2.92892	3.21885	2.34335	2.69991	2.76216	2.16325	2.23507	2.26509	2.19112
chr7:15050507-15078275	Sult2a7	2.16598	2.13904	2.12999	2.0923	2.25801	2.0611	2.12798	2.09585	2.00894	3.20939	2.20393	2.21404	2.18354	2.24972	2.14069	2.13293	2.05577	2.18735	2.22518	2.22437	2.1344	2.10957	2.21009	2.21728	2.17321	2.06879	2.13881	2.19105
chr17:33336006-33336954	Olfr239	1.84481	2.28731	2.48748	1.84302	1.42069	1.05537	2.33086	1.6659	3.65144	2.40412	1.94826	1.89361	2.14045	3.27504	1.88227	2.46761	2.33782	2.13036	2.38354	2.92184	1.8874	2.30725	1.76919	2.16931	2.11964	2.22063	2.31215	2.19101
chr9:35452697-35455787	Gm17365	2.1891	2.26491	2.13869	2.32019	2.24703	2.35079	2.03029	2.24189	2.319	1.85062	2.18887	2.47534	2.18105	2.44525	2.01665	1.99079	2.25795	1.94739	2.08307	2.1722	2.33613	2.20681	2.08976	2.01454	2.22032	2.3217	2.25381	2.19089
chr7:111029819-111030755	Olfr66	2.40759	2.03624	2.0858	2.11729	2.17646	2.01202	2.45156	2.21282	2.16317	2.11634	2.55533	2.27607	2.32405	2.7248	2.16563	1.96699	1.6224	2.29844	2.1944	2.51202	2.10715	2.44658	2.16896	2.17921	2.26173	1.59133	1.94587	2.18964
chr5:110362581-110370729	LOC100642166	2.22125	2.31202	2.11764	2.23911	2.36605	2.16871	2.25096	2.26892	2.10172	2.32594	1.27125	2.11091	2.03331	2.4027	2.35392	2.28447	2.22667	2.20483	2.20448	2.25134	2.1555	2.25753	2.30646	2.4314	2.22052	2.08764	1.94326	2.18957
chr4:120988920-120997522	Gm12888	2.03923	2.13187	2.06791	2.15641	2.26765	2.1768	2.11822	2.01433	2.20343	2.08615	2.26573	2.13554	2.56725	2.44132	2.29726	2.45789	2.1315	2.17849	2.12377	2.03814	2.14626	2.17396	2.1697	2.13248	2.21312	2.18868	2.18472	2.18918
chr4:144203609-144213301	Gm13177	2.06821	2.07604	2.09416	2.12456	2.27331	1.88832	2.05623	2.09358	2.10518	2.04841	3.13635	2.25109	2.02441	2.04801	3.15087	2.05299	2.07685	2.13705	2.19152	2.20191	2.18485	2.19356	2.045	2.18786	2.01551	2.18348	2.18786	2.18878
chr2:87845973-87846933	Olfr1160	2.13231	2.10493	2.08738	2.11518	1.84232	2.12485	1.25021	2.13072	2.34609	2.39575	2.19466	2.58251	2.01528	2.02972	2.57028	2.35426	2.12066	2.35812	2.35479	2.60367	2.50427	2.00431	2.42006	2.14252	2.15135	1.86704	2.20934	2.18565
chr7:18933550-18940342	Psg18	2.06479	2.10509	2.21996	2.10945	2.19994	1.80581	2.27357	2.24378	2.07139	2.13216	2.15935	2.35603	2.18104	2.52643	2.14168	2.1158	2.1375	1.97965	2.27592	2.2016	2.18663	2.11841	2.19858	2.23518	2.20087	2.34201	2.42294	2.18539
chr7:16132605-16142195	Obox1	1.90028	1.83492	1.82982	2.18178	2.09784	1.82933	1.93493	1.92764	2.10371	2.72892	2.08006	2.10504	2.53113	2.16929	2.12777	3.90867	2.06114	2.92792	2.23794	2.25556	1.8288	2.3614	2.34397	2.25503	1.77502	1.85284	1.80345	2.18497
chr3:159262144-159288271	Rpe65	2.18976	2.20968	2.15726	2.18755	2.22989	2.10724	2.18009	2.20582	2.15578	2.12614	2.31267	2.40616	2.13855	2.27124	2.22882	2.1954	2.14616	2.15074	2.15448	2.14345	2.19501	2.15661	2.11634	2.16016	2.16467	2.15978	2.14254	2.18489
chr2:89449245-89450310	Olfr1247	2.44879	1.96149	1.93512	2.08885	2.14953	1.80679	2.29454	2.20542	2.1958	2.85308	2.51534	2.37083	2.31035	1.71646	2.4713	2.22748	1.91357	1.96814	2.36335	2.12886	2.09693	2.04666	2.00007	2.20957	2.3373	2.26099	2.08752	2.18386
chr13:62862098-62862206	Mir713	1.55791	1.98371	1.94412	2.45879	2.34018	2.01924	1.44984	2.17841	2.49003	1.94587	2.85408	2.54764	3.3247	2.19474	1.87686	1.66712	1.63653	1.83587	2.17677	2.63329	2.26966	2.47758	1.72049	2.06004	2.368	2.54616	2.3945	2.18341
chr2:86478921-86479875	Olfr1084	2.15618	2.16324	2.13459	2.08955	2.27649	1.96815	2.13539	2.45017	2.43608	2.14495	1.95767	2.44413	1.88228	2.28829	2.3837	1.89042	2.26073	2.13502	1.96006	1.75591	2.10733	2.1604	2.35768	2.55423	1.88183	2.48077	2.47927	2.18276
chr11:21394732-21411183	4932414J04Rik	2.22921	2.07031	2.21455	2.19032	2.13809	2.01972	2.17402	2.2147	2.15756	2.32404	2.0929	2.17761	2.46777	2.37632	2.1885	2.20609	2.28017	2.22708	2.16071	2.10407	2.18217	2.07009	2.22421	2.11057	2.10819	2.15127	2.04674	2.18174
chr7:5146517-5148349	Vmn1r56	2.17357	2.14146	2.17994	2.12629	1.87113	2.26594	1.86583	2.09093	2.0926	2.04657	2.17341	2.18572	2.17478	2.39483	2.30831	3.58522	2.03067	1.99267	1.88415	2.06385	2.24861	1.91382	2.16524	2.30631	2.09105	2.42121	2.09911	2.18123
chr2:36232297-36233218	Olfr338	2.40065	2.35364	2.16657	2.36504	1.89515	2.0373	1.93741	1.99868	1.99876	2.24138	1.81717	2.21332	2.04877	2.6805	2.15111	2.22581	2.29774	1.96185	2.35047	2.17467	2.09352	2.15496	2.15665	2.09899	2.03827	2.87603	2.13087	2.1802
chr3:94464510-94471074	BC021767	2.22092	2.26597	2.19532	2.01266	1.96692	2.33274	2.12961	2.13968	2.2417	1.73864	2.40654	2.77072	2.06773	2.27095	1.99999	2.09864	2.32257	2.13312	2.14733	2.47925	2.36961	2.98399	2.16628	2.00677	1.77898	1.70388	1.88258	2.179
chr7:27396137-27397097	Vmn1r185	2.0231	2.01511	1.84284	2.32459	1.7733	2.36037	2.42333	2.04553	2.17129	2.05374	2.37635	2.26907	2.20083	2.39787	1.99969	3.11217	1.95016	2.10926	2.33812	2.28981	2.06794	2.30798	2.46471	1.99427	2.06193	1.92568	1.91245	2.1782
chr7:7624539-7642109	Vmn2r34	1.22002	3.28886	2.0088	2.1868	2.5283	1.002	1.31038	1.57636	2.49976	2.09676	2.49717	2.8722	2.75893	2.70529	2.29597	2.6187	1.59875	2.62639	3.04338	1.67608	2.29609	2.98998	1.72477	1.61281	1.96773	1.89697	1.89081	2.17741
chr7:32075537-32076835	Scgb1b2	2.27599	2.4432	2.08983	1.83872	1.95533	2.20387	2.11915	2.19918	2.21002	2.12859	2.23774	2.35299	1.97961	2.47663	2.06641	2.53676	2.08549	1.97874	2.09268	2.19577	2.09226	2.46407	2.01235	2.06646	2.22325	2.24847	2.1911	2.17647
chr7:147787238-147797023	Olfr46	2.15429	2.10088	2.21269	2.11321	2.14518	1.96763	2.18713	2.17263	2.08873	2.27011	2.15248	2.23518	2.23697	2.45968	2.13546	2.10393	2.29723	2.1616	2.19565	2.10199	2.20817	2.13955	2.23515	2.20198	2.11891	2.17064	2.19478	2.17636
chr12:112779156-112779277	Snora28	2.27836	1.90155	2.01016	2.2809	2.55079	1.85747	2.23957	2.56484	1.60323	2.00575	2.4211	2.11113	2.02606	1.81787	2.19211	2.08707	2.26568	2.58208	1.75075	1.83638	2.75838	2.39885	2.0707	2.63499	2.10074	2.09126	2.32392	2.17636
chr16:15848533-15863415	Mzt2	2.05113	2.09841	2.01401	2.11416	2.17978	2.18427	2.0657	2.04729	3.26438	2.01293	2.0342	2.00494	2.05182	3.21718	2.24129	2.06242	2.11798	2.16604	2.03546	2.06933	2.09756	2.13057	2.00268	2.04921	2.09592	2.20959	2.11155	2.17518
chr2:86975537-86976476	Olfr1110	1.80068	1.92739	1.86768	2.22689	1.9992	1.76183	2.25205	2.35177	2.04443	2.44678	2.0809	2.46281	1.938	2.29038	2.28076	2.4905	3.35229	2.26446	1.92693	2.00936	1.80099	1.9899	1.96676	2.0276	2.0953	2.88728	2.18152	2.17498
chr11:73238538-73241979	Olfr378	2.03716	2.259	2.10965	2.07125	2.10518	1.96704	2.10095	2.1569	3.51032	1.10467	2.281	2.40339	2.2098	3.38725	2.03352	1.02421	2.27193	2.24897	2.26444	2.29327	2.22466	2.18843	2.19631	2.11876	1.88519	2.12961	2.13884	2.17488
chr4:143243662-143247149	Gm13088	2.14181	2.08912	2.09387	2.22513	2.17112	1.79871	2.12875	2.1721	2.12124	2.38163	2.24748	2.11301	2.63227	1.8934	3.61542	2.09433	2.05619	1.91714	2.18268	2.07963	2.02919	2.03053	2.20967	2.10295	1.77614	2.25714	2.16006	2.17484
chr7:27943676-27951821	Egln2	1.97359	2.2398	2.35876	2.22282	1.91178	2.67154	2.19652	2.12748	2.4108	2.2382	2.1432	2.21728	2.22418	1.94572	2.19095	2.07953	2.16884	2.15388	2.1121	2.11284	2.25181	2.13457	2.09751	2.19863	2.01806	2.20272	2.11127	2.17461
chr7:27620357-27628283	Cyp2a5	2.07476	2.26595	2.20029	2.17636	2.23719	2.10876	2.27573	2.13314	2.07091	2.19181	2.10744	2.2388	2.02445	2.16244	2.19032	2.66192	2.04809	2.2489	2.06348	2.26751	2.24082	2.10218	2.15124	2.02684	1.98862	2.25331	2.16735	2.17328
chr7:111728137-111729183	Olfr653	1.93358	2.12411	2.2116	2.09436	2.03795	2.05295	2.12316	2.06035	2.24257	2.08581	2.0579	2.30915	2.05468	2.17825	2.01973	2.40034	1.76613	1.9939	2.38475	3.16467	2.26233	2.3969	2.12033	1.95649	2.29302	2.0979	2.25492	2.17325
chr2:85193151-85194081	Olfr988	2.25944	2.52197	1.16432	1.37657	2.14051	2.04667	1.89013	2.15843	2.4225	2.27709	1.99359	2.42007	2.36211	2.19351	2.50711	2.29227	1.53105	2.28136	2.24976	2.48128	2.28497	1.94505	2.47313	2.60175	1.96999	2.60807	2.21898	2.17303
chr2:26523193-26526802	Lcn4	2.20141	2.10827	2.15744	2.25572	1.91214	2.04025	2.21305	2.03683	2.19169	2.29865	2.17268	2.07183	2.14997	2.24412	2.18876	2.31367	2.14718	2.2066	2.0754	2.26755	2.13457	2.11518	2.04045	2.18736	2.20349	2.42229	2.27947	2.1717
chr13:67768377-67784449	Zfp738	2.16682	2.18225	2.18756	2.10595	1.21699	2.13221	2.19681	2.14006	2.21775	2.03952	2.06358	2.13608	1.97439	2.22504	2.16093	2.22786	2.14043	3.06431	3.04486	2.1208	2.22271	2.1588	2.18518	2.14109	2.033	2.07665	2.03186	2.17013
chr13:50562675-50570724	Gm806	2.09191	2.07575	2.07284	2.09067	2.18523	1.88583	2.08161	2.20431	2.12881	2.14793	2.1536	3.41335	2.06225	2.15702	2.0804	2.0763	2.02281	2.05991	2.2028	2.25491	2.11107	2.09117	2.16971	2.0415	2.15	2.36652	2.19666	2.16944
chr12:89414032-89420338	Gm10436	2.01063	1.41194	2.22172	2.87021	0.371705	3.53349	1.13965	1.5669	3.10681	3.32394	1.65589	4.19616	2.02388	2.63097	1.50541	2.77295	2.04919	2.06897	1.76691	1.98615	1.9619	1.62015	1.9886	2.4074	2.02684	2.1658	2.16416	2.16846
chr17:19499098-19531554	Vmn2r99	2.08154	2.06748	2.05641	2.01537	2.91117	2.82627	2.02891	2.92161	1.96347	1.08386	2.19203	2.19626	2.09062	2.31383	2.15028	2.14377	2.04746	2.03432	2.96322	2.01618	2.06596	2.05499	2.05799	2.08131	1.9868	2.07831	2.11716	2.16839
chr11:49257354-49258290	Olfr1388	1.93727	2.17649	2.2178	2.03514	2.39624	1.79372	2.24931	2.35725	1.99362	2.42321	2.40106	2.41773	2.14246	2.24771	2.08375	2.6439	2.18719	1.70691	2.42471	2.13407	2.09701	2.21049	2.24826	1.66818	2.4727	2.10746	1.75735	2.16781
chr16:19285886-19286834	Olfr164	2.46722	1.89096	2.35751	2.09087	2.09447	2.09414	2.194	2.11731	1.77481	2.02053	2.08701	2.03861	1.92925	2.36842	1.77811	2.51169	2.31253	1.92457	2.55036	1.77993	2.22657	2.27616	2.46364	2.32753	2.27858	2.11737	2.41526	2.1662
chr15:82282806-82287257	Cyp2d9	2.25825	2.14177	2.07384	2.23257	2.3971	1.93224	2.10812	2.1416	2.1356	2.16281	2.09566	2.01748	2.20014	2.23058	2.08571	2.25147	2.17385	2.13659	2.11815	2.0665	2.11211	2.05423	2.08812	2.10775	2.53097	2.24414	2.38912	2.16617
chr15:63689279-63710113	Gsdmc3	1.25038	1.95208	1.67525	1.96034	2.01538	1.97583	2.83485	3.70396	2.79044	1.71688	2.00281	2.71578	2.77608	3.01158	1.27705	1.23969	1.56373	1.6517	1.10394	1.97289	3.43	1.54477	2.62502	1.99824	2.60079	2.56658	2.52153	2.16584
chr2:150083252-150096036	Gm14124	2.37334	1.9736	1.83667	1.93235	1.92402	1.63098	1.58788	1.88103	2.22963	2.14	2.25972	2.27307	2.1868	2.53352	2.15509	2.30392	2.3329	2.26935	2.07111	2.28115	2.24349	2.30274	2.28108	2.30938	2.41101	2.42642	2.3211	2.16561
chr7:147336526-147340558	Sprn	2.15944	2.30126	2.18713	2.0747	2.22336	2.15089	2.21465	2.18298	2.057	1.99963	2.21699	2.24741	2.17688	2.01741	2.10488	3.11292	2.20401	1.99216	2.06392	2.1752	2.22026	2.21905	2.14318	2.14944	1.94528	1.92407	1.98159	2.16466
chr2:88064236-88065187	Olfr1170	2.06577	1.78599	1.95015	1.75347	2.06465	1.95112	1.94645	2.35406	2.93698	2.11742	0.930381	2.28016	0.87191	3.04641	2.04395	1.91951	2.13251	3.00726	2.19936	1.98097	3.2122	2.62149	2.14139	1.99559	2.44707	2.2719	2.3692	2.16286
chr3:107766613-107772092	Gstm3	2.06961	1.96816	2.06183	2.1444	2.1968	2.17031	2.16177	2.12489	2.23917	2.11568	2.13136	1.99687	2.09584	2.19009	2.28266	3.23068	2.03936	2.02791	2.10883	2.14865	2.09114	2.12076	2.18558	2.07611	2.1845	2.11277	2.11489	2.16262
chr13:61260575-61265549	Ctsr	2.07977	3.0322	3.13203	2.12243	2.0218	1.85317	2.105	3.07595	1.95467	1.9825	2.06767	2.1055	2.03418	2.04672	2.09147	2.15615	2.11837	2.02939	2.07663	1.9385	2.15724	2.00274	1.96684	1.93036	2.18373	2.0715	2.02227	2.16144
chr1:90303593-90323013	Spp2	2.12627	2.06889	2.12774	2.13131	2.08955	2.01166	2.12971	2.09144	2.15733	2.14664	2.02677	2.06693	2.03946	2.0714	2.10524	1.97851	1.97101	1.99504	2.10583	2.17714	4.21283	2.06112	2.07178	2.05353	2.07239	2.10395	2.1561	2.1611
chr7:147387710-147388667	Olfr524	2.09935	2.21589	2.11958	2.02434	2.37778	1.79597	1.94291	1.91113	1.9604	2.26894	2.08683	2.52566	2.09626	2.33158	1.77103	3.39209	2.0697	2.15813	2.01973	1.97447	1.79188	2.07161	2.08049	2.213	2.31785	2.33341	2.39848	2.16106
chr10:128611106-128612110	Olfr772	2.35622	2.2122	1.86399	2.61653	2.48488	1.86573	2.65056	1.69168	1.75009	2.3688	2.3429	1.5995	1.90235	1.41687	1.70857	1.98772	1.95216	2.21287	2.77254	2.3033	2.19529	2.29308	2.6186	2.0659	2.21723	2.66382	2.23182	2.16093
chr1:176047221-176048145	Olfr231	2.00955	2.20878	2.13119	2.21385	1.76167	2.27727	2.12565	2.2311	2.2624	2.11732	2.27788	2.41351	2.01713	2.27704	1.73145	2.43681	2.37695	1.99742	2.23752	2.18317	2.40903	2.27847	2.21198	2.43417	1.7763	2.05767	1.86818	2.16013
chr15:74875902-74879093	Ly6c1	2.2732	2.21735	2.28642	2.28016	2.27071	2.21366	2.39101	2.33466	2.18818	2.22965	1.73066	2.31508	2.1242	1.85972	1.56542	1.6689	2.27937	2.43663	2.33449	2.10374	2.33234	2.10218	2.15189	1.85333	2.31221	2.25687	2.19049	2.15935
chr1:176321176-176322186	Olfr248	1.99955	2.09813	2.17928	2.20106	2.12222	1.71297	2.0744	1.99815	2.11619	2.23922	2.02227	2.40655	2.56046	2.455	1.98311	2.36933	2.4697	2.08891	2.52174	2.50336	2.02211	2.29887	2.6654	2.09744	1.6177	1.72322	1.7391	2.15872
chr2:90240796-90241831	Olfr1274-ps	2.53166	2.06796	2.27993	2.09225	1.67421	1.80699	1.94838	1.85254	0.935139	2.27434	2.21083	1.08182	2.06924	1.90097	2.50368	2.08781	1.53253	3.6386	2.06748	2.09856	2.82537	3.00092	1.71438	4.1568	1.97475	2.11653	1.82023	2.15792
chr15:76875705-76887538	Apol6	2.11413	2.02121	1.98951	2.0186	2.01448	2.04777	2.08665	1.95724	2.87597	4.01126	1.95225	1.87863	1.877	2.21591	2.15601	2.95932	2.02189	2.07985	1.94407	1.95838	1.97186	1.93894	2.08774	2.08867	2.04956	1.92021	1.97978	2.15618
chr7:110990151-110991676	Hbb-bh1	2.2879	2.23225	2.07369	2.10206	2.24772	1.80274	2.0782	2.26923	2.15422	2.3554	2.10953	2.79138	2.66829	2.06849	1.84372	2.35241	2.45787	2.28897	2.05113	2.37611	2.32057	2.40327	2.20242	1.96602	1.30565	1.60508	1.7849	2.15553
chr7:5562012-5562915	Vmn1r61	2.16392	2.2247	2.31507	2.19436	2.43169	2.33132	1.75663	2.19182	1.99215	1.85159	2.246	2.37611	2.27146	2.48931	2.25763	1.93944	2.19366	2.03986	2.03135	2.13464	2.42974	1.94241	2.33598	1.79814	1.7666	2.2879	2.18988	2.15494
chr9:38137076-38138144	Olfr25	2.27063	1.81589	1.94832	2.1663	1.96418	2.06959	2.17798	2.05946	2.07727	2.15987	2.1181	2.45874	2.13784	2.02596	2.0572	2.04936	2.40964	1.85876	2.10023	3.55428	2.12234	2.12082	2.25016	2.1547	2.14642	1.84623	2.05671	2.1547
chr17:19190456-19218275	Vmn2r98	2.0409	2.08904	2.01629	2.06554	2.97846	2.83108	2.05605	2.98414	2.05987	1.06342	2.17974	2.11651	2.00463	2.19341	2.05853	2.02839	2.06187	1.97929	3.024	1.99888	2.00475	1.86865	2.06064	2.0623	2.10039	2.11048	2.11533	2.1538
chr3:64192542-64213979	Vmn2r4	2.02841	2.13027	2.1267	2.16769	2.07257	2.05109	2.01057	2.11669	2.04546	3.22697	2.18461	2.22521	2.10296	2.32497	2.24113	2.14376	2.09561	2.04046	2.12655	2.01217	2.15864	2.0579	2.10468	2.05088	2.09519	2.11785	2.08534	2.15349
chr7:12737812-12738754	Vmn1r78	2.49111	1.95192	2.1268	2.23605	2.09789	1.87939	2.39652	1.93517	2.17508	2.10166	2.18583	2.56193	2.31051	2.53729	1.26676	2.19039	2.13523	2.31383	2.23969	2.06927	2.19844	2.06867	2.11696	2.31148	1.98714	1.76792	2.47604	2.15292
chr2:85815369-85816430	Olfr1029	2.39904	1.97756	2.10132	1.91072	2.26297	2.26148	2.2104	2.22519	2.28297	2.10023	2.30366	2.342	2.48068	2.92954	1.65715	2.06698	1.73263	2.51466	2.04578	1.9118	2.07783	1.8747	1.98873	1.84595	2.00995	2.02429	2.57339	2.15228
chr19:12372672-12373620	Olfr1436	2.08613	1.65719	1.99569	2.38059	2.35267	2.28215	2.08446	2.5052	2.07608	3.06838	2.05567	1.91889	1.98137	2.09902	1.61291	2.00047	1.99433	2.25909	2.4692	2.21761	2.32611	2.09677	2.32332	2.3244	1.86241	2.11911	1.95453	2.15199
chr7:34528817-34530122	Scgb1b24	2.27426	2.17162	2.32937	2.04238	1.8617	1.76662	2.14691	2.52518	2.29333	2.06582	2.24164	2.40889	2.12017	2.22276	2.12165	2.01316	2.2814	1.06422	2.13937	2.12251	2.22657	1.84877	2.30341	2.2624	2.47438	2.45184	2.32333	2.15199
chr4:60432031-60434824	Mup9	2.12304	1.99074	1.61778	1.89745	2.28938	2.25631	1.51707	2.74636	1.32153	1.53897	1.02039	1.54801	0.875774	0.932343	0.869729	1.26301	2.63919	4.30385	4.89631	0.954486	2.97172	2.06995	4.90869	2.01515	2.61093	2.29916	2.62522	2.15195
chr7:34796950-34798961	Scgb2b27	2.10792	2.07168	1.99151	2.08442	2.14725	1.81671	2.33304	2.37899	2.18431	1.93475	2.21462	2.33678	2.15153	2.49402	2.15234	2.37346	2.3308	1.27743	2.27358	2.00277	2.06814	2.32008	2.21155	1.94798	2.53904	2.39693	1.93459	2.15097
chr4:62170203-62181097	Alad	2.03663	2.10583	2.077	2.13123	1.95666	2.20359	2.151	2.07336	2.1291	1.97172	2.0486	2.05913	2.09177	1.90811	2.17861	1.96056	2.11377	2.08196	2.01345	2.14565	4.22893	2.04624	2.14778	2.0877	2.04354	1.93925	2.11206	2.14975
chr14:15007643-15008594	Olfr720	2.34265	2.32241	2.17034	1.99216	1.85339	1.92421	2.14556	2.20479	2.01281	2.07003	2.44086	2.1096	2.34498	2.11237	2.03405	2.11101	2.07621	2.25923	1.87784	2.39875	2.27618	2.0979	2.34773	2.20343	2.54247	2.13546	1.63475	2.14967
chr7:27542205-27557649	Cyp2b19	2.07314	2.08759	2.06937	2.02803	2.12977	2.15374	2.16489	2.12708	2.13609	2.08482	2.16875	2.14217	2.09758	2.13788	2.11218	3.01347	2.17892	2.11845	2.17451	2.0644	2.09553	2.05134	2.08111	2.13385	2.07238	2.20836	2.12656	2.14933
chr7:25507512-25509309	Gm4763	2.07625	2.10578	2.07792	2.12001	2.01821	1.94427	2.23983	2.20224	2.10803	1.96408	2.09825	2.20944	2.04678	2.32988	1.95136	2.03712	2.05633	2.32451	2.13149	2.2511	2.24851	2.04983	2.26153	2.13833	2.19911	2.12879	2.70595	2.14907
chr19:13239505-13240444	Olfr1461	2.07275	2.42185	2.08539	2.32874	2.3284	2.19464	1.93199	2.06279	2.32002	1.96609	2.20922	2.26229	2.10488	2.20637	1.90122	1.14635	2.0043	2.67031	2.20499	2.28013	2.03538	2.16154	2.091	2.08128	2.58274	2.40127	1.96378	2.14888
chr8:19495096-19497775	Defb7	1.93383	2.03018	1.72433	2.1326	2.24581	2.10235	2.14243	1.8794	2.03463	2.08552	1.80371	2.04511	2.11311	2.30033	2.04741	1.93561	2.1255	1.99152	2.28005	2.0265	1.92041	4.09235	1.90682	2.82065	2.12261	2.01581	2.11684	2.14724
chr7:26301060-26325023	Ceacam2	2.06306	2.02403	2.11761	2.88735	2.20418	1.90063	2.03672	2.45497	2.09069	2.20396	2.19547	1.99627	2.21611	2.30203	2.52014	2.23969	2.1046	2.13428	1.8889	2.11195	1.30324	2.39358	2.34643	2.04132	2.07867	2.02605	2.0886	2.14706
chr17:36084098-36090262	Gm8801	1.97957	2.12309	2.03659	2.02526	2.14283	2.19969	1.97784	3.19611	2.10164	2.24027	2.10766	1.98294	1.92715	2.41125	2.22625	1.93846	1.89268	3.09695	2.09008	2.01244	2.79529	1.91403	1.8571	1.95762	1.77892	2.00285	1.93876	2.14642
chr19:39361574-39405203	Cyp2c29	2.03834	2.03962	2.01527	2.04736	2.1079	1.99631	2.07411	2.04579	1.88204	2.02035	2.13406	2.12213	3.1533	2.2348	2.07393	3.20742	2.08104	2.04046	2.03788	2.03203	2.09409	2.01186	2.08057	2.05825	2.04459	2.14741	2.12904	2.14629
chr17:34161927-34162037	Mir219-1	2.4189	2.32169	2.34956	2.05807	1.94491	2.63987	2.58325	2.24517	2.20508	1.21371	2.68715	1.63619	2.30546	0.930662	2.3092	1.85436	2.54073	1.31546	1.6388	2.96393	2.60345	2.26693	2.31403	2.08014	1.66023	2.4156	2.43222	2.14573
chr13:33241143-33251623	Serpinb9c	2.18907	2.16815	2.08779	2.21487	2.15919	2.15227	2.14263	2.18199	2.15446	2.06692	2.09607	2.20385	2.12766	2.14066	1.95616	2.04381	2.18937	2.31808	2.17116	2.10371	2.21755	2.23047	2.07436	2.14683	2.10673	2.0894	2.19995	2.14567
chr16:59035605-59039575	Olfr187	2.13558	1.8937	2.02181	2.11015	2.11713	2.03709	2.1334	2.09422	2.19749	1.88572	2.19643	2.31413	3.31002	2.11178	2.0988	2.1216	1.92647	1.97742	2.02729	2.16088	2.05502	2.17331	2.08163	2.19032	2.2777	2.13885	2.14089	2.14551
chr17:40769023-40774009	Esp3	2.28678	2.20152	2.01741	2.23463	1.9982	1.87	2.19593	2.0457	2.13586	2.12449	2.18469	2.13181	2.14466	2.22366	2.13045	2.08069	2.14966	2.08789	2.04225	2.24638	2.15265	2.2091	2.25814	2.03909	2.13461	2.23646	2.35928	2.14526
chr14:41985500-41998487	Sftpd	2.06698	2.18422	2.08606	2.15897	2.15908	1.9357	2.18308	2.09501	2.07158	2.12906	2.04113	2.20636	1.97754	2.21556	2.03932	2.06996	2.11781	2.20671	2.17004	2.12354	3.13657	2.10787	2.2225	2.00871	2.15673	1.99958	2.04789	2.14509
chr7:110888714-110889836	Olfr629	2.29678	2.0069	2.17259	1.96062	2.23983	1.93142	2.09723	2.31016	1.75076	2.40212	2.06372	2.13575	2.07151	1.9123	2.1569	1.9248	2.20023	2.29327	2.41126	2.39289	2.31932	1.99553	2.34928	1.96781	2.26935	2.08067	2.19624	2.14479
chr6:58215167-58216076	Vmn1r28	2.16961	2.24445	2.20001	1.93418	2.18386	2.17182	2.17214	2.26907	2.04208	2.25485	2.00652	2.16279	2.05535	2.414	2.26355	2.39225	2.0801	2.10917	1.86704	1.94652	2.15321	1.98915	2.20791	2.32546	1.67756	2.17966	2.4125	2.14388
chr17:36166921-36169646	H2-T23	2.27584	1.85979	1.94492	1.94852	1.87811	1.91624	2.30518	1.65396	3.05162	1.52245	2.626	2.45249	2.10422	2.73919	2.82923	2.01049	2.28764	2.02827	2.26122	2.46782	2.17698	2.62023	2.28816	2.51257	1.19762	1.51264	1.39878	2.14334
chr17:34162977-34165000	H2-Ke6	2.04156	2.254	2.04365	2.03421	1.77346	2.42275	2.14727	2.13604	2.29408	2.02876	2.50365	2.22634	2.24029	1.81121	2.66034	2.25291	2.1687	2.31066	2.16833	2.06628	2.12253	2.26184	1.95035	2.04253	1.89825	1.75172	2.2532	2.14314
chr17:8231374-8294093	Gm1604b	1.74126	1.80251	2.06482	1.54156	2.03772	1.32709	2.21741	1.40805	2.28313	1.84527	2.13543	2.05326	2.07971	3.00674	2.06534	2.65917	2.99847	2.3262	1.69713	3.25244	1.78834	1.52023	2.73424	2.373	2.81635	2.04387	2.04234	2.143
chr13:50340549-50345677	Gm906	2.07628	1.80627	1.92666	1.6664	2.03559	1.70455	1.84512	2.28575	1.92122	2.33007	2.72087	2.73264	2.74645	2.55026	2.97029	2.5576	2.16162	2.22964	2.24554	1.79002	1.27251	2.15098	2.24653	1.56132	1.8824	2.30037	2.14342	2.14298
chr15:74874447-74879267	Ly6c1	2.31231	2.24259	2.23953	2.352	2.20157	2.24591	2.32077	2.21443	2.23192	2.23368	1.76907	2.19592	2.13301	1.88228	1.60666	1.84367	2.12896	2.44539	2.11985	1.94817	2.18748	2.09802	2.11441	1.91046	2.28503	2.28036	2.20807	2.13895
chr15:74875902-74879267	Ly6c1	2.21811	2.15137	2.24695	2.29764	2.28686	2.19788	2.36819	2.29261	2.16689	2.23897	1.77427	2.28298	2.10656	1.81259	1.57511	1.69052	2.20395	2.40339	2.28272	2.08583	2.32521	2.09404	2.13532	1.81269	2.25738	2.26486	2.17631	2.13886
chr8:107899280-107906762	Plekhg4	2.15319	2.05374	2.05308	2.20248	1.94762	2.12007	2.12789	1.96406	2.04606	2.08673	1.9846	2.11797	3.27797	2.28289	2.1913	2.11216	1.95547	2.18202	2.20406	2.07728	2.25791	2.09262	2.15568	2.03654	2.0468	2.08368	1.91478	2.1381
chr7:114988300-114989245	Olfr470	1.84141	1.65067	1.48733	2.72537	1.14389	1.89073	1.83983	0.0503147	3.66934	2.2576	2.49874	3.314	1.98238	5.4071	2.24469	1.40661	2.55087	2.35242	1.56732	1.31438	2.29442	2.77345	2.01743	1.67767	1.57016	2.25853	1.92953	2.13764
chr13:33096409-33109824	Serpinb9	2.07661	2.08887	2.06976	2.12064	2.05507	2.16792	2.04956	2.12115	2.16344	1.97793	2.07345	2.02344	2.18636	2.06119	1.98868	2.03705	2.06223	2.04902	2.07718	3.09102	2.0775	2.17673	2.25516	2.09951	2.18836	2.11725	2.24244	2.13695
chr1:31321691-31324906	Gm4850	2.2234	1.82838	2.8924	0.218893	1.52642	0.270276	1.54688	0.257044	1.3538	3.97245	6.18324	2.21806	2.00875	2.76267	6.4277	1.47188	1.0444	1.65698	2.95614	2.0874	0.279989	2.06677	2.95221	0.546306	2.36827	2.33577	2.23922	2.13688
chr13:47107925-47110219	Nhlrc1	2.1604	1.97672	2.28397	2.00282	2.03624	2.25158	1.9751	2.03581	2.09606	1.98406	1.99335	1.96636	2.22853	2.18186	2.48235	1.7967	3.23929	2.18387	2.19684	2.14527	1.90003	2.07359	2.03705	2.27137	1.96985	1.9636	2.24596	2.13625
chr7:12845107-12846028	Vmn1r81	2.09611	2.20316	1.85164	2.52738	2.08588	2.34668	2.12422	2.24544	0.982303	2.28413	2.15594	2.34711	1.93052	2.25148	2.39368	1.85227	2.05272	2.12836	2.16945	2.00255	2.33912	2.34729	2.53655	2.01396	2.18527	2.03977	2.16966	2.13565
chr4:118382013-118382952	Olfr1341	2.23996	2.08471	1.95897	2.2077	1.70627	1.83896	2.23505	1.12937	2.36328	2.27118	2.16897	2.07301	1.83724	2.52786	2.51924	2.65842	2.19345	1.91463	2.2798	2.11493	2.28517	1.8901	2.08203	2.22221	2.16162	2.37015	2.32327	2.13546
chr13:33241143-33250220	Serpinb9c	2.18167	2.17546	2.09149	2.19276	2.12867	2.16504	2.14278	2.17159	2.11737	2.06804	2.08013	2.20162	2.14844	2.10783	1.93648	2.08621	2.18477	2.32473	2.13504	2.05818	2.18412	2.23916	2.03967	2.17826	2.13466	1.9801	2.19938	2.13532
chr10:129338831-129339782	Olfr815	2.10436	2.2053	2.19386	2.12037	1.94933	1.98092	1.79055	2.27622	1.40396	2.29976	1.59278	1.24628	2.04747	2.60345	2.54588	2.67833	1.85073	2.43634	2.58083	2.27572	2.44519	1.84215	2.30934	2.47202	2.3675	2.51917	1.50237	2.13482
chr9:109280922-109306808	Fbxw22	2.05343	2.05164	2.08116	2.10784	2.23769	1.99642	2.13259	2.10028	2.0928	2.28631	2.11914	2.01429	2.19539	2.64493	2.24032	2.10254	2.0729	2.06806	2.12485	2.11482	2.06177	2.08518	2.08279	2.14084	2.10511	2.14687	2.16971	2.13443
chr17:17258346-17283842	Zfp97	2.92062	2.79391	2.19023	2.28469	2.68183	2.01531	2.69522	1.34789	3.45732	1.79387	1.33377	1.75153	2.0726	4.05957	1.86036	1.70159	1.6168	2.49704	2.50554	3.70022	0.862086	2.51039	0.911361	2.58277	0.940786	1.67217	0.869241	2.1344
chr19:33629770-33664801	Lipo1	2.87107	3.53522	2.7869	2.04165	2.83799	2.03391	2.90509	2.98676	1.89152	1.06042	1.94036	1.98091	1.93481	2.19455	2.03303	2.01261	1.83213	1.81931	1.91309	1.79136	1.84798	1.90027	1.90432	1.94074	1.89592	1.9264	1.80618	2.13424
chr2:85924886-85926011	Olfr1037	2.09184	2.07375	1.9459	2.26296	2.29216	2.12931	2.04021	2.1683	2.33995	2.25277	2.20662	2.60422	2.53764	2.01916	2.1174	1.32666	1.77169	2.05572	2.12546	2.15888	2.30661	2.36676	2.53512	2.11034	1.684	2.01263	2.06918	2.13353
chr19:36806220-36811094	Ppp1r3c	2.90665	2.04767	2.04812	2.20685	1.82486	2.44073	2.08602	2.04776	2.19118	1.92559	2.15154	2.01237	2.29964	1.8789	2.243	2.13183	2.2199	1.98877	2.12481	2.20894	2.11028	2.10672	2.02545	2.11526	1.98422	1.993	2.2499	2.13222
chr1:176088852-176089898	Olfr420	2.24636	1.92026	2.21968	2.03361	2.19592	2.17354	1.79008	2.68554	2.16171	2.02063	2.09229	2.09671	2.15139	2.07867	2.05234	1.88194	2.24991	2.18675	2.26745	1.82321	1.90787	2.21652	1.99061	2.14496	2.11615	2.26546	2.56593	2.13094
chr7:27450245-27471449	Cyp2b23	2.05692	2.06531	2.04135	2.06286	2.1935	1.97753	2.08464	2.0963	2.00314	2.17285	2.08492	2.077	2.13809	2.11143	2.09902	3.20542	2.08789	2.09236	2.08078	2.06452	2.09825	2.13894	2.10937	2.04782	2.03171	2.15239	2.12785	2.12971
chr15:79913288-79913336	Snord43	1.45768	2.52175	1.98381	1.91193	1.02662	2.40706	2.50699	2.62511	2.88671	2.76507	1.63071	2.1393	2.53975	2.11853	2.1744	2.08852	2.18729	2.6385	2.14508	2.61289	1.92675	2.4435	1.93639	2.66737	1.23996	1.49984	1.3938	2.12872
chr9:35656129-35657465	Gm3428	2.32115	1.9868	1.93067	1.84331	3.07403	1.92983	2.87653	2.00012	1.78793	1.86079	2.17066	2.02371	1.92188	2.07314	1.78195	1.88653	2.88434	3.06836	2.1161	2.11308	1.6041	2.01722	1.66031	1.87324	2.31943	2.21177	2.12116	2.12808
chr2:90105667-90106585	Olfr1271	2.23308	2.07522	1.95155	1.83087	1.99951	2.0017	2.01001	1.95889	2.03367	3.23258	2.06941	2.10519	1.88399	2.46185	1.92148	2.26769	2.19303	2.19002	2.06453	2.14896	2.3174	2.03	2.13613	2.08793	1.9577	2.16967	2.11585	2.1277
chr9:88736635-88753639	9330159M07Rik	1.93988	2.01331	2.02255	1.95227	1.99496	2.34976	1.94395	2.01604	2.75923	3.29612	2.49042	2.17922	1.83252	3.70838	2.05147	2.64456	1.7813	2.00345	0.594638	1.89422	2.23742	1.86622	1.93668	1.83983	1.97976	1.9701	2.1229	2.12671
chr9:38951686-38952603	Olfr242	1.99726	2.13448	2.42497	2.31153	2.24784	2.38931	2.00624	2.13284	2.1902	2.94888	2.34342	1.95261	2.24602	2.76795	2.01108	3.1581	1.58695	2.2384	1.21594	1.77716	2.24628	2.4446	2.52654	0.366878	1.78058	1.61451	2.33487	2.12576
chr9:88736635-88753708	9330159M07Rik	1.94513	2.01033	2.01943	1.9486	1.9896	2.35322	1.9449	2.01358	2.76242	3.29003	2.48867	2.1757	1.83289	3.70059	2.05086	2.64519	1.77662	2.00115	0.59432	1.89219	2.23628	1.86204	1.93094	1.83753	1.98061	1.96875	2.12102	2.12491
chr16:36404031-36408449	Stfa2	2.18026	1.60388	1.85106	1.65376	1.48475	2.42202	2.56167	0.611241	2.61004	2.1266	2.17822	2.27377	2.43987	2.13568	1.81834	2.24552	2.15293	2.63387	2.85323	2.27151	2.54325	2.01502	2.676	2.26768	2.03279	2.03893	1.67229	2.12423
chr2:122466538-122466617	Mir147	2.22791	2.34354	2.23055	1.92627	1.9596	2.64317	2.47768	1.57419	2.04986	1.96783	2.38668	2.51689	1.91574	1.81016	2.07463	2.47692	2.53786	2.51652	1.80251	1.68936	2.00945	1.61121	1.92052	2.28726	2.48885	2.33962	1.56465	2.12405
chr10:128426969-128427908	Olfr9	2.25598	2.53891	1.98207	1.8858	1.96445	2.03317	2.15471	2.0643	3.14855	1.28139	1.83172	2.0864	2.02437	2.91568	2.4968	1.42671	1.81262	2.19685	2.12903	1.82639	1.96169	2.39017	2.05318	2.2346	2.577	1.96934	2.0824	2.12312
chr4:126921027-126925053	BC003266	2.00612	2.1245	2.0459	1.9501	1.93254	2.58607	2.14367	2.0991	2.40186	1.91306	2.06395	1.90274	2.11254	1.94414	2.05177	1.98068	3.09066	2.2278	2.17137	2.02603	2.1915	2.19427	2.10168	2.00683	1.94034	2.04832	2.06094	2.12291
chr7:18931156-18940356	Psg18	2.07328	2.07135	2.04457	1.93342	2.07239	1.74247	2.21236	2.10377	2.1371	2.14069	2.17667	2.32793	2.10751	2.43525	2.09884	2.07183	2.00114	1.93068	2.29304	2.06128	2.10184	2.10312	2.14967	2.09195	2.14172	2.34912	2.33939	2.12268
chr4:143747458-143752554	Oog3	2.00939	2.11893	2.0859	2.03318	1.98403	1.84474	1.92463	2.15905	1.95612	2.21098	2.2354	2.24728	2.07415	2.21503	3.29396	2.17531	1.97192	2.053	2.04055	2.15856	2.04563	2.14868	2.04615	2.14077	1.89216	2.08916	2.10943	2.12089
chr15:100183630-100192250	Mettl7a2	2.89934	2.02523	2.72061	2.72356	1.52628	2.13632	1.43018	2.00244	2.0293	2.75843	2.52427	2.58409	2.63838	2.24399	2.17494	1.98151	1.85608	2.91769	1.86904	1.47294	2.76956	0.0201603	1.89289	1.88641	2.11009	1.95544	2.05122	2.11853
chr2:88937094-88938120	Olfr1220	3.29843	2.14361	2.13809	2.066	2.28371	1.8934	2.11855	2.0492	1.81767	2.1659	2.26543	2.28463	1.90646	2.35534	2.0343	1.91858	2.30305	1.79616	1.83184	2.27239	1.94431	2.20545	1.87019	2.22974	2.14197	1.91707	1.9466	2.11845
chr7:114240980-114241928	Olfr17	2.11513	2.047	2.09078	1.06161	2.54628	0.838534	1.22914	2.07956	2.08498	2.39956	2.43979	2.3239	2.13158	2.46205	2.31228	1.8623	2.46934	2.3284	2.21479	2.43794	2.19312	1.91208	2.27473	2.02552	2.27325	2.23433	2.80022	2.11808
chr4:61744510-61748346	Mup3	2.10336	1.94185	2.29993	2.08562	2.20476	2.30458	2.27213	2.03684	1.99795	2.16356	2.03254	2.19661	1.94921	2.3825	2.26845	2.12832	2.14119	1.94323	2.15684	2.10991	2.10101	2.02446	1.92584	2.0501	2.13221	2.29976	1.93067	2.1179
chr13:61348107-61356709	Cts8	1.99494	2.02353	2.08027	2.00323	2.01057	1.94811	2.01278	2.04321	2.00754	2.0518	2.16433	2.05428	2.04384	3.2215	2.02247	2.07745	2.19799	2.07486	2.23218	2.11214	2.14272	2.01977	2.05364	2.13871	2.2571	2.03776	2.15036	2.11767
chr7:39005672-39013013	Plekhf1	1.87857	1.88299	1.89412	1.85353	1.72747	2.09707	1.79589	1.9573	2.03984	1.91379	1.96202	1.9045	1.88871	1.69051	1.99008	1.93785	2.89808	3.02116	1.8747	3.81007	1.9768	2.04625	2.96375	2.99183	1.77272	1.68251	1.70236	2.11683
chr1:175999430-176000384	Olfr430	2.32136	2.50537	2.03122	1.68433	1.98365	2.09302	2.08525	2.32017	2.14247	1.99441	2.17487	2.21504	2.33012	2.50998	2.0502	2.03225	2.07723	1.81305	1.92705	2.03315	2.00993	1.97548	2.288	2.36392	2.00043	2.03893	2.15262	2.1168
chr7:115098156-115099089	Olfr474	1.95287	2.06034	1.08154	2.06673	2.21393	2.46088	1.95287	2.13166	2.08502	1.9562	2.21002	2.01579	2.04264	2.25002	2.19696	1.86103	2.17613	2.21515	1.7503	2.21148	2.34424	2.18055	2.30319	2.40445	2.45214	2.03153	2.52545	2.11604
chr7:21947203-21948127	Vmn1r123	1.70387	2.47308	1.49221	1.89074	3.17341	1.79061	1.90936	1.19153	0.851067	2.82436	3.0118	1.61838	2.54246	2.23993	2.83613	1.29653	3.01639	2.08951	2.40781	1.40673	2.71886	3.46814	4.78854	2.13447	0.092103	2.10142	0.0634552	2.11603
chr4:61492352-61496214	Mup5	2.04845	1.91965	2.00346	1.90557	2.01925	1.88768	2.15692	4.1326	1.9709	2.04541	2.11571	2.11682	1.99758	0.946216	2.01195	2.0814	2.14564	2.04843	2.25532	1.98041	3.00921	2.05747	2.22024	2.03546	2.04029	1.87998	2.09296	2.11574
chr2:89322345-89323290	Olfr1241	2.10987	1.81329	2.22106	2.22334	2.15106	1.9152	2.34041	2.16133	2.67122	1.89146	1.1315	2.00916	2.07672	2.38057	2.26718	1.98921	2.03226	2.30473	2.04728	2.02257	2.28421	1.88094	1.88128	2.66751	2.17105	2.48542	1.9844	2.11534
chr6:133242233-133245808	5530400C23Rik	2.12487	3.65264	1.94004	2.081	2.00694	1.97957	2.28913	1.90659	1.66048	1.06585	2.41533	1.69656	2.22107	2.30776	2.26269	1.68982	2.00464	2.78461	1.98048	1.8122	1.77112	3.11403	2.05669	1.89059	2.21012	2.0743	2.09859	2.11473
chr10:129855316-129866668	Vmn2r85	2.05923	2.05405	2.06345	2.08924	2.25819	2.04751	2.0291	2.09876	2.06261	2.17049	2.2777	2.54152	2.11558	2.43756	2.33466	1.99214	1.98874	1.9282	1.99257	1.97018	1.99113	2.04757	2.08068	2.06194	2.18851	2.07234	2.13082	2.11424
chr4:88058833-88084830	Ptplad2	3.08955	2.04715	2.03495	3.13486	2.0621	2.05494	2.02664	2.03893	2.05672	1.99427	2.12558	2.04211	2.00882	1.96003	1.98452	2.02169	2.08111	1.9982	2.04845	2.03291	2.05622	2.052	1.99528	2.03561	1.9852	2.04802	2.05773	2.11384
chr2:89257650-89258568	Olfr1239	2.11854	2.09864	2.10681	2.31626	1.91061	2.40031	2.36763	2.21219	2.02057	1.81233	1.9101	1.88509	2.5639	1.76199	2.30269	1.79799	1.84118	2.38696	2.01302	1.95529	1.9053	1.91663	2.18561	2.07946	2.12133	2.94547	2.13057	2.11357
chr3:159502658-159598139	Wls	2.04669	2.09951	2.10038	2.13749	2.15621	2.25136	2.10422	2.15696	2.10888	2.00269	2.33182	2.65828	2.03703	1.9427	2.06206	2.08729	2.07456	2.09068	2.04059	2.08314	2.0679	2.0496	2.068	2.03971	2.21383	2.03755	1.99606	2.11278
chr13:22974956-22976030	Vmn1r212	2.22194	2.08667	2.06176	2.02449	2.14354	1.87072	2.22752	1.8923	2.14637	2.35175	2.16469	2.23884	2.02611	2.51966	2.15704	1.86004	2.00908	2.14557	2.11838	1.97471	1.87779	2.99489	1.95091	2.15827	1.75269	1.59005	2.45303	2.11181
chr9:35492663-35494956	Gm17252	2.15747	2.27638	2.06789	2.18512	2.02153	1.91745	2.1076	2.19759	2.20387	2.07573	2.18334	2.22189	1.92628	2.04885	2.06098	2.14977	2.06045	2.0479	2.06597	2.09941	2.15604	2.13917	2.31166	2.14694	2.05777	2.05445	2.06857	2.11148
chr8:22437072-22438054	Defa5	2.832	2.29084	2.88215	2.38861	1.76338	3.14492	2.93806	2.63893	1.79552	2.79469	1.35256	2.24935	1.6582	3.1463	1.64356	1.31553	1.81973	2.35396	2.37235	3.08377	1.59924	2.25562	2.53608	1.25469	0.507189	0.934145	1.45861	2.11148
chr15:12749658-12754412	6030458C11Rik	1.96836	2.05974	2.33111	1.94749	1.913	2.31548	1.99652	1.87251	2.98711	1.97574	2.02681	2.97317	1.99475	2.79523	2.0761	1.9251	1.95457	1.93538	1.97912	2.08429	1.89936	1.91809	2.11761	1.95221	2.01871	1.89971	2.09215	2.11146
chr16:98168598-98183786	Zfp295	2.10483	2.20339	2.19401	2.10739	1.90569	2.27327	2.09909	2.21602	2.14326	1.98848	2.1554	2.40508	2.0749	1.88675	2.11679	2.10699	2.14525	2.20793	1.95523	2.14269	2.07305	2.06872	2.06375	2.10503	2.17251	1.99206	2.07586	2.1105
chr9:35477223-35480474	Pate2	2.03068	2.03944	2.03941	2.09429	2.02794	2.08474	2.20209	1.95788	2.09678	2.1902	2.28811	2.2304	2.16936	2.11586	1.99515	2.09625	2.14596	2.05323	2.14483	2.10971	2.18751	2.16242	2.22257	2.13187	2.04433	2.00111	2.092	2.10941
chr13:50513245-50529138	Fbxw17	2.04125	2.01376	2.09021	2.05959	1.99932	2.05374	2.03548	2.13506	2.03076	2.01425	2.02425	3.19259	2.07568	2.04161	1.99469	2.12274	2.06186	2.10562	2.15295	2.05393	2.07729	1.97771	2.06373	2.0229	2.16679	2.18181	2.16256	2.10934
chr14:15160626-15161580	Olfr31	2.24944	2.26429	1.99257	2.07909	2.07437	1.88903	2.27719	2.4531	1.67743	1.99399	1.94652	2.09791	1.9608	1.80496	2.26246	1.91763	2.21627	2.37829	2.20999	1.95965	1.93194	1.96319	2.2496	1.83387	2.14182	2.39917	2.72526	2.10925
chr7:34806585-34807900	Scgb1b27	2.08305	2.12095	2.28808	2.34963	2.30127	2.11779	2.24827	2.02861	2.04023	2.04066	1.93442	2.33098	2.15467	2.21923	2.00381	1.76167	2.46671	1.28591	2.1472	2.25183	1.8894	2.15421	2.14706	2.253	1.91935	2.04889	2.32438	2.10782
chr10:129470683-129471616	Olfr821	2.36975	2.10564	2.18453	2.15336	1.99644	1.78759	1.93696	2.3461	1.98322	2.19364	2.30394	2.31792	2.45145	2.13617	2.01655	2.31216	0	2.26398	2.39399	1.95089	2.14578	2.3979	2.04929	2.23593	2.35813	2.28017	2.23395	2.10761
chr2:36308106-36309045	Olfr340	2.16661	2.14961	1.98075	2.15216	2.16634	2.11776	2.00035	2.5705	2.12223	1.88182	2.25783	2.33839	1.86261	2.23207	2.03315	1.68654	1.83282	1.74099	1.96608	2.06573	1.90824	1.91566	2.11862	2.1613	2.74576	2.35656	2.35929	2.10703
chr17:6270474-6305783	Tmem181a	0.997244	1.35416	0.926867	1.45135	5.55853	3.9054	1.89717	4.98669	1.21308	1.42624	1.89398	1.71759	1.55229	1.10321	1.01319	0.961894	2.09958	1.8832	5.42152	3.10864	1.82124	1.57643	1.80233	1.9626	1.73877	1.75831	1.74992	2.10672
chr7:12761541-12762462	Vmn1r79	1.816	1.84201	1.68823	2.06516	1.86717	2.16394	1.99447	2.02398	1.20674	2.38887	1.83564	1.94293	2.31167	2.02404	2.08461	1.47083	2.58347	2.31462	2.29272	2.42434	2.04175	2.11598	1.95995	2.34427	2.59972	2.23525	3.23261	2.10633
chr15:63678863-63682497	Gsdmcl1	1.47825	2.58929	2.29924	2.14157	2.33342	2.04955	2.37373	2.3751	2.02074	2.4603	1.97344	2.0993	2.40344	2.36035	1.2193	1.56593	1.96033	1.35494	0.940367	2.37634	3.7296	1.54426	3.26216	1.83634	2.11873	1.9917	2.01207	2.10629
chr17:34165210-34168635	Slc39a7	2.0233	2.08366	2.36796	2.08525	1.80484	2.57206	1.91543	2.08583	2.45123	2.22901	1.88581	1.97134	2.03834	1.96252	2.46376	1.94026	2.30948	2.10642	2.24297	2.24099	2.0409	2.05595	2.08246	2.03329	1.83267	2.02112	2.01097	2.10585
chr1:94469701-94470783	Olfr1413	2.17556	1.83115	2.07355	2.18573	2.08947	2.07715	2.0952	2.42108	2.05837	2.07864	2.0799	2.17601	2.2249	2.63019	1.92109	2.15291	2.06831	1.91648	1.98435	2.05015	2.35195	1.92654	1.90448	1.94299	2.1248	2.08059	2.17316	2.10351
chr1:108974769-108980057	Serpinb3d	1.94258	2.11188	2.05347	1.89099	2.02566	2.04899	2.0083	2.18539	2.16571	1.94785	2.17062	2.19381	2.13292	2.30039	2.12353	2.0548	2.1408	2.10611	2.16732	2.12659	2.23481	2.12296	2.24749	2.04878	2.02794	1.97886	2.19594	2.10202
chr7:113949023-113949974	Olfr700	2.15541	2.14966	0.988338	2.3861	2.505	1.8536	2.10208	2.22125	2.13369	1.83021	2.27616	2.05655	1.91306	2.13995	2.08618	1.96048	2.27392	2.09672	2.04141	2.29633	2.29713	2.06673	2.1904	1.87199	2.17461	2.33667	2.33865	2.10157
chr7:111000267-111001721	Hbb-y	2.1905	2.15716	1.7372	1.90812	2.09197	2.27273	2.26223	2.04617	2.32374	2.05654	2.06318	2.31026	1.94275	2.30497	2.16315	2.04562	1.99422	2.2114	2.16672	1.76612	2.14496	2.52879	2.66973	2.16076	1.53362	1.84322	1.83685	2.10121
chr17:18288893-18322142	Vmn2r92	1.88402	2.22615	2.13449	2.0649	1.84792	1.57761	2.0581	1.60578	2.72822	2.23495	1.85359	2.32078	3.48549	3.16116	2.19859	2.21541	1.9238	1.59972	1.62381	2.10121	2.1743	1.55453	2.10274	1.86606	1.81383	2.67619	1.69268	2.10096
chr9:39807790-39808835	Olfr979	2.17457	2.31582	2.3304	1.93381	2.31849	1.24855	2.13544	2.26991	2.02395	1.9495	1.19159	2.23117	2.45374	2.18984	1.18157	1.95459	2.36366	1.98836	2.58278	2.19243	1.88313	2.25818	2.2999	2.36396	2.04825	2.364	2.47663	2.1009
chr10:129348393-129349332	Olfr816	2.07318	2.17443	2.39493	2.29013	1.62951	2.02503	1.96366	2.26476	2.29282	2.2796	2.40501	2.35128	2.03215	2.29741	2.18917	1.97891	0	2.23784	2.08144	2.0667	2.06551	2.1602	2.15631	2.3044	2.40071	2.18522	2.41408	2.10053
chr7:27320083-27359165	Nlrp9a	2.10472	2.04788	1.99833	2.06029	2.11389	1.97991	2.08693	2.07484	1.97171	2.08018	2.07967	2.03272	2.05146	2.21106	2.04977	3.0246	2.02234	1.97086	2.09429	2.09168	2.02556	2.04503	2.12513	2.04413	2.05815	2.12355	2.13638	2.10019
chr10:111497244-111515566	Glipr1l1	2.04883	2.01483	3.02787	2.07234	2.14072	2.00609	2.03869	2.07594	1.99407	2.14823	2.04544	2.14998	2.00507	2.3402	2.16809	2.05001	2.01658	2.03662	2.05621	1.95883	1.97601	2.11113	2.02526	1.90332	2.0562	2.08233	2.12418	2.099
chr14:25112585-25129181	E330034G19Rik	2.24182	2.1414	2.15914	2.14516	2.18984	2.10692	2.17889	2.24849	2.02808	2.13579	2.07618	1.87268	2.17719	2.5478	2.09045	2.03519	2.11852	2.14318	2.05556	2.14493	2.06212	1.79857	2.14926	2.122	1.8488	1.67611	2.17642	2.09891
chr13:62554375-62568172	Zfp935	1.08914	2.10847	2.08775	2.07289	2.12484	2.12666	2.06895	2.02435	2.23125	2.21587	2.17226	2.03756	2.12799	2.37543	2.35334	2.17798	2.10309	2.05112	2.14124	2.14453	2.15284	2.07801	2.1298	2.07278	2.21619	2.18058	2.00058	2.09872
chr10:128787620-128788565	Olfr782	1.92452	1.97358	2.16927	2.27394	1.74813	1.67424	1.87194	2.06555	2.15853	1.91822	2.00363	2.42009	2.23059	2.48304	2.08535	2.24004	1.88207	1.91741	2.06973	2.44826	1.99001	1.83278	1.86237	1.71131	2.63735	2.7151	2.35413	2.09856
chr4:88428034-88429496	Ifnz	2.64577	0.579036	2.49428	0.922793	2.47851	3.34178	2.50276	0.916961	2.11665	1.13228	0.903039	2.27636	1.02149	0.528434	1.37322	6.73004	3.30515	2.43896	1.80616	1.9708	3.98248	1.94639	1.33421	1.64343	1.90234	2.3668	1.95631	2.0969
chr4:41836783-41842582	Gm13298	2.21629	3.22727	3.26422	2.68931	2.38016	1.96854	3.11714	3.25463	1.067	1.32608	1.49676	0.986858	1.74733	1.86897	1.93472	1.32101	2.99406	3.18074	2.81603	2.83009	2.16326	2.18379	1.95154	2.17337	0.805509	0.821669	0.811635	2.09622
chr19:39585311-39643019	Cyp2c39	2.07214	1.97607	1.99551	2.0186	2.02415	2.0022	1.96559	1.98024	1.90645	1.9544	1.94742	1.9514	2.99399	2.2852	1.98772	2.93354	1.96695	2.01039	2.09905	2.10849	2.11412	1.99091	2.01881	2.07046	2.07371	2.09539	2.03788	2.09558
chr14:3049307-3077025	LOC100861615	1.86678	1.48499	2.01925	1.69515	1.27587	3.10123	1.13299	1.1751	1.07956	2.45308	2.4465	1.97439	1.98905	1.48657	3.05127	2.87585	2.3173	3.4607	1.84085	2.26887	2.28636	1.97448	2.52699	2.37385	2.07974	2.13721	2.1688	2.09418
chr7:10512972-10538934	Vmn2r48	0.467598	2.73287	1.23953	1.89032	3.03741	1.2564	0.533534	1.77975	2.41856	1.79148	2.34497	2.29232	2.81721	1.89563	2.22251	2.20819	1.74728	2.62581	2.14704	1.77163	2.24345	2.78137	1.75233	1.64209	2.94067	2.98802	2.97307	2.09411
chr10:33486229-33501921	Gm4794	2.22445	1.29222	1.23193	2.0212	2.30783	2.08625	1.24656	2.1089	2.0992	2.1741	2.22955	2.31571	2.27955	2.39495	2.17743	2.25465	2.19267	2.1679	2.252	2.22648	2.16774	2.18402	2.22911	2.16585	2.04333	2.20459	2.22822	2.09283
chr15:101473450-101477811	Gm5478	2.26998	2.18894	1.88314	1.98468	2.09544	2.03189	2.95437	2.16128	2.12961	2.33684	2.10472	2.22894	2.20321	2.54601	2.18814	3.41669	2.20785	0.460018	0.47509	2.15212	3.02402	2.17998	0.60319	2.13614	2.075	2.20499	2.2418	2.092
chr8:44710328-44712539	Gm5346	2.14467	2.01121	2.00296	2.38786	1.93004	1.95025	2.0808	2.15938	0.995663	1.94693	1.76038	2.20864	2.22791	2.269	1.97715	2.03908	2.25639	2.12706	2.17259	2.24965	2.10653	2.31964	2.0903	2.13084	2.25795	2.26063	2.4079	2.09153
chr5:109424557-109435455	Vmn2r10	1.86526	1.95029	1.9404	2.18601	2.17869	1.83553	1.99018	2.11963	2.09304	2.12984	2.134	2.08796	2.07711	2.427	2.08976	2.02243	2.05508	2.02474	1.88216	2.1432	2.02254	2.86926	2.12979	2.12017	2.18779	1.98356	1.92411	2.09146
chr14:52331318-52336807	Gm5800	3.00775	2.92355	1.91239	1.8835	2.0909	1.75626	2.12664	1.92055	1.88151	2.02629	2.03182	2.01772	2.93393	2.1997	2.23431	2.07808	1.99312	1.91641	1.94377	2.03383	1.93528	1.88604	1.90643	1.75191	1.9588	2.08308	2.02427	2.09103
chr9:22051873-22064339	Zfp599	2.00928	2.02887	2.98774	2.00885	2.09971	2.00468	1.95939	2.09382	2.13367	2.08028	2.06829	2.13327	2.08182	2.12431	2.17477	2.04532	2.03589	1.91946	2.08256	2.04679	2.10624	2.11297	2.1526	2.0142	2.07363	1.95403	1.89634	2.08995
chr17:13289525-13291338	Gm11166	1.17664	1.35986	1.10592	1.2929	3.00608	2.75802	1.32507	2.39288	1.95954	2.6467	2.67487	2.50503	2.77813	3.09971	2.3503	1.25842	1.8218	1.60268	2.98605	1.49434	1.40411	1.45648	1.41854	1.99071	2.48346	3.27595	2.7662	2.08853
chr2:86530188-86531130	Olfr1087	1.89996	2.56517	1.84315	2.0272	1.80297	1.51193	2.13213	2.28629	1.87069	1.99326	2.18677	2.13961	2.21869	1.86916	1.16711	2.0767	1.89468	2.05517	2.1618	2.21929	2.20653	1.94295	2.13471	2.1694	2.77345	2.76864	2.45741	2.08796
chr15:82219583-82224452	Cyp2d11	1.81104	2.05435	2.06415	2.01003	1.95779	1.96036	2.07839	1.97413	1.97949	2.29807	1.76743	2.11828	2.1538	2.55329	2.09274	3.10939	2.17693	2.03303	2.00017	2.04052	2.11311	2.31035	2.33203	2.18649	1.64461	1.81411	1.74042	2.08794
chr7:147404165-147417044	Cd163l1	1.90773	2.06101	1.95654	2.04229	2.19802	1.90524	2.00273	2.11904	1.99179	2.14667	1.9385	2.127	2.04855	2.17244	2.00163	2.95545	2.12041	2.14663	2.0872	2.03233	1.99803	2.00548	2.07727	1.95686	2.11113	2.17165	2.08826	2.08777
chr12:121184434-121257179	Tmem196	1.91047	1.95628	2.02423	2.08988	2.1652	2.00762	2.03355	2.11064	2.02299	2.07265	2.2284	2.62553	2.04207	2.13727	2.06936	2.00217	2.03872	2.07391	2.07761	2.05106	2.06793	2.05762	2.08174	2.11252	2.10801	2.10405	2.09196	2.08753
chr2:86861766-86862699	Olfr1104	2.36604	2.51938	1.8359	1.97487	1.93586	2.1811	2.26334	2.16652	2.27758	1.00565	2.0042	2.26287	2.12441	2.24985	1.5469	2.0284	1.97973	2.22075	2.31836	1.96512	2.05631	2.01652	2.52381	2.00894	1.99838	2.38472	2.14014	2.08725
chrX:3993613-3995573	Gm10922	1.69437	1.55566	1.7583	1.26616	1.58427	2.82535	1.57413	1.8285	2.637	2.38251	4.15953	2.44909	3.88565	2.81007	4.975	2.04161	1.17917	0.915339	1.54282	1.42793	1.06906	1.35598	1.28087	1.2795	2.57991	1.35015	2.93495	2.08677
chr17:32673573-32688742	Cyp4f16	2.08168	2.17092	2.0902	2.18052	2.03641	2.2724	2.17346	2.12832	2.17488	2.18898	2.13039	1.93683	2.15827	2.21898	1.07315	2.22599	2.0801	2.1225	2.1353	2.06633	2.12227	2.14548	2.11827	2.18353	1.87079	2.13893	2.11262	2.08657
chr14:3049284-3076838	Gm2897	1.86649	1.47588	2.00304	1.69157	1.27035	3.0998	1.12536	1.16675	1.06495	2.44678	2.43248	1.95825	1.97996	1.47243	3.03755	2.85631	2.32067	3.46002	1.83819	2.25988	2.27807	1.96777	2.5214	2.37231	2.07592	2.12632	2.1614	2.08629
chr16:48842664-48844574	Retnla	1.94274	2.05834	2.10471	2.10593	1.98735	2.26998	1.98049	2.24896	2.24483	2.02484	2.23205	2.32845	2.23459	2.04322	2.01643	2.16067	2.12908	2.24728	2.20975	2.29754	2.36068	2.25525	2.20754	2.08511	1.00592	1.17175	2.36962	2.08604
chr7:12778313-12779240	Vmn1r80	2.04919	2.05863	2.03052	1.84349	2.42998	2.01754	1.80826	2.03606	1.15926	2.09672	2.06514	2.31777	1.98876	2.51437	2.47177	1.99228	2.25406	1.85008	2.45288	2.04644	2.05807	2.15395	2.13634	2.32191	2.72827	1.56461	1.87115	2.08583
chr4:42535970-42541769	Gm13298	2.06259	3.15831	3.41771	2.65367	2.60142	2.08433	3.31193	3.26074	1.0968	1.47236	1.54768	1.07904	1.87121	1.78625	1.82563	1.20069	2.93375	2.85989	2.68896	2.805	2.3002	2.16725	1.6361	2.20596	0.708513	0.711644	0.859179	2.08544
chr8:74581558-74582574	Olfr372	2.10654	1.71923	2.18545	1.96062	1.98793	2.91328	1.87038	2.20355	1.91977	2.0712	1.79024	2.14547	3.15787	2.30655	1.87191	3.39848	0.118344	1.81678	2.12275	2.23466	1.90549	1.67003	0.125737	1.9108	2.97538	2.11432	3.70303	2.0854
chr9:35941871-35943215	Gm3434	2.25213	2.20215	2.02562	1.8034	1.77301	2.1164	1.96123	2.12806	2.23714	2.01742	2.25513	3.07277	1.96648	2.08417	1.76172	2.08625	1.88527	1.8074	2.32188	2.08738	1.93099	2.00744	2.0224	1.91419	1.85977	1.87015	2.84458	2.08498
chr7:111041323-111042985	Olfr64	2.01732	2.07959	1.92167	2.12382	2.31888	2.28538	2.26931	1.9832	2.37285	2.03849	2.17471	2.08571	2.07033	1.75885	1.7272	2.36925	1.91638	2.34488	2.19884	2.27952	2.48467	2.23698	2.24782	2.10778	1.54272	1.49944	1.83492	2.08483
chr15:76875504-76882781	Apol6	2.08118	1.96731	1.86424	2	1.96592	2.10383	2.06498	1.93049	2.6076	3.72654	1.89881	1.83853	1.82542	2.21621	2.11362	2.7219	1.93654	2.04335	1.88561	1.85237	1.89683	1.85649	1.98039	2.00653	1.98417	1.92288	1.96841	2.08371
chr19:13575035-13577782	Olfr1477	2.20877	1.87578	2.10039	1.99889	2.07521	1.83099	2.29889	2.28161	2.12108	2.15732	1.23264	2.27424	1.9733	2.53702	1.28599	2.17783	2.35357	2.06436	2.20297	2.0939	1.86564	2.12444	2.2415	2.19287	2.25597	2.43809	1.98657	2.08333
chr2:90092225-90093143	Olfr142	1.92061	2.18815	2.01851	1.96981	2.08395	2.10229	1.63005	2.26786	1.82201	2.10306	2.06216	2.18467	2.1591	2.81386	2.03374	2.13908	1.968	1.96425	1.89135	2.05102	1.88372	2.11418	2.16956	2.14725	2.12577	2.53041	1.90363	2.08326
chr2:36543523-36544453	Olfr346	1.94761	1.88449	2.30025	2.21818	2.2326	2.11071	2.17507	2.1725	0.964368	2.22853	2.12621	2.31951	2.27989	1.13837	2.31105	1.82047	2.00407	2.11612	2.0251	1.89752	2.19528	1.82883	2.35945	2.31014	2.2595	2.46501	2.53824	2.08256
chr17:36264553-36266370	Gm7030	3.07809	2.4358	3.06645	0.915567	3.3921	2.9394	4.30608	1.56702	1.0291	2.56339	0.817162	1.17386	0.73906	0.888936	1.97149	2.24643	0.931062	2.77687	1.71112	2.90003	2.25263	0.836842	2.97393	1.13385	2.62047	1.62188	3.3276	2.08208
chr10:128569886-128570822	Olfr770	2.12343	1.95103	2.3132	2.21088	2.12684	1.77473	2.16951	2.13321	2.16943	1.89478	3.08141	3.63178	2.16431	2.14996	1.7874	1.84234	2.47864	2.03072	0	2.00163	2.2862	1.98533	1.3852	1.82942	2.2572	2.05263	2.36824	2.08146
chr17:31278006-31281227	Tff2	1.80964	1.85113	1.96167	1.97831	1.88801	1.82821	2.14217	1.93888	2.18524	2.3478	1.92612	1.91228	2.21575	2.32798	2.3559	2.19349	1.90976	2.2023	2.94782	2.00427	1.98513	1.98888	2.03288	2.12568	2.0769	2.26599	1.79313	2.08131
chr6:18816317-18829584	Ankrd7	2.13391	2.20215	2.0837	2.1305	2.15991	2.1634	2.25221	2.23225	2.09673	2.17799	1.58079	1.88852	1.85643	2.40558	1.89675	1.85051	1.85054	2.1595	2.10215	2.17947	2.08686	2.15533	2.09129	2.06992	2.2485	2.14642	1.9505	2.0797
chr7:51462804-51467124	Klk1b4	1.95796	2.03445	2.18835	2.21188	2.08108	1.86704	1.90009	2.11479	2.01552	2.09016	2.24875	1.97768	2.02647	2.36425	2.20483	1.89624	2.00055	2.06515	2.16897	2.24945	2.21421	2.11734	2.12971	1.9988	2.05518	1.94277	2.02853	2.07964
chr14:56678580-56681147	Mcpt4	2.07738	1.84442	2.13405	1.88544	1.95407	2.09295	2.00647	2.16727	2.01617	2.03717	2.26897	2.21633	1.91055	2.12044	1.96796	1.93194	1.80168	2.30817	2.02067	2.10357	1.98895	2.19647	2.09289	2.132	2.17589	2.23029	2.45978	2.07933
chr12:3235790-3250374	1700012B15Rik	2.00177	2.1008	2.03318	2.12996	1.89523	2.14985	1.96772	1.91496	2.04741	1.9127	1.89605	2.02948	2.10879	1.94597	2.10799	1.99	1.97298	2.00886	2.05083	2.07156	3.09148	2.09148	1.96674	2.08074	2.17886	2.21633	2.17381	2.07909
chr6:41365305-41369592	Gm5409	1.81833	2.4261	0.754441	0.676207	1.43418	1.90274	1.35029	2.45207	2.32259	1.82593	1.93085	0.49301	1.67386	1.56091	2.06398	2.83088	2.85998	3.66359	2.09337	3.79739	3.57219	0.810403	1.31698	2.93157	2.6976	2.13443	2.71055	2.07794
chr4:118426199-118427141	Olfr1338	2.28426	2.39162	2.09579	2.12933	2.6309	2.34978	1.83674	2.26244	2.35834	2.63211	1.19186	1.21585	2.54051	1.46002	1.17033	2.01826	2.53003	2.43624	2.22849	2.4922	2.19674	1.97218	1.90271	2.25634	1.55349	1.93551	2.01794	2.07741
chr11:73934792-73935740	Olfr401	2.14086	2.1064	2.15874	2.49161	2.12761	1.84019	2.44782	2.17957	2.36236	1.83219	1.71662	2.19585	0.979034	2.31206	1.6738	1.95318	2.16146	2.20477	2.19959	2.13133	1.89381	2.1486	1.97647	2.05724	2.61428	2.24108	1.94143	2.07733
chr1:90396445-90406641	Glrp1	2.01148	1.9973	2.00009	2.00996	2.02941	2.03781	1.9508	2.00342	2.0953	2.10462	1.98262	1.99786	1.99356	1.95235	2.08198	1.97549	1.9092	1.93963	2.09119	1.98846	4.03673	2.12011	2.00791	1.94588	1.81465	1.98731	2.01914	2.07719
chr19:8136698-8206472	Slc22a28	1.93666	1.936	1.91889	1.91197	2.12675	1.95011	1.98998	2.02849	2.08069	2.13966	2.11111	2.10182	2.18554	2.5652	2.29103	2.25335	2.0739	2.04527	1.99327	2.26171	2.13597	1.99533	2.01248	2.00427	2.02484	2.04149	1.96641	2.07712
chr9:38185467-38186418	Olfr251	2.04311	2.6487	1.97785	2.04149	1.88866	2.20451	2.26365	1.92683	2.07937	2.25082	2.14097	2.39462	2.05348	2.31443	1.87588	2.033	2.29911	2.3139	2.08212	2.05509	2.34481	1.90591	2.35198	2.13342	1.64453	1.87213	0.929032	2.07664
chr7:93812173-93813184	Olfr293	1.30909	1.82584	2.35444	2.02927	2.68129	0.036025	2.05178	0.0308852	2.36241	2.13581	1.24099	2.77369	2.73446	2.99164	2.41758	1.35613	2.50465	2.26575	2.33079	2.02583	2.32686	2.40708	2.51218	2.21056	2.32812	2.61008	2.17572	2.07515
chr7:24593304-24594219	Vmn1r175	2.03743	2.58495	1.41396	1.19866	2.10718	1.92969	1.9509	1.92361	2.06472	1.6218	2.14576	2.42761	1.81809	2.16452	2.05381	2.05545	2.14573	2.06571	2.29476	2.18907	1.85306	2.25314	2.11261	1.88715	2.72772	2.48758	2.48614	2.0741
chr7:7184037-7200039	Vmn2r29	1.40006	2.50248	1.40053	2.61261	2.87648	1.78623	1.46669	2.37239	2.52855	2.4089	1.91759	2.13497	2.62991	3.11615	2.3034	2.35327	1.44938	2.0109	1.69065	1.48365	1.49025	1.55892	1.43442	1.4869	2.37931	2.58652	2.61692	2.074
chr7:51471844-51476073	Klk1b5	2.07664	2.09024	1.89061	2.1622	2.22099	1.83722	1.98055	2.061	2.07248	2.26248	2.19907	2.2114	2.11153	2.18899	1.94587	2.06257	1.94246	2.03521	2.16804	2.17281	2.05451	1.89488	2.13321	2.05989	2.00586	1.98719	2.15671	2.0735
chr6:122086645-122100976	Gm10319	2.10238	2.06006	2.08344	1.99049	2.14008	1.90261	2.09852	2.0853	2.05684	2.13411	2.16263	1.11097	2.09512	2.37439	2.15197	2.35974	2.06533	2.03094	2.23066	2.13902	2.02263	2.15008	2.11926	2.13973	1.97428	2.07098	2.08445	2.0717
chr7:27220131-27260477	Nlrp4a	2.05357	2.02136	1.99755	2.0771	2.12937	1.93989	1.97897	1.99366	2.03147	2.1495	2.02997	2.03423	2.01641	2.14404	2.03781	3.09387	1.97798	1.97827	2.02355	2.00099	2.06792	2.04744	2.02495	1.95935	2.03714	2.06688	2.01985	2.0716
chr7:50072196-50122604	Gm2381	2.11171	2.12674	2.03346	2.04623	2.17011	1.99858	2.09706	2.07124	1.93849	2.1185	2.12916	2.16796	2.15774	2.45757	1.2272	1.90956	2.09802	2.09259	2.10901	2.0374	2.11275	2.12103	2.05475	2.09893	2.10446	2.15614	2.12107	2.06917
chr16:11193129-11203385	Rsl1d1	2.04155	2.05872	2.06269	2.09246	2.03479	2.3257	2.02721	1.94891	2.08828	2.05145	1.98443	1.84587	2.11363	2.03735	2.14019	1.9982	2.00051	2.99634	1.91476	1.93793	2.00794	1.93819	2.04878	1.98264	2.00589	2.13026	2.03335	2.06845
chr8:22766238-22767208	Defa17	3.73501	1.92506	2.13591	1.88867	2.81861	1.14226	3.64597	2.15556	2.49408	1.9914	2.5855	3.71679	2.40795	2.81822	1.81161	2.66852	1.80071	1.37784	2.0687	2.60099	0.936739	2.15653	2.46411	1.58692	0	0.00606853	0.876344	2.06726
chr17:34111603-34115736	H2-K2	1.9958	2.02126	1.86815	1.86849	1.60324	1.67558	1.94572	1.89684	4.03448	1.69985	2.22579	2.85063	2.72167	3.15619	1.98946	2.17649	1.88454	2.32637	2.22306	1.74833	1.9498	2.04795	1.95502	2.21042	1.26584	1.32975	1.1417	2.06713
chr17:38191543-38196729	Olfr129	1.9773	2.02582	1.98879	2.00202	1.98098	1.69924	2.08544	2.05134	2.01113	2.06296	2.20305	2.09967	2.02274	2.00955	2.8569	2.09152	2.05712	2.00048	1.98088	2.02952	1.9471	2.04075	1.85457	1.96188	2.34195	2.17496	2.24797	2.06688
chr6:128349783-128358953	Nrip2	2.00946	1.8888	2.10477	2.04091	3.05917	2.13499	2.1152	1.98863	2.03026	2.08244	2.09566	2.11858	2.01378	2.03319	2.00391	1.94919	2.07155	2.00254	2.06517	2.07165	1.9474	2.02029	1.99255	2.05452	1.8904	1.97155	2.04723	2.06681
chr17:7109064-7152705	Rsph3b	1.83986	2.01652	1.81502	1.62794	2.59469	2.07643	1.99687	2.27651	2.02457	1.91102	2.28603	2.17444	2.10386	2.14658	1.23652	2.61428	2.7252	2.16472	2.46695	2.64869	1.789	1.74658	2.1228	2.11343	2.12535	1.60176	1.55226	2.06659
chr19:11543857-11556686	Ms4a6c	2.0923	2.09768	2.02905	2.01166	1.19518	1.91075	2.08498	2.15648	2.15723	2.17638	2.1272	2.29296	2.13441	2.28598	1.99968	2.12056	2.04845	2.17541	2.12542	2.16425	2.10724	2.00616	2.12577	2.09986	2.06028	1.88343	2.10799	2.06581
chr19:11543857-11547226	Ms4a6c	2.08009	2.08631	2.02416	1.9327	1.25447	1.854	2.03388	2.03749	2.19961	2.17092	2.0956	2.0998	2.16704	2.41203	1.94205	2.21065	2.05483	2.26857	2.15218	2.12483	1.90183	2.10555	2.05766	2.11734	2.23396	1.93648	2.20947	2.06531
chr8:3803124-3803361	Rprl3	1.7508	2.34427	1.79019	2.15891	1.95103	2.22558	1.86933	1.82932	1.99281	2.43299	2.17196	2.71832	2.74032	2.43896	2.14333	2.05161	1.7498	1.89952	1.75542	1.94358	1.85582	1.68878	2.00954	1.9781	2.49444	1.68691	2.08538	2.06507
chr7:27716649-27724405	Cyp2a22	2.10239	2.08447	2.18643	2.10076	2.25514	1.97338	2.13736	2.12671	2.13223	2.19252	2.18455	2.10937	1.99175	2.25448	2.19422	1.06345	1.91339	2.06467	2.01818	2.09478	2.15135	2.00622	1.97798	2.05671	2.16195	2.1288	2.08038	2.06458
chr14:74755333-74769548	4933402J15Rik	2.08171	2.12117	1.99636	2.0392	2.05346	1.9966	2.05191	2.04192	2.03045	2.02145	3.01618	2.00609	1.9297	2.02844	1.92296	2.02198	1.92571	2.04869	2.03932	2.00514	2.08866	1.98414	2.01437	2.06661	2.10666	2.00473	2.08052	2.06386
chr13:15899075-15919370	A530046M15	2.01118	1.96747	2.0959	2.03637	2.15606	2.07523	1.93981	1.84962	1.97449	2.09073	1.97757	2.0495	1.99989	1.94636	1.96424	2.07168	2.04976	2.047	1.99032	2.04121	2.10291	2.99026	1.9977	2.10773	2.01664	1.99122	2.13915	2.06222
chr10:21864109-21869076	E030030I06Rik	2.55157	2.11828	2.8476	3.00211	2.00791	2.13458	2.04005	2.27937	1.75895	1.36691	0.917339	1.89776	1.55571	2.51082	0.93173	1.81398	2.95596	2.70879	2.20487	1.61108	1.04521	2.33917	3.725	2.0136	1.52755	1.13677	2.63783	2.06076
chr15:82200956-82210690	Cyp2d22	2.10112	2.00593	2.01086	2.14485	2.05672	2.15339	1.87642	1.95182	2.06345	2.07661	1.84277	1.87921	2.13479	1.84258	2.01926	3.14163	2.00484	2.08464	1.86002	2.00045	2.02493	2.06908	1.93805	2.10942	1.94232	2.05732	2.19428	2.05877
chr7:93100376-93109992	Vmn2r74	2.13218	2.1872	2.03751	2.0025	2.05053	2.05454	2.02123	2.17384	2.1111	2.1324	2.23388	2.17055	2.06916	2.26293	2.23172	1.0183	2.08682	2.09753	2.0819	2.06169	2.0644	1.94779	2.11341	2.10209	1.96741	2.11155	2.05863	2.05862
chr7:7165706-7231000	Vmn2r29	1.61923	2.21958	1.21054	2.63143	2.80635	2.15096	1.68343	2.80927	2.55982	2.43172	2.17359	2.20597	2.26004	3.04899	2.43871	2.39637	1.72844	1.81629	1.5753	1.62802	1.50566	1.40283	1.36475	1.61361	2.09797	2.06568	2.12912	2.05828
chr10:129382159-129383116	Olfr818	2.49157	2.22343	2.20366	2.21532	1.93154	1.90293	2.1096	2.13071	2.20994	2.14445	2.34779	2.2009	2.38093	1.94457	2.45537	2.45448	0	1.9894	2.18125	1.83115	2.10915	2.02613	1.91249	2.13663	2.02033	1.93813	2.07917	2.05819
chr3:59533707-59556319	Gm5538	2.07587	2.00809	2.14426	2.05434	2.17137	2.04296	2.11116	2.08045	2.03293	2.02583	2.13346	1.06815	2.06223	2.19768	2.15912	2.12571	2.06388	2.11169	2.07119	2.08303	2.11401	2.06474	2.15476	2.07404	2.18198	2.036	2.10847	2.05768
chr17:7529008-7550209	Tcp10a	2.37823	2.33484	1.70238	1.8305	2.57571	2.10304	1.87939	2.1053	2.06774	2.29771	1.93366	1.83411	1.9155	2.34286	2.03504	1.70699	1.97608	1.98579	2.3497	2.05697	1.99336	2.04405	1.91747	2.22912	2.18797	1.89549	1.84449	2.05643
chr7:115773507-115774440	Olfr508	2.19628	2.0388	2.33393	1.91998	2.29918	2.16847	2.22525	2.12455	2.15251	1.99358	2.12988	2.06036	2.20937	1.99722	1.9012	2.37352	2.30842	1.30539	2.26778	1.07693	1.0051	2.01435	1.88932	2.18852	2.56519	2.17863	2.59153	2.05612
chr2:129190315-129196856	Il1b	2.02156	1.89063	2.00706	2.10573	1.93814	2.04052	2.10107	2.06028	2.04621	1.94671	1.95368	1.9816	2.06963	1.97412	2.17278	2.17394	2.01697	2.05783	2.06103	1.99481	2.10163	2.12587	2.20578	2.07106	2.08838	2.14949	2.1198	2.05468
chr17:36245974-36248621	C920025E04Rik	4.19584	2.25862	2.87946	0.872236	4.45213	4.30887	5.38683	1.74046	0.580979	3.02684	0.565984	0.537706	0.564859	0.696321	1.3925	1.78188	0.805028	4.03705	2.01523	1.96619	1.49772	0.823875	2.76598	0.835448	1.67727	0.920231	2.86449	2.0537
chr8:107355543-107362552	Ces2b	2.18217	2.1499	2.20834	2.05115	2.00256	2.13353	2.05613	2.04732	2.06075	2.09694	2.14851	2.14114	2.16628	1.80295	1.86533	1.0291	2.24269	2.1603	2.10166	2.16301	2.05773	2.11905	2.15011	1.96897	2.13606	2.04916	2.12602	2.05248
chr4:62160087-62163234	Hdhd3	2.08551	1.95716	2.2333	1.96074	1.83449	2.32483	1.77755	1.95907	1.84617	1.93112	1.90939	1.97647	1.92117	1.89846	2.12553	1.97579	1.92749	1.82279	1.97414	2.00038	3.72285	2.15801	1.84716	2.23695	2.02328	1.78125	2.20291	2.05237
chr2:88365657-88366747	Olfr1186	2.21006	1.61895	2.25471	2.01057	2.20941	1.89571	2.23115	1.97	2.0114	1.96136	2.3775	1.8786	2.22969	1.88992	2.17968	1.68884	2.10517	1.95289	1.77912	2.43657	0.954894	2.15392	2.28317	2.26677	2.3669	2.22695	2.25485	2.05181
chr1:176019168-176020111	Olfr429	2.13904	1.96472	2.29519	2.21302	1.74725	2.13255	1.78132	2.23874	2.18811	2.09248	2.12561	2.12928	2.15223	2.01131	1.75782	1.79882	1.89747	1.92655	2.30173	2.04349	2.13163	1.99772	1.94649	2.02775	1.73784	2.28526	2.31	2.05087
chr2:87736333-87737290	Olfr1153	1.93067	1.95863	1.84943	2.00142	2.04016	1.49306	2.28388	2.11618	2.01138	1.94295	2.27878	2.34481	0.829988	2.18248	1.96499	2.27339	2.14578	1.9973	2.07224	2.00861	2.18689	2.28136	2.19153	2.15254	2.38358	2.19762	2.22885	2.04994
chr7:110531575-110532514	Olfr603	1.61234	1.60954	1.88412	1.72534	1.87334	1.94489	1.99568	2.16005	2.53665	1.92394	1.99797	2.7383	2.05741	2.81655	1.61129	2.10603	2.13137	1.73275	1.57107	2.43468	1.84446	1.91701	1.92393	2.19437	2.12283	2.34555	2.53472	2.04986
chr7:24289660-24290608	Vmn1r167	1.77697	1.91739	1.75981	2.20689	2.27783	1.94441	2.07544	1.98703	1.90863	0.975671	1.89416	2.23357	2.00699	2.30115	2.18462	2.21558	2.13047	2.39801	2.33322	1.92466	1.96757	2.14977	1.98752	2.09272	2.02615	2.41553	2.219	2.04855
chr9:38175132-38176128	Olfr250	1.96063	2.39394	2.38181	1.86231	2.13711	2.1891	1.95773	2.3031	2.26344	1.91643	2.10014	1.43029	2.0696	1.98198	1.86286	1.62797	2.39615	2.05233	2.07947	2.16911	2.24569	2.24204	1.97196	2.05182	1.67538	2.62067	1.36224	2.04834
chr9:109225751-109242173	Fbxw28	1.86953	3.43392	3.11115	3.16678	3.3709	1.64959	3.19594	2.38132	2.22734	2.02475	0.887269	1.68777	0.565247	1.92522	1.56457	2.06429	2.09133	1.40215	1.67698	1.19548	1.66851	1.67281	2.50966	1.59518	2.03335	2.1862	2.142	2.04812
chr7:20686506-20687430	Vmn1r91	0.952231	1.39782	0.324178	1.20022	2.15776	1.57562	0.403622	0.385795	3.45233	2.2771	3.31477	4.97115	3.73012	6.05799	2.98358	1.82746	1.65251	0.59892	2.80695	0.16784	2.47718	1.63015	2.10415	0.129489	1.93431	2.31256	2.44382	2.04702
chr2:10420024-10420097	Mir467a-1	1.53939	2.51401	1.84824	1.72086	1.89249	1.12994	1.69904	2.31714	1.55982	0.966162	2.86569	1.53815	1.80287	0.789471	2.20903	2.87401	2.73966	2.49297	1.74588	2.16946	2.20362	1.52187	2.57638	1.62142	3.07181	3.20841	2.63042	2.04623
chr15:12737931-12754412	6030458C11Rik	1.92829	2.00184	2.10437	1.94752	1.90827	2.07482	1.90055	1.87973	2.88942	1.94202	1.89637	2.85736	1.99029	2.88934	1.97411	1.85339	1.85506	1.95014	1.92282	1.90961	1.88552	1.88441	2.04667	1.88816	1.951	1.92624	1.98314	2.04594
chr2:10420019-10420102	Mir467a-2	1.53939	2.51401	1.84824	1.72086	1.89249	1.12994	1.69904	2.31714	1.55982	0.965334	2.85671	1.53815	1.80287	0.789471	2.20903	2.87401	2.73966	2.49297	1.74588	2.16946	2.20362	1.52187	2.57638	1.62142	3.07181	3.20841	2.63042	2.04587
chr9:22030155-22044137	Zfp809	1.96628	2.00394	2.99129	2.06508	2.04783	2.11486	2.06537	1.99482	2.02084	2.12423	1.97939	1.9448	1.97683	2.05644	2.21864	1.99627	1.90085	1.90678	1.97028	1.97592	1.92539	1.89772	1.92805	2.0375	2.03426	2.00719	2.07251	2.04531
chr15:37853707-37890810	Rrm2b	1.91604	3.08602	2.01223	1.96556	2.00276	2.05649	2.01475	1.99478	2.04282	2.06725	1.96778	1.9637	2.01056	1.99242	2.06974	2.07864	2.0418	2.02137	2.01938	1.97204	1.98942	1.95422	1.95583	2.0214	1.97733	2.05898	1.96698	2.0452
chr9:22030146-22044137	Zfp809	1.96617	2.00379	2.99149	2.06522	2.04732	2.11501	2.06501	1.9947	2.02048	2.12416	1.97896	1.94432	1.97657	2.05665	2.21831	1.99611	1.90127	1.90672	1.96992	1.97567	1.9253	1.89718	1.92777	2.03698	2.03432	2.00706	2.07263	2.04515
chr7:34728015-34730004	Scgb2b26	2.01433	2.22938	2.09654	2.14182	2.01229	1.80219	2.38653	2.1113	2.21768	1.93683	1.97475	2.25354	2.11615	2.15675	1.96322	2.06171	1.9462	0.981778	2.21097	1.97971	1.84516	2.1332	2.22093	2.08377	2.10778	2.04338	2.18662	2.04498
chr9:37868906-37869836	Olfr885	1.35889	1.79285	0.906682	2.25063	2.07417	2.17033	1.70213	2.08058	2.0141	2.03757	2.17213	2.27423	1.47845	2.05618	2.29107	2.19275	2.21501	2.03956	2.4659	2.20527	2.28114	1.92336	2.43696	2.35163	2.31703	2.38026	1.74546	2.04497
chr9:109225399-109242173	Fbxw28	1.86336	3.4273	3.10774	3.16113	3.37546	1.64417	3.19292	2.38175	2.2114	2.01311	0.891987	1.67843	0.575156	1.91712	1.57495	2.06564	2.08445	1.39727	1.67526	1.18664	1.66445	1.66772	2.49086	1.59953	2.03189	2.18097	2.13412	2.04425
chr7:21572303-21573227	Vmn1r113	1.26005	2.3659	3.53454	0.998478	1.38887	3.44394	2.19376	2.30387	3.29819	1.3079	1.56305	3.95702	1.03107	2.99554	1.20424	1.03875	0	2.93016	0.291924	2.14813	1.91359	3.42327	2.8953	3.26739	0.300998	2.71835	1.40468	2.04367
chr11:49308036-49308966	Olfr1385	2.05818	1.90165	1.98239	2.12243	2.01841	1.84095	2.31433	1.68523	2.37114	2.20406	2.20335	2.0204	2.13585	2.39859	2.26417	1.81464	1.98877	2.05578	2.12469	2.00216	1.97014	1.98842	1.65305	1.83383	1.98513	2.15615	2.06701	2.043
chr16:11203475-11225889	2610020C07Rik	2.0124	2.02926	2.12423	2.07081	1.98283	2.26431	2.039	1.97325	2.11552	1.89171	1.80437	1.99016	2.1334	1.91809	1.87571	1.64586	2.03366	3.10432	2.00964	2.0743	2.03051	1.96827	2.05924	2.05256	1.98611	1.98795	1.98295	2.04298
chr17:31091627-31147655	Umodl1	2.01168	1.93427	1.95157	2.00851	1.89126	1.78663	1.98054	1.92038	2.00336	2.02587	1.93329	1.84115	2.9781	2.07565	2.07028	2.96131	1.97828	1.97213	1.96465	1.94962	1.93737	2.00987	1.96627	1.9472	1.97917	2.07067	1.97185	2.04152
chr13:22179746-22180673	Vmn1r188	2.07875	2.06797	1.73523	2.38112	1.94373	2.17955	2.07954	1.67048	1.68228	1.75145	1.84898	2.09653	2.03839	2.16689	2.23652	1.92654	2.02872	2.04906	2.06729	2.06556	2.18736	2.05396	2.48172	1.92094	2.03301	2.32209	2.01752	2.04115
chr7:110880441-110881392	Olfr628	1.61149	1.41324	1.45129	1.46596	1.47718	1.30367	1.49723	1.46823	1.65676	3.3119	2.74503	3.13947	2.31608	2.4291	2.63056	2.84904	1.65884	1.5808	1.59681	1.60941	1.6118	1.76932	1.60582	1.88057	3.28293	2.97009	2.76301	2.04058
chr2:129195637-129201469	Gm14047	1.95188	1.97669	2.02343	1.93785	1.97003	2.00607	1.93533	1.9053	1.9859	2.08932	2.06593	1.97296	2.16283	2.15479	2.10102	2.21717	2.17078	2.12825	2.01854	2.03075	2.025	2.11098	2.06846	2.06082	2.00132	1.92592	2.09552	2.04048
chr10:117125960-117147772	Mdm2	2.02083	2.09302	2.05258	2.02884	2.01542	2.10488	1.97797	1.9551	2.09509	2.04568	2.02559	1.93348	1.96013	1.9214	2.15878	2.08882	2.91508	1.99973	1.87693	1.90048	1.93061	2.01818	1.85124	1.96683	2.09005	1.97634	2.05851	2.03932
chr11:73218951-73223360	Olfr75-ps1	2.02716	2.09548	1.94826	2.01799	2.03736	2.19828	1.97625	2.15417	2.54396	1.56545	1.95755	1.85555	2.05071	3.01293	1.88444	1.0988	2.01771	1.92643	2.12689	2.13773	2.06038	1.94823	2.03096	1.95097	2.19925	2.08262	2.14724	2.03899
chr7:13763067-13764018	Vmn1r88	2.15565	1.94398	2.20243	1.83761	2.18072	1.8956	1.98743	1.80052	2.06584	2.02227	1.79864	2.21359	2.00472	2.15792	2.42309	1.97702	2.0335	1.79046	2.24447	1.80453	1.89755	2.09944	2.36868	1.94136	1.95076	2.32585	1.91271	2.03838
chr11:73218951-73223325	Olfr75-ps1	2.02675	2.09596	1.95118	2.01451	2.03413	2.19958	1.97235	2.15734	2.54	1.57014	1.95495	1.85323	2.04987	3.00979	1.88271	1.10309	2.01905	1.92698	2.12412	2.13839	2.05735	1.94571	2.02321	1.95069	2.19847	2.08756	2.14541	2.03824
chr14:77424007-77436424	Lacc1	2.04548	2.07108	2.0042	2.98452	1.99944	2.25113	1.95511	1.98407	2.09134	2.0866	2.01644	1.96976	2.14453	1.9078	2.11535	2.05285	1.92423	2.05964	1.95598	2.03002	1.97778	2.05905	2.03946	1.97858	1.78364	1.77588	1.76305	2.03804
chr5:152445398-152453783	Rfc3	2.03018	2.06736	2.08842	1.9912	2.09774	2.22603	2.07239	1.91418	1.97583	1.75936	2.1502	2.38252	2.03048	1.81114	1.98918	1.90505	2.07861	1.95817	1.82209	2.08567	2.12383	1.91384	2.03242	2.21731	2.30277	2.02401	1.95526	2.03723
chr13:120217713-120249127	Paip1	2.07241	2.13551	2.06411	2.044	2.0061	2.24859	2.07954	1.92633	2.03964	1.98945	2.00817	2.01709	2.18328	1.91442	2.04617	2.01097	2.09973	2.05798	2.05093	2.02849	2.01097	1.99319	1.99048	1.99065	2.02441	2.01666	1.93891	2.0366
chr2:150923980-150929545	Gm14151	2.20306	1.08421	1.10712	2.10193	2.26867	2.23683	1.22013	1.13861	1.76169	2.42897	2.2989	1.79084	2.265	2.40366	2.19156	2.27818	2.0934	2.27869	2.20991	2.31356	2.11513	2.37889	1.84397	2.30559	2.03175	2.4812	2.14008	2.03598
chr9:22030146-22047798	Zfp809	1.99695	1.98619	2.99027	2.06378	2.01999	2.06315	2.03418	1.99074	2.03726	2.10844	1.95971	1.92009	1.96293	2.05889	2.18294	2.00352	1.91307	1.91034	1.96927	1.97407	1.9056	1.87812	1.91941	2.04972	1.99563	2.00455	2.06266	2.03561
chr10:51210780-51216417	Lilrb4	2.2146	2.68397	1.90511	2.17509	2.56858	2.11908	2.48928	2.22673	2.11322	1.25889	1.96022	2.14418	2.54906	2.49761	1.8786	2.26296	1.93452	2.40812	1.5023	2.077	2.56715	1.52643	1.72589	1.4023	1.46973	1.40121	1.89595	2.03547
chr19:13889133-13890078	Olfr1499	1.82564	2.16388	1.77275	2.07394	2.29432	1.96863	2.08251	2.03956	2.00372	2.24013	1.93629	2.44875	2.01142	2.10865	2.07066	1.98563	2.17077	1.80869	0	2.09559	2.243	2.16944	2.06785	2.11537	2.55665	2.28908	2.4141	2.03545
chr13:120217406-120249127	Paip1	2.07723	2.13223	2.06619	2.0395	1.99435	2.25104	2.0741	1.91866	2.03606	1.98054	2.00224	2.01335	2.18795	1.90926	2.04817	2.01277	2.09848	2.06247	2.05267	2.03084	2.01122	1.99441	1.99645	1.99014	2.02553	2.00997	1.9388	2.03536
chr6:41918138-41923089	Sval3	2.02875	2.16361	2.13162	2.23489	2.21032	2.16894	2.08512	2.01833	2.17652	1.98727	2.15876	2.24479	2.11337	2.00493	2.0498	1.96466	2.11334	1.83272	2.09163	2.05964	2.16185	2.14021	2.28689	0	2.13409	2.19253	2.18654	2.03486
chr4:118362107-118363055	Olfr1342	1.88846	2.2877	2.31897	2.40422	2.02823	2.27773	1.97407	1.32109	2.19807	1.98827	2.02466	2.13021	1.93209	2.22024	2.12791	2.10224	1.84768	2.03158	1.90382	1.99737	2.17621	1.95927	1.9122	1.90667	1.91736	2.04819	2.01367	2.03475
chr13:67490264-67500703	Zfp429	2.42807	2.37939	2.4157	2.17938	2.29366	2.3025	2.27779	2.36764	2.21511	2.11533	2.3243	2.38515	2.32794	2.3101	2.36974	2.37016	1.34806	1.3456	0.469467	2.3881	1.32617	0.432515	1.47509	2.4385	2.20314	2.20455	2.24018	2.03457
chr7:34158252-34159577	Scgb1b20	2.00942	1.87773	2.04133	2.08682	1.41909	1.77468	2.07446	2.20992	1.9516	2.37496	1.89168	2.01744	2.30747	2.18249	1.81556	2.09279	2.11717	2.25258	2.33327	2.02791	2.19955	2.12566	2.08427	2.00749	1.7169	2.27182	1.66736	2.0345
chr5:105544785-105568571	Gbp4	2.06116	2.00299	2.02965	1.97689	1.99406	1.96857	2.03771	2.06485	2.0937	2.14334	2.16218	2.19973	2.06368	2.10697	2.10535	2.10083	2.06699	1.05638	2.10569	2.11376	2.09461	2.10011	2.01038	2.04926	2.07793	2.05407	2.08071	2.03413
chr5:105544785-105568605	Gbp4	2.0609	2.00256	2.02956	1.97706	1.99582	1.96905	2.03738	2.0646	2.09338	2.14222	2.16205	2.19963	2.06259	2.10778	2.10606	2.10101	2.0679	1.05608	2.10574	2.11351	2.09457	2.09992	2.00975	2.04847	2.07812	2.0544	2.08121	2.03412
chr7:49515422-49556125	Vmn2r61	2.00062	2.01143	1.99015	1.9116	2.06457	1.93484	2.07098	1.90072	2.06288	2.10275	2.17632	2.18343	2.06061	2.3405	2.16418	2.11281	2.10089	2.04639	2.00062	2.04866	1.99251	2.06534	1.05773	2.02084	2.16694	2.18465	2.12042	2.03309
chr4:88403747-88404296	Gm13286	1.58851	1.065	1.98916	2.58887	0.732777	5.27046	1.43515	1.09187	2.24346	1.2529	0.802825	1.25213	6.07372	1.15986	1.02583	2.37903	4.96126	2.44014	0.868573	2.04538	5.16802	3.20704	1.06106	0.597077	0.924775	0.803036	0.847236	2.03241
chr18:60535682-60552283	Iigp1	1.95199	2.01118	1.99928	2.13659	2.0285	2.07604	2.03938	2.19787	1.33234	2.0686	2.11539	1.31774	2.19697	2.20261	2.28646	2.02547	2.00126	2.02349	2.19661	1.92927	2.02873	2.21945	2.14971	2.05279	2.03971	2.08054	2.1627	2.03225
chr7:93296551-93320234	Vmn2r75	2.01406	2.06045	2.02577	2.01393	2.02115	1.96701	2.07857	2.00731	2.08225	2.18208	2.10972	2.20643	2.06534	2.28735	2.18416	1.09771	2.06603	2.09461	2.04461	2.02931	2.04923	1.89881	2.05111	2.03875	2.17895	2.00752	1.97249	2.03092
chr6:41342354-41347255	Gm5771	1.57038	2.39368	0.949321	1.27005	2.34915	1.59439	2.16861	2.75214	2.30141	1.34304	1.27195	1.61752	2.53907	2.16516	1.50753	1.55069	1.70004	2.5853	3.04973	3.0518	3.11839	0.99565	2.04445	2.38441	2.22783	2.2831	2.02909	2.03014
chr10:128448342-128449272	Olfr763	1.84691	1.91834	2.18945	1.72735	2.33887	1.91507	1.6847	1.78099	2.44156	1.98317	2.18597	2.22162	1.7261	2.78146	1.86102	1.7513	2.09876	1.77794	1.89563	2.12448	2.22519	1.84034	2.48794	1.89995	1.95454	1.87457	2.2758	2.02996
chr6:132156812-132160539	Prb1	2.2705	2.10035	2.28371	2.02769	2.15344	2.01677	2.41194	2.2585	1.8365	1.07999	2.22901	2.21644	1.86257	1.89723	1.21423	1.88958	2.09315	2.11812	2.17403	1.97191	1.65888	2.07784	2.39347	2.26485	1.99381	2.29357	2.01782	2.02985
chr14:56590264-56592832	Cma2	2.33297	2.00057	2.29795	1.97767	2.19045	1.94438	2.00935	2.27423	2.14711	2.25348	2.48359	2.44449	2.44007	2.27129	2.15171	2.31725	1.67571	1.6916	2.33079	2.26547	2.19874	1.56028	1.39998	1.78292	1.73779	1.04769	1.57121	2.02958
chr6:41901626-41906097	Sval1	2.05644	2.13382	1.97872	2.31249	2.25241	2.09361	2.21692	2.11353	2.04196	1.79227	2.10403	2.23724	2.05153	1.91229	2.07311	2.02947	2.0057	2.05694	2.12419	2.22465	2.23642	2.0804	2.30937	0	2.02833	2.27011	2.05789	2.0294
chr19:8234657-8293329	Slc22a29	1.01	1.9909	1.98123	1.97612	2.08198	1.95152	2.05237	2.01496	2.04143	1.10985	2.08264	2.07921	2.09516	2.40592	2.07031	2.15365	2.09194	2.03691	2.04854	4.14717	2.10936	2.02281	1.09007	2.0022	2.05833	2.04459	2.03372	2.029
chr7:19374473-19383859	Psg19	1.88122	0.903251	1.00762	1.9982	2.15236	0.953737	1.73221	2.83896	2.13677	1.95647	2.42547	2.4615	2.29417	2.20488	2.46617	2.42767	1.9493	1.94561	2.15554	1.93565	2.21384	2.15747	1.96298	2.01002	2.16935	2.28275	2.15206	2.02871
chr13:8971723-8995258	Gtpbp4	1.95996	1.99189	2.02341	2.02291	2.01107	2.10224	2.00704	1.96994	1.95745	1.93055	1.9608	1.93275	2.8832	1.93151	2.03444	1.94844	1.95505	1.97375	1.96459	1.98898	2.07683	1.99964	1.97518	2.059	2.07705	2.01555	1.99747	2.0278
chr7:110915790-110920108	Olfr69	1.97198	2.0584	2.07428	1.88372	2.14618	2.03864	1.91086	1.86275	1.97718	1.97939	2.05356	2.31369	1.97337	2.05971	1.86815	2.03451	2.15178	2.113	2.05031	2.0837	1.99169	2.03578	1.95985	2.04699	2.051	2.03294	2.0143	2.02732
chr1:135223788-135226299	Kiss1	1.89315	1.67361	2.15212	1.81342	1.96765	2.09993	2.03009	1.87546	1.88005	2.03789	2.05444	2.0608	1.9345	2.0551	2.03341	2.00732	2.02713	2.08103	1.85096	2.06092	2.93847	2.1817	2.10852	1.69263	2.02028	2.03252	2.16497	2.02697
chr7:110961037-110962417	Hbb-b2	2.32378	1.99926	2.15749	2.07292	2.23813	2.27504	2.09485	2.08132	1.89342	2.24336	2.18169	2.03701	1.99824	1.87497	1.59018	2.01647	2.28157	2.16503	2.14595	2.18727	1.90793	2.11355	1.96065	2.13213	1.57688	1.7876	1.36864	2.02612
chr2:85270039-85270984	Olfr994	2.24829	2.32047	2.29355	1.69628	1.87161	1.86186	1.93068	2.07075	2.24606	2.03823	1.16596	1.85422	1.76308	2.24349	2.00246	2.36027	2.36772	2.10015	1.72311	1.94798	2.15703	1.98836	2.15079	1.96271	2.13624	2.06612	2.13048	2.02585
chr7:110961041-110962437	Hbb-b1	2.32309	1.99162	2.15469	2.07382	2.23674	2.27764	2.09528	2.0819	1.88976	2.23976	2.18502	2.03299	1.99904	1.88572	1.60348	2.01134	2.27583	2.15981	2.15456	2.1879	1.9025	2.10601	1.95032	2.12962	1.58049	1.78417	1.37094	2.02533
chr7:24737405-24738375	Vmn1r180	1.74534	1.58115	2.22541	1.72206	2.26865	1.90473	2.08435	1.97033	2.46177	1.94308	2.26642	2.23632	1.97991	2.85484	1.96427	1.96765	2.47983	1.7142	2.03496	1.67799	1.94119	1.84586	1.96713	1.92882	2.00983	2.42223	1.47607	2.02498
chr2:37075010-37075940	Olfr366	2.18277	2.24251	1.83199	1.82295	2.07954	1.74235	2.53787	2.29146	2.08312	1.58257	2.30627	2.15997	1.72814	2.23692	1.72293	0.873039	1.93009	2.0991	2.20677	2.03207	1.73471	2.08221	1.95839	2.3446	2.1543	2.326	2.36924	2.02451
chr16:10835151-10843328	Rmi2	1.90015	1.98806	1.93827	2.08961	1.85676	2.25355	1.87368	1.84594	3.03446	1.94336	2.00746	1.8271	1.84678	2.77903	2.05073	1.97587	1.99628	2.01622	1.89517	1.9741	2.02709	2.02773	1.80534	1.82217	2.01318	1.9738	1.8989	2.02447
chr9:88583442-88614636	Gm2382	2.2638	2.22202	1.99224	2.0774	1.83299	2.55168	2.00022	2.3872	2.66879	2.39797	2.35123	2.0284	2.30346	3.16133	1.97536	1.16963	1.71622	1.92379	0.346565	1.8731	2.0614	1.74652	1.88777	1.72135	1.99159	1.87775	2.1174	2.02397
chr7:110902663-110905864	Olfr630	2.13117	1.97845	2.1512	1.99794	2.06439	2.03436	2.11977	2.06591	2.00228	1.99325	2.014	2.02804	2.07884	2.04675	1.97241	1.96649	1.94793	2.15326	2.16188	2.11247	1.9414	2.00857	2.11193	2.12255	1.70715	1.80179	1.8844	2.02217
chr6:113574014-113581627	Vhl	2.03974	2.18145	2.09883	2.01691	1.87871	2.32248	2.009	2.95159	2.09319	1.91161	1.98825	1.95529	1.86419	1.751	2.09781	1.93664	2.03367	1.98211	1.97695	2.0375	2.00861	1.99498	1.99439	1.89451	1.82632	1.95385	1.78896	2.0218
chr10:112362483-112366082	Atxn7l3b	3.69375	1.87304	1.83815	2.00461	2.01116	3.20097	2.66717	1.8722	1.96585	1.79397	1.92751	1.99305	1.81463	1.51596	1.8056	1.62596	1.94264	1.88876	1.87759	1.86455	1.83766	1.96876	1.83228	1.95576	2.02502	1.90394	1.86015	2.02077
chr14:45336841-45344662	Gm8267	1.58747	1.74037	2.08259	1.38073	0.92152	2.18664	1.55788	1.84368	2.24965	0.776464	2.14734	2.35394	1.68045	3.25206	3.49948	2.04496	2.1492	2.05775	2.09452	2.3667	2.06207	2.1188	2.26302	2.2051	2.1819	1.96582	1.76287	2.01974
chr13:22648069-22648978	Vmn1r204	1.89718	1.67804	2.05239	1.09461	2.20405	1.80185	2.27804	2.16449	2.02555	2.33748	1.83761	2.38683	1.69669	2.36565	2.24602	2.42817	1.88664	2.22528	2.0079	1.79465	1.84053	2.34233	2.0162	2.02816	1.99238	1.80261	2.08942	2.01929
chr2:86253265-86254207	Olfr1061	3.15734	2.11445	2.30722	2.08426	2.11363	1.85054	1.79246	2.29342	2.1114	2.3945	1.32651	0.953221	2.29151	2.0354	2.02681	1.20663	2.24255	1.79457	2.27705	2.26275	2.13558	1.9628	1.40087	1.89546	2.76498	1.82209	1.87829	2.01838
chr12:18521315-18542060	5730507C01Rik	0.621643	1.48934	1.38928	0.624746	0.727083	1.39644	0.668543	2.24718	2.52595	3.23736	2.54967	2.84823	4.04701	3.01368	3.19649	2.7842	1.51495	1.45913	0.691621	6.79755	0.607707	2.28823	0.675059	2.24034	1.28075	1.30944	2.26452	2.01838
chr9:37800076-37801024	Olfr881	1.85697	2.26826	1.03878	1.82641	1.77502	1.84133	2.07241	2.257	2.23139	2.62582	1.93389	2.13129	1.97552	2.20528	2.21642	1.85782	1.77284	2.41845	1.76739	1.91989	2.08635	1.54685	2.25202	2.07964	2.16659	2.12904	2.22654	2.01775
chr17:38267193-38268135	Olfr132	2.17197	2.34842	2.16768	1.89616	1.2322	1.01686	2.04322	1.09996	1.92787	2.05159	2.1754	2.46646	2.31088	2.44179	2.12262	2.3328	2.02719	2.10029	1.21525	2.43579	2.33483	2.09842	2.1381	2.19082	1.65926	1.88128	2.58325	2.01742
chr12:82829398-82882157	Map3k9	2.91135	1.9478	1.94236	1.895	1.91452	1.93805	1.93823	2.00578	2.0169	2.01626	1.97023	1.96082	1.96093	2.01563	1.98297	2.0134	1.9254	1.99512	1.9876	1.97687	1.94501	2.01227	2.02926	1.97753	2.05053	1.98925	2.0496	2.01365
chr7:50432957-50447479	Zfp936	1.96708	1.91584	1.98021	2.10838	2.0265	1.98145	2.04752	2.09672	1.24346	2.16935	1.97184	1.89424	1.07828	2.40156	1.77965	2.00854	2.01023	3.0087	2.12324	1.95707	2.03859	2.10714	2.05258	2.11391	2.06408	2.0646	2.14898	2.01332
chr7:14318854-14364986	Sult2a2	2.00029	2.01327	1.99324	2.04679	2.152	1.96287	2.00142	1.98821	2.02259	2.05463	1.85658	1.83684	1.97473	2.44356	2.12652	2.02469	2.1289	2.1456	2.08269	2.0506	2.20043	0.608078	1.98825	2.125	2.11214	2.15433	2.26019	2.01313
chr9:109381088-109398368	Fbxw19	1.99266	1.98714	2.82521	1.96665	2.00947	1.80837	2.0343	2.0424	1.90905	2.02146	1.96469	1.93182	1.88785	2.23855	2.02838	1.94343	2.03714	1.87217	1.99158	1.99356	2.05537	2.05533	1.6685	2.04178	1.92174	2.0159	2.06268	2.01138
chr10:121885554-121890509	Avpr1a	3.07615	1.95803	1.99071	2.16296	1.81023	2.08346	1.89126	1.88583	1.96013	1.88221	2.04189	2.11505	1.90424	1.92973	2.11447	1.87425	1.96903	1.86858	1.95387	2.05594	1.87027	2.09425	1.92484	1.90971	1.84328	2.04879	2.06134	2.01039
chr17:53863075-53865058	4932415M13Rik	1.73059	2.0586	2.1134	1.85172	1.58865	1.76716	1.65376	1.98786	1.85206	3.11026	1.83034	2.53783	3.10258	2.59853	2.24265	0.954793	2.06517	1.91545	2.21438	2.07065	1.87789	1.99447	1.75314	1.88571	1.6711	1.76866	2.06582	2.00975
chr13:5860734-5869639	Klf6	1.95303	1.96459	1.98392	1.97648	1.81881	2.27336	1.91004	1.88848	2.20361	1.9177	2.0136	1.97918	2.06401	1.67023	2.08746	1.98662	1.95034	2.11354	1.88338	1.93884	1.92803	1.95608	2.96055	2.05951	2.01823	1.88971	1.87013	2.00961
chr9:109334831-109351654	Fbxw16	2.09595	1.90321	1.94397	2.07954	2.22266	1.82158	2.09172	1.83058	1.89862	2.11881	1.91756	1.97834	1.98611	2.35561	2.05575	1.75865	2.06333	1.80253	2.17945	1.83549	2.05822	1.79338	1.93896	2.08973	2.16432	2.1802	2.09216	2.0095
chr5:109644520-109653641	Vmn2r14	2.05586	1.98949	2.04062	1.96601	1.97369	1.88681	2.07842	2.01267	2.0479	2.12389	1.08011	2.10893	2.42597	2.28144	2.15798	2.06699	1.98655	2.0736	2.07843	2.03061	2.08415	2.10187	1.92519	1.99351	1.85889	1.77156	2.05008	2.0093
chr4:88400771-88401320	Gm13271	3.5519	1.40019	3.0226	2.27019	1.90193	3.89442	2.74708	1.77446	1.7456	1.79102	0.317699	1.27963	2.34919	1.42384	0.873442	1.44216	4.57254	2.25533	1.78289	1.35934	3.81456	3.17616	0.978481	1.17066	1.02578	1.20239	1.11905	2.00898
chr7:117189877-117190061	Snora23	2.13359	2.12071	1.97208	1.75489	1.78673	1.81751	1.68088	2.40771	2.10171	3.24992	2.00999	1.63831	1.78439	2.06443	2.15425	2.48332	1.76027	1.57865	1.8553	1.79248	2.1179	1.74461	2.20731	2.26494	1.66072	1.80984	2.28184	2.00868
chr7:26682682-26711643	Cyp2b10	1.95032	1.93607	1.93412	2.00592	1.95265	2.01609	2.02773	1.97159	1.97976	2.00106	1.99861	1.94363	2.83947	1.97495	2.0032	1.93679	1.85508	1.94999	2.02196	1.9667	1.94414	2.03533	2.01162	1.93237	1.98262	2.0273	1.99827	2.00731
chr4:86232356-86232474	Scarna8	1.9226	2.01131	2.19829	2.087	1.85648	2.5612	2.09932	2.02484	1.93829	2.04151	1.63306	2.0513	1.79674	1.74515	1.7304	1.41677	3.97251	2.11525	1.63444	1.45645	1.69891	1.91808	2.05182	1.68797	2.43251	2.0493	2.01712	2.0055
chr7:110698881-110704018	Olfr613	2.07805	2.05162	2.24941	2.0925	2.0456	1.93728	2.36712	1.75444	2.02823	1.93785	2.14945	2.26213	1.96114	2.23333	2.07652	2.07275	1.8012	2.05011	2.05607	2.06224	2.32522	1.85258	2.39157	1.99841	1.5539	1.31134	1.44159	2.00525
chr11:101115056-101120860	Vps25	1.99972	2.02899	1.90372	1.76758	1.78991	3.37959	1.93553	2.1133	2.05796	2.18518	1.88939	1.95724	2.07272	2.03315	2.38107	1.92647	1.85912	1.98996	1.98035	1.90535	1.85611	1.99662	1.89335	1.92498	1.8119	1.61748	1.84769	2.00387
chr8:36528318-36558587	Eri1	2.01766	2.03179	2.07985	2.03007	2.0804	1.27046	2.07605	2.05771	2.10215	2.03999	2.10182	2.02956	2.16044	2.07973	2.16458	2.07507	2.0068	2.01838	1.99437	2.02554	1.99648	1.99373	1.98758	2.08267	1.82946	1.90379	1.85428	2.00335
chrX:151461743-151467835	Magea2	2.33841	2.24891	2.19445	2.26859	2.30939	2.12856	2.26777	2.22758	1.79468	1.61866	1.96029	2.26385	1.04723	1.75865	1.8968	1.67215	2.25742	1.25488	1.74205	2.41594	1.63205	2.51486	1.78606	2.28533	2.54697	1.26227	2.38186	2.0028
chr8:22389440-22390140	Gm15292	4.00206	2.42047	3.6519	2.86185	0.144054	2.74786	3.82499	4.26679	0.067051	2.33724	2.00943	0.964844	0.73832	2.46907	2.59282	0.949663	2.465	1.18593	2.27938	2.4982	1.02639	2.3468	3.364	1.63132	0	0	1.2292	2.00276
chr7:11486088-11490399	Zscan4b	1.10577	2.28433	1.6684	1.48739	2.32772	1.24709	1.4689	2.24096	2.46014	2.95159	1.76137	2.07254	3.23291	3.53314	3.27845	1.1939	1.35803	1.83476	1.32543	1.45966	1.70818	2.1168	1.06591	2.5706	1.99108	2.22782	2.06705	2.00148
chr2:87586317-87587337	Olfr1140	2.13703	1.93423	2.09072	1.95659	1.89374	2.2456	1.92016	1.71697	1.69727	2.04483	2.05591	2.11009	2.00039	1.9562	1.6936	2.11568	1.88035	1.89062	2.2189	1.74392	2.10318	1.796	2.06588	2.01216	2.17334	2.16941	2.35571	1.9992
chr7:147362002-147362956	Olfr523	1.7791	1.6001	2.19594	1.90204	1.99648	1.7542	1.84746	1.73504	2.05476	2.27282	2.10084	2.08549	1.75069	2.51527	1.73479	2.91573	1.89981	1.88979	2.11554	1.77771	2.10678	2.05041	1.70141	1.79832	2.16263	1.83475	2.37867	1.99839
chr13:120251565-120274924	4833420G17Rik	1.90156	2.0244	2.04466	1.97801	1.89274	2.16048	1.99233	1.93789	2.04841	2.02744	1.89812	1.91016	2.79043	1.87856	1.95002	2.02472	1.98708	2.06591	1.8892	1.9934	1.84595	1.86698	1.91972	1.93177	2.03726	1.98918	1.96058	1.99804
chr12:85291557-85293903	2410016O06Rik	2.23533	1.92739	1.98807	2.04007	1.943	2.06748	1.89266	2.05119	2.01304	1.84654	1.9834	1.9188	1.87536	1.94791	2.0247	2.80951	1.92132	1.89502	1.67025	1.61231	2.03565	1.86679	1.711	2.11741	2.24206	1.92198	2.38521	1.99791
chr7:111618528-111656363	Trim30d	2.10721	2.07875	2.06962	2.07915	2.1287	2.04313	2.1138	2.05131	2.08349	2.09626	2.14907	2.16512	2.09049	2.44504	2.32901	2.19701	1.49635	2.23492	2.13238	1.87143	2.05739	1.83244	1.81694	2.18847	1.34032	1.40641	1.3298	1.99756
chr15:77414587-77426555	Apol10b	2.03246	1.95951	1.93022	2.04376	1.91905	1.82015	1.99599	1.99364	2.09711	2.0727	2.0337	1.92914	2.14513	1.14973	2.14699	2.05302	2.04588	2.01565	1.96654	2.0322	2.02826	2.02756	1.99732	2.02215	2.18489	2.14616	2.13702	1.99726
chrX:30245481-30247441	Gm10921	1.74341	1.31802	1.77677	1.51575	1.90747	2.87844	1.90357	2.00386	2.36131	2.3745	3.67084	2.23052	3.34709	2.51873	4.71582	2.3346	1.27151	0.906428	1.6704	1.28739	0.871201	1.29707	1.10061	1.06754	2.06296	1.22481	2.5549	1.99687
chr2:120963027-120966434	Lcmt2	1.94847	2.07142	2.06567	1.8039	1.94554	2.1758	1.79288	1.79714	1.9517	1.9485	1.91521	1.83561	2.06973	1.93556	2.05698	2.03867	2.06753	1.80936	1.8472	1.98685	2.95495	1.9666	1.88854	1.98792	1.99682	1.99797	1.98599	1.99417
chr9:37950721-37951666	Olfr890	2.43771	2.13177	1.91676	2.05784	1.80917	2.08839	2.28608	2.01169	2.19407	2.07691	2.58103	2.14449	2.41383	2.28829	2.07543	2.0468	2.09316	2.01511	2.38337	1.92236	2.09936	1.82593	1.05981	2.16061	1.34859	0.101042	2.2692	1.99403
chr17:7159313-7165505	Tagap1	2.28808	2.26583	2.37036	1.30963	2.44098	1.95553	1.85622	2.08329	1.97893	1.33795	2.06999	1.78982	1.79599	1.76252	1.73443	2.21264	3.11483	2.15274	2.41475	3.24224	1.85294	1.44327	2.30887	2.21239	1.65641	1.08737	1.07679	1.99314
chr7:26846513-26881215	Cyp2b13	2.05448	1.12557	2.01408	2.05124	2.14974	2.0422	2.10448	2.1285	2.10008	1.13912	2.08466	2.12459	2.02983	1.26389	2.20125	2.09567	2.08592	2.13322	2.12566	2.04337	2.08238	2.08297	2.07853	2.06643	2.09017	2.08555	2.21065	1.99238
chr6:132519859-132522419	Prh1	1.69926	1.7544	1.95419	1.91377	1.92861	1.79258	1.11582	0.918511	3.9102	1.63682	2.0511	2.11555	1.93032	4.05276	1.83392	2.81139	1.96429	1.81302	2.01644	1.7144	1.94871	1.89641	1.95612	1.8773	1.76941	1.77185	1.642	1.99219
chr7:11379589-11384414	Zscan4a	0.885788	1.09548	1.17862	2.02644	0.968684	1.85985	1.86141	2.13536	2.68476	2.65085	2.30093	2.7345	2.82298	3.46313	3.1317	2.08618	1.55123	1.44104	1.49732	1.6742	1.90875	1.93484	1.61124	2.17714	1.97468	2.03526	2.06939	1.99118
chr12:24728066-24782134	9030624G23Rik	1.80342	1.19937	1.08351	1.76369	2.74532	1.1748	2.61234	0.521921	1.51859	2.26942	2.88599	3.87672	2.40374	2.48116	2.58181	2.4943	3.2939	2.43208	3.5459	1.19327	3.3357	0.491655	3.13744	0.502663	0.979398	0.98163	0.443178	1.99085
chr11:101280127-101286647	Ptges3l	2.0249	1.98325	2.04886	2.05949	1.80002	3.44161	2.08506	1.8797	2.10776	1.90703	1.97631	1.71074	1.87501	1.80761	2.24769	1.83267	1.91134	1.86635	1.98442	2.03363	1.84606	1.89675	1.81938	1.85051	1.92727	1.96203	1.82713	1.98935
chr12:85328810-85334825	Acot2	1.9456	1.9317	1.97231	1.91809	1.93577	2.14211	2.08443	1.83301	1.94819	1.87511	1.86034	2.01585	2.08092	1.84725	1.95855	2.68316	2.04322	2.02757	1.94283	1.97795	1.85894	1.94113	1.85009	1.89446	2.111	1.83144	2.19834	1.98924
chr19:12964138-12965065	Olfr1446	1.76971	2.47855	1.93568	2.16983	2.15342	2.06789	2.34213	2.22179	1.46403	2.08758	1.18185	1.00565	1.3026	1.4022	1.99827	0.804342	2.44612	2.34158	2.22758	2.08856	2.03547	2.38074	2.32256	2.27566	2.72449	2.25484	2.1749	1.98733
chr11:99676289-99676980	Gm11564	2.22237	2.10961	1.74888	1.23492	1.82531	1.05717	1.99979	2.67387	1.62793	2.19135	1.97218	1.89128	1.95818	1.98117	1.8613	2.18466	2.00445	2.05826	2.42993	2.07533	2.13206	2.07151	2.02806	1.82063	2.27504	1.93747	2.20636	1.98441
chr15:79908210-79913836	Rpl3	1.83161	2.06868	1.91127	1.9642	1.65979	2.3632	2.06027	1.9843	2.3057	2.16842	2.14465	1.77185	2.18588	2.08029	2.29354	2.09294	1.84611	2.25902	1.9788	2.1585	1.96122	2.03532	2.03657	2.09524	1.35019	1.52473	1.44411	1.98431
chr2:87742898-87743831	Olfr1154	1.83264	1.866	2.15807	2.08477	1.882	2.22595	1.82481	2.17964	2.36588	1.76986	2.0843	2.18023	1.18494	2.21892	1.69215	1.97479	1.63353	2.1287	2.05828	1.79805	2.03999	1.77614	1.90774	2.28933	2.16763	2.2114	2.03956	1.98427
chr6:132261607-132264761	Prpmp5	1.8313	1.95591	1.70321	2.07114	2.155	1.80055	2.01068	1.89915	2.09823	0.993651	2.21604	2.10648	1.9588	2.25635	3.01125	2.01482	1.90902	1.99383	2.19815	1.94032	2.01831	1.91645	1.68042	1.78752	2.1421	1.9096	1.97524	1.98346
chr11:73797163-73798108	Olfr398	2.0537	1.88679	2.08016	2.04566	2.01591	1.73825	2.00907	1.92759	1.84438	2.03552	1.81792	1.96977	0.981295	2.04941	2.27997	1.91267	2.16981	2.19539	2.03633	1.56249	2.16439	1.94228	1.77789	2.06319	2.3421	2.76368	1.88268	1.98327
chr6:133714016-133717421	Gm5886	2.2438	2.0251	2.18062	2.1408	1.97446	1.90804	2.25166	2.29373	1.02785	1.11052	2.42659	2.12153	2.10865	1.12773	2.14484	1.16086	2.20225	2.46042	2.04777	2.01187	2.19316	1.98021	2.10145	2.05834	1.96199	1.99906	2.26366	1.98248
chr13:5854754-5857338	1700016G22Rik	1.80691	2.01953	1.84325	1.94074	2.03728	2.17288	2.15295	1.75726	2.0199	2.02479	1.99067	1.8593	2.07799	1.64972	2.19743	1.88864	2.09052	1.83855	1.80828	1.87015	1.98278	2.14241	2.96171	2.03102	1.77036	1.84855	1.70397	1.98102
chr10:129454418-129455357	Olfr820	2.31522	1.85532	1.98086	2.26455	1.90925	1.74205	2.01931	2.18134	2.05204	1.74286	1.94109	2.48856	2.146	2.05211	1.99635	2.10219	0	2.36898	1.8434	2.4359	2.09735	2.19065	2.09146	1.99355	2.09641	1.86385	1.7133	1.98089
chr17:37932390-37933320	Olfr123	2.17953	2.26201	2.09529	2.35889	1.50932	1.1475	1.95847	1.25223	1.87014	2.26309	2.09361	2.42446	2.19206	2.24305	1.96834	2.01761	2.14236	2.31954	1.36169	2.30433	1.70974	1.89767	2.29631	1.69311	2.07341	1.865	1.9638	1.98009
chr17:19910326-19949500	Vmn2r103	2.03884	2.05842	2.09485	2.00296	2.10703	1.95003	2.09475	2.10501	2.04656	2.05878	2.12942	2.19837	2.10257	2.36135	2.18602	2.07789	2.01519	2.0854	2.09568	1.02546	1.04663	2.05547	1.06509	2.09032	2.05063	2.19508	2.12053	1.97994
chr9:88618125-88626688	Bcl2a1d	2.3595	2.06956	2.09244	2.09399	1.81968	2.13323	2.11758	2.19322	2.3636	2.20338	2.33305	1.95695	2.20151	2.89687	1.97082	0.944482	1.82981	1.90599	0.237932	1.89382	1.92468	1.87886	2.02071	1.84719	2.12317	2.04848	1.96803	1.97883
chr17:38285534-38286473	Olfr133	2.14781	2.49743	2.06275	1.5707	0.927453	0.944963	2.448	0.992866	1.79924	2.2876	2.27718	2.0684	2.27019	2.17468	1.97728	2.26816	2.10071	2.43763	1.26305	1.8129	2.21285	2.22595	1.80413	2.07808	2.37084	2.2126	2.19295	1.97876
chr16:59097891-59098816	Olfr192	1.78751	2.26035	2.05127	1.85741	2.085	1.65554	2.1776	1.83863	1.30879	1.80208	2.17176	2.20847	2.09841	1.03211	1.82662	2.13078	1.87832	2.43165	2.20225	2.41016	1.74586	1.83841	2.13063	2.14332	2.25729	1.82563	2.25152	1.97805
chr7:19303438-19312597	Psg22	2.02151	1.1327	0.974721	2.28561	2.19097	0.923657	2.2742	3.01472	2.02919	2.12913	1.69673	2.05651	1.97157	1.82055	1.7806	2.1674	1.97646	1.9972	2.08818	2.04123	1.91684	2.17324	2.02395	2.10635	2.20566	2.2055	2.17359	1.97696
chr11:82930346-82936161	Slfn1	1.82825	1.95102	1.88853	2.04291	2.03765	1.88824	2.00896	2.01192	2.06482	1.99461	1.87206	2.02409	1.92135	2.23129	2.16925	2.02434	2.08586	1.91076	1.93231	2.12065	2.05059	2.07423	2.05546	2.10772	1.61645	1.63768	1.79035	1.97561
chr4:61808865-61811875	Mup21	2.15854	2.03156	2.10646	1.93545	2.00101	1.84905	1.7469	2.20088	1.82827	1.82267	1.85124	1.86096	1.85497	2.14154	2.02472	1.90856	1.96417	2.038	1.93279	1.93954	2.043	1.95238	2.02886	1.97259	1.90644	2.15159	2.07541	1.97509
chr1:135206399-135219603	Golt1a	1.9489	1.90742	1.91053	1.93335	1.91057	2.09578	1.87799	1.95525	1.98477	1.9411	2.01492	1.84539	1.95254	1.89011	1.9512	1.96721	1.93565	1.93357	1.96096	1.96918	2.86546	1.88293	1.86184	1.93716	1.9871	1.92325	1.98288	1.97507
chr5:11340407-11346273	Speer1-ps1	1.93632	1.27271	1.92243	1.67987	1.34848	2.02208	1.44244	2.20797	1.90558	2.53759	2.04355	1.57142	3.54712	2.69054	2.13519	2.95978	1.87376	1.53707	1.82895	1.3411	1.10927	0.921606	2.03053	1.9372	2.83239	2.6723	2.01523	1.97491
chr7:110686774-110687746	Olfr612	2.38794	1.32109	2.25002	1.47235	2.36946	1.51325	2.31843	2.45341	1.67355	1.48159	2.35649	2.02847	0.6854	1.61528	1.61124	1.2802	1.79408	1.3223	2.20394	2.30509	2.40895	1.47028	2.50047	2.74144	2.30696	2.73012	2.71038	1.97453
chrX:30823249-30824027	LOC100862314	1.88433	1.21241	2.46681	1.25173	2.05724	3.769	2.85708	2.68389	0.828876	0.848995	2.50602	0.70748	0.884052	2.82505	2.83396	1.79996	1.27657	1.51326	0.241969	2.11453	1.78566	1.84959	1.15257	1.64259	3.81836	2.2521	4.23637	1.97409
chr7:33226559-33227863	Scgb1b29	0.952161	2.51881	2.54906	2.66226	3.32918	1.68027	2.14736	2.2749	2.34232	2.43175	1.34315	1.54958	5.12047	3.50746	0.936412	1.94936	2.38263	1.73146	1.10028	3.23529	2.45967	1.1031	0.580878	0.989851	0.38406	1.26583	0.771265	1.97403
chr15:79719961-79723568	D730005E14Rik	2.01764	1.99466	2.04217	2.01027	1.74068	2.2427	2.00813	1.98655	2.04401	2.07127	2.06768	2.0022	1.95088	1.98875	2.28953	1.84561	1.90596	2.07964	1.98989	2.0765	2.03617	2.01196	2.12493	1.80923	1.57532	1.72119	1.65772	1.97375
chr11:101286398-101296979	Rundc1	2.14229	2.13889	1.91658	2.07812	1.96587	3.27786	1.93832	2.02855	1.79965	1.83989	1.73775	1.69039	1.87443	1.80089	1.9331	1.78185	1.9206	1.95125	1.93764	2.00011	1.92676	2.04138	1.94287	1.70455	1.91167	1.88529	2.09378	1.9726
chr14:10716608-10719382	Gm3833	1.832	2.02782	2.22118	2.1678	2.20394	2.22454	2.23595	2.03064	1.36463	2.30341	2.05053	1.16774	1.94635	1.98884	1.83675	2.24949	1.85044	2.11384	1.80635	1.80644	1.80437	1.8254	2.02686	1.96012	2.01535	1.93437	2.25687	1.9723
chr7:25453030-25457069	Tex101	1.84148	1.97708	1.96655	2.13401	2.01192	1.94053	1.96713	1.94529	2.06419	2.08985	2.05932	1.92086	2.11556	2.16689	2.05606	2.02452	1.92741	1.8282	1.96397	1.8329	1.83194	1.97755	1.97187	1.99614	1.67014	1.97059	1.95662	1.97069
chr13:33284827-33295849	Serpinb9d	1.81661	1.84866	1.74175	1.85854	1.7851	1.86977	1.85003	1.8113	1.94146	2.15329	2.06373	2.08464	2.14365	3.14627	2.10525	1.91583	1.85245	1.97733	1.89022	2.07845	1.96709	1.87004	2.05441	1.90027	1.76145	1.81284	1.88468	1.96982
chr13:21902335-21902728	Hist1h2ap	1.9673	2.40151	2.0915	1.95246	1.93971	2.61469	1.7565	2.49128	1.68571	2.32831	1.85212	1.68214	1.90612	1.94188	2.81621	2.12772	1.7265	1.93309	1.56522	2.11301	1.84661	2.1149	1.18884	1.53652	1.98363	1.63704	1.9706	1.9693
chr9:39801396-39802332	Olfr978	1.68221	1.81686	2.17479	1.10397	2.19068	1.0799	2.55161	2.11483	1.81323	2.15737	2.44055	2.79778	1.85402	1.90729	2.0197	1.83087	1.68178	2.04918	2.14788	2.13097	2.12101	2.45595	1.38542	2.4	1.82565	1.26431	2.11085	1.96699
chr1:84903279-84931658	Slc16a14	1.87852	1.97453	1.90208	1.98073	1.99055	1.94234	1.96076	2.00332	1.88653	1.95823	2.72504	1.94849	1.88867	1.90763	1.9738	1.92193	1.92886	1.93176	1.86911	1.97643	1.88623	1.95912	1.93844	1.87232	2.06518	1.93763	1.89381	1.96674
chr5:116858503-116872873	Hspb8	1.86552	1.98825	2.03597	1.96559	1.77103	2.21724	1.9622	1.9188	1.95909	1.84967	1.89521	1.81461	1.96509	1.85964	1.90119	1.97388	1.9619	1.95649	1.8566	1.90366	2.88457	1.90871	1.92942	1.89351	1.96993	1.89089	1.97164	1.96557
chr1:84836415-84897061	Fbxo36	1.88813	1.96486	1.91259	1.97286	1.90636	2.09846	1.94528	1.93618	1.92002	1.95547	2.81653	1.90411	1.87267	1.93637	1.94668	1.96811	1.90612	1.95294	1.8852	1.91704	1.91969	1.91144	1.90202	1.91231	1.93992	1.98112	1.89691	1.96553
chr2:111219158-111220094	Olfr1284	2.14468	2.13827	1.11689	1.25022	1.14231	2.05533	0.0362655	2.36939	2.21788	1.97186	2.25043	2.33796	2.08439	2.33477	2.08494	1.92698	2.05214	2.15116	2.34277	2.11811	2.33333	1.8127	2.24829	2.36101	2.29665	2.14856	1.69496	1.96379
chr15:31531870-31547290	Fam173b	1.8991	1.93326	1.99422	1.95796	1.8527	2.01208	1.7787	1.89621	1.89073	1.66693	1.9392	1.85231	2.92545	1.75179	1.894	1.98942	1.98272	1.95504	1.94836	1.89123	1.94971	1.96986	1.919	1.91937	2.06378	2.05706	2.0973	1.9625
chr13:21902235-21902749	Hist1h2ao	1.93225	2.39477	2.12075	1.93701	1.81403	2.50775	1.7444	2.3572	1.73297	2.19023	1.81042	1.73203	1.94965	1.89001	2.80409	2.14051	1.76701	1.98818	1.60689	2.09111	1.93248	2.11174	1.28491	1.63642	1.97775	1.62016	1.91211	1.96248
chr7:11891726-11896031	Zscan4e	1.16161	1.95167	1.34022	1.52657	2.03332	1.86299	1.78278	2.13228	2.27993	1.78165	2.59606	2.57132	2.80365	2.96766	3.14103	2.03112	0.865982	1.43095	0.994236	1.04818	1.75887	2.32042	1.35469	2.34838	2.34631	2.10889	2.43331	1.962
chr2:111911802-111912738	Olfr1313	2.34481	2.00665	1.90257	2.04931	2.18105	1.7311	2.22244	2.01892	2.13526	1.88955	2.19669	2.04553	1.93512	2.31844	1.71402	1.95135	2.24438	2.08548	1.1403	1.88007	2.21945	1.82037	2.04852	1.05397	1.61942	1.80633	2.37775	1.9607
chr7:110935725-110940344	Olfr67	2.18925	2.09647	2.17403	2.14113	2.14043	2.12419	2.04917	2.02499	1.91197	2.07865	1.70442	1.86792	2.23653	1.86457	1.7733	1.83014	2.02423	2.10481	2.08266	2.13158	2.17497	1.91913	2.076	2.22134	1.23438	1.41916	1.31708	1.95972
chr16:84371387-84375750	4930553E22Rik	2.05018	2.01675	1.95298	2.0575	2.01636	1.86171	1.89945	2.16541	1.9311	1.95318	1.94815	2.06501	1.91892	2.09875	2.01145	2.0875	1.94549	1.84792	1.94779	1.77233	1.89997	1.9253	1.85307	1.9288	1.9981	1.93688	1.77184	1.95785
chr12:9036802-9043200	Ttc32	3.94555	1.78549	1.93545	1.87009	2.06778	2.14786	1.95947	1.77318	2.07861	1.85038	1.81211	1.98394	2.01565	1.65815	1.93575	1.85741	1.95911	1.9828	1.71837	1.83984	1.87016	1.96065	2.0774	1.98545	1.56408	1.47066	1.74886	1.95756
chr4:73062065-73066106	Gm11487	2.01978	1.55265	1.89345	1.85196	1.51592	1.77655	1.54074	2.28529	1.67272	1.96285	1.89499	1.8079	1.98218	1.89915	1.63622	1.72391	2.06561	2.1349	2.21527	2.24173	2.09228	1.81692	1.87274	2.19557	2.38004	2.24692	2.56706	1.95723
chr17:18718690-18735121	Vmn2r96	2.20804	2.04243	1.98193	2.1339	1.52886	1.43854	2.10964	1.44941	2.03202	1.94805	2.03676	2.13839	2.07115	2.25358	2.25428	1.79387	2.09606	1.93902	1.52123	2.07892	2.07025	1.5565	1.8285	2.03479	2.13998	2.0392	2.0886	1.95607
chr4:60079340-60152730	Mup15	1.32011	1.5954	0.970619	1.40326	1.31186	2.00798	1.32503	1.73841	1.47772	1.74086	1.34568	1.77977	0.570238	1.04026	1.24557	0.853437	2.93386	3.85469	5.01544	0.678742	2.5698	1.79668	4.79716	1.78433	2.52458	2.5021	2.59238	1.95467
chr2:150912521-150918086	Gm14151	2.25724	1.14388	1.08476	2.19862	2.19272	2.11917	1.07112	1.11993	1.60937	2.2767	2.25238	1.79293	2.1906	2.53007	2.28648	2.29989	2.07192	2.06108	2.11407	2.01046	2.0307	2.11084	1.59535	2.22728	1.92395	2.11764	2.08227	1.9545
chr17:35561791-35565306	H2-Q8	1.49844	1.09502	2.19859	4.11695	0.470093	0.412699	3.38043	0.377266	0.898317	1.77044	1.41314	1.06088	1.01913	1.07987	2.94238	1.44772	2.30326	2.89369	2.59946	1.63502	2.50524	1.58384	3.10821	5.27272	1.8345	1.89365	1.94475	1.95392
chr6:66502176-66509702	Vmn1r32	2.13067	1.98513	2.03245	2.16052	2.08872	1.93308	2.01535	2.11536	2.03675	2.03547	1.05693	2.10319	2.00947	2.11108	1.02573	2.15991	1.94644	2.02207	1.97023	1.97359	1.95958	2.00132	2.02011	2.03408	1.93925	1.83408	2.03195	1.95306
chr11:101268153-101278747	Aarsd1	1.84267	1.89528	1.91623	1.92055	1.82029	3.22426	1.85682	1.97627	1.93567	1.96577	1.79392	1.72685	1.90125	2.03227	2.09469	1.92964	1.94877	1.90733	1.89309	1.88787	1.88909	1.96357	1.95057	1.81624	1.7922	1.89965	1.936	1.95247
chrX:10876446-10876764	Gm14475	2.0225	1.88222	2.1215	1.31724	1.0932	1.15192	1.73427	1.8333	2.44436	0.879993	1.32359	2.61484	1.04549	1.02148	1.28544	1.47916	2.8333	2.30372	2.36363	1.96361	3.0588	2.8575	4.14243	2.53367	1.43343	0.433816	3.48333	1.95029
chr10:78074413-78080819	Olfr1357	1.9829	1.90249	1.98007	1.65034	1.64168	1.92389	1.97709	2.07757	2.12551	1.48714	2.10542	2.03552	2.10332	2.13231	1.91009	1.10902	2.00725	1.97995	2.12602	1.98515	2.12974	2.07529	1.91967	1.98171	2.1309	2.0383	2.09502	1.94864
chr17:35561821-35565306	H2-Q6	1.4955	1.09731	2.20331	4.10302	0.467819	0.41625	3.37167	0.380513	0.894121	1.74883	1.4086	1.05555	1.01158	1.07255	2.92513	1.43537	2.31126	2.89757	2.59164	1.61982	2.5035	1.57681	3.11192	5.25858	1.82436	1.88798	1.93834	1.94848
chr2:122463622-122466812	AA467197	1.89447	2.02521	1.8253	1.84015	2.07864	2.2682	1.70088	1.7626	1.95964	1.98422	2.13855	1.96206	1.79263	1.84266	1.91458	2.12196	2.01637	2.18035	1.97263	2.00003	1.88296	1.82979	1.92415	1.92638	1.97193	1.92635	1.8629	1.94836
chr9:38935751-38952655	Olfr27	2.03726	2.12601	2.1666	2.11043	2.13811	2.05267	2.05339	2.16197	2.03714	2.19217	2.1904	1.27627	2.0652	2.24571	2.07712	2.13293	2.03696	1.69543	1.07494	2.06077	2.09485	2.13852	2.1482	0.430933	1.92066	1.89563	2.04008	1.94816
chr1:175560989-175578059	Pyhin1	1.76806	2.20429	1.94914	1.87709	2.23029	1.89889	2.18799	2.01174	2.13895	1.92473	2.18883	2.18047	1.76355	1.91568	1.88282	1.93502	1.70602	1.96112	2.13878	2.02111	1.97835	2.0007	1.93666	1.86883	1.57197	1.73961	1.60978	1.9478
chr7:9866726-9882971	Vmn2r43	1.67713	3.66045	1.9891	3.06601	3.75996	2.47646	1.63791	2.46658	2.70841	2.58012	0.79302	1.9263	2.11189	2.75581	1.68679	0.916053	0.490814	1.47768	2.27614	0.52234	0.780499	1.06704	0.547408	0.514383	2.91173	2.93825	2.84326	1.94746
chr7:51251248-51255245	Klk1b11	2.26218	2.22478	2.01815	2.20668	2.34872	2.01112	2.05031	2.18301	1.23966	1.2137	1.18126	2.35218	1.24839	2.59921	0.155231	1.25985	2.10471	2.15589	2.21538	2.23454	2.22946	1.88471	2.11398	2.20174	2.38206	2.39437	2.09315	1.94683
chr6:3322256-3349571	Samd9l	1.97985	2.026	1.99846	1.97239	2.04066	2.08432	1.96134	2.0248	2.0224	1.83962	1.8777	1.84463	1.9302	2.01244	1.85113	2.82279	1.95957	2.07769	1.9048	1.99297	1.83806	1.93076	1.90685	1.07369	1.89696	1.86378	1.81106	1.94611
chr14:3609810-3650049	1700110I01Rik	1.28492	2.6428	3.50407	1.30271	2.09024	1.58691	2.17359	1.70111	0.283894	1.60017	1.67654	1.17844	0.578115	0.922116	1.37378	1.53581	1.5538	1.34663	2.26103	1.86033	1.90374	2.62921	2.38592	2.63156	3.39118	3.56252	3.51726	1.94364
chr5:109715287-109726575	Vmn2r15	1.98574	1.97932	1.90262	1.92831	2.03754	1.93173	2.08771	2.0233	1.88731	2.0228	1.03368	2.00866	2.07123	2.26866	2.02174	2.054	1.92727	2.00939	1.95517	1.8935	1.94115	1.90033	1.93795	1.92586	1.93368	1.9882	1.82099	1.94362
chr13:27186057-27192129	Prl3d1	2.0001	1.97896	1.86562	1.89912	2.02476	1.83214	1.99868	1.95543	1.94344	2.05812	2.12262	2.03029	1.79435	2.11759	2.07718	2.00386	1.96155	0.882338	2.05394	1.93455	1.90152	1.88325	1.97257	1.90732	2.23463	1.95936	2.04254	1.94207
chr2:175868369-175881015	Gm14391	1.60814	1.42853	0.960533	1.0539	1.39148	1.57324	1.03686	1.91468	2.57165	1.96173	3.87829	3.52804	1.69262	1.85213	3.54023	3.18824	1.55698	2.15259	2.08024	0.869328	3.59367	1.65003	1.28367	0.747248	1.73471	1.93228	1.61892	1.94074
chr14:51272913-51273858	Olfr746	1.71132	2.02888	1.7126	2.36868	1.9728	1.81855	1.96788	1.64495	2.01765	1.90055	2.10981	1.72199	2.31746	1.05057	1.80038	2.28997	1.94017	1.74582	2.01114	1.74793	1.86438	2.15185	2.3609	2.07004	1.55648	2.12596	2.38535	1.94052
chr11:58654617-58655544	Olfr311	2.23544	2.13463	2.38124	2.31613	2.07955	1.91538	1.71245	1.9565	1.39115	0.72198	1.38735	1.9317	1.74934	1.89987	2.11868	1.70622	2.01327	1.99666	1.52701	1.95237	2.05763	1.82493	2.15234	2.51538	2.35488	1.96661	2.37374	1.93972
chr4:143157369-143163701	BC080695	1.84088	1.50344	1.23593	1.89654	2.10416	1.07663	1.93466	1.82766	1.75489	1.6117	1.61799	1.42995	1.78347	1.8297	2.37385	1.66858	1.54761	2.98029	5.39592	2.79241	1.81805	3.22018	1.87544	2.12516	1.07666	1.05282	0.97907	1.93902
chr9:38280333-38281266	Olfr905	1.71778	2.06145	2.17725	1.9836	2.37488	1.97934	1.98793	2.05129	1.79571	1.91885	2.00532	1.93623	1.96939	1.90324	1.74912	1.08984	1.70282	2.00731	2.19108	2.0771	1.90707	1.87008	1.77667	2.15762	1.99579	2.2613	1.64577	1.93681
chr14:44534733-44540745	Ang3	2.50161	4.12158	3.11816	2.6733	2.20469	3.38684	2.32533	3.99803	0.980435	1.06954	1.05581	1.44181	1.14168	0.945507	0.988672	1.5872	2.18812	1.52905	2.03241	3.13213	2.4499	2.11645	1.49527	2.17949	0.514482	0.560432	0.546388	1.93646
chr5:95939760-95951421	Gm3286	0.894055	2.49218	0.126416	3.14267	3.21229	3.78949	2.7042	4.91988	0.907609	1.19873	1.74356	2.72962	1.78962	0.260855	2.97335	2.81295	0.0149138	2.05279	1.88289	1.16014	1.38753	1.39375	2.03753	0.115052	2.46707	2.61816	1.34627	1.93235
chr6:56906506-56907400	Vmn1r4	2.01995	2.10121	1.64213	1.82791	2.20617	1.98735	2.11405	2.19428	1.84848	2.08595	1.91572	0	2.26197	1.30964	2.18583	2.28069	1.99235	2.43433	1.89074	2.0877	1.92966	1.88149	2.07896	2.03232	1.72752	1.87031	2.14701	1.92792
chr15:77449397-77457828	Gm8221	1.09673	1.99083	1.14155	2.03675	2.98255	1.83441	1.96114	2.95829	0.735302	1.23474	0.868166	0.744583	1.59945	1.8995	1.80916	2.14596	1.63308	2.54945	2.9458	1.01302	1.97968	2.01826	2.09811	3.01469	2.54735	2.69517	2.5124	1.92763
chrX:4074963-4076923	Gm10921	1.6531	1.3108	1.49865	1.40686	1.83297	2.75387	1.57423	1.97307	2.31798	2.31654	3.72133	2.25545	3.13858	2.49565	4.16898	2.31499	1.23601	0.848675	1.39348	1.3511	0.996913	1.41186	1.19809	1.0307	2.48031	1.00127	2.31921	1.92595
chr6:123974775-124012053	Vmn2r26	2.10421	2.0662	2.06097	2.09815	2.14565	1.99498	2.08151	2.0823	2.10849	1.1799	0.401589	1.34429	2.05839	2.36632	1.33446	1.25219	2.16601	2.11696	2.12374	2.06156	2.11888	2.07317	2.125	2.08758	2.09887	2.15707	2.14596	1.92424
chr9:32122367-32151822	Kcnj5	0.965014	2.01105	1.97783	2.02752	2.06729	1.9625	1.0332	2.01175	1.95972	2.0362	1.98673	2.03534	2.0288	1.97248	2.03943	1.92684	1.99114	2.0216	1.9933	2.01657	1.98494	2.06671	2.03117	2.00825	1.94491	1.89263	1.95293	1.92392
chr13:50738596-50741207	Gm904	2.23538	2.94976	1.31223	3.1435	1.59322	1.98451	2.33738	3.21864	1.41649	2.5313	1.90441	2.23069	4.32306	1.73175	2.24958	2.05212	2.12764	0.580496	0.487145	4.24128	1.3205	0.653886	1.50594	0.490027	0.476275	1.42278	1.35293	1.92122
chr3:14363116-14374239	Gm6300	2.0145	1.10161	1.00522	1.02495	2.12074	1.95411	1.98587	1.97645	2.05468	1.98108	2.16549	2.03761	2.14955	1.92978	1.95306	1.99129	2.09547	1.94738	2.06319	1.99387	1.99562	2.00145	2.07637	1.9978	1.93683	2.16961	2.14511	1.92106
chr7:115238110-115239082	Olfr482	2.01703	2.31717	2.31003	2.20835	2.06841	2.14132	2.33465	2.42628	1.3718	1.14343	1.5261	1.30685	1.1055	1.02492	2.00832	1.74111	2.23974	2.16287	2.35738	1.61261	2.21904	2.16055	2.33627	1.78945	1.27415	2.1104	2.52775	1.92005
chr2:175019779-175032425	Gm14391	1.55178	1.38511	0.907502	1.00288	1.41155	1.57316	0.968977	1.93704	2.41494	1.98903	3.75112	3.52905	1.73967	1.88914	3.50144	3.35653	1.48323	2.05631	2.10964	0.969587	3.61861	1.55182	1.2952	0.855272	1.83261	1.58161	1.53711	1.91852
chr4:118481459-118482467	Olfr1335	1.56913	1.66903	1.71229	1.29304	1.92876	1.40399	1.49727	1.73474	1.95813	3.11232	1.8093	2.02312	1.58401	2.34446	1.82849	2.56982	2.5028	1.65712	1.92925	1.98035	1.86584	2.24133	1.63088	2.13265	1.22812	2.09214	2.48925	1.91806
chr3:88625931-88636409	1500004A13Rik	1.97719	1.96472	2.05005	2.10637	1.71484	2.16685	1.78664	1.78033	1.92475	1.48573	1.90331	1.86132	2.0324	2.03618	2.01863	2.72262	0.419029	2.01833	2.03295	1.98325	2.07465	1.93034	2.03511	2.08658	1.8554	1.86925	1.88036	1.91545
chr14:3849203-3889441	1700110I01Rik	1.20205	2.66565	3.51143	1.3183	2.10102	1.52553	2.08301	1.67391	0.278232	1.60711	1.68176	1.16649	0.594963	0.911062	1.35588	1.49985	1.49352	1.32724	2.28877	1.80324	1.88011	2.55621	2.37991	2.67449	3.29497	3.46986	3.35528	1.91481
chr7:11591093-11595896	Zscan4c	1.11388	1.77834	1.57231	1.80421	1.97522	1.25401	1.22797	1.95541	2.75429	2.63898	2.03364	2.46093	3.60756	3.9592	3.81454	1.33748	0.604311	1.17289	0.542265	0.625887	1.28462	2.16103	0.664066	2.58387	2.20845	2.33758	2.18414	1.91323
chr7:55453582-55454548	Mrgprb4	1.63431	1.62081	2.14863	2.28562	1.98446	1.57358	1.91842	2.02154	2.0437	2.07053	2.45855	2.01555	2.32546	1.96962	1.96082	2.09778	1.78992	1.72572	2.07945	1.87892	1.97053	2.48039	1.79334	2.2028	1.14088	1.24686	1.21717	1.91316
chr8:37157881-37210841	D8Ertd82e	1.93906	1.93093	1.99742	1.98291	1.96779	1.05828	1.94435	1.9729	2.01697	1.96273	1.97473	2.01207	1.95516	1.92037	1.96284	1.99015	1.9659	1.94827	1.96384	1.94006	1.96651	1.98077	1.98543	1.96532	1.73616	1.79454	1.80816	1.91273
chr8:36645556-36652074	Gm16793	2.03341	1.94718	2.00866	1.98927	1.84324	1.08639	1.93086	1.90578	2.06605	1.88187	1.52373	1.68016	1.94595	1.83947	2.12313	1.7944	1.94532	1.9769	1.87234	2.13333	1.93273	2.10104	1.99025	2.07299	1.92063	2.1065	1.96138	1.91159
chr13:22897448-22898387	Vmn1r209	1.94807	1.81238	1.90086	1.87268	1.95478	1.93735	2.00533	1.84925	1.87534	2.03117	2.01877	1.73875	1.80691	2.04874	1.99924	1.76028	1.73015	1.90483	2.20658	2.04413	2.09208	1.94577	1.89982	1.87063	1.72796	1.95598	1.67265	1.9115
chr1:21275326-21288393	Gm4956	1.88656	2.03735	1.92956	1.87621	1.98688	1.89653	1.98772	1.83059	2.54703	2.54012	1.78504	1.97661	2.60705	1.94075	1.79278	1.74888	1.82093	1.83021	1.75236	1.907	1.87715	1.87217	1.85995	1.80917	1.57294	1.47472	1.44943	1.91095
chr8:107370967-107378382	Ces2c	2.50571	2.18067	2.21817	2.17225	2.23054	1.82399	2.62112	2.04072	1.61978	1.67942	0.86591	1.35662	1.67326	1.59509	1.34218	0.868565	2.20867	2.1457	2.21198	2.17006	1.6636	1.63739	1.9563	2.12987	2.1899	2.12102	2.36661	1.91093
chr17:38088995-38089967	Olfr761	0.942156	1.48384	2.08799	1.71116	2.04274	2.27376	1.16921	2.02512	1.67985	2.63703	2.73052	1.75679	2.39869	2.06699	3.59835	2.60091	1.24189	1.46928	2.38806	1.22015	1.16587	1.48794	1.45879	1.32618	2.51785	1.82428	2.279	1.91053
chr2:111260188-111261106	Olfr1286	1.58764	1.64157	1.12515	0.961112	0.961859	1.73902	0.0332704	1.68524	2.06785	1.9	2.42857	2.28015	2.29142	2.23844	2.44766	2.16571	2.24845	2.1136	2.0978	2.18644	2.50458	2.29506	2.2959	1.99057	1.83169	2.2361	2.19158	1.90913
chr2:175868376-175882314	Gm6710	1.57215	1.39451	0.922458	1.04425	1.3552	1.5335	1.0148	1.88503	2.50837	1.95611	3.79755	3.44852	1.67838	1.79564	3.48294	3.19512	1.50456	2.11032	2.05918	0.841009	3.67505	1.60613	1.27159	0.749787	1.67052	1.87527	1.57329	1.90819
chr8:22805483-22806325	Defa-ps1	1.84747	1.84244	1.74835	1.77551	2.23201	1.75561	1.83099	2.80778	2.07522	1.22822	1.57433	1.58292	1.49597	2.00169	1.64426	1.74858	1.6403	1.89206	2.49702	1.92212	1.92914	2.0756	2.17375	1.95125	1.94514	2.0696	2.22367	1.90781
chr1:19202134-19228815	Tfap2b	1.82534	1.85548	1.79497	1.84619	1.9505	1.99369	1.8606	1.91054	1.89352	1.8916	1.93858	1.94802	1.81513	1.74293	1.87695	1.78757	1.90975	2.88785	1.86985	1.89677	1.90479	1.86047	1.79495	1.8176	1.98552	1.75054	1.8848	1.9072
chr8:22331251-22332228	Defa23	2.49346	2.21629	2.30731	2.1092	1.33824	1.17878	2.41011	2.34833	2.60659	2.77932	2.07943	2.26731	1.56347	3.4786	2.11452	0.92301	3.13888	1.29417	1.5959	2.7436	1.04907	1.74219	2.56723	2.59769	0.0678624	0.101142	0.375696	1.90694
chr17:23141937-23143626	Vmn2r-ps129	2.22572	1.94361	2.09296	1.5983	1.79761	2.0801	1.74887	1.77782	1.55225	2.85491	1.78931	1.87177	1.82908	1.51394	2.18091	2.33808	1.7346	1.87264	1.76791	2.26058	1.56302	2.03329	1.71541	2.09826	1.65704	2.22389	1.36549	1.90694
chr8:22331251-22332229	Defa-rs7	2.49235	2.21566	2.30618	2.10962	1.3382	1.17915	2.40912	2.34778	2.60628	2.77863	2.07962	2.26694	1.56299	3.47873	2.11545	0.922846	3.13947	1.2945	1.59534	2.74394	1.04916	1.74219	2.56678	2.59787	0.0677931	0.101076	0.375736	1.90679
chr4:60591132-60595027	Mup10	1.34737	1.15324	0.78403	1.33045	1.19885	1.99676	1.12428	1.41507	1.1989	1.12207	0.686589	1.23076	0.58855	0.68151	0.619805	0.826307	3.14771	4.69084	5.71994	0.790121	2.33628	1.80191	5.12411	2.26471	2.82316	2.76942	2.67416	1.90544
chr6:89985926-89986835	Vmn1r48	2.00674	1.98593	1.87277	1.46996	1.96549	2.04381	2.26765	2.11641	1.20662	2.70311	2.40838	2.19792	2.08745	2.12445	2.31388	2.27314	2.03931	1.85338	0.854266	2.04811	0.925402	2.08533	1.51641	0.443904	2.134	2.26435	2.21194	1.90445
chrX:72212182-72214464	LOC100503280	1.80115	1.76561	1.73625	1.85377	1.72337	1.77158	1.83864	1.90987	2.73021	2.20084	1.75286	2.86943	1.78144	1.98784	1.9148	0.970113	1.70467	1.63545	1.87762	1.81196	1.60377	1.57867	1.83202	1.69017	2.34245	1.77561	2.95937	1.90443
chr4:143204905-143208498	Gm13083	1.94941	2.09361	1.83919	2.11277	1.97313	1.9362	2.08472	1.97212	1.88692	2.14378	2.07402	2.35083	1.58165	2.16711	2.90298	2.03344	1.81273	1.54646	2.09442	1.89096	2.13903	1.93648	1.45344	1.42619	1.05764	1.44737	1.41769	1.9009
chr18:37571327-37574168	Pcdhb10	1.75546	2.33023	1.9647	1.78364	2.02294	1.99313	1.85509	2.12205	1.28834	2.03199	2.00143	1.35943	1.32781	1.37073	1.81304	2.13309	2.06886	1.86485	1.89097	1.91262	1.92251	1.95434	2.10164	2.03475	2.02021	2.31602	2.07239	1.90045
chr17:36281962-36299319	2410017I17Rik	1.85573	2.49551	2.61251	1.15014	1.40922	0.712378	3.47838	0.176793	1.62281	1.4196	1.32947	1.5954	0.580883	3.49736	1.0178	1.97581	3.72364	1.51872	1.97721	2.2707	0.785747	1.33077	3.02367	2.97996	2.20993	2.0844	2.4179	1.89824
chr10:128597084-128598038	Olfr771	2.06308	2.11256	1.84552	1.96496	1.75628	2.18508	2.05452	1.05767	1.78908	1.95427	2.09054	2.17435	1.89343	2.22499	1.74997	2.29451	1.94618	2.04535	1.85029	0	2.01123	2.17068	1.858	2.18662	2.00732	1.9001	2.02739	1.89681
chr17:36301388-36305482	Gm8909	2.95145	3.48645	3.6316	1.47788	2.80268	1.64379	4.1263	0.505812	0.755941	1.83898	0.910091	0.813294	0.693463	1.72109	0.82367	1.96456	2.40156	1.79007	1.72963	2.56669	0.782288	0.857477	2.44781	1.72662	2.16723	2.24167	2.28491	1.89419
chr7:110987637-110989035	Hbb-bh2	2.09236	2.30075	1.9751	1.93979	2.08785	2.04465	1.95667	2.24364	1.95279	1.63931	1.84609	1.79803	1.56415	1.53523	1.54491	1.81906	2.04853	2.1853	2.09881	1.96394	1.99435	1.97035	2.39126	2.27971	1.37022	1.03683	1.4192	1.89255
chr9:37923382-37924312	Olfr889	1.39587	1.4293	1.50982	2.04625	2.04529	1.85967	2.61745	1.11219	2.14287	2.24362	2.28352	2.30908	2.42254	2.34828	2.07414	2.43681	1.97371	2.21457	2.19419	1.97434	2.06212	2.10278	1.0001	2.38906	0.795235	0	2.09572	1.8918
chr1:19198994-19228815	Tfap2b	1.80741	1.83766	1.76816	1.8213	1.9248	1.97946	1.83866	1.8766	1.88924	1.88203	1.90781	1.9277	1.79823	1.72614	1.87985	1.76513	1.8954	2.86539	1.84881	1.88699	1.87245	1.84734	1.79346	1.80565	1.94601	1.74226	1.87209	1.88911
chr2:175018480-175032418	Gm6710	1.52632	1.3568	0.877585	0.971736	1.40349	1.53	0.954373	1.92595	2.40822	1.98317	3.68601	3.45681	1.71596	1.85353	3.42877	3.32164	1.4349	2.01798	2.06299	0.927515	3.69971	1.50941	1.24884	0.858534	1.80431	1.54762	1.49139	1.88902
chr5:149965703-149967768	Gm8615	1.03384	2.00761	2.69272	0.929306	3.18433	1.28791	1.9991	2.97217	0.681879	1.09815	0.870218	0.288554	2.93555	0.799228	1.0798	1.63558	2.273	2.75688	2.54848	1.20439	2.51977	1.21542	2.48265	2.74978	2.7449	2.30377	2.65149	1.88691
chr9:19612763-19613693	Olfr859	1.96969	1.77083	1.66597	1.76067	1.79389	1.77792	1.96601	1.76214	2.04968	1.33255	1.91395	1.78348	1.84909	1.76599	1.67537	1.54945	2.0952	2.0206	2.04437	1.86281	1.94285	2.29031	1.87011	1.96444	2.35171	2.08802	1.98373	1.88522
chr9:78104935-78116973	Gm3776	1.24859	2.28491	2.738	1.74493	3.4431	1.83234	2.38375	2.28453	2.05775	3.49789	1.14	2.14093	1.25482	1.56492	1.15292	2.74032	1.21044	2.24058	1.59142	1.71055	1.60797	2.5868	1.58264	1.16607	1.17727	1.22858	1.25399	1.88393
chr7:5959351-5962612	Vmn1r65	2.03407	1.86917	1.86359	2.00455	1.88923	1.79495	2.00659	1.92562	1.79942	1.97997	1.03524	1.01595	1.99089	2.11224	2.07165	1.90894	1.91545	2.03977	1.96546	1.88615	1.95577	1.97267	2.00909	2.04845	1.94153	1.97823	1.83132	1.88318
chr17:37247986-37248925	Olfr92	2.31017	1.55054	1.79474	1.49989	0.895882	0.938898	2.20981	1.09837	2.43554	1.5659	2.03231	2.44146	2.37749	2.33513	2.26878	2.09819	1.9559	1.99053	1.13364	1.81147	2.33729	2.35553	1.63061	1.79078	1.87457	2.09283	1.99565	1.88229
chr16:16819805-16820289	Rpl31-ps12	1.87477	1.84724	1.95395	2.86003	1.62006	0.759368	2.41524	1.16433	1.31476	3.70895	3.11662	1.04303	2.53211	0.987613	2.47492	1.83213	1.91833	1.7499	0.692544	2.32103	2.49498	1.86025	2.57414	2.36891	1.18425	0.906736	1.23819	1.88201
chr9:78023720-78026689	C920006O11Rik	1.77059	1.83648	1.94566	2.19463	1.82457	2.56348	1.61667	1.83164	2.0849	1.79352	1.89505	1.94042	1.99211	1.50266	2.06393	1.79435	2.02105	1.83458	1.87447	1.85924	1.89289	1.744	1.9701	1.92179	1.64023	1.5296	1.79549	1.87904
chr7:149459668-149460268	Gm4559	1.33634	3.07335	3.56279	2.12911	1.31785	2.84084	2.39992	2.03944	1.98112	1.71474	1.52489	1.68428	0.979062	1.5919	0.606923	0.437185	2.63953	2.41086	2.36728	2.34437	2.68444	2.47361	2.48942	2.56869	0.0474004	0.121271	1.32796	1.87758
chr17:13253976-13275092	Tcp10b	1.50072	1.61766	1.23743	1.43476	2.27507	1.89585	1.47907	1.91558	1.7232	2.64002	2.1026	1.99671	2.31881	2.36778	2.47057	1.83145	1.47054	1.51117	2.05642	1.49772	1.48698	1.58323	1.41824	1.87848	2.04155	2.46444	2.47097	1.8773
chr11:50840505-50841447	Olfr54	2.56834	2.41926	1.45142	2.06186	1.90646	2.19907	2.39529	2.67345	0.264165	1.28422	2.14042	1.522	0.490701	0.486877	2.24483	1.95003	2.25607	2.31888	1.31324	2.13682	1.49642	2.1243	1.45487	1.95447	2.68796	2.63334	2.23809	1.87677
chr8:36927138-36946011	5430403N17	1.84341	1.9802	1.97681	1.91039	1.89269	1.0214	1.94852	1.92279	1.91052	1.89131	1.97091	1.95527	1.95052	1.78691	1.94056	1.90667	1.96307	1.96397	1.8772	1.95481	1.93311	1.90811	1.91303	1.95695	1.81648	1.82714	1.71798	1.87558
chr1:176260648-176263008	1810030J14Rik	1.70202	1.98521	1.94917	2.02708	1.99598	1.93847	2.0358	2.07408	1.93387	1.95127	2.04842	2.18386	1.99625	1.07409	1.93778	1.85241	1.93993	1.90168	2.00202	2.0446	2.12102	1.83866	2.03174	1.95132	1.2759	1.32631	1.51776	1.87543
chr8:36887762-36889613	Cldn23	1.66288	2.03689	1.88597	2.00445	2.06032	0.996895	1.79998	1.93521	2.03096	1.99015	1.85622	1.89422	1.84767	1.67002	1.86926	1.93187	2.16159	1.98695	1.94972	2.17486	1.83517	1.95023	1.84765	1.65178	1.83681	1.84625	1.79282	1.87062
chr13:50774538-50775593	2310081J21Rik	1.67695	1.92319	1.16423	2.20059	1.408	1.67645	1.72756	2.39272	2.15334	1.00927	1.05108	2.34277	3.72442	1.70659	1.70769	2.43462	1.99404	1.36176	1.52728	2.4255	2.02296	2.60518	1.96613	1.67086	1.33319	1.43358	1.84111	1.86967
chr7:12806664-12811156	Gm4224	2.02336	2.02612	1.9333	1.7848	1.92912	1.87147	1.92679	1.98509	0.880166	1.96524	1.7905	1.87643	1.90506	1.90043	1.88643	1.92628	2.00409	1.93228	2.0242	1.88193	1.82855	1.87289	1.88493	2.01394	1.93147	1.81644	1.64612	1.86842
chr17:13104220-13108957	Mrpl18	1.89891	1.98601	1.91365	1.91565	1.66331	1.90187	1.78594	1.64193	1.93458	1.77058	1.79577	1.7483	2.639	2.02646	2.20177	1.90515	1.89932	1.63441	1.67123	1.86357	1.82026	1.81887	1.78209	1.80987	2.07998	1.66195	1.64099	1.86709
chr4:60672252-60675243	Mup2	1.89607	1.08964	1.03495	1.89778	1.59586	2.19277	1.47644	2.58664	0.859179	0.945732	0.807207	0.875524	0.726951	1.53902	0.814434	0.662165	4.12954	3.74063	6.20422	0.342337	1.05353	1.33474	3.98346	2.35282	1.98955	2.00857	2.26048	1.86668
chr6:41323757-41327612	Prss3	1.65494	2.08262	1.17949	1.24653	2.20765	1.75478	1.62445	2.99814	2.0319	1.47087	1.30196	1.50273	2.14225	1.56807	1.94123	0.85399	2.11622	2.62101	2.56052	2.69623	2.84479	1.63368	2.3376	1.76247	1.21148	1.58752	1.46657	1.86666
chr5:105242186-105289087	Zfp951	1.82008	1.9819	1.82152	1.97329	1.872	1.76685	1.75879	1.80376	1.84371	2.17549	1.85912	2.14812	2.06273	2.38057	2.11823	1.88568	1.83954	1.84382	1.8475	1.8967	1.84048	1.88526	1.8356	2.05867	1.37529	1.39694	1.26473	1.86505
chrX:4219982-4221937	Gm5925	1.95321	0.827632	2.09762	0.922056	2.20216	3.91781	2.14348	2.00478	1.0184	2.07538	2.21286	1.18214	2.0362	1.71572	2.63965	1.41197	1.61258	0.657054	1.72542	1.78238	1.55253	1.48858	1.60297	1.56236	3.11481	1.52442	3.21463	1.85921
chr7:110708992-110709934	Olfr615	1.63003	2.27663	1.83398	1.94633	1.84652	1.81007	1.87282	1.70131	2.04902	1.7283	1.83958	1.52003	1.68114	1.58808	1.95619	1.83197	1.73305	2.0888	1.95395	1.83106	1.96912	1.93951	1.99817	1.95348	1.54791	2.12071	1.9225	1.85816
chr17:36252820-36258380	H2-T10	3.47491	1.5785	2.54786	0.625008	3.85533	3.25967	5.31055	0.861728	0.638886	1.82197	0.599381	0.650305	0.663301	0.992823	1.09879	1.42034	1.23775	3.08307	1.4261	2.39422	1.98876	0.618936	3.45797	1.23309	1.762	0.838188	2.69455	1.85681
chr17:36252815-36258389	H2-T10	3.47338	1.57876	2.5482	0.624012	3.8534	3.25833	5.30907	0.860722	0.637449	1.82056	0.598182	0.649038	0.663457	0.990743	1.09781	1.41868	1.23509	3.08334	1.42531	2.3944	1.98741	0.617894	3.45695	1.23297	1.76173	0.838812	2.69517	1.85596
chr4:61711268-61715151	Mup20	1.49717	1.13237	1.11224	1.3029	1.51492	1.123	1.26702	1.09547	1.8782	3.31323	2.39623	2.23713	2.28935	2.309	2.24214	1.7975	1.67889	2.67496	1.8561	2.05077	2.26433	2.31534	1.56328	1.83161	1.85589	1.72223	1.75324	1.85461
chr2:151127774-151141739	4930442J19Rik	2.07889	1.54116	1.60627	1.38608	2.2166	2.14135	2.36871	1.69462	1.45009	1.65909	1.30359	1.53398	1.75562	1.39853	1.08452	2.89062	1.8166	1.92815	2.74854	1.81916	1.91151	1.76752	1.8232	2.69672	1.81378	1.85344	1.77369	1.85415
chr2:10422961-10423058	Mir669a-1	1.46894	2.68351	2.24275	1.2325	2.06314	0.986057	1.97682	2.12105	1.57705	0.417713	0.631624	1.25862	2.10659	1.08363	1.26871	1.56544	2.18289	1.8454	2.14718	2.56745	2.10655	2.04724	2.4179	2.36054	2.62115	1.88359	3.14417	1.85216
chr7:9147158-9163091	Vmn2r39	0.750342	3.19458	1.37736	2.28099	3.35265	1.7079	0.825812	2.0334	2.49139	2.30706	1.11114	1.9691	2.0107	2.16202	1.97595	1.14861	1.02919	2.00133	2.0241	0.974498	1.23441	1.49398	1.03519	1.04217	2.74865	2.86925	2.823	1.85092
chr6:130241178-130258379	Klra23	1.3413	0.898136	0.625201	1.62082	1.54941	0.944529	0.67127	2.71555	1.49222	3.35108	2.60612	2.10524	2.31532	3.79086	1.55426	0.332652	2.02796	0.852002	2.82256	3.68932	1.68735	1.83686	2.9388	2.33499	0.680821	1.91772	1.26634	1.85069
chr10:117642019-117647102	Il22	1.76522	1.91919	1.66915	1.82268	1.70936	1.67998	1.65225	1.71723	1.79866	1.90426	1.54233	1.67465	1.5814	1.70462	1.67134	1.72577	1.92589	2.22831	1.90389	2.08571	2.3693	1.51563	1.99938	1.73637	2.09163	2.27288	2.30132	1.85068
chr2:10420533-10420630	Mir669a-1	1.29833	1.92085	1.77591	1.67367	1.46295	0.597804	1.94378	1.44726	1.09694	0.839614	3.03824	1.19108	2.41519	0.590752	3.21151	1.8955	1.90386	2.00645	2.29899	1.72642	1.85843	2.20422	1.68808	2.09864	2.57193	2.45737	2.71704	1.84929
chr7:21918229-21919147	Vmn1r122	1.59893	2.17642	1.74242	1.74579	2.7628	1.7148	1.53565	0.98854	0.830181	2.35423	2.50599	1.77219	2.14162	2.24226	2.02591	1.39582	2.65724	1.47475	1.4388	0.401177	2.73305	3.12336	3.53156	2.29485	0.165153	2.38359	0.190492	1.84917
chr2:10420531-10420626	Mir669a-2	1.29175	1.88459	1.76032	1.67367	1.46295	0.597804	1.93734	1.4633	1.10176	0.839614	3.03824	1.22485	2.43266	0.590752	3.21151	1.8955	1.90386	2.00645	2.29899	1.73151	1.84516	2.2114	1.67536	2.07797	2.57193	2.45737	2.71704	1.84828
chr4:60671338-60675267	Mup11	1.8795	1.13144	1.07565	1.8618	1.83001	2.11237	1.64797	2.74552	0.770933	0.813847	0.750359	0.810042	0.766208	1.60797	0.797171	0.62085	4.06556	3.64297	6.11987	0.326272	0.900864	1.26883	3.8398	2.38601	2.02102	1.92386	2.18518	1.84822
chr2:10422965-10423052	Mir669a-10	1.46726	2.68012	2.24019	1.23122	2.06314	0.984918	1.9744	2.11847	1.57505	0.348355	0.638034	1.25707	2.10396	1.08209	1.26728	1.56343	2.18017	1.84317	2.14454	2.56435	2.10399	2.04489	2.41495	2.35793	2.62115	1.88359	3.14417	1.84807
chr10:78417951-78418884	Olfr8	1.82671	2.27797	0.494866	1.47616	1.88576	0.940588	2.26135	1.96929	1.751	2.06007	2.31869	2.20649	2.36368	2.52859	2.66331	1.21204	1.43371	1.78816	1.55448	1.3685	1.83912	2.11453	1.89407	1.39132	2.01845	1.89833	2.35866	1.848
chr7:16418598-16425028	Obox6	1.68992	1.88724	1.63251	1.71301	1.73507	1.60169	1.73777	1.64347	1.78365	1.85492	1.78348	1.802	1.74774	2.11745	1.71262	1.86431	2.64765	1.78579	1.83398	1.8549	1.77178	1.92232	1.84574	1.72607	2.03685	2.16032	1.99277	1.84759
chr2:10420537-10420624	Mir669a-10	1.2909	1.88497	1.75956	1.67367	1.46295	0.597804	1.93586	1.4609	1.10039	0.839614	3.03824	1.2216	2.42923	0.590752	3.21151	1.8955	1.90386	2.00645	2.29899	1.72952	1.84419	2.20882	1.67451	2.07721	2.57193	2.45737	2.71704	1.84753
chrX:52804772-52821634	Gm16404	1.88712	1.83955	1.85624	1.88381	1.87306	1.81062	3.82035	1.81178	0.992176	2.07356	2.48841	1.04794	2.42873	3.19753	2.81856	2.63598	1.15246	1.02998	1.07587	1.09914	1.05049	1.08541	1.04801	1.06956	2.06258	0.995901	3.71022	1.84611
chr2:10422959-10423054	Mir669a-2	1.47325	2.65235	2.25113	1.25242	2.06314	0.987866	1.96326	2.10885	1.55766	0.370842	0.636345	1.2486	2.08593	1.05067	1.27575	1.54388	2.16148	1.8369	2.13126	2.55571	2.0934	2.05266	2.4029	2.37972	2.62115	1.88359	3.14417	1.84388
chr2:10425413-10425510	Mir669a-1	1.06535	2.35832	1.61668	1.18259	1.55944	1.06707	2.45023	2.00234	1.54625	0.817966	1.826	2.35567	2.62857	1.8349	1.87229	2.03098	2.15246	1.75793	1.50183	1.98858	1.7459	1.98777	1.53796	1.88324	1.99117	2.718	2.28388	1.84309
chr10:51200484-51206025	Gp49a	0.7346	1.50226	2.31446	2.23099	1.95616	1.13601	0.837262	2.26195	2.19372	1.74423	1.41318	1.39427	1.58329	1.7083	2.35778	1.92902	2.49949	2.16184	1.82815	2.34001	1.99029	1.73828	1.51084	1.90187	2.17114	2.19137	2.07032	1.84078
chr14:3518337-3535897	Gm3020	1.30116	2.32686	2.49076	1.10742	1.57506	1.43153	1.48174	1.45057	0.774605	1.79766	1.90871	1.74671	1.41926	1.21812	2.07879	2.18279	1.51694	1.42256	1.89395	1.94132	1.71125	2.13868	2.04431	2.48261	2.6684	2.7731	2.81057	1.84057
chr7:55643895-55645018	Mrgprb8	2.22056	2.07029	2.10668	2.04972	1.96647	1.96789	1.9447	2.29143	2.33584	1.76318	2.28965	2.61029	2.00889	2.21539	2.2159	1.99302	1.7456	2.14529	2.02908	2.06067	2.03567	2.34301	2.14125	1.0871	0.0165887	0	0	1.83904
chr11:73299388-73300324	Olfr381	2.16538	1.89696	2.19724	1.59671	1.03	2.10327	2.08475	1.78696	2.28804	2.40655	2.01907	2.02308	2.0373	2.88904	1.46911	2.30368	2.04771	2.02748	1.06971	1.95747	1.88084	1.19269	1.39482	2.10412	1.04437	1.29753	1.30129	1.8376
chr14:3757740-3775300	Gm3020	1.20182	2.26972	2.5693	1.08385	1.61492	1.38694	1.51059	1.41767	0.801502	1.82284	1.87357	1.76571	1.44512	1.2099	1.93267	2.16274	1.50192	1.38568	1.92493	1.90419	1.7086	2.19977	2.00211	2.5438	2.72611	2.71169	2.88927	1.83581
chr2:10425417-10425504	Mir669a-10	1.06535	2.35832	1.61668	1.13606	1.55944	1.08751	2.45023	2.00234	1.54625	0.816808	1.8239	2.35567	2.62857	1.77983	1.89855	1.91765	2.13215	1.74009	1.45843	1.98858	1.7459	1.98777	1.53796	1.88324	1.99117	2.718	2.28388	1.83372
chr17:39173639-39177172	Esp24	0	2.06283	2.16589	1.16112	1.04451	0	2.1731	1.11719	2.17246	1.96256	2.26002	2.28801	2.21113	2.145	2.1135	2.12461	2.1949	2.31974	1.06641	2.13651	2.15381	2.27208	2.03179	2.0871	2.02709	2.15745	2.04896	1.83325
chr7:134525773-134530680	9130019O22Rik	1.78815	1.72732	1.9847	1.70923	1.75933	2.02705	1.25843	1.94235	1.83118	2.10543	1.53056	1.58582	1.56627	1.80968	1.61866	1.63206	1.89903	2.06283	1.88953	2.12422	1.92614	1.6878	1.6165	2.14224	1.98366	2.1293	2.15535	1.83307
chr7:55276340-55282967	Mrgprx1	2.03781	1.81947	1.92397	1.88906	1.83242	1.86742	1.91849	2.13651	1.82338	1.76517	1.99744	1.95805	1.8371	2.1092	2.09373	1.68206	1.80397	1.82651	1.7707	1.95498	1.92338	2.03614	1.82659	1.86271	1.13462	1.41444	1.22982	1.83241
chr7:18761842-18767211	Igfl3	1.87815	1.81416	2.05939	2.00187	1.85385	1.8844	1.78845	1.89596	1.93398	1.97848	1.9062	1.94253	1.89467	1.98069	1.79325	2.06553	1.89901	2.13141	1.9521	1.82092	1.89059	1.84132	2.01341	1.92273	0.936087	1.20183	1.14222	1.83049
chr4:60148804-60152729	Mup2	1.3595	1.55814	1.02494	1.49939	1.56744	1.91089	1.26118	1.85376	0.94416	1.47546	0.85827	1.12879	0.774046	0.753107	0.843304	0.855696	2.47412	3.55075	4.77786	1.19313	2.65927	1.99504	4.53186	1.83259	2.34341	2.17808	2.21849	1.83047
chr14:6973740-6991301	Gm3020	1.21707	2.31198	2.42258	1.09492	1.47507	1.39141	1.59926	1.3554	0.795015	1.73766	1.9104	1.7583	1.39056	1.28546	1.99928	2.17665	1.4844	1.4386	1.81313	1.93728	1.70488	2.18267	2.02896	2.46288	2.72511	2.81876	2.8628	1.82891
chr18:74019040-74038788	Mro	1.83845	1.85144	1.90873	1.91218	2.074	1.9458	1.9144	1.91769	1.89142	1.90583	1.81389	1.89413	1.84972	1.85876	0.920577	1.84282	1.84881	1.85838	1.77742	1.88816	1.8873	1.83969	1.85041	1.85554	1.70137	1.74345	1.75399	1.82757
chr3:113082754-113094367	Amy2a2	2.70394	2.45216	2.93408	2.62818	2.64054	2.64586	2.12013	2.38827	1.12715	1.65725	1.3241	1.20478	1.13805	1.27544	1.25701	1.20687	1.88873	2.02535	1.63453	1.68919	1.78673	2.39419	2.19314	1.97402	1.03148	1.06156	0.89464	1.82509
chr2:80468861-80468947	Mir684-1	2.3697	1.34835	1.75085	1.99014	2.51159	2.49749	2.25596	1.87044	2.1431	2.32006	2.27671	1.23525	1.14681	2.13511	1.26725	2.32506	2.4155	1.85033	1.10847	1.97193	2.11174	1.68897	1.24605	1.50353	1.72584	2.209	0	1.82501
chr6:132545963-132550720	Prp2	1.664	1.89181	1.74107	1.87725	2.00467	1.70698	1.74782	1.66528	1.82267	1.84776	1.57165	2.0148	1.12633	2.24391	1.68898	1.69753	2.06361	1.75262	2.14833	1.60884	1.93539	2.21844	1.62096	1.77261	2.22116	1.6788	1.89555	1.82329
chrX:10876382-10876883	Gm14483	1.8005	1.71044	1.86531	1.25049	1.14884	1.11984	1.51914	1.68002	2.30148	0.848534	1.32477	2.38247	0.957284	1.15262	1.28537	1.3569	2.75327	2.19172	2.19299	1.76505	2.75597	2.57851	3.65312	2.2271	1.48311	0.565388	3.31523	1.82168
chr5:138462503-138475887	Smok3a	1.52123	1.84399	1.80819	1.83997	1.94834	1.46504	1.44355	1.57617	3.00494	2.12418	2.40755	1.98034	1.59728	3.13707	2.0757	2.213	1.48937	1.5186	2.27334	1.49226	1.52919	1.65156	1.4764	1.54222	1.28275	1.46632	1.47448	1.82159
chr5:138462656-138475893	Smok3a	1.52225	1.84353	1.80596	1.84301	1.9279	1.47126	1.44465	1.57512	2.98659	2.11991	2.40837	1.97382	1.60105	3.14352	2.05976	2.21199	1.49015	1.52346	2.27882	1.49242	1.53026	1.64884	1.4818	1.54691	1.27655	1.46933	1.4739	1.82041
chrX:8031468-8038852	Ssxb2	1.8167	1.95225	1.947	1.9126	1.00109	1.74765	1.84666	1.86284	1.89664	1.93545	1.94975	1.91082	1.91198	2.15728	1.95572	1.83181	1.88192	1.95475	1.94566	1.9656	1.00458	1.87016	1.95943	1.88449	1.94885	0.997694	2.03315	1.81787
chr8:36650851-36742503	Mfhas1	1.87046	1.84381	1.87653	1.89917	1.82043	0.964973	1.82112	1.85097	1.94108	1.87439	1.91603	1.92689	1.87441	1.75343	1.85184	1.86604	1.8804	1.90686	1.80948	1.90823	1.89371	1.88844	1.86736	1.88933	1.68607	1.69684	1.70315	1.81783
chr11:49365250-49366186	Olfr1381	1.53216	1.49099	1.6076	1.76901	1.73338	1.89494	1.17631	1.43782	2.31014	2.67245	1.4563	2.40658	2.14669	2.74123	0.822305	3.10822	1.49832	2.38252	1.70296	1.66236	1.59085	1.67771	1.48725	1.57658	1.84189	1.41957	1.76944	1.81169
chr5:73398142-73404194	Slc10a4	1.98422	2.05944	1.58465	1.95869	1.94629	2.02345	1.97129	1.56296	1.5698	1.73586	1.51974	1.12526	1.63546	1.99023	1.27648	1.92564	1.94103	1.82339	1.98508	1.93298	1.88568	1.87943	1.51433	2.03939	2.06432	2.01801	1.87747	1.80854
chr17:39210635-39213982	Gm20581	0	1.91957	2.18654	1.01068	1.03318	0	1.96521	1.19694	1.99466	1.97996	2.15314	2.26525	2.06851	2.03126	2.08749	2.20664	2.20082	2.23591	1.13544	2.1383	2.14289	2.15318	2.15204	2.07678	2.1072	2.19017	2.15942	1.80708
chr2:175010665-175032425	Gm14391	1.57305	1.34437	0.757061	0.909611	1.37266	1.42517	0.950178	1.89692	2.25842	2.01227	3.45298	3.21397	1.68454	1.75942	3.12182	3.15543	1.36363	1.91279	2.09102	0.859457	3.67769	1.3616	1.25425	0.784173	1.7315	1.48778	1.3683	1.80667
chr2:10413188-10413285	Mir669a-1	1.75035	2.27705	1.26675	1.80118	1.22527	1.67585	1.25779	1.03353	1.24952	2.14568	1.32923	1.49206	1.37367	1.98715	1.12335	1.38232	2.08659	1.17229	1.41052	1.57997	1.99802	1.64276	2.51123	1.12909	3.84075	3.7222	3.28987	1.80571
chr2:10413192-10413279	Mir669a-10	1.71115	2.24723	1.25949	1.77859	1.22527	1.6472	1.27677	1.03454	1.23096	2.14568	1.32923	1.4817	1.38464	1.99315	1.11198	1.38744	2.06989	1.16739	1.39039	1.60292	2.00944	1.64754	2.52148	1.13972	3.87262	3.76902	3.31811	1.80569
chr7:7503677-7519497	Vmn2r33	0.491353	2.07115	0.909028	1.73422	2.19497	1.03794	0.55266	1.59444	2.25611	2.40602	2.38445	2.72214	2.67365	2.77533	1.92044	2.31715	0.979651	2.55184	1.31822	0.992368	1.6566	2.12985	0.991967	0.972793	2.31044	2.37024	2.43676	1.80562
chr14:6973740-6994984	Gm10409	1.25945	2.39388	2.54807	1.0971	1.44156	1.44708	1.56848	1.3315	0.759739	1.71873	1.79296	1.6074	1.34384	1.2524	1.9128	2.07241	1.44856	1.43763	1.83634	1.82656	1.65236	2.20942	2.05618	2.47363	2.66707	2.75169	2.79472	1.80376
chr14:3518337-3539580	Gm10409	1.30918	2.3869	2.62408	1.13382	1.55739	1.46472	1.45439	1.40558	0.720354	1.76817	1.79705	1.56503	1.3397	1.15297	1.91659	2.11743	1.42535	1.4266	1.87207	1.82742	1.62152	2.14759	2.06388	2.48264	2.60639	2.72359	2.77905	1.80331
chr4:60511805-60514832	Mup1	1.94297	1.82644	1.71765	1.92213	2.13246	1.75709	0.997646	1.80596	0.725058	1.08226	0.606899	0.670295	0.785984	0.90705	0.652091	1.17906	2.36232	3.43492	4.61187	0.768177	1.5099	1.65344	4.20155	1.39564	2.79771	2.42912	2.7722	1.80177
chr14:3757740-3778983	Gm10409	1.21099	2.34638	2.69437	1.13487	1.59091	1.44745	1.47221	1.37661	0.732785	1.77096	1.76408	1.59119	1.3711	1.15222	1.85214	2.09703	1.45305	1.40566	1.93803	1.77871	1.64231	2.17984	2.03132	2.50936	2.62252	2.67507	2.77947	1.80076
chr4:147195885-147196311	Rps19-ps3	1.70434	1.57214	1.33119	1.86567	1.86669	1.87528	1.69762	1.78407	1.58963	1.85888	1.80417	1.75666	1.07237	1.5916	1.18218	1.89342	2.09779	2.33678	1.87772	2.07373	1.59567	2.58962	2.67083	2.34547	1.2565	1.73482	1.58051	1.8002
chr7:22044712-22045636	Vmn1r124	1.01154	2.00408	1.1932	0.890671	1.98701	2.28755	1.8191	0.982102	3.05756	1.94646	2.19484	3.80294	0.437011	6.0444	2.23715	0.397174	0.325436	1.98321	5.90177	0.198918	2.57752	1.39611	0.390761	0.237878	0.181671	2.07217	1.02311	1.79931
chr19:17400630-17414058	Gcnt1	1.80512	1.8057	1.854	1.96869	1.8393	1.8101	1.83076	1.79812	1.87609	1.85097	1.80602	1.73091	1.88411	1.76318	1.75269	1.9013	1.84984	1.80565	1.91854	1.83161	1.86045	1.85822	1.88736	1.86855	1.50523	1.50274	1.40762	1.799
chr4:60231492-60235471	Mup8	1.61077	1.73205	1.09229	1.93943	1.80871	1.81258	1.60286	1.81586	0.745916	1.1993	1.06415	0.917267	0.681321	1.95497	0.899498	0.662581	2.41975	3.82874	4.54088	0.584988	1.3298	1.62814	4.7413	1.56263	2.08664	2.23929	2.06971	1.79894
chr2:10413186-10413281	Mir669a-2	1.77768	2.29681	1.27078	1.77506	1.22527	1.64195	1.24228	1.03165	1.262	2.14568	1.32923	1.49816	1.36399	1.99719	1.11048	1.3905	2.06823	1.16761	1.387	1.56113	1.98732	1.6374	2.50085	1.11993	3.8128	3.68323	3.26523	1.79813
chr15:63722819-63743852	Gsdmc4	2.01498	2.07824	1.90465	2.07608	2.18796	1.23668	2.13781	2.12498	0.207904	1.04506	0.153048	0.196144	0.647454	1.23116	1.56373	0.150641	1.66337	2.17177	1.38649	1.98867	2.25962	1.75299	2.08787	2.04813	4.01855	4.03966	4.04397	1.79324
chr15:79746236-79763076	Cbx7	1.76135	1.98068	1.81281	1.82705	1.77316	1.9608	1.77635	1.81408	1.92409	1.86911	1.82719	1.66583	1.8583	1.83823	2.03854	1.82938	1.79901	1.82263	1.71414	1.90032	1.75942	1.85948	1.7485	1.85533	1.41512	1.52838	1.45573	1.79315
chr7:111503911-111507160	Trim30b	1.86266	2.06279	1.84352	1.91287	1.83619	2.04691	1.80032	2.12949	1.82228	2.18952	2.24678	2.2145	1.95738	1.74804	1.89203	2.00858	1.98031	1.91708	1.79891	1.54388	1.68781	1.71411	2.04171	1.90558	0.785365	0.656143	0.705127	1.78925
chr19:12979720-12981475	Gm5512	2.0559	2.14343	2.04187	2.11944	1.64381	1.90505	1.98932	2.08445	1.10454	1.92686	0.927343	0.104625	1.09626	1.17726	2.81213	0.107375	2.0813	1.77984	2.0219	1.98173	2.10074	2.13464	2.02227	2.13535	1.945	2.4975	2.31637	1.78727
chrX:8640215-8640948	Gm5635	1.64107	0.825207	2.08659	0.714413	1.17113	2.59634	1.73302	1.37074	1.67557	1.68403	4.52706	1.87658	3.43575	2.20067	4.97859	1.37099	0.67813	0.792504	0.733906	0.885303	1.10066	0.973551	0.788531	0.807799	3.23028	1.73007	2.62741	1.78651
chr19:12284057-12284996	Olfr1431	1.09526	2.25602	1.90887	2.31176	1.99194	1.9239	2.0796	0.948226	1.95186	2.15422	2.07633	2.51356	1.70112	2.12524	2.26283	1.03711	1.69548	1.05128	2.01765	0.13518	4.36675	2.08611	0.772805	2.06819	1.55643	1.17857	0.93969	1.78541
chr7:8954256-8972357	Vmn2r37	0.684433	2.64708	1.14441	1.93662	2.86452	1.1936	0.646095	1.5945	1.76457	1.64189	2.45134	2.15146	2.57184	2.2101	2.01935	2.4634	0.917805	2.06152	1.62552	0.968629	1.27378	1.60783	1.04252	0.931734	2.62926	2.48916	2.62178	1.78351
chr12:106429254-106433609	Tcl1b3	2.91275	1.44533	2.72238	1.39051	2.20485	2.39581	1.35501	1.36962	1.32842	1.34171	1.62051	1.51941	1.20107	1.27031	1.39216	2.17205	2.31655	2.12581	1.64938	0.660366	1.71509	2.30874	2.24508	4.09702	0.675862	1.27754	1.36996	1.78086
chr7:110975036-110976442	Beta-s	1.97154	2.29014	1.95867	1.82282	2.18079	1.77771	1.9396	2.00947	1.46026	1.42224	1.63188	1.48892	1.53418	1.48771	1.22298	1.49084	2.19215	2.38899	1.8791	2.09361	2.20654	1.79378	1.69226	1.97561	1.29289	1.27219	1.56155	1.7792
chr6:130241178-130256450	Klra13-ps	1.24976	0.825619	0.552572	1.59842	1.42906	0.869075	0.625664	2.59582	1.38269	3.35164	2.62302	1.94644	2.21232	3.66207	1.5936	0.301978	1.95788	0.802598	2.75995	3.55999	1.65223	1.8095	2.76326	2.24234	0.645699	1.77122	1.21063	1.77759
chr12:88985074-88989933	Gm16381	1.70258	1.54597	1.88855	2.86053	1.32443	2.32722	1.47475	1.78691	1.49605	2.93127	1.65917	1.82568	2.05315	1.49514	2.48972	2.07407	1.53401	1.60464	1.32061	1.51306	1.49604	1.33284	1.56345	1.05118	1.80768	1.87657	1.87005	1.77427
chr5:11594955-11599480	Gm6460	1.95525	1.06755	1.01854	1.24112	1.29783	1.20748	1.44478	2.34273	1.56106	2.54107	1.03004	1.64976	1.84662	1.60096	1.35688	1.26803	1.22142	1.57567	1.64206	1.58849	1.51797	1.16522	2.61927	2.41473	3.57283	3.4199	2.54735	1.76721
chr3:113115366-113126970	Amy2a2	2.64205	2.36738	2.84347	2.67315	2.50949	2.66965	2.13119	2.37172	1.24964	1.57769	1.20903	1.133	1.18426	1.22754	1.177	1.24251	1.82269	1.94572	1.52184	1.61771	1.6971	2.16979	2.04426	1.78215	1.08285	0.899813	0.919011	1.7671
chr2:176637496-176649142	Gm14405	1.52543	1.65613	1.61781	2.22662	1.83034	1.98652	0.908669	1.90174	1.71609	1.54775	1.84785	1.81225	0.970325	1.88184	1.92458	2.27583	1.48456	2.61682	2.11479	2.08131	1.76259	1.47588	2.25107	1.87703	1.43621	1.51406	1.42202	1.76541
chr13:22864267-22865194	Vmn1r208	2.43737	2.3162	1.74166	2.27359	2.23608	2.51701	2.13395	1.81165	1.61294	2.00077	1.94219	1.88945	1.81271	2.22451	1.27348	2.67101	2.31632	1.63215	0.854792	1.08587	1.59048	1.17963	0.900415	2.32607	0.96329	1.11211	0.743162	1.76292
chr6:121956815-122035985	Mug2	1.8525	1.97945	1.95491	1.90897	2.02544	1.80979	1.96724	2.0713	1.85183	2.06144	1.92552	1.93663	1.94517	2.20952	2.05926	2.19306	1.82463	1.93802	1.07532	1.95263	1.92413	1.06066	0.167018	0.2901	1.84205	1.83981	1.84947	1.75985
chr12:11889001-11889705	Tubb2a-ps2	2.30553	0.955924	0.106716	1.85769	1.53718	1.8332	2.04167	1.75392	1.88297	2.08563	2.07819	1.52119	2.07338	2.06969	1.69034	1.51512	2.02688	1.886	2.12641	2.05761	1.85293	1.71456	1.6135	1.46605	1.87192	1.84527	1.73746	1.75952
chr10:129402791-129403754	Olfr819	1.5738	1.61271	2.01121	2.15367	1.56376	1.48973	2.09624	1.95792	1.65503	1.71487	2.6086	1.90236	1.59852	1.92405	1.63738	1.54629	0	1.83636	2.38534	1.30371	1.64765	1.52939	1.64566	1.81229	2.16206	2.19352	1.91378	1.75837
chr8:37279117-37312570	Lonrf1	1.76925	1.88684	1.87234	1.84041	1.73743	1.01138	1.81476	1.80415	1.80836	1.73578	1.80133	1.82089	1.85056	1.66982	1.81909	1.81452	1.80848	1.86053	1.74006	1.81038	1.80104	1.80262	1.81888	1.82622	1.65969	1.60562	1.64871	1.75701
chr11:48798830-48805756	Tgtp2	1.55648	1.89729	1.52536	2.30887	0.85531	1.50717	1.52245	1.70606	0.813887	1.36716	1.43826	1.50428	1.38002	0.668557	0.823509	1.16234	2.23284	2.26441	2.53518	1.00562	2.4164	2.48672	2.57537	2.49204	2.43643	2.50673	2.3755	1.75423
chr11:48798830-48805748	Tgtp1	1.55542	1.89727	1.52446	2.30891	0.856105	1.50512	1.52301	1.70601	0.812259	1.3667	1.43856	1.50235	1.3795	0.668153	0.823639	1.16319	2.23306	2.26448	2.53553	1.00545	2.41665	2.48666	2.57571	2.49202	2.43747	2.50594	2.37587	1.75406
chr17:35576111-35580715	H2-Q9	1.40702	1.22279	1.99937	4.21855	0.435514	0.371245	3.29617	0.267438	0.388638	1.62411	0.745522	0.535136	1.1416	0.572372	2.79718	0.590474	1.99755	2.34794	1.91606	1.29104	2.25721	1.30102	3.10307	5.13633	2.16799	2.05151	2.13911	1.75267
chr17:35576099-35580718	H2-Q7	1.40531	1.22231	1.99937	4.22077	0.434629	0.37011	3.29414	0.266644	0.387959	1.62232	0.74467	0.533549	1.14022	0.571074	2.7951	0.589276	1.99798	2.34727	1.91596	1.28993	2.25614	1.30155	3.10264	5.13345	2.16778	2.05196	2.13909	1.7519
chr5:147367711-147370491	Gm3402	2.00219	2.41738	1.37644	0.916599	3.04538	1.44353	2.5662	2.14593	2.14707	2.73054	1.76092	1.70938	1.88954	1.75323	1.27897	1.15003	1.19123	1.40165	0.627643	1.33149	1.06363	1.27188	2.26527	1.40435	1.89686	2.36761	2.14457	1.75183
chr10:128623539-128624475	Olfr773	2.01503	1.66609	1.53928	1.62735	1.63261	1.95216	1.53399	1.54154	1.21798	1.9336	1.8576	1.18582	1.90353	0.449475	2.0212	1.91957	2.27659	1.80789	1.57763	2.22119	1.93585	1.99901	1.66779	2.41322	1.58791	1.8064	2.00167	1.75155
chr19:12133298-12134240	Olfr1424	0.227366	0.202752	2.39866	1.15365	1.84671	1.73151	1.20616	0.213419	1.97642	2.14262	2.14859	1.95863	2.19931	2.59814	1.8313	2.47202	2.36324	1.98123	1.12795	2.00594	1.95828	2.05511	2.40671	0.129569	2.30213	2.51185	2.12062	1.75074
chr15:77529318-77549718	Apol7b	1.90003	1.89608	1.94416	1.94358	1.85073	1.82069	1.70554	1.83608	1.70467	1.53022	0.47856	1.06851	1.29591	2.3502	1.65622	1.48529	1.97133	2.17283	1.63298	1.96736	2.53043	1.2235	1.6196	1.77666	2.02692	1.93063	1.94566	1.75053
chr5:147367688-147370491	Gm3415	2.00028	2.41735	1.37159	0.911505	3.04249	1.44011	2.56762	2.14631	2.14392	2.72745	1.75653	1.70744	1.88436	1.74228	1.27303	1.14562	1.18912	1.40173	0.625896	1.32963	1.06127	1.26775	2.25975	1.39901	1.89554	2.36534	2.14566	1.74884
chr9:19517272-19518202	Olfr857	1.62825	1.53017	1.38236	1.57199	2.11841	1.78808	2.19163	1.14693	1.13575	0.804435	1.61273	0.528598	0.0491637	1.70629	1.74652	1.13066	2.14879	2.47092	2.36404	1.94385	2.46198	2.46834	2.56802	2.41036	1.50309	2.45505	2.31571	1.74749
chr2:85487519-85488476	Olfr1002	2.15328	1.57529	2.07598	1.92473	1.9351	1.80666	1.53725	2.15641	1.54282	1.68101	2.56135	2.081	1.72413	1.77561	1.80224	1.89578	1.66692	1.61441	1.84457	1.57853	1.67575	1.35755	1.64024	1.75399	1.34863	1.00854	1.44169	1.74665
chr11:114903444-114909609	Cd300lh	1.57788	1.61335	2.05092	1.78831	1.85857	1.38671	1.84383	1.18002	2.39061	1.37904	1.62839	2.12004	1.69541	2.17666	1.78312	1.67631	1.5249	2.47386	1.86544	3.50726	1.73209	1.25673	1.91164	2.04088	0.836071	0.910721	0.935178	1.74607
chr4:60149719-60152729	Mup2	1.2626	1.49456	0.863713	1.28643	1.50876	1.723	1.20764	1.85327	0.876931	1.30484	0.641815	1.00535	0.727756	0.67529	0.633444	0.671434	2.45562	3.52056	4.92453	1.22782	2.44466	2.04956	4.35962	1.82739	2.2274	2.17284	2.13778	1.74387
chr8:22234649-22235729	Gm14851	2.69356	2.63652	1.28797	2.76091	2.12451	1.58961	2.98201	1.51164	2.91886	1.69199	2.55674	2.75834	2.47587	2.13708	1.06838	1.49927	1.34993	0.799346	0	2.10287	1.06724	2.20211	1.94858	1.89161	0.0109056	0.133703	0.82218	1.74155
chr4:122366501-122382378	9530002B09Rik	2.05187	1.19063	2.0466	1.20143	2.16515	0.315623	2.16001	2.1721	1.15815	2.1024	1.15855	2.13707	0.264068	2.27621	1.19426	0.263877	2.09399	2.0469	2.03361	2.05529	2.0842	2.05525	2.1866	2.15127	2.12869	2.24338	1.99217	1.73812
chr11:49283555-49284683	Olfr1386	1.32233	0.188442	0.1642	1.99044	1.99644	0.114237	1.18766	1.24548	1.03474	2.0362	2.10501	1.33049	0.908782	1.17928	0.969574	3.02794	2.04146	2.09511	1.97728	2.209	2.14091	2.14218	2.37021	4.16216	2.29736	2.34111	2.31641	1.73683
chr3:113084762-113094229	Amy2a5	2.63429	2.32537	2.78401	2.45059	2.49145	2.46909	2.0018	2.21008	1.05305	1.51133	1.26554	1.15244	1.05096	1.18953	1.17862	1.13556	1.8307	1.93822	1.61247	1.62592	1.70231	2.32153	2.09116	1.9081	1.00758	1.01571	0.879584	1.7347
chr16:36184297-36188196	Gm5483	1.94059	2.14932	2.05256	1.94715	1.90122	2.16412	1.85884	1.96998	1.57207	1.81119	0.902176	1.74474	1.67196	1.94504	0.97036	1.84674	1.53597	1.72397	1.71663	1.41763	1.60959	1.5746	1.71668	1.63126	1.85245	1.98648	1.59319	1.73357
chr7:111681472-111683875	Trim30e-ps1	2.18078	2.3734	2.31921	2.16205	2.18867	2.17192	2.11544	2.22378	2.04485	2.15694	1.95583	2.35616	2.01792	2.02555	2.05323	2.29228	0.00338103	1.99871	2.15329	1.16777	2.28472	1.17396	1.20118	2.02269	0.0419338	0.0185687	0.0403109	1.73128
chr4:136957468-136965706	Gm13011	1.73507	1.67564	1.68861	2.27123	1.55912	1.5301	1.53699	1.6466	1.68797	1.76515	1.7855	2.16138	1.70975	2.49335	1.82163	2.29524	1.67458	1.67639	1.7305	1.64421	1.62824	1.93758	1.62763	1.71954	1.16583	1.27397	1.1535	1.72575
chr3:113117374-113126832	Amy2a5	2.52865	2.2915	2.72604	2.66177	2.50614	2.61894	2.08402	2.2663	1.19553	1.5403	1.16311	1.0901	1.09564	1.17371	1.15078	1.21	1.84802	1.93488	1.51729	1.59973	1.67665	2.15371	2.01191	1.73905	1.06222	0.860991	0.862268	1.72479
chr13:13275048-13284107	Prl2c5	2.24115	0.00405537	2.13601	3.2328	0.00720606	5.21327	0.022628	0.0152136	2.04483	1.12902	2.23227	1.11159	2.17617	2.20488	1.05006	2.00208	1.01928	2.09823	2.02472	2.07501	1.02841	1.01067	2.0915	0.00434311	2.10938	2.03523	4.22164	1.72376
chr7:21629116-21630004	Vmn1r115	0.995594	1.72327	2.50345	1.10521	0.955116	2.27623	1.64596	1.62184	3.49898	1.09099	1.62061	4.87793	0.824632	4.30406	1.07032	0.861961	0.036294	1.93652	0.688283	1.52572	1.3061	1.82483	1.65517	1.94923	0.339352	3.06713	1.2357	1.72372
chr6:129716664-129725867	Gm156	1.6646	1.67426	1.65286	1.50433	1.91079	1.39494	2.01493	1.74761	1.82884	1.71297	1.97268	1.90676	1.90989	1.88853	1.89269	1.63961	1.40734	1.17598	1.88996	0.848608	1.76817	1.79738	1.85986	2.10087	2.00328	1.64797	1.68508	1.72225
chr7:9080031-9103001	Vmn2r38	0.865838	2.18344	1.23729	1.72762	2.30528	1.30439	0.895284	1.71343	1.63868	1.91023	1.52971	1.52669	2.08591	2.05144	1.29214	1.48885	1.43238	2.18501	1.71326	1.45242	1.63253	1.76657	1.49336	1.47721	2.46988	2.56438	2.51745	1.72077
chrX:150544175-150555228	4921511M17Rik	1.74793	1.78537	1.47837	1.54626	1.72508	1.5066	1.59346	1.55788	1.84475	2.33513	1.90125	1.36836	1.61744	1.98101	1.63324	1.89134	1.54412	1.2874	2.01191	1.76526	1.72324	1.40016	1.93499	1.73271	2.10955	1.24312	2.18007	1.72022
chr7:115355096-115356041	Olfr487	1.04368	2.21011	2.01944	2.19375	2.06876	1.99208	2.40393	2.13248	2.07225	1.21616	1.27858	2.72254	2.9405	2.92702	2.37467	1.24082	1.92137	0.820027	2.161	1.39385	0.817868	3.11114	1.83522	0.143109	0.0402911	0.00389469	1.33445	1.71922
chr3:113052095-113061617	Amy2a5	2.43075	2.32241	2.5658	2.47524	2.38616	2.34981	1.97059	2.24713	1.06747	1.48536	1.23056	1.16849	1.09895	1.21906	1.18867	1.12595	1.94018	2.05277	1.66011	1.69272	1.64815	2.24505	2.01192	1.86383	0.916788	1.04816	0.989625	1.71858
chr3:113147966-113159576	Amy2a2	2.63901	2.17978	2.78383	2.59295	2.3975	2.42119	2.07517	2.19577	1.09307	1.54944	1.21307	1.14593	1.05562	1.18461	1.14179	1.12268	1.8211	1.81885	1.51483	1.59443	1.70288	2.23332	2.15601	1.77645	0.939309	0.99447	1.02033	1.71716
chr13:33576658-33587869	Serpinb9g	2.08043	2.04064	2.03758	1.96761	1.99577	1.64316	2.00022	1.95144	1.10431	1.05325	1.08979	1.13956	1.10921	1.2588	1.07289	1.11445	2.00044	2.07298	2.18852	2.06123	2.03854	2.10269	2.15225	2.10221	1.68061	1.61995	1.63078	1.71516
chr8:22465566-22466699	Defa-rs1	2.04955	1.0923	2.02051	1.01495	0.105257	2.29724	2.39918	2.3035	1.13413	2.13528	1.48693	1.343	0.345195	2.44259	2.1142	1.49551	1.00616	2.10654	2.19428	2.00505	1.99175	2.07819	2.17162	0.916011	1.86874	1.98557	2.15489	1.71326
chr8:22204716-22205680	Gm10104	2.04131	2.72634	1.417	2.62989	1.93724	2.33498	1.92417	1.22629	2.93363	1.718	2.02313	2.18946	2.2316	2.11071	1.77816	1.25314	1.60962	1.05607	0.272123	2.21654	1.419	2.4396	1.69487	2.14228	0.220883	0.341586	0.305254	1.71085
chr5:138478451-138491861	Smok3b	1.37881	1.69945	1.64694	1.72134	1.77938	1.31242	1.34208	1.45229	2.93463	1.86254	2.35571	1.90261	1.60102	3.05549	2.01682	2.03172	1.42441	1.46931	2.10379	1.30996	1.41229	1.56004	1.44284	1.39593	1.18269	1.46359	1.33217	1.71075
chr1:155350145-155396844	Npl	1.71321	1.69783	1.69762	1.71894	1.73548	1.82917	1.69246	1.70233	1.77317	1.76313	1.73003	1.71643	1.73847	1.79284	1.78771	1.78767	1.71504	1.68124	1.74655	1.67798	1.63538	1.67963	1.75526	1.69636	1.57809	1.5294	1.53256	1.70755
chr4:113835988-113917633	Skint11	2.39255	2.07732	1.59046	1.90501	2.45388	1.9515	2.37397	2.37848	1.32587	1.32978	1.31792	1.27521	1.69507	1.55446	1.4422	1.3166	2.41957	1.26288	1.97163	1.70345	1.80911	1.78432	1.81416	2.22032	1.01516	0.843439	0.829865	1.70571
chr7:54590244-54609610	Mrgpra1	1.80795	1.83529	1.84383	1.82773	1.92331	1.67284	1.79261	1.90708	1.69268	1.26897	1.72866	1.95388	1.6376	1.67031	1.44978	1.99731	1.81864	1.78903	1.92935	1.34603	1.30184	1.30102	1.649	1.88666	1.56297	1.67659	1.76393	1.705
chr14:59863277-59879053	Gm6904	1.77914	1.85308	1.83661	1.84555	1.77498	1.80806	1.81964	1.87906	1.34109	1.21532	1.22182	0.909753	1.13012	1.35942	1.22979	0.681201	2.0278	2.0535	1.96733	2.03436	2.00297	2.01894	2.07016	2.00895	1.95459	2.1525	2.05416	1.70481
chr6:41392212-41396096	Gm10334	1.29327	1.81413	0.698969	0.614826	0.978878	1.34574	1.33974	1.11952	1.89554	1.72547	1.81762	0.677533	2.08297	1.50771	2.20752	3.44441	2.13749	2.69722	1.91624	2.57287	2.45544	0.436931	0.990034	2.38796	1.86018	1.99519	1.94575	1.70219
chr4:60079340-60083347	Mup7	1.779	1.72932	1.55706	2.14086	2.05024	1.74585	1.43918	2.31532	1.09639	1.71798	0.770334	1.09153	1.25392	1.18169	0.674728	1.07332	2.58397	2.23999	2.60423	1.30196	1.8411	1.99804	2.43372	1.54079	1.85732	1.81323	2.08575	1.70062
chr9:88490162-88494081	9430037G07Rik	1.99523	1.17879	0.752908	0.678972	0.264787	2.60138	1.10756	2.2956	1.99134	2.43011	3.76988	1.49262	1.72878	2.91298	2.78747	3.3948	0.321567	1.37076	1.59564	1.1159	2.52117	0.212477	1.2669	0.225622	1.84979	1.73229	2.29019	1.69946
chr11:48759651-48792883	9930111J21Rik1	1.71165	1.1527	0.150144	2.265	1.26371	0.187465	1.68961	1.75855	1.32498	1.70314	1.58913	1.6415	1.70661	1.58036	1.18952	1.55258	2.23051	2.17424	2.26909	1.24981	2.22099	2.16036	2.2057	2.19815	2.31904	2.07982	2.28806	1.69861
chr14:50654065-50655175	Olfr725	1.7118	1.49439	1.57718	1.66639	1.43512	1.69078	1.48368	1.76218	1.81901	1.33609	2.2307	1.1909	1.96047	1.77128	1.73292	1.75727	1.73734	1.7211	1.72655	1.65905	1.58045	1.91558	2.1369	1.6557	1.65324	1.59498	1.84833	1.69813
chr7:3859881-3867103	Lilra6	3.99302	2.33107	1.33055	1.39495	0.382721	2.1915	2.40966	1.5227	3.19258	2.07759	1.30854	2.94355	1.8514	3.25917	0.432417	2.16553	2.92871	1.20537	0.344446	2.66844	0.408713	1.56264	2.53818	0.438807	0.293749	0.306022	0.309363	1.69598
chr2:111289298-111290216	Olfr1287	0	2.36334	1.14449	0.00808478	0	1.25911	0.0341939	0.0082807	2.28932	2.14058	2.3393	2.00016	2.26308	2.00896	2.0202	2.02881	2.0732	2.13693	2.35699	2.40644	1.90834	2.2533	2.45504	1.9391	2.07016	2.09585	2.15483	1.69474
chr9:88851757-88857254	Bcl2a1a	0.555787	2.14126	1.35771	1.31182	2.41322	0.811269	1.33056	1.31541	2.44489	3.27819	0.357464	1.26658	1.11589	2.71441	1.28939	1.36921	2.13631	2.20983	2.0587	2.06773	1.29529	2.20563	2.20163	2.10937	1.11866	1.07547	2.19594	1.69436
chrX:35053618-35057977	Rhox2g	2.54237	3.40769	3.64058	1.2243	1.18755	2.01269	1.21309	2.28323	1.50742	1.20277	1.10979	1.55585	0.435977	1.11363	1.35133	1.24376	1.32541	2.74705	1.38657	1.09938	1.19139	0.926406	1.01193	1.95692	2.78715	1.40088	2.8755	1.6941
chrX:150457322-150468370	4921511M17Rik	1.66517	1.65407	1.40011	1.42879	1.60733	1.49004	1.54474	1.55025	1.70518	2.28595	1.7663	1.36075	1.58063	1.85343	1.67277	1.89364	1.49991	1.20881	1.96469	1.69744	1.69936	1.51723	2.15401	1.78145	2.26403	1.23452	2.20754	1.69215
chrX:150457322-150468372	Gm10057	1.66521	1.65406	1.40007	1.42883	1.60734	1.49016	1.54478	1.55029	1.70513	2.28596	1.76629	1.36081	1.58063	1.85338	1.67279	1.89367	1.49991	1.20887	1.96467	1.69741	1.69928	1.51722	2.15395	1.78141	2.26397	1.23445	2.20753	1.69215
chr1:65973095-65974878	Crygf	1.97736	1.63644	1.72825	1.69996	2.17454	1.6016	1.47437	1.73607	1.60189	1.92062	1.63672	1.70845	1.74842	1.56045	1.77514	1.82716	1.57817	1.67195	1.65914	1.80003	1.63274	1.59329	1.80025	1.81721	1.38098	1.43837	1.48657	1.69134
chr2:85847934-85848867	Olfr1032	2.0048	1.36765	1.61248	1.84001	1.57149	1.65822	1.53099	1.3556	1.71554	1.824	1.957	1.96204	1.74969	1.76367	1.66228	1.79786	1.8514	1.44497	1.78558	2.12912	1.6268	1.31027	1.61032	1.42332	1.82233	1.49717	1.70863	1.68827
chr7:17234378-17242827	Ceacam-ps1	1.06912	1.01273	1.14263	1.08492	2.09206	0.997051	3.19273	2.02998	2.20482	2.20235	1.95001	2.14167	2.10479	2.31064	2.21094	2.02766	2.05502	3.09856	0.032446	0.0190765	4.22187	2.03393	2.14688	2.12962	0.0329771	0.0135879	0.018851	1.68803
chr6:130219211-130231946	Klra10	1.48791	1.75844	1.22895	2.29985	1.73167	1.06839	1.40413	1.54511	1.66707	2.45561	2.5381	1.69047	1.95328	1.76136	1.78618	0.678463	1.82764	1.03197	2.28589	1.73471	1.61436	1.038	1.76932	1.6343	1.36743	2.42508	1.79121	1.68796
chr2:168056121-168057803	Mocs3	1.90994	2.00254	1.71064	1.95396	1.62755	2.04042	1.51416	1.40844	1.6811	1.66251	1.47188	1.50772	1.70022	1.63758	1.89255	1.75788	1.57533	1.50654	1.71342	1.70725	1.81718	1.44795	1.67975	1.73159	1.58398	1.71234	1.61792	1.68786
chrX:35061007-35065834	Rhox4g	2.03437	3.87089	3.81281	1.10973	1.2336	2.23061	1.19363	2.32746	1.40198	1.52728	1.23363	1.44309	1.53047	1.40268	1.80087	1.38841	1.38679	1.91718	1.07193	0.98879	1.16933	0.772828	1.01535	1.33154	2.41351	1.24588	2.63543	1.68482
chr2:150043834-150070610	Zfp937	2.7193	2.7784	2.92125	2.48961	2.36262	2.57651	2.62215	2.41957	2.17759	2.64995	2.20898	2.26902	2.16907	2.40408	2.15996	2.34106	2.12673	0.106386	1.01651	0.0833047	1.22727	0.0855766	0.18022	0.0925495	1.1154	0.079606	0.092145	1.68425
chr17:35479277-35482667	H2-Q2	2.31833	2.3584	0.5969	0.619925	0.91474	0.848323	1.42542	0.963605	1.83096	2.7964	0.71302	0.974701	0.457777	0.453467	2.86528	1.18063	0.768502	2.70434	2.94758	1.45323	2.03604	4.70668	0.803254	1.08521	2.44237	2.54301	2.63441	1.68306
chrX:150436132-150447185	Gm10057	1.78097	1.67868	1.49431	1.48191	1.62652	1.44865	1.53521	1.53086	1.82585	2.39886	1.85781	1.28671	1.45581	1.83007	1.72803	1.87118	1.47489	1.25778	1.83102	1.72826	1.651	1.39378	1.89422	1.55478	2.17909	1.27675	2.28263	1.67984
chrX:150436132-150447183	4921511M17Rik	1.78091	1.67873	1.49434	1.48187	1.62662	1.44868	1.53515	1.53083	1.82585	2.39902	1.85783	1.28664	1.4559	1.83014	1.72805	1.87112	1.47482	1.25784	1.83096	1.72832	1.65086	1.39378	1.89407	1.55476	2.17891	1.2768	2.28275	1.67984
chr17:23080150-23095781	Vmn2r113	2.08625	2.10325	2.09152	1.86533	1.18588	1.40319	1.6813	1.17629	1.23629	0.792477	1.93953	1.27244	1.3403	1.98693	2.50323	2.10719	1.81741	1.37592	0.686631	2.02376	1.14484	2.10325	1.96847	1.35622	2.00362	2.23361	1.86558	1.67966
chr7:20818256-20819177	Gm4498	1.09528	1.24641	1.54779	0.576664	0.840944	1.82428	1.74863	1.14388	2.83412	0.870582	0.521777	2.86878	2.06695	4.14926	0.901865	0.983804	0.0323002	1.43785	4.46416	0.761429	2.76367	0.886959	1.37537	4.07215	0.800289	2.24422	1.26167	1.67856
chr17:34118436-34122303	AA388235	1.58356	1.91888	1.56929	1.50801	1.41355	1.56245	1.77961	1.67675	3.16665	1.39578	1.61302	2.14542	2.12661	2.20934	1.46988	1.56326	1.62379	1.66116	1.22738	1.67981	1.70749	1.74118	1.60404	2.64948	0.843203	0.972413	0.854093	1.67652
chr17:35531043-35532575	H2-Q5	1.00908	0.566784	0.459548	2.4569	1.134	0.372244	1.85363	0.319479	1.60255	2.94495	2.94147	2.04763	1.3317	1.28264	2.35813	1.86417	0.220183	2.60726	2.53547	1.71954	0.852748	1.86985	0.645399	3.19902	2.09866	2.32012	2.61344	1.67506
chr12:105133135-105143160	Serpina1c	1.7608	1.59644	1.4571	1.06417	1.6237	1.60499	1.57472	1.75548	1.35189	0.67934	1.94247	1.46469	1.92813	1.66441	2.35325	2.57382	1.69021	1.71947	1.73377	1.84628	1.83253	1.80375	1.73187	1.67351	1.50962	1.58193	1.66399	1.67342
chr3:113149974-113159438	Amy2a5	2.48866	2.07192	2.75556	2.49684	2.32784	2.36556	2.0055	2.1063	1.04615	1.51095	1.15561	1.11306	1.01096	1.11032	1.07288	1.12429	1.8228	1.73083	1.53375	1.59977	1.66338	2.22103	2.16142	1.75249	0.936623	0.962012	1.01489	1.67264
chr14:6727191-6737109	Gm3383	1.14933	1.40411	1.34234	1.11007	1.33304	1.08633	1.19697	1.26334	0.867689	1.86514	2.01664	1.8479	1.6121	1.33827	2.07071	2.34339	1.74384	1.34901	1.61242	1.99022	1.44081	1.69889	1.9215	2.16341	2.25302	2.46424	2.53597	1.66743
chr5:105644717-105668552	Gbp10	2.21872	2.02158	1.40985	1.95322	2.38467	1.35927	2.25881	2.10667	1.44413	0.386112	0.464483	0.528451	2.17691	1.30302	0.476511	1.17962	1.30324	1.22077	2.03287	2.12943	2.14509	2.25059	2.04804	1.97309	1.99169	2.07573	2.08569	1.66401
chr11:48779318-48792900	9930111J21Rik2	1.58267	1.11022	0.127665	2.15319	1.19062	0.209388	1.65794	1.6282	1.19024	1.70582	1.52107	1.47283	1.48607	1.3106	1.19776	1.61439	2.2189	2.20788	2.30742	1.20206	2.33803	2.23223	2.24913	2.11419	2.30308	2.23113	2.33969	1.66305
chr11:68735336-68740583	Odf4	1.73274	1.73682	1.55015	2.00512	1.73864	1.76335	1.68965	1.73165	1.64728	1.74239	1.67243	1.63388	1.76976	1.78028	1.63251	1.64677	1.54343	1.69192	1.76021	1.68683	1.63569	1.60447	1.70625	1.52303	1.3143	1.52219	1.41	1.66192
chr15:79722837-79738859	Apobec3	1.5477	1.94155	1.78126	1.69966	1.69038	1.82882	1.63008	1.81383	1.78015	1.79338	1.72149	1.55494	1.67429	1.75787	2.01958	1.68708	1.59237	1.699	1.64542	1.67702	1.6557	1.61252	1.68282	1.67225	1.24351	1.19703	1.23076	1.66039
chr7:115315311-115316256	Olfr486	1.0537	2.25218	2.08346	2.04905	1.93764	2.05193	2.3024	1.8921	1.70228	1.92243	1.2321	2.12293	2.03987	3.02806	2.13464	1.17059	2.44636	1.13534	1.93349	1.17636	1.05943	2.08925	2.60937	0.0245698	0.0512492	0.0398843	1.25115	1.65896
chr16:59215510-59216437	Olfr199	2.02682	1.13129	2.21704	2.03071	2.25498	1.87723	1.00145	2.01745	2.22253	1.97664	2.04542	2.18602	1.83954	2.13854	2.01036	2.12203	0.883826	0	0	0.0174655	1.90294	1.88192	1.88351	0.984928	2.08986	1.60945	2.42608	1.65845
chr14:3500848-3668655	Gm5795	1.12469	2.3314	2.92594	1.1123	1.65946	1.3765	1.70808	1.35054	0.400207	1.50284	1.51975	1.0763	0.809163	0.858776	1.33825	1.60245	1.27951	1.20929	1.83229	1.58714	1.56944	1.9793	1.98949	2.17354	2.77075	2.83264	2.84727	1.65805
chr11:48851161-48864744	9930111J21Rik2	1.69721	1.1947	0.13653	2.22854	1.34159	0.241513	1.50735	1.7156	1.14436	1.75468	1.66832	1.84611	1.80327	1.3113	1.22085	1.85674	2.09038	2.13699	2.01256	1.01802	2.13513	2.09478	2.08085	2.15054	2.01071	2.20501	2.12949	1.65678
chr5:94806364-94813359	AA792892	1.61721	1.01597	0.77629	1.70395	4.05002	2.84918	4.95618	1.72045	1.58094	1.83276	1.92474	0.306679	0.246477	1.22909	0.575339	1.76193	0.0301868	1.0387	0.996341	0.177032	2.0489	1.09611	1.02347	0.192617	3.77035	4.02025	2.15875	1.65555
chr11:68715067-68718036	Rpl26	1.57963	1.89048	1.87543	1.91056	1.58199	1.99739	1.71723	1.67435	1.63432	1.41672	1.67367	1.74882	1.82936	1.39256	1.6224	1.99888	1.67277	1.73392	1.73702	1.88843	1.91907	1.64272	1.46429	1.57239	1.13987	1.23961	1.12122	1.65463
chr5:109983727-109988012	Crlf2	1.63182	1.73586	1.758	1.73075	1.29562	2.05188	1.59033	1.63754	1.74178	1.77913	1.55202	1.68927	1.64931	1.54084	1.80798	1.56246	1.6493	1.5378	1.50756	1.61533	1.67189	1.63175	1.62428	1.60885	1.60441	1.76291	1.66239	1.653
chrX:3546313-3547091	Gm14354	1.36752	0.844982	1.96435	0.888369	2.16828	2.95939	2.4067	1.90593	0.397913	1.13303	1.4196	0.489934	0.873213	2.99499	1.51144	0.659023	1.57234	1.10622	0.227623	1.66904	1.55872	1.51078	1.73228	1.98137	3.7171	1.64608	3.89353	1.65184
chr11:68715090-68718036	Gm15772	1.57236	1.88904	1.87359	1.9053	1.57873	1.99224	1.71609	1.67535	1.63083	1.41409	1.6706	1.74352	1.83001	1.38634	1.61306	1.99901	1.67329	1.72862	1.73934	1.88948	1.91878	1.63998	1.46044	1.56838	1.13391	1.23357	1.11689	1.65159
chr4:73562631-73566664	Gm11756	2.31023	1.81148	1.72779	1.68725	0.775623	2.90958	0.795887	1.95141	1.58844	1.80272	1.82102	1.58224	1.47932	2.23522	1.24452	1.8744	1.45438	1.54443	1.79185	1.43912	1.48716	1.09461	1.43439	1.12444	1.82342	1.88179	1.85701	1.64925
chr2:87708149-87709082	Olfr1152	2.07525	2.20598	2.20677	1.75631	1.87053	1.98401	2.09275	2.20213	1.24896	1.26874	1.34338	2.25603	1.36361	0.663092	0.727552	0.700074	1.80445	1.87973	1.45193	0.456662	2.27966	1.30788	0.52132	2.26104	2.34899	1.74851	2.47537	1.64817
chr6:41408928-41413785	Prss1	1.45091	1.51911	1.02303	0.737929	0.983346	1.42773	1.18883	1.35905	1.66241	1.70898	1.9659	0.613764	1.6064	1.41579	2.42945	2.57649	2.42154	2.97908	1.19808	2.12442	2.19334	1.09107	1.15736	1.93024	2.138	1.6454	1.952	1.64814
chr9:78078475-78090490	Gsta1	0.962668	2.11778	2.74958	1.54531	3.06687	1.57946	1.83902	1.82704	1.79922	2.91835	0.964373	1.78104	0.92404	1.32115	0.992672	2.58391	1.18172	1.94884	1.479	1.36017	1.45862	2.37448	1.49517	1.02132	1.09104	0.991584	0.988389	1.64307
chr2:122292318-122293533	Bambi-ps1	0.990152	2.13826	0	1.05912	0.84487	1.85858	0.99	0	0.955218	0.904124	1.84509	1.94256	2.23162	1.34383	1.88692	1.113	2.03437	1.94548	3.08822	2.15822	2.04581	2.25263	2.03878	2.0225	2.22401	2.05717	2.35359	1.64163
chrX:121240947-121249519	Vmn2r121	1.43931	1.53656	1.41004	1.5087	1.53792	1.42139	1.51381	1.67543	1.57536	2.0192	1.67233	1.61912	1.92321	1.53476	1.59336	1.54139	1.86199	1.59859	1.8269	1.78406	1.66369	1.48918	1.47683	1.65053	2.03437	1.27359	2.12547	1.641
chr4:73547814-73551857	Gm11758	2.80767	2.27087	1.79474	1.4859	1.60344	3.31362	1.4971	1.81208	1.40484	1.77107	1.55393	1.15831	0.914219	2.44912	1.45112	1.70872	1.22642	1.39894	1.7779	1.01718	1.31446	0.836346	1.43392	0.747695	1.78921	1.99397	1.75463	1.64027
chr4:73547810-73551857	Gm11757	2.80742	2.27023	1.79404	1.48521	1.60255	3.31172	1.49635	1.81238	1.40521	1.76982	1.55299	1.15799	0.914157	2.44826	1.4504	1.7079	1.22609	1.3985	1.77781	1.0175	1.31448	0.836211	1.43371	0.74764	1.78836	1.99301	1.75376	1.63977
chr4:73547809-73551857	Gm13871	2.80736	2.27007	1.79387	1.48504	1.60233	3.31125	1.49617	1.81245	1.4053	1.76951	1.55275	1.15791	0.914142	2.44804	1.45021	1.70769	1.22601	1.39839	1.77779	1.01758	1.31448	0.836177	1.43366	0.747626	1.78815	1.99277	1.75354	1.63964
chr13:67964262-67964860	BC048507	1.16224	1.86509	1.61588	1.39966	1.72075	1.4838	1.76703	1.54776	1.49327	1.75195	1.84353	1.59685	1.07712	1.7288	1.46708	1.57911	1.78052	1.81137	1.74193	1.67554	1.4143	1.64063	1.56343	1.49607	2.07629	2.1797	1.72534	1.63722
chr15:74938590-74942379	Ly6c2	1.91359	1.81447	1.57993	2.23724	1.82551	1.73863	1.70017	1.99497	1.0545	1.82915	1.29517	1.90279	1.04523	0.942547	0.495976	0.251453	1.85947	1.83759	2.17819	1.94054	1.90605	1.92754	1.76809	1.09841	1.72142	1.97097	2.34769	1.6362
chr2:122310676-122353776	Gm14085	0.985395	1.77466	0.151119	0.956337	1.11027	1.83338	0.950068	0.124774	1.01039	1.49536	2.5111	1.92196	2.7192	0.957259	2.60986	1.11371	1.94683	1.96002	2.66857	1.937	1.96805	1.93587	1.96705	1.91372	1.83352	1.89952	1.90851	1.63569
chr8:22165223-22166196	Defa21	2.20369	1.92459	0.154839	1.94987	4.04123	0.323736	2.07852	0.0933037	4.49711	0.789547	2.37955	3.87881	2.42603	2.34899	0.720706	1.32324	1.22713	1.6455	1.60321	2.54685	0.977577	1.91333	1.06422	1.9834	0	0.0444879	0	1.6348
chr7:114249425-114250373	Gm10081	3.0073	0.747802	0.0975915	0.635888	0.271629	0.536789	1.38429	1.44018	2.29788	2.8215	2.07835	1.70827	1.37982	1.66914	3.0392	1.9143	1.23498	1.63973	0.151537	1.89941	2.65512	1.87787	1.6452	1.60162	2.07839	2.02674	2.28224	1.63418
chr6:123442525-123483424	Vmn2r21	2.09159	1.54854	2.17415	1.69658	2.05736	0.495985	1.24747	1.56502	1.43883	1.16551	2.72983	2.31851	1.16128	1.80045	2.62261	2.08244	1.44946	1.31201	1.73848	0.875562	0.8857	2.77791	1.75801	0.773822	1.52481	1.32616	1.47472	1.63307
chr2:85914860-85915875	Olfr1036	2.44216	1.33454	2.16624	1.84807	1.47919	1.26989	0.348093	2.63916	1.86964	2.16785	2.57137	1.30668	1.33604	2.45943	1.29423	0.406023	1.42232	1.12992	2.3036	1.83495	1.36612	2.62077	2.36404	2.19891	1.1204	0.37222	0.30868	1.62891
chr1:175787350-175810318	Mndal	1.48223	1.31548	2.10537	2.13517	2.17172	1.40156	1.40449	1.21834	1.53247	0.38992	1.51762	1.57503	1.49845	1.17764	2.50172	1.08601	2.56707	1.29999	1.95407	2.0007	1.30611	2.32452	1.4201	1.45415	1.75338	1.61557	1.70377	1.62639
chr4:60510884-60514832	Mup1	1.70084	1.6487	1.44486	1.71285	1.8109	1.61909	0.936911	1.56559	0.665795	0.895886	0.587115	0.594423	0.665827	0.813537	0.632171	1.03064	2.1394	3.18169	4.25028	0.626718	1.39789	1.52614	3.87374	1.29352	2.48707	2.17422	2.46318	1.61996
chr14:3740251-3906698	Gm5795	1.09803	2.29727	2.9277	1.07647	1.64473	1.35078	1.67146	1.29885	0.391424	1.46188	1.51667	1.05276	0.808186	0.809163	1.32186	1.54351	1.25989	1.1746	1.83535	1.51942	1.51652	1.94547	1.97645	2.14636	2.61905	2.71542	2.70354	1.61788
chr2:89470096-89471053	Olfr1249	1.9136	1.95483	1.71675	1.88323	1.60315	1.67033	1.77251	1.95301	1.75309	2.64072	1.44826	1.92015	1.89157	1.91831	2.09457	1.24006	1.68147	1.61623	1.3177	1.82803	1.71271	0.560246	1.77175	0.742261	1.27296	0.718476	1.06128	1.61694
chr12:104680376-104681890	Ifi27l2a	1.01604	0.0357702	1.14948	0.0282809	0.0406677	1.12305	0	1.2169	2.12984	2.20734	2.15889	2.03437	2.20187	1.59382	2.01062	2.01154	2.60276	2.48862	2.04224	2.18418	2.17997	1.13493	2.09184	1.19791	2.65273	2.24924	1.83135	1.61534
chr14:5923635-5933553	Gm3383	1.08031	1.46737	1.28428	0.976594	1.39243	1.0476	1.044	1.2444	0.909795	1.77102	1.95361	1.7702	1.63483	1.36599	2.03815	2.13792	1.56263	1.21978	1.41732	1.99895	1.42892	1.65857	1.95007	2.07114	2.41318	2.50949	2.246	1.61461
chr8:107391323-107397982	Ces2d-ps	2.37789	2.15783	2.12608	2.23196	2.20116	1.39833	2.49316	1.97743	1.03231	1.10235	0.159093	0.637423	1.09989	0.785086	0.626477	0.789859	2.0892	2.12915	2.08779	1.96606	0.990265	1.03986	1.56366	2.0483	2.1081	2.26737	2.10643	1.61454
chr7:54844319-54856742	Mrgpra3	3.60131	3.04871	0.555563	0.553386	0.257705	2.64431	2.70968	1.43052	1.33659	2.06877	1.71336	1.72367	1.46453	2.42025	1.43652	1.48109	2.70065	2.5959	0.862489	1.95333	1.96019	1.87386	1.45186	0.899524	0.248681	0.282565	0.304055	1.61404
chr7:5495798-5496701	Vmn1r60	2.27275	2.04372	1.83724	1.88624	2.05118	2.39965	1.85026	2.1604	2.24066	2.18582	2.06637	2.36186	1.91556	2.14685	2.07992	2.10354	0.0406837	1.22959	1.84082	0.0209646	2.3489	1.97898	2.22871	0.0133439	0.038531	0.0793817	0.0935732	1.61169
chr17:24017842-24019820	Dcpp1	1.70344	1.54186	1.8763	1.57057	1.74181	1.69928	1.58632	1.45491	1.83954	1.55068	1.53475	1.5412	1.82481	1.63117	1.54087	2.05347	1.66444	1.71322	1.72445	1.71355	1.6346	1.52351	1.58767	1.72445	1.34651	0.976413	1.01479	1.60424
chrX:70420640-70422328	4930408F14Rik	1.7118	1.23263	1.52442	1.34219	1.44513	1.94926	1.51835	1.29136	1.57932	2.24767	1.90729	1.64304	2.37447	1.44234	1.80137	2.24798	1.30685	1.2556	1.15287	1.17106	1.29673	1.24874	1.33864	1.00789	2.21368	1.33446	2.58866	1.59903
chr14:5731119-5754402	Gm3500	1.06616	1.37649	1.27032	1.03571	1.37614	1.01718	1.1103	1.25729	0.720458	1.88882	1.88636	1.59743	1.49301	1.02445	2.17799	2.05703	1.44547	1.23518	1.3736	2.10794	1.37264	1.66153	1.85343	2.0598	2.52885	2.62605	2.52583	1.59798
chr4:61252962-61256864	Mup17	1.71807	1.07171	0.930713	1.82191	1.14535	2.39441	1.22221	2.41255	1.16379	1.41004	1.10165	1.28318	1.22733	1.10112	1.03761	0.765637	1.0056	2.50415	1.68175	2.55438	3.35016	2.52168	2.72998	1.92553	1.10355	0.948251	1.00944	1.59784
chrX:31428919-31429697	LOC100862314	1.39195	0.732695	1.9603	0.82423	1.79693	3.53192	2.24914	2.00789	0.436904	0.846835	1.26823	0.600064	0.631592	2.01307	1.67875	0.822043	1.59811	1.1725	0.171368	1.84338	1.53345	1.6145	1.60858	1.61328	3.23327	2.19642	3.75919	1.59765
chr10:21786114-21787885	4930444G20Rik	1.28745	1.32303	1.37113	1.76971	1.31532	1.19765	1.64831	1.41906	1.4285	1.5219	1.4625	1.33898	1.79513	1.75543	1.45696	1.46767	1.83209	1.80602	1.48287	1.61045	1.34864	1.41906	2.13055	1.47782	1.96893	2.20784	2.01617	1.58738
chr7:9638310-9655801	Vmn2r45	0.276496	2.1816	0.560462	1.69221	3.31322	0.900263	0.293099	1.54883	2.35146	3.59639	0.505623	1.14417	3.14273	3.94102	1.15049	1.16996	0.650775	1.10558	0.844779	0.629896	0.707831	0.771976	0.636101	0.66992	2.9621	3.06101	3.0113	1.5859
chr4:42668782-42669537	Ccl27b	1.29291	2.41397	2.471	1.64532	1.3946	0.614979	1.9869	4.13218	0.64589	1.79027	1.13402	1.06094	1.41236	0.920197	1.49422	1.23029	2.00084	1.97905	2.46613	2.07807	1.62445	1.37891	1.35705	1.52055	0.894973	1.0326	0.792625	1.5839
chr14:6653871-6677154	Gm3500	1.04707	1.37706	1.28305	1.04079	1.36377	1.03668	1.00268	1.29444	0.71914	1.74178	1.88561	1.5393	1.39809	1.02426	2.15177	2.08664	1.43962	1.14258	1.39263	2.0774	1.38486	1.54465	1.78664	2.08552	2.57476	2.57591	2.66002	1.57988
chr14:44500562-44501033	Ear10	2.23002	4.67416	2.78982	2.44229	2.52873	3.36292	1.46347	3.82964	0.310921	0.465701	0.527602	0.409016	0.38665	0.284433	0.422171	1.39675	1.98108	0.81251	1.86437	1.78806	1.35943	1.50026	1.39566	2.24502	0.669963	0.636352	0.86495	1.57933
chr17:34419695-34424716	H2-Aa	1.51689	1.58665	1.49335	1.58376	1.62692	1.86657	1.53805	1.61461	1.9077	1.71661	1.80651	1.76838	1.63172	1.78064	1.77168	1.7929	1.61574	1.92662	1.54636	1.5748	1.42212	1.53984	1.62183	1.57966	0.77029	0.956922	0.990097	1.57582
chr13:61872939-61888642	BC052688	1.68901	2.26645	1.48269	2.41747	0.902221	0.878875	1.12426	1.13209	2.75384	3.20711	2.65984	2.7801	2.95156	3.26948	2.8674	2.97455	0.666951	0.577615	0.751404	0.660607	0.78748	0.404275	0.536257	0.760037	0.662245	0.664785	0.669368	1.574
chrX:52683411-52700069	Gm14625	1.74	1.69733	1.72173	1.73385	1.74151	1.84174	3.87725	1.86195	1.00561	1.85895	1.37221	1.05293	2.18546	1.81166	1.54415	1.42299	1.06632	0.996697	0.973573	0.971539	1.01878	1.01151	1.02032	1.00199	1.97182	0.990382	2.99891	1.57375
chr7:22985359-22986283	Gm6164	1.18281	1.19039	1.31311	0.374886	0.293623	1.8278	1.94843	1.19022	2.90258	0.562884	0.320059	3.36487	1.82388	3.76118	1.0667	1.32546	0.02821	1.21909	3.40555	0.516068	2.11834	0.921175	1.1368	3.33892	1.1467	2.54558	1.526	1.56857
chrX:150478528-150489584	Gm10057	1.55989	1.66322	1.32737	1.41292	1.52768	1.28001	1.39629	1.43028	1.48823	2.04732	1.65834	1.18405	1.43742	1.64159	1.47887	1.77181	1.38414	1.18549	1.94985	1.49371	1.5917	1.40518	2.02039	1.67024	1.99344	1.14683	2.17277	1.56737
chrX:150478528-150489582	4921511M17Rik	1.55993	1.6632	1.32738	1.41293	1.5277	1.28	1.39626	1.43025	1.48827	2.04723	1.65839	1.18408	1.43741	1.64164	1.47881	1.7718	1.38406	1.18539	1.94984	1.49371	1.5917	1.40511	2.02044	1.67022	1.9935	1.14686	2.17275	1.56737
chr4:42028814-42029569	Ccl27b	1.23877	2.29062	2.41972	2.01682	1.79603	0.845976	1.86637	3.93985	1.05	1.5351	0.971249	1.1345	1.19988	0.993841	1.21655	1.31043	1.98121	2.09684	2.93676	1.62916	1.34217	1.44716	1.03112	1.61197	0.776587	0.741282	0.875105	1.56648
chr7:15974199-15983892	Obox2	1.19172	1.24824	1.15665	1.49456	1.27885	1.16479	1.20548	1.24314	1.08539	2.07637	1.13934	1.25493	1.49968	1.33702	1.30957	2.51166	1.6118	3.43921	2.0955	2.12257	1.19682	2.00859	2.06776	1.64801	1.23583	1.31751	1.30542	1.56468
chr14:7010438-7020406	Gm10408	1.31934	2.15835	2.82104	1.2242	1.54376	1.8345	1.41323	1.13424	0.471052	1.44898	1.32595	0.837001	0.797173	0.866654	1.17673	1.37144	1.357	1.41759	1.69153	1.32377	1.44736	1.92547	2.08443	1.95531	2.3591	2.48357	2.42993	1.56366
chr17:18222020-18273607	Vmn2r91	1.32901	1.90295	1.90665	2.1195	1.30827	1.28752	1.05271	1.55808	2.31495	1.91912	2.00405	2.16309	3.62052	2.80654	2.11304	2.06185	0.996756	0.465497	1.49659	0.946423	0.973611	0.483849	0.972553	1.26203	0.820265	1.46151	0.831924	1.56218
chr7:111392970-111410750	Trim34a	0.804504	1.78624	0.908227	1.54418	0.960327	1.06133	1.5859	2.36827	0.956101	2.451	3.00821	1.84701	2.79688	1.22156	3.27069	2.78766	2.7525	0.820818	0.745417	0.921139	0.779965	1.39703	1.60884	1.01301	0.84469	1.00102	0.923517	1.5617
chrX:10885880-10886389	Gm14482	1.80999	1.73067	1.32953	1.28308	1.44649	0.724959	1.39372	1.69243	1.41576	1.40062	1.66329	1.44274	0.776025	0.896788	1.48098	1.21229	1.98249	2.00049	1.95976	1.31647	1.87455	1.72987	1.82783	1.48626	1.63955	0.870486	3.75795	1.56093
chrX:10885885-10886386	Gm14483	1.8077	1.73167	1.32722	1.28278	1.44753	0.724836	1.39715	1.68293	1.415	1.39312	1.6608	1.44668	0.778151	0.89484	1.47961	1.21342	1.98212	2.00085	1.96058	1.31507	1.87644	1.72891	1.82731	1.48711	1.64224	0.870339	3.76985	1.5609
chr17:7099577-7099686	Mir692-1	2.20511	1.56092	1.57072	1.22337	0.923508	1.48453	2.00388	0.928142	1.6537	0.835622	0.911801	1.04937	1.74354	2.32107	1.7702	1.9169	1.91717	1.46212	0.714127	2.21784	1.27615	2.26664	1.80534	2.21834	1.03817	1.56862	1.53288	1.55999
chr16:44820840-44839263	Cd200r4	0.981217	1.12663	1.05749	1.38563	2.13872	2.32391	1.66641	1.48139	1.54358	1.30958	1.38998	1.41176	1.4169	1.3988	1.43911	1.80099	1.08003	2.406	1.0728	1.61742	2.29788	1.11015	2.36605	2.05339	1.41289	0.745852	2.02012	1.55758
chr3:15695146-15748487	LOC100038947	0.805372	1.9309	1.68817	1.61842	1.80145	0.887396	0.661309	1.96594	1.49517	1.5915	1.54759	2.67065	1.476	2.10577	1.59471	1.96732	1.0545	1.03058	1.40169	2.03676	2.14481	1.3086	1.23025	1.20494	1.89198	1.93586	1.00589	1.55754
chr9:19584726-19588508	Olfr58	1.41052	1.23915	1.23065	1.15828	2.0503	1.19245	2.13841	0.489212	2.08983	0.339098	1.35276	1.22072	2.07291	1.30837	1.29539	0.4589	2.18563	1.91315	2.08892	1.29528	2.10191	1.78822	2.19805	2.15961	1.18411	1.95175	2.01565	1.55293
chr7:66933880-66933970	Snord116	0.241237	0.374524	0	0.378276	0.963675	1.00962	0.404113	0.413652	3.813	1.6439	2.12684	2.9873	1.90696	3.05542	2.59007	2.95915	2.38365	1.75775	2.21564	2.56402	0.285892	1.77923	1.85744	1.38222	1.69066	0.180237	0.960816	1.55279
chr3:93473254-93480205	Tdpoz1	1.46916	2.08732	1.67392	1.54182	1.35967	2.10902	1.21981	1.21745	1.36455	1.22624	1.65457	1.40899	1.70322	1.43301	1.81171	1.75692	1.53763	1.78496	2.17348	1.62718	1.05125	2.25905	0.763037	2.13959	1.14379	1.2949	1.11074	1.5527
chr4:42349016-42349771	Ccl27b	1.46981	2.16794	3.24328	2.09946	1.64033	1.03324	1.8775	3.68419	0.740344	1.55778	1.06732	1.08034	0.975695	0.989976	1.08377	1.46478	1.57771	1.92096	2.41068	2.09284	1.63985	1.28597	1.6195	1.18218	0.543205	0.561998	0.824751	1.54946
chr6:85758044-85759871	Gm11128	1.48475	1.40246	1.73311	1.54999	1.4001	1.39361	1.28621	1.59116	1.44554	1.35658	2.28473	2.14842	1.38308	1.92923	1.77853	0.970658	1.2701	1.69788	1.27273	1.4799	1.32707	1.44586	1.46351	2.09199	1.54751	1.41502	1.65908	1.54847
chrX:151523061-151524333	Magea1	1.70907	1.91029	1.72026	2.10013	1.84077	2.04209	1.95824	1.83924	1.50605	1.41882	1.21546	2.12665	0.979791	1.61942	1.38535	1.43238	1.88916	0.557038	1.35147	1.72043	1.14909	1.92809	1.65062	1.97705	1.33003	0.463105	0.978567	1.5481
chr7:22902340-22903264	Gm16442	0.950121	0.896467	0.289459	1.00699	1.66763	0.702201	0.395489	0.289363	1.93838	1.29599	1.51131	3.11621	2.46047	3.03233	1.81122	1.29042	1.52495	0.371771	2.86456	0.0118122	2.50124	1.73204	1.57381	1.16647	2.16442	2.51958	2.49513	1.53999
chr8:12395518-12399555	Sox1	1.73423	1.59575	1.53902	1.61819	1.6396	1.44664	1.64205	1.61847	1.43052	1.40116	1.26864	1.69454	1.34161	1.68941	1.45784	1.46197	1.47365	1.37195	1.68803	1.45749	1.5805	1.5275	1.57201	1.48639	1.66363	1.52402	1.64441	1.5396
chr1:175603810-175628523	Pydc3	1.27077	1.86792	1.51916	1.39388	1.93262	1.71339	2.1037	1.49456	1.60836	1.52891	1.61243	1.59696	1.27476	1.52645	1.53036	0.755455	1.27125	1.73181	2.1578	1.72309	1.47309	1.75516	1.76046	1.4891	1.13066	1.20733	1.12874	1.53919
chr11:87570365-87570429	Mir142	1.74543	1.61733	1.63731	1.25256	1.96458	0.999078	1.19721	1.75743	1.71927	1.17667	1.54498	1.20164	1.72183	1.68683	1.74167	1.58196	0.976132	1.51906	1.50491	1.62767	1.42612	1.87222	1.22442	1.33055	2.00014	1.80048	1.67458	1.53711
chr7:23936779-23963780	Gm4541	1.7354	1.33845	1.15888	1.23132	0.852331	1.44603	2.02799	1.1848	1.69016	1.29223	0.703473	1.9	1.28727	2.61524	1.29423	1.54521	0.472127	1.47316	3.34098	0.454271	1.58436	0.656872	1.53769	3.89626	1.2966	1.96233	1.47404	1.53525
chr4:63005599-63009196	Orm1	2.13991	1.06126	1.00849	1.00117	0.0174169	1.07488	1.15974	1.92799	1.25873	2.57831	2.53042	2.76467	0.963085	1.03338	1.99119	1.92763	2.33131	2.68042	2.49508	2.63409	1.16232	0.0088908	2.74813	2.93475	0	0	0	1.53457
chr14:3555026-3564989	Gm10408	1.22961	2.25807	2.67857	1.13291	1.57305	1.77439	1.43818	1.1507	0.450629	1.54525	1.27842	0.912453	0.734824	0.817691	1.13174	1.28728	1.33115	1.32528	1.70001	1.31064	1.37862	1.97614	2.06773	2.03316	2.46295	2.16378	2.1928	1.53096
chr16:36359467-36367656	BC100530	1.27947	1.96505	1.17567	1.94603	0.899344	1.0756	2.03456	0.695754	1.65339	1.83678	1.14043	1.79351	1.18145	1.68012	1.78769	1.16176	2.09378	1.24802	0.379455	2.06115	1.20456	2.0083	1.29946	1.96137	1.97351	1.99534	1.79761	1.53071
chr14:3794429-3804392	Gm10408	1.24519	2.13682	2.80911	1.0635	1.55427	1.78489	1.4214	1.06149	0.437547	1.52903	1.32387	0.925684	0.758699	0.803207	1.2156	1.33069	1.34084	1.29125	1.74688	1.26169	1.24541	1.9545	2.05589	1.91299	2.442	2.28088	2.38363	1.53026
chr8:22728639-22729444	Defa26	2.47403	1.36083	1.62861	1.2163	2.13422	1.40533	2.60814	1.51546	1.01865	1.52656	1.89993	2.05726	1.00403	1.85426	1.24056	2.1736	1.5171	0.603576	2.43806	1.69876	1.24215	2.45522	2.11944	1.45599	0.0182548	0.0470154	0.590105	1.52976
chr4:42028838-42039327	Gm2002	1.28316	2.28326	2.86983	2.15257	1.27426	0.700875	1.97518	3.75934	0.838428	1.53949	1.1196	1.06176	1.06022	0.827371	1.08855	1.26747	2.06105	1.94352	2.62623	1.85789	1.48056	1.37303	1.35049	1.33537	0.678985	0.764295	0.714814	1.52917
chr7:20790032-20790956	Gm6164	1.27201	1.14859	1.3038	0.438281	0.461724	1.69349	1.53442	1.02961	3.20762	0.438836	0.337571	3.20896	1.65405	4.04002	0.950112	1.38552	0.0353414	1.12934	3.21402	0.487042	1.65446	1.16156	1.4925	3.18162	1.07915	1.9799	1.7265	1.52763
chr7:20707004-20707928	Gm16442	0.818096	0.79825	0.335118	0.857441	1.16115	0.810626	0.548157	0.269243	2.15446	1.60097	1.98362	2.80862	2.26633	3.72873	1.71634	1.41765	1.44043	0.307519	3.19907	0.0404019	2.18576	1.50572	1.3954	1.27222	2.02983	2.03227	2.55711	1.52743
chr4:42029564-42039326	Gm13305	1.28652	2.28175	2.90531	2.16119	1.2359	0.689708	1.98185	3.74608	0.823557	1.53992	1.13154	1.05773	1.05003	0.813704	1.07938	1.26428	2.06735	1.93281	2.60191	1.87535	1.49041	1.36789	1.37414	1.31543	0.67176	0.76613	0.70309	1.52647
chr6:85710624-85715738	Cml3	1.62583	1.78776	2.18446	1.63905	1.70991	1.92317	1.7543	1.71675	1.54722	0.993475	1.65304	1.74472	0.843153	1.65759	0.709963	0.925754	1.98176	2.53153	1.71313	1.83558	1.86889	1.64766	1.67315	2.95493	0.232128	0.162026	0.1675	1.52535
chr6:130273304-130287644	Klra3	1.81914	1.91324	1.54722	2.18353	1.31549	0.5893	1.68472	1.59485	1.3781	2.0067	3.43641	1.41772	1.67085	1.52703	1.56559	0.417562	1.53587	0.773731	2.06389	1.71965	1.36029	0.522168	1.4984	1.5681	0.873248	1.81152	1.33573	1.52334
chr8:22224120-22224964	Defa25	1.50874	2.16331	0.73408	1.88052	2.19735	2.79277	1.28725	0.850875	3.09429	1.24264	1.55197	2.06909	2.13307	1.40962	0.977872	1.94206	1.1976	0.988346	0.053572	1.9743	1.58668	2.31115	1.48203	2.19348	0.448517	0.639255	0.394869	1.52242
chr7:21882587-21883532	Vmn1r121	0.854737	1.49318	1.33733	1.19185	1.27155	1.2288	1.00795	0.859697	1.39836	1.62551	1.771	2.23987	1.49593	2.05264	1.70778	0.676377	2.09799	1.08943	1.36894	1.6133	2.07662	2.85706	3.46554	1.72452	0.230047	2.28205	0.0868103	1.5224
chr4:42668806-42679295	Gm2002	1.23729	2.32799	2.85533	1.99927	1.44426	0.676245	1.91633	3.84168	0.874718	1.48715	1.12815	1.04481	1.11127	0.843445	1.21675	1.11488	1.98336	1.78235	2.50497	1.94523	1.57378	1.32267	1.30995	1.31968	0.682424	0.828916	0.720414	1.52197
chr13:50357183-50358238	2310081J21Rik	1.43955	1.91423	1.61311	1.38212	1.35511	1.62509	1.30927	2.00314	1.67454	1.28394	1.35799	2.40146	2.58663	1.81952	1.38553	1.40312	1.23861	0.899821	0.876902	2.08296	1.35052	1.85359	1.42422	0.749253	1.14616	1.60799	1.28244	1.52099
chr17:34400171-34406363	H2-Ab1	1.6585	1.64955	1.66982	1.52683	1.49426	1.5349	1.55858	1.49531	1.92853	1.78262	1.836	1.75682	1.69079	1.6075	1.51608	1.66078	1.58753	1.6298	1.48394	1.53363	1.41804	1.30091	1.63419	1.29996	0.869725	0.981641	0.935683	1.52007
chr5:147349223-147352003	Gm3409	1.7704	2.50124	1.2558	1.0169	2.95658	1.24716	2.24275	1.91967	1.65437	1.87857	1.26132	1.01833	1.27177	1.2992	0.983382	0.873303	1.19258	1.27631	0.637632	1.09689	0.752915	1.00793	2.01318	1.18542	2.29433	2.28514	2.13463	1.51954
chr7:3789728-3849694	Pira4	2.21391	2.98651	2.15918	1.01134	0.923714	1.65186	1.86122	1.71478	1.23259	2.02409	1.97167	1.77739	1.03348	1.44087	1.62895	1.39166	2.10308	1.28841	1.16633	1.13113	1.20527	0.907997	1.2288	1.28656	1.20184	1.19435	1.28223	1.51923
chr7:3789755-3849695	Pira11	2.214	2.98672	2.159	1.0115	0.923854	1.65256	1.86132	1.7139	1.23204	2.02419	1.97231	1.777	1.03373	1.44032	1.62964	1.39204	2.10329	1.28813	1.16679	1.13063	1.20518	0.907492	1.22846	1.2867	1.20159	1.19443	1.28235	1.51923
chr7:3789723-3849722	Pira7	2.21472	2.98522	2.15848	1.01136	0.923509	1.6516	1.86114	1.71427	1.23319	2.02413	1.97079	1.77731	1.03339	1.44274	1.62824	1.39129	2.10356	1.28817	1.16604	1.13207	1.20494	0.907769	1.22948	1.28613	1.20134	1.19381	1.28162	1.51912
chr4:42339258-42349747	Gm2002	1.28256	2.24084	2.77801	2.10096	1.31233	0.776666	1.94926	3.84483	0.822876	1.51839	1.08611	1.01343	1.00985	0.832334	1.11638	1.27218	2.09551	1.88296	2.47869	1.96178	1.38666	1.32495	1.32094	1.32857	0.736203	0.808838	0.696157	1.51771
chr4:42669532-42679294	Gm13305	1.23439	2.32281	2.88525	2.02575	1.44768	0.680141	1.9112	3.82258	0.892958	1.46461	1.1278	1.04532	1.08917	0.837549	1.19617	1.10543	1.98181	1.76784	2.50592	1.93547	1.57016	1.31816	1.30588	1.30397	0.666344	0.812978	0.714635	1.51748
chrX:35419651-35424865	Rhox10	0.959124	1.02775	1.00312	1.7585	0.93947	0.922959	0.915469	0.864295	0.925107	1.67234	1.35518	0.99006	1.31654	0.872611	1.29036	0.90532	0.994535	1.02436	1.74405	0.95505	0.863619	1.02281	0.92587	0.906859	5.92023	2.99583	5.88078	1.51675
chr4:42339259-42349021	Gm13305	1.26976	2.24542	2.74282	2.10258	1.2875	0.756297	1.95679	3.85642	0.829554	1.51603	1.0885	1.00928	1.0131	0.822108	1.11998	1.2581	2.13571	1.88155	2.48536	1.95155	1.36714	1.329	1.3001	1.34006	0.751159	0.827538	0.685964	1.5159
chr6:67515227-67515693	4930515G16Rik	1.38987	0.948174	0	0	0	1.0975	1.25526	0	2.35974	1.94355	2.18807	2.43299	2.41663	1.97331	2.03973	1.84603	1.41203	1.71385	2.44158	1.32148	0	1.0029	2.43911	2.39425	2.18867	1.1816	2.86381	1.51297
chr7:23013582-23014503	Gm4498	1.05463	1.29606	1.29237	0.723618	0.863247	1.52407	1.66709	1.22049	2.1459	0.892827	0.391051	2.67641	1.71107	3.31151	0.956733	1.4505	0.0181211	1.43803	3.60733	0.626739	2.34866	1.00544	1.12813	3.29768	0.702602	2.07715	1.38508	1.51158
chrX:10879557-10880047	Gm14474	1.12845	1.33895	1.25248	1.62616	1.08659	1.63322	1.12647	1.53543	1.59401	1.75012	1.36838	1.63496	0.810161	1.05419	1.96988	0.88483	1.64199	1.18989	1.49008	1.37592	1.20852	1.63886	1.39328	1.20137	2.87413	1.71655	3.24446	1.50998
chrX:10885949-10886267	Gm14475	1.81189	1.69948	1.31743	1.21251	1.42987	0.618362	1.44634	1.33756	1.38147	1.0824	1.60532	1.49168	0.776701	0.762698	1.4081	1.21744	1.91967	1.7076	1.92369	1.26085	1.90754	1.73923	1.71106	1.50707	1.67084	0.868008	3.89915	1.50792
chr2:175788488-175800169	Gm14440	1.17443	0.877421	0.517125	0.748136	1.39627	1.17179	0.838977	1.27522	2.11246	1.52004	2.16068	2.23978	1.23035	2.01753	2.33023	2.52901	1.41125	2.15182	1.62835	1.27792	2.25083	1.45272	1.28471	0.946297	1.31474	1.44698	1.37319	1.5066
chr7:3788416-3867086	Pira1	2.61298	2.77245	1.94978	1.04987	0.766373	1.70707	1.93681	1.65115	1.52031	1.96203	1.7708	1.89776	1.09108	1.72347	1.30363	1.54529	2.29648	1.25987	0.945209	1.41014	0.996862	0.993585	1.46872	1.06142	0.969176	0.969784	1.03803	1.5063
chr2:175100625-175112306	Gm14440	1.20866	0.942068	0.531492	0.777142	1.19097	1.11318	0.822564	1.29326	2.1413	1.52686	2.25186	2.33673	1.20649	2.01721	2.40719	2.49129	1.42693	2.22212	1.56422	1.29489	2.2342	1.48183	1.14068	0.823195	1.34715	1.40599	1.43128	1.50484
chr5:95902559-95914124	Gm3286	0.877193	2.00734	0.38862	2.01389	2.13746	2.02593	2.0913	3.00763	0.875586	0.890278	0.920856	1.51148	1.4938	0.972681	2.64828	2.35505	0.0101377	1.71437	1.53671	0.993651	0.987966	1.01552	1.48895	0.322288	2.38955	2.49786	1.41248	1.50322
chr7:113219244-113222662	Gm8979	0.708381	1.08185	0.716734	2.78737	0.796546	0.775427	1.55784	3.14192	1.47924	0.964273	1.43701	1.17003	1.41962	1.5749	1.36967	1.50551	1.82672	1.47223	1.26249	1.17311	1.16728	1.38868	1.09835	2.22082	2.2494	2.13064	2.08074	1.5021
chrX:35037938-35042776	Rhox3g-ps	1.4115	2.09677	2.02582	1.12004	1.06582	1.60102	1.06701	1.42246	1.06096	1.24273	0.926325	1.16701	0.3882	0.905318	0.600415	1.04909	1.22099	2.73946	1.02231	1.65431	1.61724	0.820008	1.15847	1.55746	3.80947	1.82708	3.90254	1.49925
chr8:22427087-22428056	Defa3	2.45034	1.57849	1.78589	1.5146	1.21102	1.09965	2.30634	2.16951	0.796709	2.14375	1.33147	1.20658	1.09331	1.98523	1.31901	0.718336	1.50191	1.37942	2.66095	2.51089	1.05633	2.28193	2.32993	1.45841	0	0.00653567	0.580463	1.49915
chr5:147325698-147328478	Gm3402	2.15154	1.36916	0.987297	0.753715	1.99013	0.839841	1.92302	1.31676	1.70351	3.02262	1.13681	1.17145	1.29708	1.77493	1.58746	0.772025	1.03203	1.14324	0.688674	1.09464	1.21466	0.947397	1.92843	1.65417	2.27264	2.30167	2.26709	1.49415
chr13:21903614-21904019	Hist1h4m	1.62433	1.12335	1.77973	1.76719	1.91932	2.18291	1.15902	1.8189	1.84405	1.42634	1.14988	1.56775	1.87097	1.55067	1.77353	1.37954	1.63761	1.48324	1.5294	1.07633	1.45994	1.12084	1.21005	1.45562	1.00573	0.960209	1.46299	1.49405
chr14:44740831-44749036	4930503E14Rik	2.40869	4.31953	3.3096	2.55061	2.51186	3.08759	1.49566	3.51008	0.662518	0.513862	0.677844	0.542464	0.593702	0.605056	0.29893	1.41148	2.05093	0.553076	1.18653	1.60572	1.50066	1.34063	1.32493	2.04523	0.040822	0.079581	0.0984846	1.49356
chr4:42667440-42669537	Ccl27b	1.2126	2.23088	2.47788	1.93012	1.38653	0.697399	1.94204	3.82999	0.762523	1.6868	0.990059	1.08174	1.29366	0.846801	1.34817	1.24144	1.88704	1.85469	2.42845	2.07492	1.39425	1.17989	1.16417	1.25266	0.677399	0.782302	0.641687	1.49245
chr4:60732253-60736153	Mup12	1.51052	1.20666	0.987777	1.42857	1.44426	1.71049	0.882619	1.38526	0.598659	0.838385	0.774227	0.609163	0.552486	0.824194	0.742195	0.867065	2.20071	2.8517	4.11816	0.353083	1.24834	1.50434	3.39031	1.19975	2.24165	2.54293	2.19803	1.48932
chr6:66586816-66587746	Vmn1r34	2.39807	1.52205	1.8166	1.83031	2.00517	1.19011	2.07684	1.64153	1.13452	1.41084	1.42032	1.51911	1.32887	1.26433	1.32708	1.23718	1.32226	1.53268	1.26194	1.48283	1.65102	1.46592	1.44782	1.39605	0.973159	1.25493	1.1389	1.48335
chr4:42349016-42351113	Ccl27b	1.30625	2.14424	2.83874	2.2059	1.38216	0.76159	1.94408	3.52204	0.739498	1.42209	1.08153	1.09509	1.12191	0.891883	1.0438	1.4543	1.62221	1.73816	2.30973	2.10601	1.3529	1.32614	1.32615	1.15815	0.739428	0.636733	0.674853	1.47947
chr7:3835813-3849694	Gm14548	2.06649	2.01471	1.73422	1.19684	1.30551	1.43207	1.89496	1.80258	1.54106	1.85847	1.36166	1.64338	1.08337	1.96	1.26189	1.21941	1.90749	1.38882	1.18519	1.26283	1.12041	1.0991	1.49936	1.32232	1.29887	1.24231	1.24186	1.47945
chr7:11032137-11033136	Vmn1r67	1.92748	0	0.962919	0.969025	0.810799	1.84929	1.81959	1.81919	1.55612	2.01153	0.880092	2.31627	0	1.61806	0.803008	0	2.17397	2.07637	1.82789	1.96731	2.07373	2.14647	1.79808	1.79258	1.62216	2.04906	1.03753	1.47809
chr7:54441135-54444725	Mrgpra6	1.4697	1.39842	1.26153	1.26277	1.631	1.47329	1.5596	1.54411	1.38792	1.37458	1.49944	1.28323	1.41067	1.46631	1.60212	1.54761	1.48183	1.44697	1.33541	1.46908	1.262	1.44391	1.54579	1.50283	1.60816	1.76037	1.7828	1.4745
chr4:42027472-42029569	Ccl27b	1.26444	2.24111	2.52511	2.07783	1.36321	0.801306	1.87746	3.57484	0.950081	1.49163	0.935163	1.1849	1.08513	0.842117	1.27618	1.19472	1.97327	1.85973	2.34796	1.73661	1.28122	1.3496	1.2436	1.38356	0.664034	0.688487	0.586854	1.47408
chr17:34644879-34654297	Btnl6	1.07122	1.55867	1.33751	1.62832	0.915099	1.54364	0.891522	1.4951	1.33114	1.49639	2.88601	1.83047	0.569472	0.881353	0.834597	1.50845	2.16312	1.50238	1.39754	2.3132	2.29932	2.15376	0.802985	1.55647	1.22963	1.26103	1.27997	1.47179
chr3:93978333-93982115	Gm10696	1.2252	0.568028	0.964907	0.935246	1.61339	0.527447	1.57567	1.77881	2.03549	2.01434	1.90077	2.62628	1.24798	1.88062	1.68295	1.17086	1.36845	0.976556	0.536678	1.98059	1.32985	1.89764	2.16012	1.05023	1.41902	1.64971	1.61918	1.4717
chr14:51153088-51154024	Olfr743	1.4273	1.33619	1.48759	1.26169	1.48217	1.54904	1.61325	1.44158	1.84092	1.47865	1.34088	1.49999	1.49784	1.41441	1.30547	1.61535	1.3616	1.38259	1.89192	1.55892	1.23797	1.58967	1.7625	1.57464	1.032	1.0889	1.50573	1.46588
chr2:89457324-89458402	Olfr1248	1.85007	1.24	0.393907	0.284996	1.42473	0.367132	1.89105	0.319838	1.85495	2.58325	2.52773	2.08181	2.15379	1.74191	2.02241	1.07118	1.24242	1.17124	1.09394	0.214885	0.979099	2.12325	1.7003	2.12193	1.71705	1.87974	1.52015	1.46566
chr7:21668216-21669140	Vmn1r117	0.95533	1.44912	2.19936	0.629198	1.00772	1.64839	1.71595	1.07498	2.3634	0.36903	0.473121	3.20977	1.25698	2.18757	0.613071	0.926092	0.0581982	1.43596	2.34377	1.34758	2.57778	1.72645	1.16282	2.90745	0.791093	2.17043	0.938515	1.46441
chrX:34894843-34899631	Rhox4c	0.775343	1.75852	1.80119	1.3759	1.50698	1.05823	1.17196	1.05134	0.956175	1.02208	1.24844	1.11333	2.08477	1.2447	1.67571	1.44907	1.03501	0.870053	0.509616	0.339523	1.12081	0.0769021	0.844751	0.450634	5.26591	2.6477	5.00781	1.46157
chrX:34907916-34912222	Rhox2d	0.779767	1.49644	1.41038	1.32768	1.61547	0.961022	1.40119	1.1319	0.910554	0.662126	1.36839	0.937879	1.93702	1.01442	1.56936	1.40337	0.972929	1.41331	0.846511	0.740122	1.3974	0.0734664	0.492617	0.547656	5.35562	2.42996	5.18568	1.4586
chr12:56331464-56364007	Srp54c	1.48777	1.28165	1.45977	1.52294	1.52693	1.57355	1.44699	1.46741	1.18277	2.05869	1.51298	1.0021	0.465701	0.967762	1.02444	1.59835	1.54526	1.45377	1.5106	1.56746	2.7573	1.54568	1.58755	1.59511	1.39301	1.36435	1.42377	1.45643
chr10:81205565-81233887	Zfp781	1.3285	1.46765	1.48151	1.43934	0.727687	1.00106	1.31091	1.57123	1.56787	1.46648	0.837233	1.28835	1.44574	1.55214	1.29481	1.59934	0.826319	1.34402	1.46796	1.43946	2.10017	1.40009	1.41594	1.32712	2.20053	2.20464	2.10927	1.45242
chr7:9246438-9270107	Vmn2r40	0.422533	2.47686	1.16861	1.71627	2.72901	0.853446	0.428618	1.32162	1.43773	1.55165	1.43166	1.34007	1.77822	1.22806	1.27586	1.29286	1.01204	1.54517	1.99698	1.04125	1.23882	1.43755	1.05282	1.03547	2.05283	2.13595	2.13996	1.4497
chr5:23763345-23763430	Mir684-1	1.91042	1.40543	1.3014	1.42274	1.19242	1.17776	1.96243	2.08218	1.17268	1.1837	1.5937	0.931321	1.56321	1.08066	2.13726	0.863016	1.40285	1.36635	1.48824	1.90196	0.885431	0.675278	1.7627	1.41821	1.93865	1.58687	1.72583	1.44936
chr13:21903652-21903964	Hist1h4n	1.59193	1.0822	1.72736	1.68428	1.73454	2.15909	1.13683	1.8231	1.81933	1.46592	1.23429	1.48108	1.82796	1.54701	1.77346	1.29552	1.62709	1.44745	1.46857	1.03606	1.37349	1.0183	1.11354	1.39166	0.898418	0.945241	1.40332	1.44841
chr7:9965778-9989425	Vmn2r41	0.385295	2.46202	1.20086	1.67727	2.74187	0.893298	0.410703	1.33094	1.34217	1.53109	1.44439	1.27448	1.70613	1.18346	1.22362	1.26273	1.04341	1.5864	2.08309	1.12783	1.23909	1.47408	1.06302	1.05806	2.13796	2.07504	2.00181	1.44297
chr7:23627706-23628624	Vmn1r159	0.33375	1.3597	0.400611	1.20075	2.35367	1.43419	0.421472	1.07511	0.426722	2.25219	1.44823	0.692616	2.09239	0.803019	2.23263	1.22415	0.870843	2.76844	2.33593	2.03936	1.81346	1.52981	2.689	2.25922	0.0783705	2.54079	0.183637	1.43926
chr7:113219245-113221378	Gm8989	0.630993	0.917964	0.684973	2.80912	0.818646	0.741457	1.56499	3.12332	1.46403	1.00083	1.13498	1.26426	1.46914	1.40373	1.25617	1.4695	1.68216	1.19265	1.07767	1.16153	1.10084	1.46739	1.07114	1.98293	2.37415	2.03789	1.89548	1.43696
chr7:111477984-111485131	Trim34b	1.47355	1.44599	1.3889	1.7388	1.70315	1.47382	1.641	1.91773	1.32379	1.88512	1.10917	1.30761	1.7131	1.13663	1.1723	1.61021	1.59497	1.59701	1.54504	1.2168	1.17766	0.660999	1.58739	1.36117	1.28304	1.37123	1.30707	1.43494
chr7:113010294-113011841	Gm15645	0.862479	0.956306	0.954692	2.51536	1.3282	1.06439	1.63375	3.24792	0.847041	1.33322	0.854154	0.947326	1.15255	1.21835	0.98858	1.03649	1.68925	1.17739	1.35466	1.08719	1.22218	1.29472	1.01465	2.23618	2.0516	2.41863	2.23286	1.43408
chr14:42668556-42674084	1700091H14Rik	1.59149	1.08896	0.979049	1.53953	1.02297	0.955606	1.80366	1.17769	2.15241	1.55906	2.48657	1.90204	1.77568	2.43054	2.00357	0.729164	0.466979	2.18488	1.07876	2.20241	1.72833	1.15404	1.64058	1.02877	0.613479	0.753441	0.6604	1.43371
chr4:88406677-88407488	Gm13283	2.18337	0.42638	2.52293	0.280568	1.23067	1.69147	2.50198	0.702375	1.46651	1.6509	0.529348	1.06859	1.12317	0.765434	0.610129	2.89747	1.2723	2.01347	1.03454	2.17666	1.54721	0.778754	1.20802	1.60425	1.61557	2.10576	1.67138	1.43256
chr7:23656242-23657166	Vmn1r160	0.453812	1.64387	0.883529	1.00514	2.10494	1.73969	0.46999	1.1124	0.276448	1.98032	1.92706	0.859118	2.1183	0.943806	2.06603	1.11309	1.15651	2.53257	2.17455	0.646271	1.3639	2.11315	2.9518	2.70928	0	2.20905	0.0585003	1.43012
chr12:104689107-104695433	Ifi27l2b	1.32051	0.393607	1.23179	0.365727	0.555654	0.677131	0.414478	1.1978	1.1733	2.14885	2.09197	1.38005	2.89836	1.97813	0.396552	1.31545	1.00011	2.14503	2.0141	0.894256	2.08083	1.23596	2.00847	1.51096	2.11284	2.04238	1.98103	1.42835
chr8:22639501-22640484	Gm15308	0.299552	0.142546	0.252379	0.143573	0.121628	6.73394	0.182	0.288197	0.0157798	0.137746	0.349888	0.144282	0.208188	0.218009	0.147485	2.00805	0.128403	1.189	3.30024	1.82448	2.57266	5.21826	5.25747	3.29681	1.94674	1.58455	0.814711	1.42691
chrX:34826611-34831313	Rhox2b	1.18701	1.06769	1.06969	1.16875	1.62602	2.50353	1.29223	1.46989	1.32258	1.39661	1.30885	1.49301	2.29951	1.0039	1.66541	1.27952	1.28573	0.783306	1.139	0.831577	0.959204	0.0257035	1.91533	0.757606	3.18824	1.54888	2.88246	1.42486
chr5:95885824-95914608	D5Ertd577e	0.805628	1.81276	0.419971	1.91713	2.01432	1.9501	2.02721	2.84211	0.754931	0.955447	1.05177	1.33986	1.29934	0.821511	2.26966	2.30065	0.0261034	1.49741	1.32376	0.962976	1.14584	1.12115	1.38115	0.286388	2.29964	2.43877	1.35647	1.42304
chr7:110665924-110666896	Olfr611	2.13788	1.76824	2.1697	1.4788	1.16935	1.61625	2.49514	2.19502	0.231699	0.263634	1.09422	0.293582	1.09707	0.304221	0.196486	0.724269	1.62399	1.67053	2.43672	1.80398	2.07627	1.74923	2.06553	1.34248	1.63875	1.47113	1.29827	1.42268
chrX:8091177-8102080	Gm14459	1.20022	1.14191	1.08955	1.22693	1.16649	1.17433	1.15951	1.07675	1.67966	1.8415	1.21913	1.6294	1.3136	1.49839	1.49622	1.88979	1.4417	1.31904	1.29782	1.23632	1.45142	1.27925	1.48155	1.28075	2.1611	1.47016	2.09861	1.4193
chr4:63017195-63020545	Orm3	2.22322	1.20476	1.05766	1.1497	0	1.21872	1.20724	2.32195	1.12173	2.00905	2.2705	2.0869	1.02529	0.777463	0.162804	1.47292	3.51657	2.52558	2.3084	2.55427	1.08933	0	2.57013	2.39819	0	0	0	1.4175
chr7:113465909-113468042	Gm8989	0.645596	1.09177	0.753621	2.71063	0.732085	0.771413	1.49014	2.83032	1.31761	1.01976	1.20086	1.11114	1.34	1.25992	1.3158	1.25155	1.66014	1.34449	0.871011	1.20346	1.28022	1.47093	1.06899	2.04335	2.16156	2.15009	2.16138	1.41696
chr5:94064210-94100489	C87414	1.71538	1.7088	1.68222	1.7153	1.88963	1.66338	1.11057	1.76483	1.69124	1.33992	1.26429	1.8625	1.82216	2.09685	1.91986	1.77888	1.77565	1.07424	1.72484	1.08634	0.377035	0.343412	1.09943	1.74744	0.40423	0.444419	1.07543	1.41401
chr3:88187416-88188386	Bglap	0.644904	3.71598	1.87199	0.158624	1.85939	1.70373	0.145977	0.264733	0.48864	1.38144	1.07228	0.77226	1.17435	0.572144	1.12193	2.1267	1.95124	1.93837	2.52496	2.26771	1.43711	1.97809	2.38121	2.85123	0.624392	0.520676	0.554086	1.41126
chr12:105001796-105011843	Serpina1d	1.38179	1.36143	1.46176	1.49682	1.65173	1.39613	1.59103	1.30827	0.877513	1.22624	2.54384	0.587127	1.00467	1.07371	1.73817	2.34434	1.42364	1.37225	1.34351	1.35182	1.444	1.36422	1.45062	1.43864	1.26474	1.19438	1.23564	1.40474
chr11:99670391-99671210	Krtap4-13	1.57273	1.82179	1.04928	1.00165	2.05681	0.97662	1.88946	1.82745	0.778239	0.650674	1.13337	0.800577	0.725513	1.37211	1.33029	1.10697	0.585877	1.2886	1.30881	1.92977	1.65623	1.63429	1.63817	1.63537	2.31917	1.65887	2.16286	1.40413
chr5:96221657-96233254	Gm3286	0.612236	1.32125	0.784709	1.41113	2.65984	1.84495	2.26036	2.1376	0.609286	1.28811	0.83822	2.24823	1.42612	1.18134	2.53249	2.79202	0.00852133	0.963431	0.39707	0.650064	0.759849	0.750502	0.431613	0.921497	2.67498	2.66643	1.68364	1.40206
chrX:10882780-10883098	Gm14475	1.30139	1.18745	1.20051	0.914336	0.494876	0.75724	1.03585	0.97107	1.35735	1.10119	1.20884	1.37747	1.1074	0.940942	1.23129	1.62291	2.1309	1.72752	2.4192	1.29982	1.51911	2.15559	1.9105	1.15972	1.95939	0.93874	2.81418	1.40166
chr16:36277233-36285457	Stfa1	0.778622	0.334805	0.962315	0.292422	1.27387	2.89131	1.38228	1.12552	1.39371	2.24856	2.5424	0.413528	2.74987	2.48553	1.29475	1.85815	0.220076	1.73253	1.48468	0.219961	2.57015	1.15121	1.80252	1.08198	1.08479	0.178837	2.27068	1.40093
chr10:117726685-117732094	Iltifb	0.292259	0.265123	0.270698	0.262288	0.278477	0.302096	0.289587	0.277882	0.263212	0.224352	0.411074	0.2468	1.15705	0.244694	0.265824	0.211053	2.96541	2.70106	2.03722	2.79737	3.55894	3.61473	1.96438	2.03917	3.45205	3.88494	3.5186	1.39986
chr7:9927006-9944061	Vmn2r42	0.496773	2.81613	1.05729	2.11548	3.11372	0.703836	0.572636	1.67503	2.03302	1.81902	0.950562	1.48528	1.55654	1.44549	1.44027	0.797808	0.601301	1.24267	1.65451	0.567925	0.615462	0.725859	0.636444	0.556695	2.34528	2.50687	2.23645	1.39883
chr17:6814820-6825643	Tmem181c-ps	0.570712	1.20087	0.47141	0.814181	4.09398	2.94495	1.38337	3.43156	0.642175	0.772062	1.05992	0.851324	0.736154	0.652057	0.591546	0.567195	1.19084	1.11411	4.03295	1.71268	1.04957	2.44668	1.10066	1.14939	1.03108	0.986795	1.12899	1.3973
chrX:8552837-8553685	Gm14511	1.37957	0.79741	1.68123	1.22263	0.891991	1.23529	1.33987	1.06285	0.740129	1.20458	1.10477	0.939622	1.45528	1.49692	1.07722	1.46956	1.17721	1.03364	0.899678	1.06212	1.03722	1.18602	1.07249	1.12721	4.55076	2.13011	3.30529	1.39558
chr13:33415945-33427235	Serpinb9f	2.15845	2.1385	2.13564	2.01987	1.13567	1.11689	1.24278	1.97892	0.371615	0.377802	0.337748	0.34708	0.363575	0.476501	0.37732	0.378743	2.07147	2.04418	2.15435	2.06785	2.12244	2.06268	2.24856	2.15078	1.16557	1.33686	1.18367	1.39132
chr2:10405818-10405915	Mir669a-1	1.74007	2.28462	1.7924	1.20924	0.74259	1.4872	1.0501	1.39786	1.54625	2.15118	1.10105	1.17784	1.5179	1.58385	0.93053	1.22363	1.0598	1.28262	1.05874	0.795433	1.1887	0.993887	1.85344	0.653368	2.11562	1.60101	2.00824	1.39064
chr2:10405822-10405909	Mir669a-10	1.74007	2.28462	1.7924	1.20924	0.74259	1.4872	1.0501	1.39786	1.54625	2.15118	1.10105	1.17784	1.5179	1.58385	0.93053	1.22363	1.0598	1.28262	1.05874	0.795433	1.1887	0.993887	1.85344	0.653368	2.11562	1.60101	2.00824	1.39064
chr2:10405816-10405911	Mir669a-2	1.74007	2.28462	1.7924	1.20924	0.74259	1.4872	1.0501	1.39786	1.54625	2.15118	1.10105	1.17784	1.5179	1.58385	0.93053	1.22363	1.0598	1.28262	1.05874	0.795433	1.1887	0.993887	1.85344	0.653368	2.11562	1.60101	2.00824	1.39064
chr7:3788411-3796653	Pira2	2.24507	2.61103	2.16917	0.760594	0.825458	0.681036	1.83638	2.59773	1.37124	1.47129	1.09883	1.5514	0.68973	1.40161	0.556131	0.80471	1.90251	1.54709	0.499821	1.6404	1.1089	1.69053	1.82805	1.20728	1.14948	1.13427	1.16592	1.39058
chr7:21696445-21697366	Gm4498	0.602876	1.10577	1.28098	0.420842	0.377847	1.52833	1.31584	0.784324	1.87929	0.577074	0.286593	2.07292	1.36215	2.84398	0.8306	0.846766	0.0131022	1.39788	3.30783	1.71142	2.14554	1.69246	1.24391	4.10408	0.553394	2.30397	0.867234	1.3873
chr2:175017505-175163713	0610010B08Rik	1.07296	0.892001	0.879647	1.05109	1.18464	1.11005	0.676601	1.2375	2.07286	1.83132	2.19591	2.01709	1.40881	1.88462	2.21678	2.38373	0.963626	1.73861	1.5692	0.951643	2.34883	0.967868	0.95584	0.741122	1.01163	1.02649	0.880118	1.38039
chr17:6635807-6646630	Tmem181c-ps	0.549873	1.15274	0.478681	0.721831	3.70869	2.73538	1.42002	3.55878	0.705219	0.785719	1.08687	0.827866	0.716451	0.68996	0.64121	0.527532	1.13266	1.0929	3.9127	1.69469	1.12534	2.5375	1.11232	1.08121	1.02006	1.0089	1.17652	1.37784
chr8:22341282-22342125	Gm15293	1.37651	1.28314	1.2981	1.21742	0.783138	1.4583	1.87588	1.42567	1.15203	1.89716	0.896613	0.933836	0.576582	1.41182	0.804114	0.984543	1.69315	1.85555	1.95759	2.7775	1.1067	2.41957	1.97786	2.39493	0.640813	0.333704	0.54216	1.37313
chr1:175451441-175466088	BC094916	0.27326	1.85206	1.1056	1.08226	2.07969	1.16488	1.98048	1.04928	2.10627	1.16004	2.16233	2.10554	0.303611	1.14864	1.18385	1.16481	0.270164	1.19044	2.14172	1.88099	1.00973	1.89592	1.1407	1.10984	1.50828	1.47346	1.49438	1.37179
chr14:59895749-59916359	Phf11	0.237075	0.221558	1.18962	0.279358	1.32094	1.23562	1.20084	2.1364	1.51177	1.20462	1.1574	0.809515	1.13469	2.24235	1.92507	0.513884	2.0185	1.97822	2.14363	2.09577	2.0703	2.97477	1.08714	1.98243	0.731083	0.838637	0.796535	1.37177
chr2:175100624-175109351	Gm14288	1.01499	0.798744	0.557834	0.796353	1.00341	1.02957	0.732326	1.15204	2.04535	1.5737	2.11447	2.18027	1.18372	1.93306	2.28449	2.35193	1.24334	1.93975	1.32691	1.16088	2.07674	1.26406	1.00318	0.681743	1.16503	1.22056	1.19927	1.37162
chrX:52480052-52496913	Slxl1	1.2608	1.19345	1.21297	0.966959	1.57842	1.36802	1.45944	1.09758	1.083	1.00663	1.39566	1.17142	0.934065	1.34563	1.45786	1.36566	1.77787	1.08873	0.909116	1.77738	1.37576	1.32177	1.22652	1.7293	2.37315	1.19219	2.25049	1.3674
chr2:175791443-175800170	Gm14288	1.02374	0.766455	0.542467	0.763205	1.10981	1.07405	0.745246	1.08416	2.05067	1.52301	2.04607	2.13285	1.20931	2.0105	2.22388	2.43492	1.23933	1.88872	1.37058	1.05084	2.06538	1.21593	1.06888	0.766533	1.10492	1.23841	1.16733	1.3673
chr6:129963051-129976978	Klra19	1.94471	2.0151	1.988	0.0719071	2.06104	1.75454	0.95072	1.91681	0.101206	1.15647	2.12313	0.103076	1.96901	0.0756213	2.04007	1.93683	0.91963	1.03376	1.88146	1.97643	1.94988	1.03063	0.993757	1.97932	0.0239596	1.94393	0.968742	1.36703
chr6:129963050-129976972	Klra6	1.94475	2.01507	1.98781	0.0717419	2.06107	1.75448	0.950658	1.91681	0.101096	1.15632	2.12302	0.102889	1.96886	0.0755876	2.04012	1.93683	0.919351	1.03352	1.88131	1.97629	1.94959	1.03063	0.993704	1.97894	0.0239682	1.94381	0.968802	1.36693
chr8:22776268-22777205	Gm15315	1.91107	0.641272	1.09645	0.796334	2.15829	1.45837	2.019	1.13155	1.57221	1.30612	1.14611	2.8018	1.22084	1.99886	0.845314	1.9767	0.600634	0.852539	1.93953	1.74085	1.39515	2.14486	1.52019	1.26533	0.338022	0.416463	0.426722	1.36002
chr11:99664861-99665760	Gm11569	1.11414	1.10729	0.890399	1.09301	1.26585	1.21159	1.34665	1.14065	1.46532	1.44454	1.81227	1.7706	1.17542	2.39376	2.31291	1.71455	0.753182	1.11816	1.14936	1.12904	1.17668	0.953148	1.37237	1.29894	1.57593	1.6519	1.27865	1.35986
chr4:61096818-61100736	Mup15	1.50315	1.1333	1.49521	1.63909	1.57312	1.74627	0.849949	2.30455	0.663245	1.80233	0.614035	0.920989	1.1785	1.1562	0.555228	0.629457	1.20214	1.36793	1.73866	1.97471	1.90743	2.29191	1.72964	1.56315	0.995533	1.10322	0.989515	1.35661
chr4:143649028-143659221	Pramel4	1.29448	1.33057	1.19842	1.23455	1.38609	1.21516	1.31463	1.24588	1.35436	1.46063	1.36953	1.51804	1.30661	1.37394	1.97159	1.43862	1.29611	1.36736	1.27756	1.32434	1.24573	1.30103	1.38055	1.31143	1.16525	1.42791	1.32882	1.3496
chr2:10415648-10415743	Mir669a-2	1.2074	1.40025	1.05435	0.729985	0.562357	1.22246	1.12789	0.49114	1.31432	0.235131	1.42859	1.32982	0.999596	0.976223	1.07974	1.07879	1.70114	1.18812	1.2737	1.8078	1.37443	1.54605	2.12948	1.80637	2.61341	2.42014	2.28388	1.3475
chr2:10415654-10415741	Mir669a-10	1.2074	1.40025	1.05435	0.729985	0.550192	1.22246	1.12789	0.49114	1.31432	0.233204	1.41569	1.32982	0.999596	0.976223	1.07974	1.07879	1.70114	1.18812	1.2737	1.8078	1.37443	1.54605	2.12948	1.80637	2.61341	2.42014	2.28388	1.3465
chr2:10415650-10415747	Mir669a-1	1.2074	1.40025	1.05435	0.729985	0.542545	1.22246	1.12789	0.49114	1.31432	0.232265	1.40913	1.32982	0.999596	0.976223	1.07974	1.07879	1.70114	1.18812	1.2737	1.8078	1.37443	1.54605	2.12948	1.80637	2.61341	2.42014	2.28388	1.34594
chr4:60961068-60965030	Mup14	1.54433	1.06795	0.75998	1.56441	1.58604	2.01996	1.07907	1.61726	0.610939	1.09661	0.583078	0.782122	0.726627	0.495722	0.478942	0.524322	1.4926	1.87335	2.51213	1.82889	2.07381	1.85414	2.53723	1.52798	1.25292	1.27496	1.37356	1.33848
chr7:113072848-113077205	Gm18853	0.00324725	0.583048	0.0049734	2.85285	0.0335391	0.6068	1.69636	3.14037	1.1923	1.16848	1.18303	0.640114	0.995895	1.13303	1.19515	1.16003	1.70864	1.14589	1.14922	1.30623	1.29241	1.75975	1.20211	2.29861	1.89664	2.50309	2.12712	1.33255
chr7:113072857-113077205	Gm17757	0.00325397	0.583752	0.0049837	2.85294	0.0336085	0.606036	1.69606	3.14139	1.19123	1.16814	1.18272	0.640121	0.99582	1.13245	1.19502	1.15878	1.70889	1.14508	1.1497	1.30698	1.29302	1.76014	1.20226	2.29861	1.89551	2.50387	2.12729	1.33251
chr11:99664983-99665760	Gm11554	1.04978	1.00891	0.818641	1.07106	1.22549	1.16324	1.33364	1.09141	1.46346	1.40989	1.78374	1.69592	1.17478	2.42559	2.39746	1.72985	0.770721	1.03663	1.08827	1.01534	1.12977	0.930511	1.31963	1.26809	1.45477	1.67982	1.29817	1.32721
chr5:138307056-138312986	Pilrb2	1.36842	1.32588	0.872946	1.52863	1.49835	2.11764	1.50199	2.25868	0.914514	0.471038	1.70463	0.588617	0.539405	0.569245	0.526609	0.78626	1.02333	1.61878	1.08938	1.03372	2.20018	1.18786	0.908485	0.92804	2.75162	2.08962	2.38812	1.32563
chr15:77338700-77347749	Apol11a	1.98395	1.22223	2.04311	1.69591	0.359552	1.18447	1.2133	0.343857	2.56716	2.23413	1.41051	1.89202	1.18382	1.68821	1.09347	0.75794	2.06178	1.28965	0.277271	2.09638	1.21413	1.18637	1.27784	0.307168	0.981153	1.03701	1.08839	1.32188
chrX:8563025-8563881	Gm14458	0.658958	0.963322	1.0171	0.860459	1.15918	0.925515	1.01476	1.52558	1.29582	1.59582	0.813855	1.42766	0.470225	1.2836	0.746614	1.26716	0.829274	1.10322	1.34003	1.16525	1.12765	1.58028	1.26814	1.12641	3.67076	1.73018	3.70673	1.32124
chr7:22057197-22058121	Vmn1r125	0.390764	0.931032	1.06981	0.577655	1.10527	1.25289	0.62447	0.520628	2.52637	1.86331	0.887556	2.73996	0.860315	5.07035	1.18324	0.345249	0.126434	1.68091	3.74979	0.233262	1.47191	1.22334	0.56162	0.776395	0.596931	2.07959	1.19932	1.32031
chr9:38480088-38481066	Olfr918	1.01222	1.7806	1.14966	1.22767	2.16839	1.14171	1.00453	1.98265	2.24907	0	0	2.50966	0	1.99959	0	0	2.24352	2.20559	0	2.15266	1.15177	0	1.29276	2.06855	1.6275	2.13677	2.39672	1.31487
chr17:8118864-8127762	Tagap	0.968596	1.11682	0.985541	1.01432	2.77682	2.32478	1.09943	2.63832	1.12786	1.104	1.14875	1.13139	1.01013	1.23104	1.01693	1.31079	1.12877	1.08177	2.5593	1.15886	0.949046	0.972161	1.1619	1.12778	1.15017	1.08667	1.08801	1.3137
chr11:114892799-114899083	Gm11710	1.26299	1.31006	1.43904	1.07451	1.5938	1.25213	1.62413	1.05971	1.30418	0.626873	0.938648	1.13993	0.893053	1.32504	1.18482	0.908007	1.16383	1.95851	1.72754	3.38485	1.55117	0.895815	1.54636	1.63165	0.864045	0.841574	0.882349	1.31054
chr7:113043632-113102481	Gm4070	0.206311	0.639931	0.141585	2.71628	0.173445	0.741081	1.62762	3.06115	1.04364	1.16056	1.10835	0.632791	0.99281	1.20547	1.07285	1.01412	1.72031	1.15512	1.2682	1.15666	1.17	1.56957	1.26138	2.2582	2.09327	2.10285	2.0852	1.31032
chr7:113043632-113102484	Gvin1	0.206312	0.639917	0.141582	2.71624	0.17344	0.74107	1.62758	3.06108	1.0436	1.16054	1.10832	0.632769	0.992782	1.20545	1.07286	1.01411	1.72031	1.15514	1.26819	1.15663	1.16997	1.56952	1.26133	2.25811	2.09328	2.10284	2.08519	1.3103
chr10:81364655-81393225	Zfp781	1.25211	1.29156	1.25148	1.23717	0.678206	1.09404	1.07019	1.36069	1.35699	1.3361	0.774562	1.18638	1.29053	1.36792	1.23678	1.30075	1.30583	1.04791	1.28809	1.28914	1.68339	1.30493	1.18995	1.0781	1.99539	2.04102	1.98516	1.3072
chr4:73532973-73537016	Gm11758	2.14472	1.83019	1.38193	1.17796	1.29218	2.8831	1.20345	1.28529	1.14964	1.5757	1.17129	1.04231	0.80235	2.05049	1.00417	1.53545	0.814564	1.08372	1.364	0.865354	1.25027	0.592062	1.13535	0.560877	1.26522	1.44197	1.36212	1.30614
chr4:73532969-73537016	Gm11757	2.14338	1.82912	1.38116	1.17728	1.29154	2.88223	1.20277	1.28455	1.14873	1.5747	1.17032	1.04159	0.801741	2.04986	1.00364	1.53474	0.814261	1.08328	1.36326	0.864678	1.24955	0.591623	1.1347	0.560667	1.26455	1.44127	1.36134	1.30543
chr4:73532968-73537016	Gm13871	2.14305	1.82885	1.38097	1.17711	1.29138	2.88202	1.2026	1.28436	1.1485	1.57445	1.17007	1.0414	0.801589	2.04971	1.00351	1.53456	0.814185	1.08317	1.36307	0.86451	1.24937	0.591514	1.13454	0.560614	1.26439	1.44109	1.36114	1.30525
chr7:113300049-113358854	Gvin1	0.209704	0.643228	0.13636	2.66868	0.17391	0.683467	1.64788	3.18618	1.02895	1.13259	1.08935	0.595816	0.999146	1.20917	1.08228	1.04183	1.67716	1.14351	1.23679	1.09801	1.07347	1.624	1.21564	2.27377	2.04624	2.10323	2.19837	1.3044
chr7:113300049-113358851	Gm4070	0.209713	0.643249	0.136357	2.66858	0.173888	0.683441	1.6478	3.18608	1.02888	1.13256	1.08934	0.595809	0.999142	1.20916	1.08227	1.04179	1.67708	1.14344	1.23673	1.09799	1.07343	1.62394	1.2156	2.27371	2.04624	2.10327	2.19837	1.30437
chr4:42349016-42354418	Ccl27b	1.15377	1.92831	2.23556	1.79186	1.38777	0.736067	1.8463	2.96529	0.601813	1.4197	0.912279	0.941504	0.985723	0.838227	0.912754	1.01711	1.66588	1.44187	2.16661	1.62337	1.21098	1.2273	1.03295	1.07972	0.745198	0.691	0.651113	1.30408
chr10:81326678-81343831	Zfp433	1.24863	1.21539	1.23324	1.19863	0.58866	1.20516	1.01827	1.33148	1.34151	1.30577	0.670208	1.30096	1.31194	1.34206	1.286	1.2773	1.23404	1.16686	1.19845	1.23737	1.62311	1.20319	1.17283	0.98316	2.13868	2.18913	2.17347	1.30354
chr7:7738861-7772578	Vmn2r35	0.994064	1.57247	1.20166	1.34752	1.72693	1.1433	1.05355	1.12515	1.23999	1.46653	1.34629	1.24455	1.55234	1.67908	1.36641	1.49591	1.13365	1.23914	1.47303	1.05534	1.21347	1.26915	1.13889	1.14371	1.25222	1.39239	1.26417	1.30114
chr4:42024167-42029569	Ccl27b	1.05846	1.8957	2.1663	1.85807	1.24654	0.666674	1.69851	3.01282	0.749926	1.3177	0.923101	0.895674	1.02818	0.778496	1.02231	0.921052	1.70784	1.56158	2.21807	1.51345	1.25661	1.24469	1.04224	1.27839	0.690854	0.751862	0.593406	1.29994
chr2:10408279-10408366	Mir669a-10	1.11227	0.930857	1.3478	1.29754	0.458049	0.851796	0.824885	0.646847	1.12573	0.589079	1.82505	0.421142	1.04372	0.640566	1.09111	0.585676	1.98827	1.3868	1.26912	0.982375	1.68144	1.2239	2.30541	1.27781	2.68411	2.65293	2.77006	1.29683
chr2:10408273-10408368	Mir669a-2	1.11227	0.930857	1.3478	1.29754	0.458049	0.851796	0.824885	0.646847	1.12573	0.586569	1.82477	0.421142	1.04372	0.640566	1.09111	0.585676	1.98827	1.3868	1.26912	0.982375	1.68144	1.2239	2.30541	1.27781	2.68411	2.65293	2.77006	1.29672
chr2:10408275-10408372	Mir669a-1	1.11227	0.930857	1.3478	1.29754	0.458049	0.851796	0.824885	0.646847	1.12573	0.56607	1.81159	0.421142	1.04372	0.640566	1.09111	0.585676	1.98827	1.3868	1.26912	0.982375	1.68144	1.2239	2.30541	1.27781	2.68411	2.65293	2.77006	1.29548
chr10:81167569-81184721	Zfp433	1.17523	1.19217	1.2234	1.22481	0.633397	1.02379	1.19426	1.31739	1.27159	1.34691	0.665289	1.24208	1.21908	1.44884	1.35337	1.25435	0.974981	1.21978	1.28003	1.21933	1.83579	1.21744	1.12095	1.07318	2.21478	2.06932	1.92927	1.2941
chrX:34868165-34872882	Rhox2c	1.45993	1.29987	1.23854	1.4752	1.7855	2.12681	1.63057	1.48184	0.867571	1.34415	1.16922	0.911211	1.95798	0.905751	1.79389	1.32403	1.50215	1.01359	0.916796	0.286322	0.761502	0.0126855	1.87043	0.205163	2.28375	1.0108	2.2997	1.29389
chr11:82815659-82834312	Slfn8	1.06693	2.48503	2.4582	1.59956	1.99955	2.00723	1.95635	1.60728	0.704912	0.699962	1.65364	1.0085	1.61227	0.756386	1.33944	1.81621	1.00881	0.995118	2.53553	1.04081	0.652333	2.06077	1.67486	0.0451738	0.0313174	0.0296185	0.0295364	1.29168
chr11:82815659-82834224	Slfn8	1.06541	2.47901	2.45438	1.59383	2.00219	2.00655	1.95369	1.60497	0.702755	0.697423	1.653	1.00863	1.61037	0.754547	1.33768	1.81159	1.00829	0.995713	2.531	1.03818	0.651508	2.06065	1.67387	0.0453879	0.0314658	0.0297588	0.0296764	1.29006
chr15:77307476-77321499	Apol10a	1.82536	1.89706	1.80989	1.80995	0.257331	1.03473	1.02439	1.0918	1.85137	1.18753	1.85226	1.78177	1.09806	1.20033	1.88999	1.13521	1.12487	0.200158	0.193868	1.82686	1.20198	1.02726	1.10019	0.228325	1.65424	1.73095	1.76952	1.28908
chr7:113329256-113333613	Gm18853	0.00519041	0.551756	0.0117023	2.62926	0.0297941	0.561889	1.78355	3.43632	1.08955	1.01844	1.12023	0.49047	1.0176	1.16358	1.20713	1.07327	1.79214	1.1271	1.11316	1.14171	1.00537	1.58905	0.977652	2.2783	1.99842	2.26461	2.32311	1.2889
chr7:113329265-113333613	Gm17757	0.00520115	0.551543	0.0117265	2.6291	0.0298557	0.561723	1.78398	3.43754	1.0897	1.01794	1.12019	0.48939	1.01772	1.1631	1.20764	1.07247	1.79174	1.12661	1.11195	1.14203	1.00553	1.58854	0.977259	2.27782	1.9981	2.26428	2.32096	1.28865
chrX:34884374-34888286	Rhox3c	1.53064	1.21634	1.29131	1.1316	1.17459	1.77229	1.08999	1.82519	1.49764	0.68898	0.921742	1.32877	0.84943	0.429074	1.25183	0.621848	1.71957	1.15354	0.911335	0.377678	0.997512	0.0353053	2.33739	0.207487	3.4266	1.60845	3.26499	1.28375
chr13:22817552-22818491	Vmn1r207-ps	2.15345	2.30519	1.87963	1.83512	1.80639	1.88662	1.93131	1.1897	0.87303	1.35731	2.24513	2.08806	1.67629	2.46698	1.08624	1.68286	1.87918	1.07979	0.0848935	0.0318099	1.00376	0.113107	0.0645088	1.80058	0.0406325	0.0310104	0	1.28121
chr4:42664135-42669537	Ccl27b	1.04124	1.93447	2.17317	1.61625	1.26276	0.670322	1.60587	3.12725	0.655949	1.52996	1.00513	0.82362	1.07375	0.733889	1.06348	0.957323	1.66141	1.51092	2.18616	1.61578	1.20195	1.07168	0.997997	1.08618	0.637718	0.638001	0.694393	1.28062
chr4:41902018-41925853	4933409K07Rik	1.28904	1.76425	1.80923	1.60271	1.68865	1.25015	1.65969	1.76415	0.683692	1.12851	0.923464	0.781584	1.12244	0.967621	1.10495	0.871261	1.78157	1.50008	1.95775	1.42526	1.2981	1.66592	1.05009	1.21497	0.774118	0.726044	0.760225	1.2802
chr4:42452732-42476567	4933409K07Rik	1.32111	1.793	1.83834	1.56712	1.61409	1.23121	1.62328	1.81129	0.678239	1.1431	0.950716	0.804546	1.14833	1.02372	1.08804	0.852055	1.775	1.45852	1.90284	1.36997	1.29433	1.76648	1.05011	1.17937	0.757786	0.764932	0.753644	1.28004
chrX:151358554-151360658	Magea6	1.11259	0.982059	0.995955	1.08134	1.14088	0.867545	1.00033	1.02188	1.03997	1.12468	1.18121	1.24856	1.44768	1.1544	1.55067	1.08792	1.03993	1.03219	0.983834	1.04131	2.03044	2.02654	1.0779	1.91201	2.27529	1.02787	2.03405	1.27848
chr2:176583304-176593409	Gm14295	1.48042	1.24605	2.64399	2.86299	1.30579	2.01887	0.482003	1.56609	0.986403	0.982502	1.12014	1.13091	0.775	0.945283	1.21094	1.2387	0.789557	1.16877	1.13444	1.3257	1.14539	0.789301	2.03355	1.81624	0.768836	0.715514	0.733835	1.27471
chr4:73518127-73522170	Gm11758	2.12864	1.85072	1.32106	1.16757	1.12999	2.57843	1.07655	1.3115	1.11351	1.50808	1.1913	0.930139	0.865324	1.90794	0.939292	1.44417	0.897826	0.986334	1.41154	0.762835	1.11491	0.66712	1.09223	0.605042	1.38878	1.40555	1.36232	1.26514
chr4:73518123-73522170	Gm11757	2.12773	1.85039	1.32069	1.16727	1.13006	2.57797	1.0763	1.31129	1.11344	1.50751	1.19054	0.929858	0.864725	1.90712	0.939107	1.4435	0.897494	0.986387	1.41152	0.762688	1.1145	0.666679	1.09154	0.604786	1.38915	1.40588	1.36244	1.26484
chr4:73518122-73522170	Gm13871	2.1275	1.8503	1.3206	1.1672	1.13008	2.57785	1.07623	1.31123	1.11342	1.50737	1.19035	0.929788	0.864576	1.90692	0.939061	1.44333	0.89741	0.986401	1.41152	0.762652	1.1144	0.666569	1.09137	0.604722	1.38924	1.40596	1.36247	1.26476
chr17:6853664-6860548	Dynlt1c	0.647165	0.932888	0.662833	0.993791	2.74353	2.30268	1.18063	2.49649	0.896702	0.820523	1.07396	0.952148	0.80909	0.640757	0.621701	0.660698	1.2914	1.20207	3.08803	1.63525	1.07891	1.82262	1.09434	1.22312	1.02655	1.09026	1.14556	1.26421
chr6:85710624-85712474	Cml3	1.19547	1.44097	1.54833	1.24506	1.29432	1.4871	1.55874	1.27661	1.30855	0.923178	1.40769	1.429	0.872487	1.79404	0.710243	0.82611	1.78324	1.91676	1.32482	1.46484	1.41403	1.2749	1.39787	2.24449	0.459625	0.250868	0.262883	1.26342
chrX:7944103-7952514	Ssxb9	1.04272	1.04727	1.00047	0.950968	0.959972	0.931064	1.0089	0.981765	1.01962	1.06221	0.984222	1.04026	1.01306	1.86552	1.04166	0.996219	1.0321	1.07546	0.947368	0.985772	0.94191	1.01953	0.994242	1.07581	3.9986	1.90101	3.16855	1.26245
chrX:34789913-34798973	Rhox3a	0.968114	1.36273	1.26311	0.784258	1.19497	1.54605	0.866108	1.18032	0.949905	1.92043	0.888212	0.930336	2.53944	1.32782	2.64583	1.50715	1.01217	0.565116	0.934285	0.862709	0.738933	0.0667155	0.49988	0.290787	2.90817	1.33743	2.96962	1.2615
chr7:10092186-10116991	Vmn2r47	1.14298	2.00257	1.47745	1.55707	2.0647	0.985165	1.1295	1.31639	1.07546	1.5814	1.00434	0.889074	1.45368	1.47615	0.867636	1.16688	0.841672	1.20867	1.34103	0.870214	1.04025	1.24264	0.902499	0.999123	1.40114	1.49073	1.52933	1.2614
chrX:7904549-7913361	Ssxb10	1.01492	0.876858	0.890954	1.09332	1.03357	1.02367	1.04565	1.01126	1.06193	1.07207	0.960649	0.974293	1.07912	1.44006	1.09236	1.03417	0.975581	1.0001	1.0144	0.954214	0.949979	0.998271	1.04353	1.03771	4.19617	2.04709	3.0699	1.25896
chr17:6853656-6860656	Dynlt1f	0.64472	0.928852	0.65632	0.987195	2.70764	2.27123	1.17667	2.47081	0.88721	0.812799	1.06436	0.948818	0.812172	0.633299	0.622104	0.654153	1.28626	1.21067	3.05987	1.62616	1.07662	1.82018	1.0898	1.21847	1.01954	1.09139	1.1431	1.25631
chr17:6851323-6860656	Dynlt1f	0.694771	0.933679	0.727258	0.977534	2.58887	2.20149	1.12924	2.40206	0.904031	0.811987	1.11837	0.988937	0.831695	0.693894	0.724343	0.671398	1.26806	1.22354	2.88462	1.68777	1.08089	1.77841	1.06404	1.21596	0.991605	1.08874	1.14124	1.25276
chr11:114882041-114888326	Gm11710	1.25311	1.17469	1.35123	1.04214	1.76985	1.27234	1.89211	1.06112	1.25708	0.682218	0.88059	1.13321	0.921035	1.38391	0.99802	0.774611	1.15781	1.71887	1.5662	2.64722	1.35189	0.855059	1.43542	1.46428	0.856905	1.03484	0.884762	1.25261
chr4:41774206-41775337	Ccl21c	0.992858	1.60445	2.10512	1.67485	1.52324	0.777814	1.92767	2.92097	0.513643	0.810688	0.793027	0.506179	0.811568	0.694849	0.879358	0.430174	1.85676	2.01091	2.16513	1.07037	1.67455	1.08409	0.943541	1.54543	0.952568	0.7369	0.794747	1.25191
chr5:145790468-145793633	Gm4871	0.861019	1.4443	1.06679	0.93448	0.982702	0.810075	0.916721	0.895135	1.59006	1.56957	0.915704	1.76743	0.958201	1.18775	1.85019	1.07449	1.89699	1.47361	0.794203	0.8425	0.756934	0.900694	0.741115	0.928076	2.07861	2.32768	2.20635	1.25079
chr9:21092907-21095653	Cdkn2d	1.15261	1.20297	1.16298	1.10384	1.15302	1.52846	1.30845	1.25478	1.29682	1.38151	1.30658	1.25862	1.22284	1.2914	1.33276	1.21289	1.28222	1.30361	1.26373	1.29457	1.33443	1.2393	1.17715	1.21871	1.38189	0.926565	1.11048	1.24827
chrX:151383005-151384112	Magea3	1.13138	0.957509	1.00084	1.13307	0.772036	1.02231	1.06001	1.09243	1.06446	1.07293	1.01038	0.99592	1.93528	1.07521	2.21032	0.84688	1.14427	1.21924	1.1328	1.22775	1.17641	1.0293	1.02061	1.32162	2.22098	1.17232	2.55291	1.24441
chr3:22150291-22150529	Rprl2	0.888993	2.07689	1.27819	1.4417	0.997153	1.7304	0.886769	1.49632	0.426799	0.567147	1.87926	1.72558	1.84742	2.01809	0.518338	0.0603176	0.816983	2.39948	1.80581	1.76582	1.4815	2.18785	0.810513	1.59159	0.62831	0.0583731	0.161057	1.24247
chrX:51925387-51942193	Gm16405	1.08513	1.10699	1.06209	0.91727	1.51457	1.24516	1.29759	0.951009	0.992431	0.947315	1.1166	0.979361	0.947999	1.11087	1.23394	1.18448	1.79918	0.994065	0.805312	1.60736	1.23548	1.22344	1.06032	1.78202	2.10398	1.05913	2.14543	1.24106
chrX:10898548-10899057	Gm14482	0.861015	0.897839	1.15505	0.938434	0.787803	0.620307	1.15903	0.99318	1.47915	0.977799	1.004	1.00395	0.816204	0.501713	1.43404	0.954097	1.5788	1.39224	1.52068	1.42389	1.28173	1.63028	1.77218	1.34335	2.68138	0.862634	2.42937	1.24075
chr4:41774242-41775337	Ccl21b	0.981396	1.60015	2.07628	1.5978	1.53291	0.774878	1.91105	2.92288	0.509149	0.811875	0.804351	0.515384	0.814098	0.690258	0.855254	0.425278	1.78546	1.93342	2.10791	1.05571	1.6693	1.07717	0.955703	1.53486	0.965926	0.748603	0.802716	1.23925
chrX:34794872-34798793	Rhox3e	1.26038	1.60242	1.48987	0.750318	1.22853	1.65933	0.863523	1.30538	0.850999	1.77954	0.768324	0.865224	2.59746	1.27038	2.69521	1.42406	0.881244	0.540481	0.868056	0.533974	0.674999	0.0424782	0.50665	0.144905	2.8255	1.21689	2.80566	1.23896
chr7:20779058-20779982	Vmn1r143	1.13822	0.781348	0.981101	0.894938	0.518552	0.685591	1.27959	0.729477	2.08628	0.576213	0.500398	2.60927	1.45343	2.93377	0.815758	1.02084	0.317117	1.15319	3.10284	0.581297	1.39424	1.06164	1.27217	1.96277	0.412827	2.11534	1.05698	1.23834
chrX:35017401-35022193	Rhox4f	1.39403	1.98903	1.91072	0.69355	0.957014	1.49052	0.637416	1.28764	1.23602	1.33179	0.97553	1.22891	1.02383	1.43019	1.14472	1.31954	0.956686	1.22621	0.65536	0.871938	1.19977	0.732033	0.612396	0.848549	2.58167	1.28454	2.41427	1.23829
chr2:10415141-10415214	Mir467a-1	1.04707	1.38256	0.771396	1.42792	0.166201	1.53121	0.549101	0.377141	0.988763	0.512602	0.610572	0.481212	0.656991	1.24227	0.73788	0.718618	2.38242	1.75714	1.06766	1.05701	1.67901	1.28273	1.83479	1.21899	2.75414	2.95099	2.09752	1.23274
chr7:21657274-21658198	Vmn1r116	0.957172	1.11907	1.55532	0.50312	0.983535	1.12341	1.0264	0.800875	1.82514	0.367386	0.491779	2.77419	1.28339	2.37192	0.713046	0.618186	0.204292	1.06082	1.72309	1.65402	1.63421	1.88067	1.49772	2.15028	0.324955	1.82735	0.80973	1.23263
chrX:88725464-88726499	Gm5072	1.34879	1.21334	1.42253	1.04021	1.31681	1.4298	1.50366	1.50195	1.18684	1.1953	1.17087	1.29185	1.31927	1.25366	1.24045	1.07942	1.05109	0.903668	1.04176	0.85379	0.973215	0.908359	0.687349	0.609542	2.53123	1.04524	2.10991	1.23074
chrX:51834384-51851190	Gm16405	1.1085	1.04514	1.05786	0.896719	1.49327	1.27055	1.28156	0.971649	0.909049	0.941372	1.07944	0.999625	0.911374	1.09627	1.23851	1.11561	1.84719	0.993705	0.835743	1.58888	1.22103	1.19175	1.07767	1.77949	2.10595	1.03455	2.1207	1.23012
chr2:10415136-10415219	Mir467a-2	1.03444	1.34704	0.763302	1.42792	0.166201	1.53121	0.564242	0.369602	0.979713	0.512602	0.610572	0.478517	0.662146	1.24227	0.73788	0.718618	2.38242	1.75714	1.06766	1.05219	1.68062	1.28156	1.81392	1.22461	2.74515	2.9155	2.10845	1.22872
chrX:70479414-70488469	Xlr4c	1.93988	0.975282	1.07564	1.93407	1.07046	1.12652	1.07486	1.07243	1.0327	0.70419	0.970782	0.899874	1.10986	0.883529	1.17973	1.64103	1.07426	1.06267	1.15286	1.1173	1.05204	1.09136	1.09055	1.01804	2.19016	1.31251	2.31307	1.22836
chr7:8557271-8583081	Vmn2r36	0.629838	1.84811	0.949311	1.41033	1.91617	0.716038	0.60475	1.19488	1.41957	1.12907	1.06766	1.2722	1.42617	1.35916	1.07157	1.28188	0.840277	1.41047	1.37871	0.825573	1.05144	1.23797	0.913562	1.04317	1.67696	1.74812	1.72995	1.22789
chr4:60885338-60889318	Mup13	1.47113	0.887183	0.715074	1.38296	1.21909	1.62627	1.19716	1.5683	0.63296	1.07618	0.504286	0.640653	0.567629	0.492584	0.519141	0.534625	1.08834	1.76737	2.1375	2.00562	2.09266	2.14257	2.12658	1.49319	1.0775	1.03835	1.1103	1.22649
chr5:96204888-96233249	E330014E10Rik	0.629193	1.06675	0.678974	0.985696	1.94066	1.26218	1.94957	1.41806	0.550464	1.26145	0.891702	1.82125	1.18583	1.2339	2.15721	2.413	0.0146248	0.945801	0.306468	0.640029	0.896745	0.808994	0.492826	0.81367	2.5869	2.50542	1.65602	1.22642
chr5:138293374-138299277	Pilrb1	1.57774	1.55647	1.14802	1.71549	1.70788	2.07552	1.76497	2.05601	1.2067	0.955245	1.526	1.19646	1.25573	0.555176	1.32798	1.33432	1.14075	0.728053	1.12282	1.18133	0.882656	0.859259	1.16227	1.16304	1.04577	0.119288	0.683677	1.22402
chr17:6648841-6654956	Dynlt1c	0.479684	0.961197	0.548465	0.867772	2.40697	2.06999	1.08648	2.32989	0.835275	0.838818	1.02118	0.884263	0.813516	0.668203	0.683837	0.587477	1.33555	1.11821	2.59496	1.87441	1.11561	2.1132	1.06576	1.32912	1.12192	1.2323	1.06328	1.22398
chr10:129411660-129412605	Olfr247	1.13453	1.25324	0.880801	1.22818	1.3709	1.38402	1.2061	1.17471	1.15347	1.45202	1.32025	1.56401	1.10172	1.51274	1.18025	1.40577	0	1.43448	1.06646	1.68058	1.05948	1.24167	1.46574	1.23478	1.13864	1.23792	1.11812	1.22224
chr14:6804350-6811001	Gm3317	0.766344	0.958347	1.13326	0.909056	1.3278	0.671101	1.14177	1.23894	0.545273	1.50752	1.3689	1.1805	0.832287	1.01787	1.2468	1.29041	0.780954	1.20919	1.27784	1.68571	1.18108	0.984845	1.3423	1.41701	1.87815	2.1173	1.98681	1.22212
chrX:10898578-10899020	Gm14478	0.856769	0.844587	1.15219	0.907015	0.796495	0.602754	1.12951	0.945549	1.50385	0.994423	0.97236	0.953714	0.814164	0.460198	1.40259	0.950059	1.51975	1.37556	1.49611	1.40077	1.29985	1.60194	1.70161	1.32285	2.66983	0.861367	2.42307	1.2207
chr7:7829363-7855173	Vmn2r36	0.580726	1.82402	0.948916	1.39901	1.94719	0.747649	0.597494	1.1486	1.36606	1.12224	1.09404	1.2482	1.44214	1.30575	1.10127	1.23081	0.878223	1.37455	1.39962	0.888816	1.03686	1.19589	0.882997	1.03783	1.68181	1.75306	1.68334	1.21915
chr10:129420535-129421480	Olfr247	1.07562	1.33468	1.04184	1.35244	1.67396	1.18942	1.32178	1.07217	1.38964	1.22282	1.13585	1.35775	1.6245	1.24652	1.13615	1.30054	0	1.3125	1.02404	1.54183	1.06561	1.36749	1.12547	1.18575	1.26695	1.05124	1.4254	1.21637
chr4:42786391-42787523	Ccl21a	1.13614	1.22193	1.61236	1.17121	0.782079	0.842542	1.69827	2.06163	0.692896	0.781423	0.942786	0.935013	0.928567	0.677806	0.858212	0.975396	2.25344	1.67208	1.23394	1.25299	1.35137	2.04976	1.07964	1.45846	1.00524	0.912387	1.2054	1.21455
chrX:136476066-136533134	Rbm41	1.03458	1.09309	1.08607	1.12721	1.13294	1.17977	1.10468	1.093	1.08307	1.11812	1.06805	2.00016	1.00968	2.07497	1.15288	1.09636	1.03307	1.04667	0.99173	1.01375	1.03639	1.01176	1.0143	1.05393	2.02748	1.06317	2.0459	1.21455
chr4:42786391-42787525	Gm1987	1.13631	1.22248	1.61156	1.17073	0.781753	0.842221	1.69767	2.06067	0.693559	0.781752	0.942507	0.935168	0.928958	0.678736	0.858156	0.976189	2.25136	1.67119	1.23514	1.25283	1.35104	2.04862	1.07939	1.4579	1.005	0.912427	1.20609	1.21442
chr17:6648832-6655064	Dynlt1f	0.474773	0.955178	0.541536	0.869127	2.37406	2.04757	1.07603	2.2975	0.82295	0.825283	1.00693	0.874265	0.804281	0.661695	0.679805	0.583119	1.32859	1.11463	2.56781	1.85464	1.11094	2.11372	1.06258	1.31927	1.12557	1.22861	1.05823	1.21403
chr17:6806495-6812609	Dynlt1c	0.57566	1.09421	0.606278	0.927629	2.39877	1.99904	1.11337	2.35987	0.705046	0.807322	0.950147	0.858936	0.772951	0.653651	0.624734	0.498165	1.34728	1.1482	2.55817	1.98626	1.17676	2.03888	1.08216	1.26969	0.953568	1.14445	1.10176	1.21307
chr17:36315721-36318309	Gm6623	1.38498	2.33759	2.18734	1.95109	1.33114	0.301068	2.83999	0.944034	1.11325	0.977973	0.620309	1.0453	0.0499896	1.07452	0.474806	1.99556	0.357864	1.13328	0.157861	1.87859	0.525044	0.254071	0.225127	0.708506	2.22373	2.33191	2.31833	1.21271
chr11:58315099-58316056	Olfr331	0.909646	1.30488	0.636978	1.22428	1.20313	0.936048	1.21264	0.96073	1.43371	1.7673	1.16895	1.36154	1.38447	1.551	1.34215	1.44777	1.36213	1.38776	1.20014	1.24949	1.22258	1.10219	1.57523	0.945036	0.908486	1.12707	0.787546	1.21159
chrX:34784986-34831309	Rhox2e	1.1496	1.20746	1.1618	0.843752	1.21263	1.77051	0.888429	1.32983	1.11019	1.64433	1.11474	1.1088	2.29103	1.20173	2.20792	1.42633	1.07991	0.559527	1.0052	0.884754	0.70572	0.0766633	1.1055	0.349978	2.15905	1.02008	2.08935	1.21129
chr14:44579490-44579934	Ang6	1.76519	4.24397	3.66937	2.40276	2.46749	3.05537	1.07953	3.38538	0	0.0351857	0	0.0296821	0.0170429	0.0342437	0.0305101	1.08699	2.17422	0.0302729	1.03391	0.996733	1.02674	1.0235	1.01376	1.94971	0.0213894	0	0.0180616	1.20707
chr17:6806387-6812617	Dynlt1f	0.572422	1.08378	0.605673	0.922599	2.3799	1.97178	1.10333	2.32389	0.694242	0.79953	0.939402	0.852376	0.766914	0.649972	0.620981	0.492506	1.34533	1.14561	2.53127	1.97116	1.17042	2.04188	1.07046	1.26547	0.95315	1.14076	1.09694	1.20414
chr9:39233709-39234654	Olfr952	0.989662	1.33408	1.00621	1.10282	2.01318	0.0917304	2.00063	1.1992	0.870317	1.64804	2.34579	0.111936	0.952721	0.72664	1.16281	0.101359	2.29216	0.0732884	1.18296	2.43956	2.09354	0.116739	1.05888	0.130122	2.37178	1.95608	1.06377	1.20133
chr7:23574877-23575801	Vmn1r158	0.130552	1.07515	0.191257	1.32409	1.86164	1.24235	0.238608	0.96296	0.706417	2.27602	1.13914	0.581866	2.25238	0.755667	1.92987	1.06133	0.133098	3.0684	2.34861	0.00958535	1.29624	1.04829	2.21724	2.14352	0.164853	2.16206	0.0988909	1.20074
chr14:5266666-5273317	Gm3317	0.740727	0.876908	1.10673	0.946988	1.16813	0.732065	1.06439	1.18375	0.504575	1.57914	1.23913	1.13021	0.877787	1.00412	1.25213	1.34386	0.879269	1.02875	1.1435	1.67692	1.17198	0.958033	1.35562	1.49438	1.93879	1.97651	2.04273	1.20063
chr17:6600795-6610127	Dynlt1f	0.65599	0.978447	0.718495	0.946845	2.58407	2.16825	1.09486	2.36912	0.798008	0.820663	1.02524	0.992434	0.793337	0.625039	0.572581	0.578818	1.2274	1.11018	2.64183	1.55601	1.02958	1.75686	1.03982	1.12588	0.904596	1.11685	1.14204	1.19901
chrX:136424049-136533134	Rbm41	1.02341	1.06286	1.06341	1.11564	1.08677	1.10993	1.05595	1.04365	1.05806	1.09175	1.06144	1.96512	1.01102	2.02851	1.11611	1.07348	1.0349	1.04215	1.01297	1.02168	1.0231	1.02407	1.02584	1.05414	2.03219	1.03045	2.04078	1.19664
chr13:12706332-12742662	Gpr137b-ps	1.18865	0.662236	1.22778	1.36164	0.703678	1.80021	0.644094	0.633068	1.07563	1.31829	1.44924	0.68542	1.54186	1.21507	1.14162	1.85564	0.923606	1.10694	1.08498	1.08336	0.888401	0.949614	0.867655	0.711446	1.0106	1.53158	3.63388	1.19616
chr11:73600441-73601377	Olfr390	1.20084	1.56987	0.19042	0.298848	1.49962	0.319642	2.24869	0.364509	2.07571	2.23086	2.20778	2.40245	1.96553	2.47395	1.95197	1.89722	0.299154	0.215539	0.132511	0.237549	1.10231	0.10916	1.34505	0.188317	1.06857	1.24633	1.39988	1.19416
chr17:6600903-6607786	Dynlt1c	0.652564	0.997332	0.671103	0.923659	2.65457	2.18618	1.10415	2.47544	0.67694	0.742346	1.0268	0.952247	0.716576	0.567666	0.502693	0.566087	1.2189	1.07925	2.76384	1.43178	1.03089	1.74057	1.07017	1.12437	0.906716	1.13308	1.16347	1.18813
chr4:42231044-42232176	Ccl21a	0.963736	0.964559	1.32051	1.48875	0.785367	0.723677	1.64892	1.65217	0.660973	0.869093	0.69591	0.987129	1.09638	0.744812	0.944533	1.16955	2.19085	1.83066	1.37768	1.43095	1.50864	1.89885	1.25043	1.22998	0.979647	0.795958	0.859363	1.18774
chr4:42231042-42232176	Gm1987	0.963613	0.964326	1.32088	1.48758	0.785702	0.723857	1.64781	1.65201	0.660864	0.869334	0.69701	0.987819	1.0964	0.74497	0.944602	1.17079	2.19037	1.83022	1.37764	1.43098	1.5075	1.89835	1.25095	1.22905	0.979766	0.795982	0.859307	1.18769
chr10:81274930-81289235	Gm10778	0.968048	1.05029	1.005	1.0995	0.759606	0.87304	1.02543	1.12897	1.1131	1.12642	0.942476	1.18893	1.11302	1.2781	1.31489	1.04828	0.857888	1.73929	0.971945	1.06519	1.13131	0.9119	0.940684	0.995147	1.9777	2.15135	2.21403	1.18487
chr12:56256326-56365681	Srp54a	1.19593	0.890045	1.24463	1.24747	1.22262	1.33275	1.20161	1.19236	0.994374	1.57698	1.22434	0.87487	0.546191	0.84878	0.910805	1.24395	1.25051	1.22708	1.23993	1.23428	1.96938	1.22078	1.27288	1.25331	1.17949	1.12744	1.19664	1.1822
chr17:6600795-6607794	Dynlt1f	0.64733	0.985975	0.667323	0.920214	2.64923	2.15996	1.09577	2.44669	0.667949	0.734687	1.01755	0.945574	0.713325	0.568041	0.50506	0.561342	1.21995	1.07938	2.74306	1.42327	1.03282	1.73341	1.06553	1.12328	0.906361	1.12769	1.16356	1.18164
chr14:6451733-6458384	Gm3317	0.729016	0.86325	1.05236	0.978991	1.15136	0.644812	0.982471	1.12132	0.482379	1.48159	1.28473	1.09311	0.807214	0.993445	1.30157	1.30092	0.836543	1.10649	1.30672	1.52793	1.12571	0.970579	1.26493	1.3892	1.9032	1.98664	2.11886	1.17798
chr9:39201377-39202322	Olfr951	0.759349	1.07482	1.19525	1.07404	1.38206	0.194895	1.3922	1.05664	1.08914	1.80872	2.37458	0.119712	0.816568	1.29684	0.954313	0.0202106	2.30146	0.0824494	0.836997	2.12401	2.41601	0.172127	1.34277	0.0815658	2.23858	2.31087	1.06091	1.16952
chr3:88187748-88188386	Bglap	0.348795	2.75079	1.17241	0.0645127	1.3538	1.31882	0.0437072	0.0697436	0.180934	1.40541	0.964998	0.323424	1.31201	0.183879	0.399661	2.26287	2.05688	1.65143	2.09443	1.98629	1.2179	1.99059	2.39656	2.67509	0.480301	0.437732	0.393039	1.168
chr4:42248503-42250497	Ccl19	1.10312	1.27881	1.3431	0.939177	1.23777	1.0572	1.38572	2.01022	0.982664	1.53224	0.861165	0.872087	0.689857	1.18388	0.710656	1.0676	1.28433	0.911942	1.01272	1.32569	1.28848	1.70441	1.08325	0.996594	1.1266	0.934379	1.41351	1.16064
chr3:98356473-98367961	Hsd3b4	1.14224	0.980411	1.26647	1.26853	0.810517	1.1635	0.39362	1.32613	1.10984	1.27287	1.23692	1.27224	1.25231	1.25123	0.869636	1.25977	0.948087	1.20464	1.06006	1.12783	2.33824	1.13133	1.43156	1.00886	1.06875	1.09033	1.02001	1.15948
chr8:22301955-22302928	Defa22	1.00419	1.3118	0.245236	1.54722	1.78376	0.380155	0.971909	0.210847	2.80501	2.31367	0.963124	1.5229	1.61246	1.08217	0.305122	0.798823	1.25999	1.28146	0.21798	2.25493	1.13109	2.09732	1.04871	2.07225	0.539956	0.495797	0.0414653	1.15923
chr3:98356465-98367932	Gm10681	1.14261	0.980402	1.26479	1.26818	0.808353	1.16272	0.392367	1.32603	1.10927	1.27249	1.23639	1.27163	1.25185	1.25013	0.869182	1.25977	0.946553	1.20426	1.05872	1.12754	2.33834	1.13084	1.4302	1.00783	1.06726	1.08873	1.01799	1.15868
chr8:22776268-22776440	Defa4	1.28013	0.396051	0.714547	0.383785	2.4427	0.668285	1.93346	0.410137	0.937893	1.2827	1.37223	2.96819	1.70566	1.04943	0.567883	2.53267	0.288431	0.395529	1.66046	1.24056	1.16726	2.25625	1.59185	1.23777	0.100926	0.396767	0.292358	1.15829
chr3:98356473-98367866	Hsd3b4	1.14467	0.980582	1.26124	1.26723	0.802299	1.16097	0.390125	1.32552	1.10826	1.27171	1.23625	1.27105	1.25066	1.24864	0.868784	1.26064	0.943121	1.20361	1.05632	1.12796	2.33861	1.13096	1.42817	1.00705	1.06392	1.08565	1.01357	1.15732
chr3:98303002-98314490	Hsd3b4	1.12328	0.935539	1.18876	1.23741	0.78006	1.17452	0.377695	1.30462	1.03336	1.27409	1.20635	1.29421	1.25374	1.20477	0.923966	1.24312	0.956301	1.18136	1.0519	1.14617	2.38055	1.10176	1.50194	1.02339	1.11059	1.18053	1.03201	1.15637
chr2:10410230-10410303	Mir467a-1	1.23151	1.11734	0.829821	0.991956	0.298867	0.1694	0.679616	0.759065	0.679922	1.23638	1.45132	0.930983	0.509506	0.566067	0.491755	0.290894	1.88366	1.15276	1.53984	1.14182	1.73142	0.97556	1.47825	1.54035	2.56592	2.76923	2.2038	1.15619
chr2:10410225-10410308	Mir467a-2	1.23151	1.11734	0.829821	0.9825	0.296157	0.179268	0.679616	0.759065	0.679922	1.22598	1.43665	0.930983	0.509506	0.57439	0.494461	0.284828	1.89911	1.13802	1.55282	1.14182	1.73142	0.97556	1.47825	1.54035	2.56592	2.76923	2.2038	1.15586
chr4:42768056-42770050	Ccl19	1.07946	1.45519	1.45368	0.995428	1.31465	1.02196	1.13233	1.98842	0.848468	1.61667	0.879854	0.739581	0.803788	0.912692	0.95086	0.959289	1.35954	1.37568	0.929405	1.3079	1.17536	1.85123	0.968172	1.07174	0.807556	1.06698	1.14188	1.15584
chr3:98302995-98314461	Gm10681	1.1233	0.934586	1.18932	1.23713	0.778386	1.17483	0.375973	1.30506	1.03163	1.27417	1.20653	1.29321	1.25312	1.20355	0.922506	1.24292	0.953819	1.18101	1.05073	1.14549	2.3819	1.10192	1.50218	1.02226	1.1082	1.17892	1.03008	1.15566
chr3:98303002-98314395	Hsd3b4	1.12241	0.932686	1.18992	1.23662	0.774258	1.17573	0.372226	1.30686	1.02837	1.27494	1.20693	1.29135	1.25174	1.20046	0.919539	1.24307	0.949301	1.17994	1.04838	1.14413	2.38384	1.10224	1.5036	1.02042	1.10449	1.17613	1.02716	1.15432
chr7:34063384-34065360	Scgb2b19	0.35633	0.503927	0.565989	1.34881	2.5632	1.36571	1.67736	0.459311	1.282	0.573386	1.63393	1.02349	3.36882	1.60852	1.76739	2.30948	1.86438	1.10379	0.307098	0.538325	0.52741	0.415253	1.73638	0.42468	0.274365	1.30791	0.250855	1.154
chr7:54681698-54707509	Mrgpra2a	1.00251	1.23894	1.35044	1.44198	1.49081	1.1737	1.2277	1.37822	1.39377	1.07738	1.31589	1.27538	0.810448	1.33556	1.35615	1.27949	1.20186	1.18527	1.46731	1.00859	0.976563	0.998848	1.20457	1.40452	0.521803	0.504365	0.523688	1.15355
chrX:10898617-10898935	Gm14475	0.831593	0.746901	1.06415	0.87301	0.801727	0.563516	1.05048	0.838684	1.42848	0.932591	0.843239	0.880138	0.743357	0.424089	1.33058	0.927929	1.44829	1.3441	1.44132	1.27584	1.26692	1.53281	1.51341	1.25094	2.55784	0.85031	2.36403	1.15282
chrX:25455339-25478167	Gm5168	1.03054	1.14598	1.13181	0.94177	1.07817	0.963981	1.12539	1.05552	1.29367	0.363925	1.10115	1.31514	1.33284	1.59916	1.82678	0.406347	1.01335	1.04231	1.02751	1.028	1.07396	0.974223	1.06021	1.02105	2.00929	1.06118	2.06686	1.15149
chr2:10417606-10417689	Mir467a-2	0.731212	0.718288	1.62192	1.14234	0.329128	0.692688	1.01942	0.918868	1.43984	0.95666	0.598608	0.769073	0.470314	0.745359	0.774774	0.319386	1.72063	1.24464	1.42355	1.17988	1.25921	1.01458	1.30931	0.891783	2.58105	2.39401	2.73521	1.14821
chr2:10417611-10417684	Mir467a-1	0.731212	0.718288	1.62192	1.14234	0.329128	0.692688	1.01942	0.918868	1.43984	0.956464	0.59874	0.769073	0.470314	0.745359	0.774774	0.319386	1.72063	1.24464	1.42355	1.17988	1.25921	1.01458	1.30931	0.891783	2.58105	2.39401	2.73521	1.14821
chrX:34929041-34933682	Rhox4d	1.07222	1.04898	1.02376	1.27622	1.69195	1.9133	1.30521	1.35056	1.16486	1.35545	0.760505	1.21089	1.91134	1.00111	1.50228	1.33021	1.05091	1.16878	1.17138	0.319518	0.694559	0.0377738	0.744296	0.381096	1.86014	0.730737	1.78802	1.14319
chr8:22083372-22084427	AY761185	1.19212	0.92006	0.954682	0.807305	0.90722	0.941397	0.89649	0.901643	0.832244	0.819117	1.1892	1.02106	1.23426	1.04805	1.12021	1.27293	0.902278	1.52357	1.0197	1.00102	1.57057	1.02976	1.28914	1.06536	1.62148	2.23341	1.51014	1.14165
chr19:61250588-61252212	Gm7102	0.95985	0.934585	0.931428	1.58211	1.47881	1.25302	0.962063	0.966732	1.2776	0.959749	1.08674	1.33258	1.12109	0.995288	1.27199	1.26233	1.13461	1.13891	1.14274	1.68749	0.879616	1.13396	1.08081	1.09621	1.14122	0.731694	1.18902	1.13823
chrX:99998301-100005281	Dmrtc1c1	0.995155	1.01827	1.00644	0.892778	1.01313	0.924414	0.957756	0.966532	1.50629	1.03031	1.0704	1.52668	1.52996	1.471	0.871321	0.906845	0.883019	0.936621	0.963993	0.93144	0.951007	1.51333	0.91348	0.92256	1.83273	1.00166	2.19278	1.13814
chr7:22779605-22780529	Vmn1r107	1.31521	0.911341	0.667296	0.628021	0.383279	0.612975	1.73348	0.968281	1.65489	0.224983	0.327788	2.27896	0.733903	2.32645	0.968434	1.09977	0.289462	1.15368	3.18421	0.38439	1.66778	0.692005	0.977562	2.61306	0.286886	1.7533	0.880061	1.13768
chr5:95734941-95772594	Gm3259	0.802755	1.19387	0.349631	1.04262	1.27793	1.23435	1.44139	1.65799	0.951339	0.810374	0.880125	1.00746	1.13449	0.841243	1.72544	1.96002	0.0376677	1.00508	1.27989	0.737641	1.00864	0.577862	0.915004	0.494325	2.48742	2.48986	1.37205	1.13765
chrX:10901784-10902102	Gm14475	0.960796	0.759523	0.745911	1.09007	0.730077	0.674851	1.14121	0.807736	1.49925	0.66732	0.592922	1.17409	0.943489	0.809522	0.829432	0.664543	1.35078	1.23339	1.337	1.53636	1.14559	1.78679	1.22894	1.10481	2.1345	1.20548	2.55872	1.13752
chr14:3500819-3509260	Gm10413	0.668389	1.68767	2.05079	0.727713	1.18371	0.885379	1.40217	1.02445	0.461833	0.73482	1.16372	1.00307	0.913387	0.657616	0.981394	1.31246	0.625489	0.98587	1.16728	0.911031	1.07711	1.12444	1.18568	1.34019	1.67353	1.88484	1.83806	1.136
chrX:24129375-24152021	Gm4297	0.969277	1.17387	1.17711	0.99702	1.04281	0.982941	1.06375	1.14	1.08842	0.222227	1.17395	1.12979	1.03001	1.52326	2.36401	0.198511	1.026	1.00446	0.994737	1.01544	1.11411	1.02021	1.04803	1.01324	2.04917	1.02576	2.0405	1.13439
chrX:35083503-35087784	Rhox2h	0.992491	2.42171	2.23485	0.963874	0.996896	1.31214	1.01348	1.55696	1.27751	1.07321	0.93706	1.38245	0.994335	0.574152	1.04034	0.919372	1.13555	0.891632	1.32457	0.703251	0.720756	0.984385	0.309074	0.833447	1.69615	0.803944	1.53392	1.13435
chr12:56256090-56290200	Srp54b	1.15011	0.808431	1.22788	1.20804	1.20211	1.22515	1.16434	1.1307	0.911173	1.45562	1.20963	0.833385	0.642694	0.880197	0.96354	1.19206	1.21252	1.214	1.21113	1.2193	1.71116	1.16237	1.19688	1.17114	1.16642	1.06512	1.08242	1.13398
chr14:3740222-3748663	Gm10413	0.696167	1.67448	2.03567	0.71668	1.32269	0.836988	1.34053	1.03113	0.487413	0.745748	1.14732	0.927878	0.974972	0.586795	1.03628	1.34462	0.67595	0.962179	1.1992	0.898315	1.04753	1.17592	1.24654	1.42624	1.58913	1.69385	1.78996	1.13371
chr7:21796550-21797474	Vmn1r119	0.555121	1.69096	3.30451	0.263415	1.05976	1.19223	1.33316	1.29693	1.22865	0.057935	0.0365492	1.14357	0.732775	1.07005	0.100023	0.0493031	0.224455	1.71185	1.59533	1.83282	2.96998	1.67394	1.08004	1.97263	0.174432	1.99402	0.0982515	1.12751
chrX:64092226-64092300	Mir465	1.39561	1.40824	0.74365	1.32115	0.944345	0.70881	1.36874	1.16062	1.16144	1.72668	1.09726	1.2166	1.13147	1.29776	0	0.792472	1.00692	1.072	1.06759	0.762815	0.779896	1.27526	0.938382	0.743085	1.70283	1.09155	2.46829	1.12531
chr6:69276930-69277168	Rprl1	1.7178	0.659736	1.71868	0	0.288382	0.822231	1.63471	0	1.88541	0.964491	1.14037	1.16717	1.00271	2.0178	1.81393	1.21901	1.14523	2.40745	1.57316	1.93169	1.32214	1.08854	1.34224	0	0.312863	0.788573	0.392319	1.12432
chrX:24051433-24077886	Gm5934	1.07543	1.21278	1.11385	1.08383	1.10364	1.08924	1.08147	1.14492	0.557127	0.904254	1.11267	0.557443	0.922432	1.17846	1.46501	0.343552	1.18786	1.12492	1.11351	1.06916	1.14654	1.18062	1.23358	1.14045	2.15511	1.03776	1.95618	1.12192
chr2:10412674-10412757	Mir467a-10	0.739643	1.03671	1.23854	1.12375	0.948607	0.879676	0.853442	0.932913	1.10226	1.85572	0.649191	1.09993	1.14535	1.74641	0.518493	1.06366	0.941927	0.94352	0.779577	0.630189	1.33824	0.91032	1.1031	0.593402	1.80339	1.95285	2.30838	1.11997
chr7:22974395-22975319	Vmn1r143	0.892493	0.680408	0.564621	0.745517	0.468378	0.851336	1.0016	0.933098	2.02269	0.407471	0.383248	2.05618	1.16542	3.21071	0.828747	0.910689	0.140768	0.885996	2.31699	0.451549	1.307	0.977687	0.857946	2.11041	0.848794	2.14892	1.05674	1.11946
chr2:10412681-10412752	Mir467a-1	0.739643	1.03671	1.23854	1.10737	0.972099	0.893681	0.853442	0.932913	1.10226	1.79762	0.631586	1.09993	1.14535	1.77192	0.504607	1.0659	0.918314	0.938692	0.792748	0.630189	1.33824	0.91032	1.1031	0.593402	1.80339	1.95285	2.30838	1.1179
chr14:6956219-6964661	Gm10413	0.689318	1.72481	1.97783	0.626126	1.20425	0.815267	1.30429	1.03123	0.47065	0.73857	1.08765	0.963488	0.907114	0.561724	1.10296	1.33475	0.664742	0.926349	1.18036	0.851741	1.14197	1.22107	1.16229	1.2887	1.63143	1.84881	1.64603	1.11495
chr7:5754330-5755233	Vmn1r187	1.09451	1.03944	0.909056	0.982089	1.05634	0.867496	0.948118	1.10564	0.966195	1.15339	1.03418	1.25376	1.00932	1.49776	1.03244	1.15827	1.26503	1.1373	1.06275	1.13598	1.17737	1.35721	1.10399	1.21032	1.02019	1.25208	1.17728	1.11139
chr7:22296798-22297722	Vmn1r107	1.10681	0.715212	0.591667	0.784483	0.765903	0.719496	1.51097	0.74363	1.6287	0.357267	0.275296	2.08903	0.669427	2.51368	0.975528	1.01794	0.263817	1.35329	2.97441	0.282816	1.72086	0.650313	1.06934	2.80217	0.197903	1.75809	0.361485	1.10739
chr2:10407761-10407844	Mir467a-2	0.750273	0.896627	1.24381	0.544935	0.592281	0.822348	0.515055	0.459744	0.608649	0.280097	1.35857	0.802908	0.704287	0.914142	0.405286	1.08833	1.22101	0.936444	1.36002	0.919449	1.55891	1.05066	1.31255	1.22202	3.01122	2.28519	2.92002	1.10314
chr4:121286608-121294730	Gm12887	0.195727	1.20438	0.15899	1.18609	1.02173	2.05132	2.01249	1.15492	0.137928	0.0898611	1.75233	1.08187	1.03043	1.21749	0.910083	1.01319	0.193491	1.10919	1.18667	1.0295	1.16476	1.9705	0.16869	0.208311	2.18372	2.0384	2.30027	1.10268
chr2:10407766-10407839	Mir467a-1	0.748409	0.892781	1.23703	0.544935	0.592281	0.822348	0.512974	0.45634	0.605768	0.280097	1.35857	0.801863	0.703372	0.914142	0.405286	1.08833	1.22101	0.936444	1.36002	0.917739	1.55858	1.04844	1.30942	1.21837	3.01122	2.28519	2.92002	1.10189
chr1:95815013-95837816	Gm9994	0.975845	0.668403	1.11936	0.643707	1.5931	1.04225	1.51763	0.615333	0.797094	1.60345	1.4655	0.806368	1.41843	0.927227	2.12902	0.788155	1.10371	0.825317	0.319032	1.37256	0.955487	1.5262	0.664431	2.74794	0.824203	0.294472	0.902253	1.09802
chr4:42391949-42393044	Ccl21b	0.828153	1.79527	1.5616	1.42751	1.52774	0.551542	1.64441	2.38024	0.34407	0.678483	0.602335	0.409885	0.731965	0.693216	0.852835	0.387932	1.63079	1.48362	1.86657	0.859885	1.33751	1.1937	0.824858	1.33147	1.20956	0.642323	0.801558	1.09626
chrX:70473644-70476134	F8a	1.38317	1.09619	0.990861	0.932015	0.898335	1.16202	0.792143	0.890149	1.10661	1.1065	0.98783	0.914604	0.897282	0.85459	1.26776	1.00421	1.02757	1.11364	1.08068	1.00253	0.932487	1.00366	1.00075	0.829119	1.89959	1.06895	2.23505	1.09179
chr11:99659386-99665764	Krtap4-13	1.05125	1.17339	0.654394	0.769282	1.05602	0.835182	1.14463	1.10159	1.12432	0.806133	1.61618	1.20882	0.746093	1.43813	1.71417	1.2821	0.303486	1.05832	0.684983	1.10883	1.09912	1.07525	1.12494	1.16402	1.44828	1.68609	0.999893	1.09166
chr4:42391949-42393080	Ccl21c	0.813805	1.76429	1.55086	1.40844	1.50573	0.545463	1.62384	2.34815	0.341196	0.676919	0.593871	0.409379	0.723378	0.682617	0.84772	0.375595	1.63064	1.45699	1.84738	0.853356	1.33415	1.19047	0.8221	1.33876	1.18801	0.648061	0.807201	1.08624
chr7:5753949-5757047	Vmn1r63	1.09701	1.22229	0.965492	0.913969	1.12281	1.08921	1.09166	1.05655	0.975572	1.04063	1.08217	1.12933	0.955365	1.32249	0.997271	0.974533	1.18498	1.09263	1.14743	1.15598	1.19949	1.14989	1.00565	1.1408	0.98176	1.2312	0.962841	1.08478
chr7:5626923-5627826	Vmn1r186	0.931024	1.38633	1.19082	1.09815	1.09048	0.805352	1.07142	1.20852	0.983143	1.37085	1.19559	1.17063	1.14734	1.29198	1.01925	0.946298	1.00798	1.00625	1.15954	0.95246	0.967637	1.16309	1.07558	0.824385	1.16915	0.95279	1.09791	1.08459
[truncated: 308 more rows]
