# Supplementary material for: Divergence patterns of genic copy number variation in natural populations of the house mouse (Mus musculus domesticus) reveal three conserved genes with major population-specific expansions
Source: Genome Res. 2015 Aug;25(8):1114–24. doi: 10.1101/gr.187187.114 (PMC4509996; doi:10.1101/gr.187187.114)
Supplement: Supplemental Material [file supp_gr.187187.114_Supp_Table_S6.xlsx]

## Sheet: Sheet1
Table S6. Frequency of deletion alleles
Coordinates (mm9)	Gene Symbol	# of animals heterozygous for deletion	# of animals with complete deletion	# of deletion alleles	deletion allele frequency
chr14:90296030-90299254	Gm5088	1	26	53	0.981481
chr7:23222324-23223248	Vmn1r101	2	24	50	0.925926
chr7:21094965-21095883	Vmn1r103	3	23	49	0.907407
chr7:23546715-23547609	Vmn1r157	3	23	49	0.907407
chr7:22880538-22882940	Vmn1r132	5	22	49	0.907407
chr7:21027018-21027942	Vmn1r101	2	23	48	0.888889
chr7:21059308-21060274	Gm10665	4	22	48	0.888889
chr4:112477220-112959578	Skint6	6	21	48	0.888889
chr7:22399110-22400004	Vmn1r139	6	21	48	0.888889
chr7:22881885-22882779	Vmn1r139	6	21	48	0.888889
chr7:21119185-21120109	Vmn1r104	5	21	47	0.87037
chr7:23248128-23249094	Gm10665	5	21	47	0.87037
chr7:23283779-23284697	Vmn1r151	5	21	47	0.87037
chr7:23318982-23319906	Gm5726	5	21	47	0.87037
chr7:22397763-22400165	Vmn1r132	7	20	47	0.87037
chr7:21130182-21131106	Gm5726	4	21	46	0.851852
chr7:23307985-23308909	Vmn1r104	4	21	46	0.851852
chr7:21357946-21358840	Vmn1r157	6	20	46	0.851852
chr7:21556203-21557097	Vmn1r112	8	19	46	0.851852
chr7:23113812-23114736	Gm4133	5	20	45	0.833333
chr7:23840558-23841482	Vmn1r135	5	20	45	0.833333
chr7:20959841-20960759	Gm5728	7	19	45	0.833333
chr7:20918490-20919414	Gm4133	7	18	43	0.796296
chr7:23155140-23156058	Gm5728	7	18	43	0.796296
chrX:64082376-64082455	Mir465b-1	0	21	23	0.793103
chrX:64088938-64089017	Mir465b-1	0	21	23	0.793103
chr8:22703846-22704937	Gm7849	4	19	42	0.777778
chr8:22703958-22704937	Gm7861	4	19	42	0.777778
chr7:22617369-22618293	Vmn1r135	6	18	42	0.777778
chr7:23137281-23139574	Vmn1r-ps79	10	16	42	0.777778
chr8:22565898-22566989	Gm7849	3	19	41	0.759259
chr8:22566010-22566989	Gm7861	3	19	41	0.759259
chr7:20941974-20944267	Vmn1r-ps79	9	16	41	0.759259
chr7:22628362-22629286	Gm5725	9	16	41	0.759259
chr7:22145386-22146310	Vmn1r129	6	17	40	0.740741
chr8:22675857-22676816	LOC100862126	1	19	39	0.722222
chr8:22675857-22676822	Gm14850	1	19	39	0.722222
chr7:22134391-22135315	Vmn1r128	7	16	39	0.722222
chr7:23498616-23504729	Gm4567	9	15	39	0.722222
chr8:22455224-22456066	Gm15299	9	15	39	0.722222
chr7:21309847-21315960	Gm4567	11	14	39	0.722222
chr7:22694452-22706308	Gm10662	11	14	39	0.722222
chr7:22694452-22706310	Gm5891	11	14	39	0.722222
chr7:23851551-23852475	Gm5725	11	14	39	0.722222
chr7:23917641-23929497	Gm10662	11	14	39	0.722222
chr7:23917641-23929499	Gm5891	11	14	39	0.722222
chr7:22580829-22581747	Gm4177	8	15	38	0.703704
chr7:21160669-21161590	Gm4141	10	14	38	0.703704
chr7:23349441-23350362	Gm4141	10	14	38	0.703704
chr7:21287647-21288568	Gm8693	12	13	38	0.703704
chr2:175247800-175261277	Gm14308	16	11	38	0.703704
chrX:145522857-145739546	Gm15085	2	18	20	0.689655
chr4:111754074-111840681	Skint4	9	14	37	0.685185
chr4:112058573-112106590	Skint9	9	14	37	0.685185
chr7:111463544-111473352	LOC622070	9	14	37	0.685185
chr2:10418123-10418210	Mir669p-1	11	13	37	0.685185
chr7:23197249-23199687	Vmn1r148	11	13	37	0.685185
chr14:45119792-45126016	BC061237	15	11	37	0.685185
chr2:175150243-175163712	Gm14308	17	10	37	0.685185
chr2:175244891-175261278	Gm14430	17	10	37	0.685185
chr2:175639523-175652992	Gm14308	17	10	37	0.685185
chr2:175737073-175753460	0610010B08Rik	17	10	37	0.685185
chr2:175737074-175750551	Gm14308	17	10	37	0.685185
chr4:111904849-111973073	Skint3	8	14	36	0.666667
chr4:111905025-111970850	Skint3	8	14	36	0.666667
chr7:21509530-21515643	Gm4567	14	11	36	0.666667
chr14:44769271-44790902	1700047E10Rik	18	9	36	0.666667
chr2:175147334-175163713	Gm14430	18	9	36	0.666667
chr2:175197962-175210780	Gm14431	18	9	36	0.666667
chr2:175639522-175655901	0610010B08Rik	18	9	36	0.666667
chr2:175917414-175930232	Gm14431	18	9	36	0.666667
chr2:175964487-175977956	Gm14308	18	9	36	0.666667
chr2:176266769-176280240	Gm14308	18	9	36	0.666667
chrX:144756676-144789273	Gm15093	2	17	19	0.655172
chrX:145532494-145572695	Gm15085	2	17	19	0.655172
chrX:145540098-145572695	Gm15093	2	17	19	0.655172
chr7:23768747-23769692	Gm4175	9	13	35	0.648148
chr7:23804024-23804942	Gm4177	9	13	35	0.648148
chr7:20752808-20753726	Vmn1r142	11	12	35	0.648148
chr7:22103962-22104880	Vmn1r127	11	12	35	0.648148
chr7:22545549-22546494	Gm4175	11	12	35	0.648148
chr7:24057806-24060262	Gm6902	13	11	35	0.648148
chr12:105185141-105195107	Serpina1e	17	9	35	0.648148
chr2:175690012-175702830	Gm14431	19	8	35	0.648148
chr2:176266768-176283149	Gm14430	19	8	35	0.648148
chr11:71055931-71098734	Nlrp1c	4	15	34	0.62963
chr4:121087339-121095704	Gm12886	8	13	34	0.62963
chr7:21254266-21255190	Vmn1r107	14	10	34	0.62963
chr7:23476415-23477336	Gm8693	14	10	34	0.62963
chr6:130099123-130110766	Klra14	16	9	34	0.62963
chr5:95294540-95307276	AU018829	20	7	34	0.62963
chr5:95294551-95306423	Gm16367	20	7	34	0.62963
chrX:145706919-145739546	Gm15093	2	16	18	0.62069
chrX:145889719-145922327	Gm15093	2	16	18	0.62069
chr7:111448410-111464009	Trim12a	5	14	33	0.611111
chr7:22948136-22949054	Vmn1r142	11	11	33	0.611111
chr7:23443036-23443960	Vmn1r107	13	10	33	0.611111
chr5:95611642-95624361	AU018829	21	6	33	0.611111
chr8:22639501-22640484	Gm15308	2	15	32	0.592593
chr7:23385002-23404469	Gm4541	14	9	32	0.592593
chr5:94731543-94735821	A430089I19Rik	16	8	32	0.592593
chr7:22230791-22250942	Gm4541	16	8	32	0.592593
chr7:22713597-22733746	Gm4541	16	8	32	0.592593
chr4:143125856-143132374	Gm13040	20	6	32	0.592593
chr5:95611653-95623508	Gm16367	22	5	32	0.592593
chrX:144749072-144955989	Gm15085	2	15	17	0.586207
chrX:144923491-144955989	Gm15114	2	15	17	0.586207
chrX:145098146-145138392	Gm15127	2	15	17	0.586207
chrX:145882159-145922327	Gm15085	2	15	17	0.586207
chr10:117726685-117732094	Iltifb	1	15	31	0.574074
chr5:96161110-96165192	BC061212	11	10	31	0.574074
chr7:31707390-31709200	Hamp2	11	10	31	0.574074
chr7:21837885-21838803	Vmn1r120	13	9	31	0.574074
chr7:22085544-22086486	Gm4175	13	9	31	0.574074
chr8:22693498-22694339	Gm6696	15	8	31	0.574074
chr6:129606363-129610614	Klrc2	19	6	31	0.574074
chr6:129606388-129610574	Klrc2	19	6	31	0.574074
chr4:143141602-143148139	Gm13040	21	5	31	0.574074
chr2:176131421-176141950	Gm14306	23	4	31	0.574074
chr6:60229036-60353701	A530053G22Rik	10	10	30	0.555556
chr7:21003290-21004214	Vmn1r100	12	9	30	0.555556
chr7:22330188-22331109	Gm4172	12	9	30	0.555556
chr7:24035780-24036701	Gm4172	12	9	30	0.555556
chr7:21196232-21215690	Gm4541	14	8	30	0.555556
chr7:22085520-22086486	Vmn1r126	14	8	30	0.555556
chr7:23198601-23199525	Vmn1r100	14	8	30	0.555556
chr4:143101214-143107736	Gm13040	22	4	30	0.555556
chr4:143101245-143107734	Gm13043	22	4	30	0.555556
chr17:24054424-24056408	Dcpp3	24	3	30	0.555556
chr2:175295525-175306054	Gm14306	24	3	30	0.555556
chrX:145317118-145358682	Luzp4	2	14	16	0.551724
chr14:44579490-44579934	Ang6	7	11	29	0.537037
chr3:88187748-88188386	Bglap	7	11	29	0.537037
chr7:24002350-24003274	Vmn1r107	15	7	29	0.537037
chr5:95417718-95455565	Gm6367	17	6	29	0.537037
chr5:95380098-95384376	A430089I19Rik	19	5	29	0.537037
chr4:113150495-113672108	Skint5	21	4	29	0.537037
chr6:85657166-85657852	Gm4477	23	3	29	0.537037
chr6:85742110-85754051	Alms1-ps2	23	3	29	0.537037
chr2:176181276-176194747	Gm14308	25	2	29	0.537037
chr7:10339984-10355920	Vmn2r46	25	2	29	0.537037
chr7:8317008-8332944	Vmn2r46	25	2	29	0.537037
chr2:10410742-10410829	Mir669p-1	14	7	28	0.518519
chr7:22812995-22813916	Gm4172	14	7	28	0.518519
chr8:22194718-22195695	Defa23	16	6	28	0.518519
chr8:22194718-22195696	Defa-rs7	16	6	28	0.518519
chr4:143436399-143443540	Gm13103	18	5	28	0.518519
chr7:21509530-21511986	Gm6902	18	5	28	0.518519
chr14:26847658-26862145	Plac9	26	1	28	0.518519
chr2:175295560-175308823	Gm14436	26	1	28	0.518519
chr2:176131456-176144719	Gm14436	26	1	28	0.518519
chr2:90061723-90064628	Gm13769	26	1	28	0.518519
chr11:73600441-73601377	Olfr390	7	10	27	0.5
chr8:22776268-22776440	Defa4	11	8	27	0.5
chr4:121286608-121294730	Gm12887	13	7	27	0.5
chr1:95757920-95773071	Gal3st2	17	5	27	0.5
chr4:42625654-42626785	Ccl21c	17	5	27	0.5
chr4:42625690-42626785	Ccl21b	17	5	27	0.5
chr2:10405304-10405387	Mir467a-10	19	4	27	0.5
chr2:10424899-10424982	Mir467a-10	19	4	27	0.5
chr2:10424906-10424977	Mir467a-1	19	4	27	0.5
chr7:22918794-22919760	Gm10666	19	4	27	0.5
chr7:54719176-54744952	Mrgpra2b	21	3	27	0.5
chr2:176493061-176506522	Gm14305	25	1	27	0.5
chr2:176493061-176507478	OTTMUSG00000016609	25	1	27	0.5
chr3:98356465-98367932	Gm10681	25	1	27	0.5
chr3:98356473-98367866	Hsd3b4	25	1	27	0.5
chr3:98356473-98367961	Hsd3b4	25	1	27	0.5
chr12:56225514-56243069	1700047I17Rik2	27	0	27	0.5
chr12:56300578-56318133	1700047I17Rik2	27	0	27	0.5
chr14:26707419-26722457	Gm10393	27	0	27	0.5
chr14:26707888-26722379	Plac9	27	0	27	0.5
chr14:26742783-26746736	D14Ertd449e	27	0	27	0.5
chr14:26742783-26747158	D14Ertd449e	27	0	27	0.5
chr14:26743482-26746647	Gm9746	27	0	27	0.5
chr14:26743482-26747142	Gm9746	27	0	27	0.5
chr14:26743483-26746725	Gm10395	27	0	27	0.5
chr14:26743483-26747158	Gm10395	27	0	27	0.5
chr14:26762025-26775856	Gm2104	27	0	27	0.5
chr14:26762029-26775851	Cphx	27	0	27	0.5
chr14:26802490-26809318	Duxbl	27	0	27	0.5
chr14:26802490-26809652	Gm10391	27	0	27	0.5
chr14:26847189-26862223	Gm10393	27	0	27	0.5
chr14:26882536-26886489	D14Ertd449e	27	0	27	0.5
chr14:26882536-26886911	D14Ertd449e	27	0	27	0.5
chr14:26883235-26886400	Gm9746	27	0	27	0.5
chr14:26883235-26886895	Gm9746	27	0	27	0.5
chr14:26883236-26886478	Gm10395	27	0	27	0.5
chr14:26883236-26886911	Gm10395	27	0	27	0.5
chr14:26901778-26915613	Gm2104	27	0	27	0.5
chr14:26901782-26915608	Cphx	27	0	27	0.5
chr14:26942094-26949271	Gm10391	27	0	27	0.5
chr14:26986803-27001837	Gm10393	27	0	27	0.5
chr14:26987272-27001759	Plac9	27	0	27	0.5
chr14:27022152-27026105	D14Ertd449e	27	0	27	0.5
chr14:27022152-27026527	D14Ertd449e	27	0	27	0.5
chr14:27022851-27026016	Gm9746	27	0	27	0.5
chr14:27022851-27026511	Gm9746	27	0	27	0.5
chr14:27022852-27026094	Gm10395	27	0	27	0.5
chr14:27022852-27026527	Gm10395	27	0	27	0.5
chr14:27041389-27055226	Gm2104	27	0	27	0.5
chr14:27041393-27055221	Cphx	27	0	27	0.5
chr14:27081743-27088586	Duxbl	27	0	27	0.5
chr14:27081743-27088920	Gm10391	27	0	27	0.5
chr17:54100939-54129956	Sult1c1	27	0	27	0.5
chr2:90162378-90165283	Gm13769	27	0	27	0.5
chr4:143689782-143700004	Gm13102	27	0	27	0.5
chr7:54681698-54707509	Mrgpra2a	27	0	27	0.5
chr7:5626205-5628199	Vmn1r62	27	0	27	0.5
chr7:5626923-5627826	Vmn1r186	27	0	27	0.5
chr7:5753949-5757047	Vmn1r63	27	0	27	0.5
chr7:5754330-5755233	Vmn1r187	27	0	27	0.5
chr8:127536896-127558092	Tsnax	27	0	27	0.5
chr8:22056168-22061750	Gm6040	27	0	27	0.5
chr8:97814493-97830485	Cngb1	27	0	27	0.5
chr7:21796550-21797474	Vmn1r119	10	8	26	0.481481
chr9:39201377-39202322	Olfr951	14	6	26	0.481481
chr7:22974395-22975319	Vmn1r143	16	5	26	0.481481
chr5:94955308-94967392	Gm3139	18	4	26	0.481481
chr7:149360436-149361910	Krtap5-2	18	4	26	0.481481
chr7:20723471-20724437	Gm10666	18	4	26	0.481481
chr12:22990696-23046943	2410018L13Rik	20	3	26	0.481481
chr2:10407761-10407844	Mir467a-2	20	3	26	0.481481
chr2:10407766-10407839	Mir467a-1	20	3	26	0.481481
chr4:41985509-41986640	Ccl21c	20	3	26	0.481481
chr4:41985545-41986640	Ccl21b	20	3	26	0.481481
chr14:46703701-46704632	Gm1821	22	2	26	0.481481
chr3:98302995-98314461	Gm10681	24	1	26	0.481481
chr3:98303002-98314395	Hsd3b4	24	1	26	0.481481
chr3:98303002-98314490	Hsd3b4	24	1	26	0.481481
chr12:56256090-56290200	Srp54b	26	0	26	0.481481
chr17:31298340-31301998	Tff1	26	0	26	0.481481
chr8:96848210-96848281	Mir138-2	26	0	26	0.481481
chr9:21092907-21095653	Cdkn2d	26	0	26	0.481481
chr8:22619727-22620709	Defa20	5	10	25	0.462963
chr17:36315721-36318309	Gm6623	11	7	25	0.462963
chr7:23574877-23575801	Vmn1r158	11	7	25	0.462963
chr7:34063384-34065360	Scgb2b19	11	7	25	0.462963
chr8:22301955-22302928	Defa22	11	7	25	0.462963
chr7:22296798-22297722	Vmn1r107	13	6	25	0.462963
chr7:22779605-22780529	Vmn1r107	13	6	25	0.462963
chr2:10417606-10417689	Mir467a-2	19	3	25	0.462963
chr2:10417611-10417684	Mir467a-1	19	3	25	0.462963
chr5:95734941-95772594	Gm3259	19	3	25	0.462963
chr7:21596239-21597205	Vmn1r114	19	3	25	0.462963
chr10:129411660-129412605	Olfr247	23	1	25	0.462963
chr10:129420535-129421480	Olfr247	23	1	25	0.462963
chr11:99659386-99665764	Krtap4-13	23	1	25	0.462963
chr11:99659499-99671206	Gm11554	23	1	25	0.462963
chr12:56256326-56365681	Srp54a	25	0	25	0.462963
chr19:61250588-61252212	Gm7102	25	0	25	0.462963
chr4:143649028-143659221	Pramel4	25	0	25	0.462963
chr7:10402130-10426674	Vmn2r47	25	0	25	0.462963
chr7:8246254-8270798	Vmn2r47	25	0	25	0.462963
chr6:69276930-69277168	Rprl1	12	6	24	0.444444
chr9:39233709-39234654	Olfr952	12	6	24	0.444444
chr2:10410225-10410308	Mir467a-2	16	4	24	0.444444
chr2:10410230-10410303	Mir467a-1	16	4	24	0.444444
chr7:22057197-22058121	Vmn1r125	16	4	24	0.444444
chr6:85710624-85712474	Cml3	18	3	24	0.444444
chr14:6451733-6458384	Gm3317	22	1	24	0.444444
chr11:58315099-58316056	Olfr331	24	0	24	0.444444
chr14:51575815-51584424	Pnp2	24	0	24	0.444444
chr4:42248503-42250497	Ccl19	24	0	24	0.444444
chr4:42768056-42770050	Ccl19	24	0	24	0.444444
chr16:36277233-36285457	Stfa1	11	6	23	0.425926
chr4:42391949-42393044	Ccl21b	17	3	23	0.425926
chr4:42391949-42393080	Ccl21c	17	3	23	0.425926
chr1:95815013-95837816	Gm9994	19	2	23	0.425926
chr7:20779058-20779982	Vmn1r143	19	2	23	0.425926
chr14:3500819-3509260	Gm10413	21	1	23	0.425926
chr14:3740222-3748663	Gm10413	21	1	23	0.425926
chr14:6956219-6964661	Gm10413	21	1	23	0.425926
chr10:81167569-81184721	Zfp433	23	0	23	0.425926
chr10:81274930-81289235	Gm10778	23	0	23	0.425926
chr10:81326678-81343831	Zfp433	23	0	23	0.425926
chr10:81364655-81393225	Zfp781	23	0	23	0.425926
chr17:8118864-8127762	Tagap	23	0	23	0.425926
chr7:7738861-7772578	Vmn2r35	23	0	23	0.425926
chr13:33415945-33427235	Serpinb9f	6	8	22	0.407407
chr4:63017195-63020545	Orm3	10	6	22	0.407407
chr7:20790032-20790956	Gm6164	10	6	22	0.407407
chr15:77338700-77347749	Apol11a	14	4	22	0.407407
chr7:113329256-113333613	Gm18853	14	4	22	0.407407
chr7:113329265-113333613	Gm17757	14	4	22	0.407407
chr2:10415136-10415219	Mir467a-2	16	3	22	0.407407
chr2:10415141-10415214	Mir467a-1	16	3	22	0.407407
chr5:96204888-96233249	E330014E10Rik	16	3	22	0.407407
chr2:10408273-10408368	Mir669a-2	18	2	22	0.407407
chr2:10408275-10408372	Mir669a-1	18	2	22	0.407407
chr2:10408279-10408366	Mir669a-10	18	2	22	0.407407
chr17:6635807-6646630	Tmem181c-ps	20	1	22	0.407407
chr17:6648832-6655064	Dynlt1f	20	1	22	0.407407
chr17:6648841-6654956	Dynlt1c	20	1	22	0.407407
chr17:6806387-6812617	Dynlt1f	20	1	22	0.407407
chr17:6806495-6812609	Dynlt1c	20	1	22	0.407407
chr17:6814820-6825643	Tmem181c-ps	20	1	22	0.407407
chr2:176583304-176593409	Gm14295	20	1	22	0.407407
chr11:114882041-114888326	Gm11710	22	0	22	0.407407
chr12:105001796-105011843	Serpina1d	22	0	22	0.407407
chr13:12706332-12742662	Gpr137b-ps	22	0	22	0.407407
chr14:5266666-5273317	Gm3317	22	0	22	0.407407
chr14:6804350-6811001	Gm3317	22	0	22	0.407407
chr17:6600795-6607794	Dynlt1f	22	0	22	0.407407
chr17:6600903-6607786	Dynlt1c	22	0	22	0.407407
chr2:10412674-10412757	Mir467a-10	22	0	22	0.407407
chr2:10412681-10412752	Mir467a-1	22	0	22	0.407407
chr4:73518122-73522170	Gm13871	22	0	22	0.407407
chr4:73518123-73522170	Gm11757	22	0	22	0.407407
chr4:73518127-73522170	Gm11758	22	0	22	0.407407
chr7:10092186-10116991	Vmn2r47	22	0	22	0.407407
chr7:7829363-7855173	Vmn2r36	22	0	22	0.407407
chr7:8557271-8583081	Vmn2r36	22	0	22	0.407407
chr8:22083372-22084427	AY761185	22	0	22	0.407407
chr9:38480088-38481066	Olfr918	7	7	21	0.388889
chr14:44500562-44501033	Ear10	9	6	21	0.388889
chr7:23627706-23628624	Vmn1r159	9	6	21	0.388889
chr7:21657274-21658198	Vmn1r116	13	4	21	0.388889
chr7:21696445-21697366	Gm4498	13	4	21	0.388889
chr7:113043632-113102481	Gm4070	15	3	21	0.388889
chr7:113043632-113102484	Gvin1	15	3	21	0.388889
chr7:113072848-113077205	Gm18853	15	3	21	0.388889
chr7:113072857-113077205	Gm17757	15	3	21	0.388889
chr7:113300049-113358851	Gm4070	15	3	21	0.388889
chr7:113300049-113358854	Gvin1	15	3	21	0.388889
chr2:10415648-10415743	Mir669a-2	17	2	21	0.388889
chr2:10415650-10415747	Mir669a-1	17	2	21	0.388889
chr2:10415654-10415741	Mir669a-10	17	2	21	0.388889
chr11:99664983-99665760	Gm11554	21	0	21	0.388889
chr17:6600795-6610127	Dynlt1f	21	0	21	0.388889
chr17:6851323-6860656	Dynlt1f	21	0	21	0.388889
chr17:6853656-6860656	Dynlt1f	21	0	21	0.388889
chr17:6853664-6860548	Dynlt1c	21	0	21	0.388889
chr4:42231042-42232176	Gm1987	21	0	21	0.388889
chr4:42231044-42232176	Ccl21a	21	0	21	0.388889
chr4:42786391-42787523	Ccl21a	21	0	21	0.388889
chr4:42786391-42787525	Gm1987	21	0	21	0.388889
chr4:73532968-73537016	Gm13871	21	0	21	0.388889
chr4:73532969-73537016	Gm11757	21	0	21	0.388889
chr4:73532973-73537016	Gm11758	21	0	21	0.388889
chrX:132029126-132039133	AV320801	1	10	11	0.37931
chrX:34784986-34789685	Rhox2a	2	9	11	0.37931
chrX:35563617-35563697	Mir3110	0	9	11	0.37931
chr7:3859881-3867103	Lilra6	4	8	20	0.37037
chr7:66933880-66933970	Snord116	4	8	20	0.37037
chr13:22817552-22818491	Vmn1r207-ps	6	7	20	0.37037
chr7:22044712-22045636	Vmn1r124	6	7	20	0.37037
chr14:44740831-44749036	4930503E14Rik	12	4	20	0.37037
chr3:22150291-22150529	Rprl2	12	4	20	0.37037
chr7:22985359-22986283	Gm6164	12	4	20	0.37037
chr1:175451441-175466088	BC094916	14	3	20	0.37037
chr5:95885824-95914608	D5Ertd577e	14	3	20	0.37037
chr5:96221657-96233254	Gm3286	14	3	20	0.37037
chr4:60885338-60889318	Mup13	18	1	20	0.37037
chr5:138293374-138299277	Pilrb1	18	1	20	0.37037
chr11:99664861-99665760	Gm11569	20	0	20	0.37037
chr7:113465909-113468042	Gm8989	20	0	20	0.37037
chr4:63005599-63009196	Orm1	9	5	19	0.351852
chr7:23656242-23657166	Vmn1r160	9	5	19	0.351852
chr12:104689107-104695433	Ifi27l2b	11	4	19	0.351852
chr15:77307476-77321499	Apol10a	11	4	19	0.351852
chr3:88187416-88188386	Bglap	11	4	19	0.351852
chr14:59895749-59916359	Phf11	13	3	19	0.351852
chr7:21668216-21669140	Vmn1r117	13	3	19	0.351852
chr8:22776268-22777205	Gm15315	13	3	19	0.351852
chr7:23013582-23014503	Gm4498	15	2	19	0.351852
chr7:9246438-9270107	Vmn2r40	15	2	19	0.351852
chr7:9965778-9989425	Vmn2r41	15	2	19	0.351852
chr8:22341282-22342125	Gm15293	17	1	19	0.351852
chr10:81205565-81233887	Zfp781	19	0	19	0.351852
chr11:114892799-114899083	Gm11710	19	0	19	0.351852
chr4:42349016-42354418	Ccl27b	19	0	19	0.351852
chr5:145790468-145793633	Gm4871	19	0	19	0.351852
chr7:113010294-113011841	Gm15645	19	0	19	0.351852
chr7:113219245-113221378	Gm8989	19	0	19	0.351852
chr8:22165223-22166196	Defa21	6	6	18	0.333333
chr5:94806364-94813359	AA792892	8	5	18	0.333333
chr6:67515227-67515693	4930515G16Rik	8	5	18	0.333333
chr7:110665924-110666896	Olfr611	8	5	18	0.333333
chr11:82815659-82834224	Slfn8	10	4	18	0.333333
chr11:82815659-82834312	Slfn8	10	4	18	0.333333
chr2:85914860-85915875	Olfr1036	10	4	18	0.333333
chr7:20707004-20707928	Gm16442	10	4	18	0.333333
chr7:54844319-54856742	Mrgpra3	10	4	18	0.333333
chr7:23936779-23963780	Gm4541	14	2	18	0.333333
chr7:9638310-9655801	Vmn2r45	14	2	18	0.333333
chr4:60732253-60736153	Mup12	16	1	18	0.333333
chr5:138307056-138312986	Pilrb2	16	1	18	0.333333
chr2:175100624-175109351	Gm14288	18	0	18	0.333333
chr2:175791443-175800170	Gm14288	18	0	18	0.333333
chr4:42024167-42029569	Ccl27b	18	0	18	0.333333
chr4:42027472-42029569	Ccl27b	18	0	18	0.333333
chr4:42349016-42351113	Ccl27b	18	0	18	0.333333
chr4:42452732-42476567	4933409K07Rik	18	0	18	0.333333
chr7:15974199-15983892	Obox2	18	0	18	0.333333
chr2:150043834-150070610	Zfp937	3	7	17	0.314815
chr2:89457324-89458402	Olfr1248	7	5	17	0.314815
chr6:129963050-129976972	Klra6	7	5	17	0.314815
chr6:129963051-129976978	Klra19	7	5	17	0.314815
chr7:22902340-22903264	Gm16442	7	5	17	0.314815
chr17:35576099-35580718	H2-Q7	9	4	17	0.314815
chr17:35576111-35580715	H2-Q9	9	4	17	0.314815
chr5:95902559-95914124	Gm3286	11	3	17	0.314815
chr9:19584726-19588508	Olfr58	11	3	17	0.314815
chr17:18222020-18273607	Vmn2r91	13	2	17	0.314815
chr17:35479277-35482667	H2-Q2	13	2	17	0.314815
chr4:60961068-60965030	Mup14	13	2	17	0.314815
chr7:21882587-21883532	Vmn1r121	13	2	17	0.314815
chr13:61872939-61888642	BC052688	15	1	17	0.314815
chr14:7010438-7020406	Gm10408	15	1	17	0.314815
chr4:41774206-41775337	Ccl21c	15	1	17	0.314815
chr4:41774242-41775337	Ccl21b	15	1	17	0.314815
chr7:20818256-20819177	Gm4498	15	1	17	0.314815
chr7:3788411-3796653	Pira2	15	1	17	0.314815
chr7:9927006-9944061	Vmn2r42	15	1	17	0.314815
chr14:51153088-51154024	Olfr743	17	0	17	0.314815
chr2:175017505-175163713	0610010B08Rik	17	0	17	0.314815
chr2:175100625-175112306	Gm14440	17	0	17	0.314815
chr2:175788488-175800169	Gm14440	17	0	17	0.314815
chr4:41902018-41925853	4933409K07Rik	17	0	17	0.314815
chr4:42028838-42039327	Gm2002	17	0	17	0.314815
chr4:42029564-42039326	Gm13305	17	0	17	0.314815
chr4:42339258-42349747	Gm2002	17	0	17	0.314815
chr4:42339259-42349021	Gm13305	17	0	17	0.314815
chr4:42664135-42669537	Ccl27b	17	0	17	0.314815
chr4:42667440-42669537	Ccl27b	17	0	17	0.314815
chr4:42668806-42679295	Gm2002	17	0	17	0.314815
chr4:42669532-42679294	Gm13305	17	0	17	0.314815
chr6:66586816-66587746	Vmn1r34	17	0	17	0.314815
chr7:113219244-113222662	Gm8979	17	0	17	0.314815
chr7:3835813-3849694	Gm14548	17	0	17	0.314815
chr7:54441135-54444725	Mrgpra6	17	0	17	0.314815
chrX:8262456-8267970	Ssxb8	0	9	9	0.310345
chr7:9744079-9759858	Vmn2r44	2	7	16	0.296296
chr13:13275048-13284107	Prl2c5	6	5	16	0.296296
chr9:88490162-88494081	9430037G07Rik	8	4	16	0.296296
chr8:22224120-22224964	Defa25	10	3	16	0.296296
chr4:88406677-88407488	Gm13283	12	2	16	0.296296
chr8:22427087-22428056	Defa3	12	2	16	0.296296
chr14:3555026-3564989	Gm10408	14	1	16	0.296296
chr14:3794429-3804392	Gm10408	14	1	16	0.296296
chr13:21903652-21903964	Hist1h4n	16	0	16	0.296296
chr13:50357183-50358238	2310081J21Rik	16	0	16	0.296296
chr16:44820840-44839263	Cd200r4	16	0	16	0.296296
chr2:10405816-10405911	Mir669a-2	16	0	16	0.296296
chr2:10405818-10405915	Mir669a-1	16	0	16	0.296296
chr2:10405822-10405909	Mir669a-10	16	0	16	0.296296
chr3:92019756-92026413	Sprr2a1	16	0	16	0.296296
chr4:60591132-60595027	Mup10	16	0	16	0.296296
chr4:61252962-61256864	Mup17	16	0	16	0.296296
chr5:147349223-147352003	Gm3409	16	0	16	0.296296
chr5:23763345-23763430	Mir684-1	16	0	16	0.296296
chr6:85758044-85759871	Gm11128	16	0	16	0.296296
chr7:111477984-111485131	Trim34b	16	0	16	0.296296
chr7:3789723-3849722	Pira7	16	0	16	0.296296
chr7:3789728-3849694	Pira4	16	0	16	0.296296
chr7:3789755-3849695	Pira11	16	0	16	0.296296
chr13:12883082-12892325	Prl2c4	5	5	15	0.277778
chr13:12883087-12892346	Prl2c3	5	5	15	0.277778
chr7:17234378-17242827	Ceacam-ps1	5	5	15	0.277778
chr17:35531043-35532575	H2-Q5	7	4	15	0.277778
chr5:94064210-94100489	C87414	7	4	15	0.277778
chr5:95939760-95951421	Gm3286	7	4	15	0.277778
chr12:56331464-56364007	Srp54c	13	1	15	0.277778
chr9:88851757-88857254	Bcl2a1a	13	1	15	0.277778
chr10:21786114-21787885	4930444G20Rik	15	0	15	0.277778
chr14:5731119-5754402	Gm3500	15	0	15	0.277778
chr14:6653871-6677154	Gm3500	15	0	15	0.277778
chr17:34644879-34654297	Btnl6	15	0	15	0.277778
chr3:92054568-92061226	Sprr2a1	15	0	15	0.277778
chr4:42028814-42029569	Ccl27b	15	0	15	0.277778
chr4:42668782-42669537	Ccl27b	15	0	15	0.277778
chr4:61096818-61100736	Mup15	15	0	15	0.277778
chr4:88403747-88404296	Gm13286	15	0	15	0.277778
chr5:147325698-147328478	Gm3402	15	0	15	0.277778
chr7:111392970-111410750	Trim34a	15	0	15	0.277778
chrX:10892214-10892723	Gm14482	2	6	8	0.275862
chr7:20686506-20687430	Vmn1r91	4	5	14	0.259259
chr12:104680376-104681890	Ifi27l2a	6	4	14	0.259259
chr8:22389440-22390140	Gm15292	6	4	14	0.259259
chr11:49283555-49284683	Olfr1386	8	3	14	0.259259
chr17:35561791-35565306	H2-Q8	8	3	14	0.259259
chr17:35561821-35565306	H2-Q6	8	3	14	0.259259
chr5:105644717-105668552	Gbp10	8	3	14	0.259259
chr7:115355096-115356041	Olfr487	8	3	14	0.259259
chr7:21572303-21573227	Vmn1r113	8	3	14	0.259259
chr7:21629116-21630004	Vmn1r115	10	2	14	0.259259
chr8:22728639-22729444	Defa26	10	2	14	0.259259
chr1:175787350-175810318	Mndal	12	1	14	0.259259
chr14:42668556-42674084	1700091H14Rik	12	1	14	0.259259
chr4:60672252-60675243	Mup2	12	1	14	0.259259
chr11:99670391-99671210	Krtap4-13	14	0	14	0.259259
chr13:21903614-21904019	Hist1h4m	14	0	14	0.259259
chr17:36252815-36258389	H2-T10	14	0	14	0.259259
chr17:36252820-36258380	H2-T10	14	0	14	0.259259
chr4:42349016-42349771	Ccl27b	14	0	14	0.259259
chr4:60149719-60152729	Mup2	14	0	14	0.259259
chr7:3788416-3867086	Pira1	14	0	14	0.259259
chr9:78078475-78090490	Gsta1	14	0	14	0.259259
chrX:64085691-64085772	Mir465c-1	0	7	7	0.241379
chrX:10892283-10892601	Gm14475	2	5	7	0.241379
chrX:131702162-131712171	AV320801	2	5	7	0.241379
chrX:146219021-146419525	Gm15127	2	5	7	0.241379
chrX:146376197-146419525	Gm15091	2	5	7	0.241379
chrX:34847000-34851785	Rhox4b	2	5	7	0.241379
chr7:5495798-5496701	Vmn1r60	1	6	13	0.240741
chr13:13088390-13097597	Prl2c2	3	5	13	0.240741
chr15:63722819-63743852	Gsdmc4	5	4	13	0.240741
chr17:13414053-13420524	Smok2a	5	4	13	0.240741
chr8:22204716-22205680	Gm10104	5	4	13	0.240741
chr13:50738596-50741207	Gm904	7	3	13	0.240741
chr7:114249425-114250373	Gm10081	7	3	13	0.240741
chr7:115315311-115316256	Olfr486	7	3	13	0.240741
chr8:22234649-22235729	Gm14851	7	3	13	0.240741
chr14:3740251-3906698	Gm5795	11	1	13	0.240741
chr16:36359467-36367656	BC100530	11	1	13	0.240741
chr4:60671338-60675267	Mup11	11	1	13	0.240741
chr4:88400771-88401320	Gm13271	11	1	13	0.240741
chr6:123442525-123483424	Vmn2r21	11	1	13	0.240741
chr12:106429254-106433609	Tcl1b3	13	0	13	0.240741
chr12:18521315-18542060	5730507C01Rik	13	0	13	0.240741
chr14:5923635-5933553	Gm3383	13	0	13	0.240741
chr2:10413186-10413281	Mir669a-2	13	0	13	0.240741
chr2:10413188-10413285	Mir669a-1	13	0	13	0.240741
chr2:10413192-10413279	Mir669a-10	13	0	13	0.240741
chr2:175010665-175032425	Gm14391	13	0	13	0.240741
chr3:93473254-93480205	Tdpoz1	13	0	13	0.240741
chr3:93978333-93982115	Gm10696	13	0	13	0.240741
chr4:60148804-60152729	Mup2	13	0	13	0.240741
chr4:60510884-60514832	Mup1	13	0	13	0.240741
chr4:73547809-73551857	Gm13871	13	0	13	0.240741
chr4:73547810-73551857	Gm11757	13	0	13	0.240741
chr4:73547814-73551857	Gm11758	13	0	13	0.240741
chr5:138478451-138491861	Smok3b	13	0	13	0.240741
chr2:111289298-111290216	Olfr1287	2	5	12	0.222222
chr1:31321691-31324906	Gm4850	4	4	12	0.222222
chr17:13397907-13399077	Gm10512	4	4	12	0.222222
chr17:13427736-13429320	Smok2b	4	4	12	0.222222
chr7:11032137-11033136	Vmn1r67	6	3	12	0.222222
chr11:48779318-48792900	9930111J21Rik2	8	2	12	0.222222
chr12:24728066-24782134	9030624G23Rik	8	2	12	0.222222
chr2:122292318-122293533	Bambi-ps1	8	2	12	0.222222
chr2:122310676-122353776	Gm14085	8	2	12	0.222222
chr8:22465566-22466699	Defa-rs1	8	2	12	0.222222
chr14:3500848-3668655	Gm5795	10	1	12	0.222222
chr2:87708149-87709082	Olfr1152	10	1	12	0.222222
chr5:149965703-149967768	Gm8615	10	1	12	0.222222
chr6:130241178-130256450	Klra13-ps	10	1	12	0.222222
chr6:130273304-130287644	Klra3	10	1	12	0.222222
chr8:107391323-107397982	Ces2d-ps	10	1	12	0.222222
chr14:6727191-6737109	Gm3383	12	0	12	0.222222
chr17:36245974-36248621	C920025E04Rik	12	0	12	0.222222
chr3:15695146-15748487	LOC100038947	12	0	12	0.222222
chr4:60079340-60152730	Mup15	12	0	12	0.222222
chr5:147367688-147370491	Gm3415	12	0	12	0.222222
chr5:147367711-147370491	Gm3402	12	0	12	0.222222
chr6:41408928-41413785	Prss1	12	0	12	0.222222
chrX:8610611-8611459	Fthl17	0	6	6	0.206897
chrX:144427535-144467717	Gm15080	2	4	6	0.206897
chrX:144435111-144467717	Gm15093	2	4	6	0.206897
chr19:12133298-12134240	Olfr1424	3	4	11	0.203704
chr7:111681472-111683875	Trim30e-ps1	3	4	11	0.203704
chr11:50840505-50841447	Olfr54	5	3	11	0.203704
chr17:36217133-36221194	H2-Bl	5	3	11	0.203704
chr17:6438149-6450142	Tmem181b-ps	5	3	11	0.203704
chr4:122366501-122382378	9530002B09Rik	5	3	11	0.203704
chr7:149459668-149460268	Gm4559	5	3	11	0.203704
chr7:21918229-21919147	Vmn1r122	5	3	11	0.203704
chr8:22331251-22332228	Defa23	5	3	11	0.203704
chr8:22331251-22332229	Defa-rs7	5	3	11	0.203704
chr14:3849203-3889441	1700110I01Rik	9	1	11	0.203704
chr17:36281962-36299319	2410017I17Rik	9	1	11	0.203704
chr6:130241178-130258379	Klra23	9	1	11	0.203704
chr6:41392212-41396096	Gm10334	9	1	11	0.203704
chr7:33226559-33227863	Scgb1b29	9	1	11	0.203704
chr1:175603810-175628523	Pydc3	11	0	11	0.203704
chr14:44534733-44540745	Ang3	11	0	11	0.203704
chr17:23080150-23095781	Vmn2r113	11	0	11	0.203704
chr17:7099577-7099686	Mir692-1	11	0	11	0.203704
chr3:113052095-113061617	Amy2a5	11	0	11	0.203704
chr4:60511805-60514832	Mup1	11	0	11	0.203704
chr5:11594955-11599480	Gm6460	11	0	11	0.203704
chr7:9147158-9163091	Vmn2r39	11	0	11	0.203704
chr8:12395518-12399555	Sox1	11	0	11	0.203704
chr16:59215510-59216437	Olfr199	4	3	10	0.185185
chr6:85710624-85715738	Cml3	4	3	10	0.185185
chr11:48851161-48864744	9930111J21Rik2	6	2	10	0.185185
chr7:7503677-7519497	Vmn2r33	8	1	10	0.185185
chr7:9866726-9882971	Vmn2r43	8	1	10	0.185185
chr14:3518337-3539580	Gm10409	10	0	10	0.185185
chr14:3757740-3778983	Gm10409	10	0	10	0.185185
chr14:6973740-6991301	Gm3020	10	0	10	0.185185
chr14:6973740-6994984	Gm10409	10	0	10	0.185185
chr17:13289525-13291338	Gm11166	10	0	10	0.185185
chr17:38088995-38089967	Olfr761	10	0	10	0.185185
chr2:175018480-175032418	Gm6710	10	0	10	0.185185
chr3:113082754-113094367	Amy2a2	10	0	10	0.185185
chr3:113084762-113094229	Amy2a5	10	0	10	0.185185
chr3:113115366-113126970	Amy2a2	10	0	10	0.185185
chr3:113117374-113126832	Amy2a5	10	0	10	0.185185
chr3:113147966-113159576	Amy2a2	10	0	10	0.185185
chr3:113149974-113159438	Amy2a5	10	0	10	0.185185
chr4:113835988-113917633	Skint11	10	0	10	0.185185
chr4:60231492-60235471	Mup8	10	0	10	0.185185
chr4:73562631-73566664	Gm11756	10	0	10	0.185185
chr5:147313952-147328478	Gm3415	10	0	10	0.185185
chr7:11591093-11595896	Zscan4c	10	0	10	0.185185
chr7:9080031-9103001	Vmn2r38	10	0	10	0.185185
chrX:64079129-64079210	Mir465c-1	0	5	5	0.172414
chrX:71986265-71987527	Gm6890	0	5	5	0.172414
chrX:146219046-146261237	Gm15097	2	3	5	0.172414
chrX:27889230-27912081	Gm10147	2	3	5	0.172414
chrX:27889230-27912113	Gm10230	2	3	5	0.172414
chrX:27889230-27912141	Gm10486	2	3	5	0.172414
chrX:27889234-27912110	Gm10058	2	3	5	0.172414
chrX:27889247-27912141	Gm10096	2	3	5	0.172414
chrX:27889249-27912110	Gm10488	2	3	5	0.172414
chr11:48759651-48792883	9930111J21Rik1	5	2	9	0.166667
chr15:74938590-74942379	Ly6c2	5	2	9	0.166667
chr17:39673086-39677792	Gm4345	5	2	9	0.166667
chr7:21947203-21948127	Vmn1r123	5	2	9	0.166667
chr14:3609810-3650049	1700110I01Rik	7	1	9	0.166667
chr19:12284057-12284996	Olfr1431	7	1	9	0.166667
chr2:10422959-10423054	Mir669a-2	7	1	9	0.166667
chr2:10422961-10423058	Mir669a-1	7	1	9	0.166667
chr2:10422965-10423052	Mir669a-10	7	1	9	0.166667
chr11:48798830-48805748	Tgtp1	9	0	9	0.166667
chr11:48798830-48805756	Tgtp2	9	0	9	0.166667
chr11:87570365-87570429	Mir142	9	0	9	0.166667
chr14:3518337-3535897	Gm3020	9	0	9	0.166667
chr16:16819805-16820289	Rpl31-ps12	9	0	9	0.166667
chr17:34400171-34406363	H2-Ab1	9	0	9	0.166667
chr17:36264553-36266370	Gm7030	9	0	9	0.166667
chr17:36301388-36305482	Gm8909	9	0	9	0.166667
chr17:6270474-6305783	Tmem181a	9	0	9	0.166667
chr2:175019779-175032425	Gm14391	9	0	9	0.166667
chr4:60079340-60083347	Mup7	9	0	9	0.166667
chr4:61176624-61180518	Mup16	9	0	9	0.166667
chr4:88428034-88429496	Ifnz	9	0	9	0.166667
chr7:11486088-11490399	Zscan4b	9	0	9	0.166667
chr7:8954256-8972357	Vmn2r37	9	0	9	0.166667
chr9:78104935-78116973	Gm3776	9	0	9	0.166667
chr11:116613480-116619197	BC018473	4	2	8	0.148148
chr13:67490264-67500703	Zfp429	4	2	8	0.148148
chr17:39173639-39177172	Esp24	4	2	8	0.148148
chr17:39210635-39213982	Gm20581	4	2	8	0.148148
chr19:12979720-12981475	Gm5512	4	2	8	0.148148
chr8:22274328-22275277	Gm15284	4	2	8	0.148148
chr8:22766238-22767208	Defa17	4	2	8	0.148148
chr10:78417951-78418884	Olfr8	6	1	8	0.148148
chr2:80468861-80468947	Mir684-1	6	1	8	0.148148
chr6:41365305-41369592	Gm5409	6	1	8	0.148148
chr9:19517272-19518202	Olfr857	6	1	8	0.148148
chr11:49365250-49366186	Olfr1381	8	0	8	0.148148
chr11:73299388-73300324	Olfr381	8	0	8	0.148148
chr12:88985074-88989933	Gm16381	8	0	8	0.148148
chr13:22864267-22865194	Vmn1r208	8	0	8	0.148148
chr13:33576658-33587869	Serpinb9g	8	0	8	0.148148
chr13:67964262-67964860	BC048507	8	0	8	0.148148
chr14:3757740-3775300	Gm3020	8	0	8	0.148148
chr14:59863277-59879053	Gm6904	8	0	8	0.148148
chr2:10420531-10420626	Mir669a-2	8	0	8	0.148148
chr2:10420533-10420630	Mir669a-1	8	0	8	0.148148
chr2:10420537-10420624	Mir669a-10	8	0	8	0.148148
chr2:175868369-175881015	Gm14391	8	0	8	0.148148
chr2:175868376-175882314	Gm6710	8	0	8	0.148148
chr2:89470096-89471053	Olfr1249	8	0	8	0.148148
chr4:41836783-41842582	Gm13298	8	0	8	0.148148
chr5:138462503-138475887	Smok3a	8	0	8	0.148148
chr5:138462656-138475893	Smok3a	8	0	8	0.148148
chr6:123335279-123368079	Vmn2r20	8	0	8	0.148148
chr6:130219211-130231946	Klra10	8	0	8	0.148148
chr7:10034292-10041283	2810047C21Rik1	8	0	8	0.148148
chr7:110975036-110976442	Beta-s	8	0	8	0.148148
chr7:7184037-7200039	Vmn2r29	8	0	8	0.148148
chrX:34884374-34888286	Rhox3c	0	4	4	0.137931
chrX:34971918-34976789	Rhox4e	0	4	4	0.137931
chrX:34985927-34990666	Rhox2f	0	4	4	0.137931
chrX:24475577-24498454	Gm10147	1	3	4	0.137931
chrX:24475577-24498486	Gm10230	1	3	4	0.137931
chrX:24475577-24498514	Gm10486	1	3	4	0.137931
chrX:24475581-24498483	Gm10058	1	3	4	0.137931
chrX:24475594-24498514	Gm10096	1	3	4	0.137931
chrX:29130521-29153403	Gm10096	1	3	4	0.137931
chrX:29130521-29153420	Gm10486	1	3	4	0.137931
chrX:29130549-29153420	Gm10230	1	3	4	0.137931
chrX:29130552-29153401	Gm10488	1	3	4	0.137931
chrX:29130552-29153416	Gm10058	1	3	4	0.137931
chrX:29130581-29153420	Gm10147	1	3	4	0.137931
chrX:24975421-24997578	Gm1993	2	2	4	0.137931
chrX:58144540-58146605	Sox3	2	2	4	0.137931
chrX:5044021-5046383	Mycs	1	2	4	0.137931
chr5:121326150-121337607	Oas1g	1	3	7	0.12963
chr7:55643895-55645018	Mrgprb8	1	3	7	0.12963
chr17:39777901-39782612	Gm9041	3	2	7	0.12963
chr7:93812173-93813184	Olfr293	3	2	7	0.12963
chr2:10422448-10422531	Mir467a-2	5	1	7	0.12963
chr2:10422453-10422526	Mir467a-1	5	1	7	0.12963
chr7:51251248-51255245	Klk1b11	5	1	7	0.12963
chr9:37923382-37924312	Olfr889	5	1	7	0.12963
chr1:175892699-175912975	Ifi202b	7	0	7	0.12963
chr11:114903444-114909609	Cd300lh	7	0	7	0.12963
chr13:50774538-50775593	2310081J21Rik	7	0	7	0.12963
chr15:77355296-77363745	Apol7c	7	0	7	0.12963
chr15:77449397-77457828	Gm8221	7	0	7	0.12963
chr17:13253976-13275092	Tcp10b	7	0	7	0.12963
chr17:34118436-34122303	AA388235	7	0	7	0.12963
chr4:145207048-145214297	Gm13212	7	0	7	0.12963
chr4:42535970-42541769	Gm13298	7	0	7	0.12963
chr4:60432031-60434824	Mup9	7	0	7	0.12963
chr4:61711268-61715151	Mup20	7	0	7	0.12963
chr6:41323757-41327612	Prss3	7	0	7	0.12963
chr7:110686774-110687746	Olfr612	7	0	7	0.12963
chr7:110880441-110881392	Olfr628	7	0	7	0.12963
chr7:11891726-11896031	Zscan4e	7	0	7	0.12963
chr17:6429259-6435443	Dynlt1b	0	3	6	0.111111
chr6:121956815-122035985	Mug2	2	2	6	0.111111
chr15:77529318-77549718	Apol7b	4	1	6	0.111111
chr3:88181657-88182621	Bglap2	4	1	6	0.111111
chr6:123974775-124012053	Vmn2r26	4	1	6	0.111111
chr6:89985926-89986835	Vmn1r48	4	1	6	0.111111
chr7:114988300-114989245	Olfr470	4	1	6	0.111111
chr7:24538929-24539871	Vmn1r174	4	1	6	0.111111
chr11:68715067-68718036	Rpl26	6	0	6	0.111111
chr11:68715090-68718036	Gm15772	6	0	6	0.111111
chr14:3049284-3076838	Gm2897	6	0	6	0.111111
chr14:3049307-3077025	LOC100861615	6	0	6	0.111111
chr17:17258346-17283842	Zfp97	6	0	6	0.111111
chr19:12964138-12965065	Olfr1446	6	0	6	0.111111
chr2:176637496-176649142	Gm14405	6	0	6	0.111111
chr2:85847934-85848867	Olfr1032	6	0	6	0.111111
chr4:143157369-143163701	BC080695	6	0	6	0.111111
chr4:88434535-88435084	Gm13285	6	0	6	0.111111
chr4:88437453-88438002	Gm13285	6	0	6	0.111111
chr5:11340407-11346273	Speer1-ps1	6	0	6	0.111111
chr7:11379589-11384414	Zscan4a	6	0	6	0.111111
chr7:115238110-115239082	Olfr482	6	0	6	0.111111
chr7:7336695-7352338	Vmn2r31	6	0	6	0.111111
chr7:7416679-7432684	Vmn2r32	6	0	6	0.111111
chr8:22437072-22438054	Defa5	6	0	6	0.111111
chrX:146029143-146071164	Gm10439	0	3	3	0.103448
chrX:34789913-34798973	Rhox3a	0	3	3	0.103448
chrX:34868165-34872882	Rhox2c	0	3	3	0.103448
chrX:34894843-34899631	Rhox4c	0	3	3	0.103448
chrX:34929041-34933682	Rhox4d	0	3	3	0.103448
chrX:34961481-34965404	Rhox3e	0	3	3	0.103448
chrX:3546313-3547091	Gm14354	0	3	3	0.103448
chrX:99986534-99993728	Gm5166	0	3	3	0.103448
chrX:27228255-27251095	Gm10147	1	2	3	0.103448
chrX:27228255-27251127	Gm10230	1	2	3	0.103448
chrX:27228255-27251155	Gm10486	1	2	3	0.103448
chrX:27228259-27251124	Gm10058	1	2	3	0.103448
chrX:27228272-27251155	Gm10096	1	2	3	0.103448
chrX:27228274-27251124	Gm10488	1	2	3	0.103448
chrX:28236042-28258881	Gm10147	1	2	3	0.103448
chrX:28236042-28258913	Gm10230	1	2	3	0.103448
chrX:28236042-28258941	Gm10486	1	2	3	0.103448
chrX:28236046-28258910	Gm10058	1	2	3	0.103448
chrX:28236059-28258941	Gm10096	1	2	3	0.103448
chrX:28236061-28258910	Gm10488	1	2	3	0.103448
chrX:32607378-32630294	Gm10096	1	2	3	0.103448
chrX:32607378-32630311	Gm10486	1	2	3	0.103448
chrX:32607406-32630311	Gm10230	1	2	3	0.103448
chrX:32607409-32630292	Gm10488	1	2	3	0.103448
chrX:32607409-32630307	Gm10058	1	2	3	0.103448
chrX:32607438-32630311	Gm10147	1	2	3	0.103448
chrX:34805369-34810130	Rhox4a	1	2	3	0.103448
chrX:151523061-151524333	Magea1	2	1	3	0.103448
chr15:101473450-101477811	Gm5478	1	2	5	0.0925926
chr14:3262412-3305842	1700110I01Rik	3	1	5	0.0925926
chr2:111219158-111220094	Olfr1284	3	1	5	0.0925926
chr2:111260188-111261106	Olfr1286	3	1	5	0.0925926
chr4:146034924-146036119	Gm13034	3	1	5	0.0925926
chr6:123559775-123600653	Vmn2r22	3	1	5	0.0925926
chr7:10512972-10538934	Vmn2r48	3	1	5	0.0925926
chr9:3038668-3038743	Mir101c	3	1	5	0.0925926
chr10:21864109-21869076	E030030I06Rik	5	0	5	0.0925926
chr10:51200484-51206025	Gp49a	5	0	5	0.0925926
chr12:105133135-105143160	Serpina1c	5	0	5	0.0925926
chr13:13449887-13485891	Gpr137b	5	0	5	0.0925926
chr14:50654065-50655175	Olfr725	5	0	5	0.0925926
chr15:79913288-79913336	Snord43	5	0	5	0.0925926
chr17:30759385-30763850	1700097N02Rik	5	0	5	0.0925926
chr17:34419695-34424716	H2-Aa	5	0	5	0.0925926
chr17:37247986-37248925	Olfr92	5	0	5	0.0925926
chr17:7159313-7165505	Tagap1	5	0	5	0.0925926
chr2:10425417-10425504	Mir669a-10	5	0	5	0.0925926
chr2:151127774-151141739	4930442J19Rik	5	0	5	0.0925926
chr2:177677315-177691994	Gm14326	5	0	5	0.0925926
chr2:177757988-177767215	Etohi1	5	0	5	0.0925926
chr4:143204905-143208498	Gm13083	5	0	5	0.0925926
chr4:88443140-88444108	Gm13279	5	0	5	0.0925926
chr4:88443300-88443849	Gm13285	5	0	5	0.0925926
chr5:147302938-147305708	Gm6370	5	0	5	0.0925926
chr5:147313974-147316759	4930449I24Rik	5	0	5	0.0925926
chr6:128902370-128925047	Gm15987	5	0	5	0.0925926
chr6:41342354-41347255	Gm5771	5	0	5	0.0925926
chr7:54590244-54609610	Mrgpra1	5	0	5	0.0925926
chr8:74581558-74582574	Olfr372	0	2	4	0.0740741
chr10:128623539-128624475	Olfr773	2	1	4	0.0740741
chr10:129402791-129403754	Olfr819	2	1	4	0.0740741
chr12:11889001-11889705	Tubb2a-ps2	2	1	4	0.0740741
chr12:89414032-89420338	Gm10436	2	1	4	0.0740741
chr13:50848761-50860617	4930518P08Rik	2	1	4	0.0740741
chr15:100183630-100192250	Mettl7a2	2	1	4	0.0740741
chr7:108727373-108729675	Art2b	2	1	4	0.0740741
chr9:37950721-37951666	Olfr890	2	1	4	0.0740741
chr9:38935751-38952655	Olfr27	2	1	4	0.0740741
chr1:65973095-65974878	Crygf	4	0	4	0.0740741
chr10:51210780-51216417	Lilrb4	4	0	4	0.0740741
chr13:101053069-101087643	Naip7	4	0	4	0.0740741
chr14:43688720-43694109	Gm10377	4	0	4	0.0740741
chr14:4534030-4622491	Gm3264	4	0	4	0.0740741
chr15:63678863-63682497	Gsdmcl1	4	0	4	0.0740741
chr15:63689279-63710113	Gsdmc3	4	0	4	0.0740741
chr17:17201066-17226595	Zfp960	4	0	4	0.0740741
chr17:24017842-24019820	Dcpp1	4	0	4	0.0740741
chr17:38267193-38268135	Olfr132	4	0	4	0.0740741
chr17:38285534-38286473	Olfr133	4	0	4	0.0740741
chr17:40087464-40092232	Esp38	4	0	4	0.0740741
chr18:37571327-37574168	Pcdhb10	4	0	4	0.0740741
chr2:10425413-10425510	Mir669a-1	4	0	4	0.0740741
chr2:150912521-150918086	Gm14151	4	0	4	0.0740741
chr2:150923980-150929545	Gm14151	4	0	4	0.0740741
chr2:177757988-177770564	Etohi1	4	0	4	0.0740741
chr2:85487519-85488476	Olfr1002	4	0	4	0.0740741
chr2:86253265-86254207	Olfr1061	4	0	4	0.0740741
chr4:118426199-118427141	Olfr1338	4	0	4	0.0740741
chr4:118481459-118482467	Olfr1335	4	0	4	0.0740741
chr4:147195885-147196311	Rps19-ps3	4	0	4	0.0740741
chr4:41812375-41813375	LOC100041579	4	0	4	0.0740741
chr4:41812375-41813410	Gm13308	4	0	4	0.0740741
chr4:61439361-61443258	Mup19	4	0	4	0.0740741
chr4:88433880-88435342	Gm13277	4	0	4	0.0740741
chr4:88437293-88438261	Gm13279	4	0	4	0.0740741
chr5:11749832-11769308	1700003C15Rik	4	0	4	0.0740741
chr5:147293518-147296278	Gm6408	4	0	4	0.0740741
chr6:128837631-128846866	Clec2i	4	0	4	0.0740741
chr6:129716664-129725867	Gm156	4	0	4	0.0740741
chr6:133714016-133717421	Gm5886	4	0	4	0.0740741
chr7:111618528-111656363	Trim30d	4	0	4	0.0740741
chr7:11983263-11987667	Zscan4f	4	0	4	0.0740741
chr8:107370967-107378382	Ces2c	4	0	4	0.0740741
chr9:109225399-109242173	Fbxw28	4	0	4	0.0740741
chr9:109225751-109242173	Fbxw28	4	0	4	0.0740741
chr9:39801396-39802332	Olfr978	4	0	4	0.0740741
chrX:10895381-10895890	Gm14482	0	2	2	0.0689655
chrX:24129375-24152021	Gm4297	0	2	2	0.0689655
chrX:24330287-24352290	Gm5935	0	2	2	0.0689655
chrX:25455339-25478167	Gm5168	0	2	2	0.0689655
chrX:27574931-27597811	Gm10147	0	2	2	0.0689655
chrX:27574931-27597843	Gm10230	0	2	2	0.0689655
chrX:27574931-27597871	Gm10486	0	2	2	0.0689655
chrX:27574935-27597840	Gm10058	0	2	2	0.0689655
chrX:27574948-27597871	Gm10096	0	2	2	0.0689655
chrX:29924763-29947648	Gm10147	0	2	2	0.0689655
chrX:29924763-29947680	Gm10230	0	2	2	0.0689655
chrX:29924763-29947708	Gm10486	0	2	2	0.0689655
chrX:29924767-29947677	Gm10058	0	2	2	0.0689655
chrX:29924780-29947708	Gm10096	0	2	2	0.0689655
chrX:31428919-31429697	LOC100862314	0	2	2	0.0689655
chrX:34784986-34831309	Rhox2e	0	2	2	0.0689655
chrX:34794872-34798793	Rhox3e	0	2	2	0.0689655
chrX:34907916-34912222	Rhox2d	0	2	2	0.0689655
chrX:67198455-67199155	1700020N15Rik	0	2	2	0.0689655
chrX:10876446-10876764	Gm14475	1	1	2	0.0689655
chrX:50911098-50912311	Cxx1c	1	1	2	0.0689655
chrX:131907822-131917932	Gm5128	2	0	2	0.0689655
chrX:131968373-131978536	Gm5128	2	0	2	0.0689655
chrX:144615266-144659253	Gm15107	2	0	2	0.0689655
chrX:70319683-70327846	Xlr4a	2	0	2	0.0689655
chr10:128569886-128570822	Olfr770	1	1	3	0.0555556
chr10:128597084-128598038	Olfr771	1	1	3	0.0555556
chr13:50696340-50696449	Mir683-1	1	1	3	0.0555556
chr2:177563695-177575023	Gm14325	1	1	3	0.0555556
chr3:88625931-88636409	1500004A13Rik	1	1	3	0.0555556
chr6:56906506-56907400	Vmn1r4	1	1	3	0.0555556
chr9:38951686-38952603	Olfr242	1	1	3	0.0555556
chr9:88583442-88614636	Gm2382	1	1	3	0.0555556
chr9:88618125-88626688	Bcl2a1d	1	1	3	0.0555556
chr1:175522087-175529405	Pydc4	3	0	3	0.0555556
chr1:176260648-176263008	1810030J14Rik	3	0	3	0.0555556
chr10:22081699-22093945	Raet1d	3	0	3	0.0555556
chr10:33486229-33501921	Gm4794	3	0	3	0.0555556
chr11:58654617-58655544	Olfr311	3	0	3	0.0555556
chr13:101051075-101086571	Naip6	3	0	3	0.0555556
chr14:3188283-3196683	Gm5795	3	0	3	0.0555556
chr14:3224445-3234357	D830030K20Rik	3	0	3	0.0555556
chr14:43371374-43376742	Gm10377	3	0	3	0.0555556
chr14:44396430-44397304	Ear1	3	0	3	0.0555556
chr14:45336841-45344662	Gm8267	3	0	3	0.0555556
chr15:63655900-63676731	Gsdmc2	3	0	3	0.0555556
chr15:79722837-79738859	Apobec3	3	0	3	0.0555556
chr16:3592397-3593339	Olfr161	3	0	3	0.0555556
chr16:36184297-36188196	Gm5483	3	0	3	0.0555556
chr17:19910326-19949500	Vmn2r103	3	0	3	0.0555556
chr17:34111603-34115736	H2-K2	3	0	3	0.0555556
chr17:34132956-34137278	H2-K1	3	0	3	0.0555556
chr17:34161927-34162037	Mir219-1	3	0	3	0.0555556
chr17:35400038-35404442	H2-D1	3	0	3	0.0555556
chr17:35400067-35403675	H2-L	3	0	3	0.0555556
chr17:35457502-35462044	H2-Q1	3	0	3	0.0555556
chr17:37932390-37933320	Olfr123	3	0	3	0.0555556
chr19:8234657-8293329	Slc22a29	3	0	3	0.0555556
chr19:8410112-8479595	Slc22a30	3	0	3	0.0555556
chr2:10420019-10420102	Mir467a-2	3	0	3	0.0555556
chr2:10420024-10420097	Mir467a-1	3	0	3	0.0555556
chr2:168056121-168057803	Mocs3	3	0	3	0.0555556
chr2:174887049-174893264	Gm14393	3	0	3	0.0555556
chr3:14363116-14374239	Gm6300	3	0	3	0.0555556
chr3:88172538-88173642	Bglap-rs1	3	0	3	0.0555556
chr4:136957468-136965706	Gm13011	3	0	3	0.0555556
chr4:143309357-143319061	Gm13078	3	0	3	0.0555556
chr4:143538484-143540919	Gm13109	3	0	3	0.0555556
chr4:146064712-146094024	Gm13051	3	0	3	0.0555556
chr4:88419897-88420446	Gm13285	3	0	3	0.0555556
chr4:88422825-88423374	Gm13285	3	0	3	0.0555556
chr5:105242186-105289087	Zfp951	3	0	3	0.0555556
chr7:110935725-110940344	Olfr67	3	0	3	0.0555556
chr7:110987637-110989035	Hbb-bh2	3	0	3	0.0555556
chr7:111503911-111507160	Trim30b	3	0	3	0.0555556
chr7:114240980-114241928	Olfr17	3	0	3	0.0555556
chr7:115773507-115774440	Olfr508	3	0	3	0.0555556
chr7:11746991-11751497	Zscan4d	3	0	3	0.0555556
chr7:18761842-18767211	Igfl3	3	0	3	0.0555556
chr7:19303438-19312597	Psg22	3	0	3	0.0555556
chr7:19371650-19374763	Sycp1-ps1	3	0	3	0.0555556
chr7:19374473-19383859	Psg19	3	0	3	0.0555556
chr7:26846513-26881215	Cyp2b13	3	0	3	0.0555556
chr7:55276340-55282967	Mrgprx1	3	0	3	0.0555556
chr7:55453582-55454548	Mrgprb4	3	0	3	0.0555556
chr7:7165706-7231000	Vmn2r29	3	0	3	0.0555556
chr7:7624539-7642109	Vmn2r34	3	0	3	0.0555556
chr9:37868906-37869836	Olfr885	3	0	3	0.0555556
chr9:39807790-39808835	Olfr979	3	0	3	0.0555556
chr10:129348393-129349332	Olfr816	0	1	2	0.037037
chr10:129382159-129383116	Olfr818	0	1	2	0.037037
chr10:129454418-129455357	Olfr820	0	1	2	0.037037
chr10:129470683-129471616	Olfr821	0	1	2	0.037037
chr10:129511467-129512406	Olfr822	0	1	2	0.037037
chr11:58394338-58395379	Olfr325	0	1	2	0.037037
chr15:100165359-100170600	Mettl7a3	0	1	2	0.037037
chr19:13889133-13890078	Olfr1499	0	1	2	0.037037
chr6:41901626-41906097	Sval1	0	1	2	0.037037
chr6:41918138-41923089	Sval3	0	1	2	0.037037
chr9:88734001-88743028	Trim43c	0	1	2	0.037037
chr1:175850533-175872591	Ifi203	2	0	2	0.037037
chr1:175850533-175872623	Ifi203	2	0	2	0.037037
chr1:21275326-21288393	Gm4956	2	0	2	0.037037
chr10:128426969-128427908	Olfr9	2	0	2	0.037037
chr10:129338831-129339782	Olfr815	2	0	2	0.037037
chr10:78074413-78080819	Olfr1357	2	0	2	0.037037
chr11:68735336-68740583	Odf4	2	0	2	0.037037
chr11:73238538-73241979	Olfr378	2	0	2	0.037037
chr11:99676289-99676980	Gm11564	2	0	2	0.037037
chr12:105091504-105101829	Serpina1a	2	0	2	0.037037
chr14:10716608-10719382	Gm3833	2	0	2	0.037037
chr14:4974180-4978876	Gm3264	2	0	2	0.037037
chr14:52383566-52393265	Ang4	2	0	2	0.037037
chr14:56590264-56592832	Cma2	2	0	2	0.037037
chr14:7838628-7859963	Gm10406	2	0	2	0.037037
chr14:8244986-8255199	4933406F09Rik	2	0	2	0.037037
chr15:79746236-79763076	Cbx7	2	0	2	0.037037
chr15:79908210-79913836	Rpl3	2	0	2	0.037037
chr15:79908932-79909009	Snord83b	2	0	2	0.037037
chr16:36404031-36408449	Stfa2	2	0	2	0.037037
chr16:48842664-48844574	Retnla	2	0	2	0.037037
chr16:59085377-59086307	Olfr191	2	0	2	0.037037
chr16:59097891-59098816	Olfr192	2	0	2	0.037037
chr17:13547437-13570089	Tcp10c	2	0	2	0.037037
chr17:15115827-15128541	9030025P20Rik	2	0	2	0.037037
chr17:15132746-15147148	Gm3417	2	0	2	0.037037
chr17:15146803-15159413	Gm3435	2	0	2	0.037037
chr17:15164114-15178523	Gm3417	2	0	2	0.037037
chr17:15164117-15178523	Tcte3	2	0	2	0.037037
chr17:18718690-18735121	Vmn2r96	2	0	2	0.037037
chr17:33313360-33314308	Olfr55	2	0	2	0.037037
chr17:33336006-33336954	Olfr239	2	0	2	0.037037
chr17:34624350-34634374	Btnl5	2	0	2	0.037037
chr17:35402723-35462354	LOC547349	2	0	2	0.037037
chr17:35516561-35521619	H2-Q4	2	0	2	0.037037
chr17:36166921-36169646	H2-T23	2	0	2	0.037037
chr17:39543303-39547937	Gm20579	2	0	2	0.037037
chr17:7183208-7202542	Rnaset2b	2	0	2	0.037037
chr17:8231374-8294093	Gm1604b	2	0	2	0.037037
chr18:60535682-60552283	Iigp1	2	0	2	0.037037
chr19:13575035-13577782	Olfr1477	2	0	2	0.037037
chr2:10402874-10402947	Mir467b	2	0	2	0.037037
chr2:111911802-111912738	Olfr1313	2	0	2	0.037037
chr2:177631867-177662555	Gm14327	2	0	2	0.037037
chr2:177801582-177813130	Zfp931	2	0	2	0.037037
chr2:36543523-36544453	Olfr346	2	0	2	0.037037
chr2:85193151-85194081	Olfr988	2	0	2	0.037037
chr2:87736333-87737290	Olfr1153	2	0	2	0.037037
chr2:88025035-88025974	Olfr1168	2	0	2	0.037037
chr2:88064236-88065187	Olfr1170	2	0	2	0.037037
chr2:90240796-90241831	Olfr1274-ps	2	0	2	0.037037
chr3:64341482-64363740	Vmn2r6	2	0	2	0.037037
chr4:145427121-145427895	Gm13238	2	0	2	0.037037
chr4:145658643-145683119	Gm13247	2	0	2	0.037037
chr4:147047611-147076662	Zfp534	2	0	2	0.037037
chr4:73296797-73303176	LOC100502924	2	0	2	0.037037
chr4:86232356-86232474	Scarna8	2	0	2	0.037037
chr4:88422665-88423633	Gm13289	2	0	2	0.037037
chr4:88425753-88426564	Gm13272	2	0	2	0.037037
chr4:88442645-88444107	Gm13278	2	0	2	0.037037
chr4:88452089-88452638	Gm13285	2	0	2	0.037037
chr5:11918042-11922804	4933402N22Rik	2	0	2	0.037037
chr5:73398142-73404194	Slc10a4	2	0	2	0.037037
chr6:124520447-124531062	C1rb	2	0	2	0.037037
chr6:130168622-130181705	Klra7	2	0	2	0.037037
chr6:130168848-130183340	Klra7	2	0	2	0.037037
chr6:132156812-132160539	Prb1	2	0	2	0.037037
chr6:132519859-132522419	Prh1	2	0	2	0.037037
chr6:66502176-66509702	Vmn1r32	2	0	2	0.037037
chr7:10561593-10577488	Vmn2r49	2	0	2	0.037037
chr7:10622583-10638527	Vmn2r50	2	0	2	0.037037
chr7:110698881-110704018	Olfr613	2	0	2	0.037037
chr7:110865109-110866060	Olfr243	2	0	2	0.037037
chr7:12761541-12762462	Vmn1r79	2	0	2	0.037037
chr7:24593304-24594219	Vmn1r175	2	0	2	0.037037
chr7:39303157-39313212	Gm5591	2	0	2	0.037037
chr7:50432957-50447479	Zfp936	2	0	2	0.037037
chr7:5959351-5962612	Vmn1r65	2	0	2	0.037037
chr8:22805483-22806325	Defa-ps1	2	0	2	0.037037
chr9:109173638-109190190	Fbxw14	2	0	2	0.037037
chr9:123891781-123893241	Ccr1l1	2	0	2	0.037037
chr9:32122367-32151822	Kcnj5	2	0	2	0.037037
chr9:38175132-38176128	Olfr250	2	0	2	0.037037
chr9:88979461-88987673	Trim43b	2	0	2	0.037037
chrX:10882780-10883098	Gm14475	0	1	1	0.0344828
chrX:10895411-10895853	Gm14478	0	1	1	0.0344828
chrX:10895450-10895768	Gm14475	0	1	1	0.0344828
chrX:10898578-10899020	Gm14478	0	1	1	0.0344828
chrX:10898617-10898935	Gm14475	0	1	1	0.0344828
chrX:24051433-24077886	Gm5934	0	1	1	0.0344828
chrX:30823249-30824027	LOC100862314	0	1	1	0.0344828
chrX:32944181-32967071	Gm10096	0	1	1	0.0344828
chrX:32944181-32967088	Gm10486	0	1	1	0.0344828
chrX:32944209-32967088	Gm10230	0	1	1	0.0344828
chrX:32944212-32967069	Gm10488	0	1	1	0.0344828
chrX:32944212-32967084	Gm10058	0	1	1	0.0344828
chrX:32944241-32967088	Gm10147	0	1	1	0.0344828
chrX:34826611-34831313	Rhox2b	0	1	1	0.0344828
chrX:35037938-35042776	Rhox3g-ps	0	1	1	0.0344828
chrX:35053618-35057977	Rhox2g	0	1	1	0.0344828
chrX:35083503-35087784	Rhox2h	0	1	1	0.0344828
chrX:64092226-64092300	Mir465	0	1	1	0.0344828
chrX:75485800-75491260	Gm14743	0	1	1	0.0344828
chrX:8563025-8563881	Gm14458	0	1	1	0.0344828
chrX:10876382-10876883	Gm14483	1	0	1	0.0344828
chr1:94387394-94388330	Olfr1415	1	0	1	0.0185185
chr10:128611106-128612110	Olfr772	1	0	1	0.0185185
chr10:21893326-21903720	Raet1e	1	0	1	0.0185185
chr10:22026525-22032748	C920009B18Rik	1	0	1	0.0185185
chr10:99829132-99830046	Gm4301	1	0	1	0.0185185
chr10:99844280-99845194	Gm4301	1	0	1	0.0185185
chr11:73218951-73223325	Olfr75-ps1	1	0	1	0.0185185
chr11:73218951-73223360	Olfr75-ps1	1	0	1	0.0185185
chr11:73266776-73267712	Olfr380	1	0	1	0.0185185
chr11:73797163-73798108	Olfr398	1	0	1	0.0185185
chr11:73934792-73935740	Olfr401	1	0	1	0.0185185
chr12:20810252-20821640	1700030C10Rik	1	0	1	0.0185185
chr12:88855265-88859215	Gm8300	1	0	1	0.0185185
chr12:88943614-88949795	Oog1	1	0	1	0.0185185
chr12:88959817-88963905	BB287469	1	0	1	0.0185185
chr12:88959858-88963093	Gm4027	1	0	1	0.0185185
chr12:89055024-89059124	BB287469	1	0	1	0.0185185
chr12:89192923-89199120	Oog1	1	0	1	0.0185185
chr12:89192923-89199126	Gm2042	1	0	1	0.0185185
chr12:89521310-89525514	Gm7104	1	0	1	0.0185185
chr12:9036802-9043200	Ttc32	1	0	1	0.0185185
chr13:21902235-21902749	Hist1h2ao	1	0	1	0.0185185
chr13:21902335-21902728	Hist1h2ap	1	0	1	0.0185185
chr13:22648069-22648978	Vmn1r204	1	0	1	0.0185185
chr13:27186057-27192129	Prl3d1	1	0	1	0.0185185
chr13:50340549-50345677	Gm906	1	0	1	0.0185185
chr13:50793697-50798778	Gm8765	1	0	1	0.0185185
chr13:62554375-62568172	Zfp935	1	0	1	0.0185185
chr13:62862098-62862206	Mir713	1	0	1	0.0185185
chr13:67768377-67784449	Zfp738	1	0	1	0.0185185
chr14:44020916-44026344	1700001F09Rik	1	0	1	0.0185185
chr14:51272913-51273858	Olfr746	1	0	1	0.0185185
chr14:8156501-8164909	Gm5797	1	0	1	0.0185185
chr15:63648742-63651095	1700065I16Rik	1	0	1	0.0185185
chr15:77414587-77426555	Apol10b	1	0	1	0.0185185
chr17:15101152-15115776	Gm3417	1	0	1	0.0185185
chr17:19190456-19218275	Vmn2r98	1	0	1	0.0185185
chr17:19499098-19531554	Vmn2r99	1	0	1	0.0185185
chr17:23141937-23143626	Vmn2r-ps129	1	0	1	0.0185185
chr17:32673573-32688742	Cyp4f16	1	0	1	0.0185185
chr17:36175353-36179637	H2-T9	1	0	1	0.0185185
chr17:36175353-36179647	H2-T22	1	0	1	0.0185185
chr17:36806952-36809142	H2-M1	1	0	1	0.0185185
chr17:38776391-38782598	Gm20516	1	0	1	0.0185185
chr17:53855833-53873168	4932415M13Rik	1	0	1	0.0185185
chr17:53863075-53865058	4932415M13Rik	1	0	1	0.0185185
chr17:7109064-7152705	Rsph3b	1	0	1	0.0185185
chr17:7229891-7291946	Gm1604b	1	0	1	0.0185185
chr18:74019040-74038788	Mro	1	0	1	0.0185185
chr19:11543857-11547226	Ms4a6c	1	0	1	0.0185185
chr19:11543857-11556686	Ms4a6c	1	0	1	0.0185185
chr19:13239505-13240444	Olfr1461	1	0	1	0.0185185
chr19:17400630-17414058	Gcnt1	1	0	1	0.0185185
chr19:33629770-33664801	Lipo1	1	0	1	0.0185185
chr19:34682446-34687891	I830012O16Rik	1	0	1	0.0185185
chr19:39841562-39887304	Cyp2c40	1	0	1	0.0185185
chr2:10403381-10403476	Mir669a-2	1	0	1	0.0185185
chr2:10403383-10403480	Mir669a-1	1	0	1	0.0185185
chr2:10403387-10403474	Mir669a-10	1	0	1	0.0185185
chr2:177249446-177263899	Gm14420	1	0	1	0.0185185
chr2:177282930-177297016	Gm14403	1	0	1	0.0185185
chr2:177493992-177507980	Gm14322	1	0	1	0.0185185
chr2:37075010-37075940	Olfr366	1	0	1	0.0185185
chr2:85270039-85270984	Olfr994	1	0	1	0.0185185
chr2:85924886-85926011	Olfr1037	1	0	1	0.0185185
chr2:86262875-86263831	Olfr1062	1	0	1	0.0185185
chr2:86516555-86517488	Olfr1086	1	0	1	0.0185185
chr2:86530188-86531130	Olfr1087	1	0	1	0.0185185
chr2:86861766-86862699	Olfr1104	1	0	1	0.0185185
chr2:87742898-87743831	Olfr1154	1	0	1	0.0185185
chr2:87845973-87846933	Olfr1160	1	0	1	0.0185185
chr2:88114265-88115204	Olfr1173	1	0	1	0.0185185
chr2:88365657-88366747	Olfr1186	1	0	1	0.0185185
chr2:89322345-89323290	Olfr1241	1	0	1	0.0185185
chr3:59533707-59556319	Gm5538	1	0	1	0.0185185
chr3:64294742-64311607	Vmn2r5	1	0	1	0.0185185
chr3:93740554-93747465	Gm9125	1	0	1	0.0185185
chr3:93851902-93858807	Gm9125	1	0	1	0.0185185
chr4:101613011-101615788	Gm12794	1	0	1	0.0185185
chr4:118362107-118363055	Olfr1342	1	0	1	0.0185185
chr4:118382013-118382952	Olfr1341	1	0	1	0.0185185
chr4:143860535-143870369	Pramel5	1	0	1	0.0185185
chr4:145651165-145679000	1700095A21Rik	1	0	1	0.0185185
chr4:146437474-146442545	4933438K21Rik	1	0	1	0.0185185
chr4:146506201-146554688	Gm13139	1	0	1	0.0185185
chr4:146514185-146556724	Znf41-ps	1	0	1	0.0185185
chr4:61492352-61496214	Mup5	1	0	1	0.0185185
chr4:73311921-73318299	LOC100502924	1	0	1	0.0185185
chr4:88430957-88432419	Gm13276	1	0	1	0.0185185
chr4:88436798-88438260	Gm13278	1	0	1	0.0185185
chr4:88451929-88452897	Gm13289	1	0	1	0.0185185
chr5:105544785-105568571	Gbp4	1	0	1	0.0185185
chr5:105544785-105568605	Gbp4	1	0	1	0.0185185
chr5:109644520-109653641	Vmn2r14	1	0	1	0.0185185
chr5:109715287-109726575	Vmn2r15	1	0	1	0.0185185
chr5:109983727-109988012	Crlf2	1	0	1	0.0185185
chr5:110362581-110370729	LOC100642166	1	0	1	0.0185185
chr5:147337376-147340129	Gm3404	1	0	1	0.0185185
chr5:23216793-23216894	Mir3096	1	0	1	0.0185185
chr6:122086645-122100976	Gm10319	1	0	1	0.0185185
chr6:124480361-124492339	C1s	1	0	1	0.0185185
chr6:124480361-124492377	C1s	1	0	1	0.0185185
chr6:128656525-128673064	Klrb1	1	0	1	0.0185185
chr6:128829478-128841142	BC035044	1	0	1	0.0185185
chr6:128921177-128934725	Clec2g	1	0	1	0.0185185
chr6:132261607-132264761	Prpmp5	1	0	1	0.0185185
chr6:132311122-132314152	Gm8882	1	0	1	0.0185185
chr6:132545963-132550720	Prp2	1	0	1	0.0185185
chr6:133242233-133245808	5530400C23Rik	1	0	1	0.0185185
chr6:3322256-3349571	Samd9l	1	0	1	0.0185185
chr6:43065742-43066675	Olfr441	1	0	1	0.0185185
chr7:110961037-110962417	Hbb-b2	1	0	1	0.0185185
chr7:110961041-110962437	Hbb-b1	1	0	1	0.0185185
chr7:110990151-110991676	Hbb-bh1	1	0	1	0.0185185
chr7:111041323-111042985	Olfr64	1	0	1	0.0185185
chr7:113949023-113949974	Olfr700	1	0	1	0.0185185
chr7:114271865-114272996	Olfr715	1	0	1	0.0185185
chr7:115098156-115099089	Olfr474	1	0	1	0.0185185
chr7:115302431-115303385	Olfr485	1	0	1	0.0185185
chr7:12737812-12738754	Vmn1r78	1	0	1	0.0185185
chr7:12778313-12779240	Vmn1r80	1	0	1	0.0185185
chr7:12806664-12811156	Gm4224	1	0	1	0.0185185
chr7:12845107-12846028	Vmn1r81	1	0	1	0.0185185
chr7:134525773-134530680	9130019O22Rik	1	0	1	0.0185185
chr7:14318854-14364986	Sult2a2	1	0	1	0.0185185
chr7:147760053-147760986	Olfr538	1	0	1	0.0185185
chr7:24289660-24290608	Vmn1r167	1	0	1	0.0185185
chr7:24443334-24445682	Vmn1r172	1	0	1	0.0185185
chr7:24737405-24738375	Vmn1r180	1	0	1	0.0185185
chr7:26301060-26325023	Ceacam2	1	0	1	0.0185185
chr7:27716649-27724405	Cyp2a22	1	0	1	0.0185185
chr7:32488797-32490773	Scgb2b7	1	0	1	0.0185185
chr7:32497683-32498999	Scgb1b7	1	0	1	0.0185185
chr7:34158252-34159577	Scgb1b20	1	0	1	0.0185185
chr7:34522211-34524314	Scgb2b24	1	0	1	0.0185185
chr7:34528817-34530122	Scgb1b24	1	0	1	0.0185185
chr7:34728015-34730004	Scgb2b26	1	0	1	0.0185185
chr7:34796950-34798961	Scgb2b27	1	0	1	0.0185185
chr7:34806585-34807900	Scgb1b27	1	0	1	0.0185185
chr7:46511993-46519904	LOC100861861	1	0	1	0.0185185
chr7:46662663-46668530	Gm5114	1	0	1	0.0185185
chr7:49515422-49556125	Vmn2r61	1	0	1	0.0185185
chr7:50072196-50122604	Gm2381	1	0	1	0.0185185
chr7:5098091-5099024	Vmn1r55	1	0	1	0.0185185
chr7:51268047-51272335	Klk1b26	1	0	1	0.0185185
chr7:51268080-51272338	Egfbp2	1	0	1	0.0185185
chr7:68880422-68880488	Mir344e	1	0	1	0.0185185
chr7:93100376-93109992	Vmn2r74	1	0	1	0.0185185
chr7:93296551-93320234	Vmn2r75	1	0	1	0.0185185
chr8:107355543-107362552	Ces2b	1	0	1	0.0185185
chr8:36528318-36558587	Eri1	1	0	1	0.0185185
chr8:36645556-36652074	Gm16793	1	0	1	0.0185185
chr8:36650851-36742503	Mfhas1	1	0	1	0.0185185
chr8:36887762-36889613	Cldn23	1	0	1	0.0185185
chr8:36927138-36946011	5430403N17	1	0	1	0.0185185
chr8:37157881-37210841	D8Ertd82e	1	0	1	0.0185185
chr8:37279117-37312570	Lonrf1	1	0	1	0.0185185
chr8:44710328-44712539	Gm5346	1	0	1	0.0185185
chr9:19612763-19613693	Olfr859	1	0	1	0.0185185
chr9:37800076-37801024	Olfr881	1	0	1	0.0185185
chr9:37833392-37834322	Olfr883	1	0	1	0.0185185
chr9:37854808-37855738	Olfr884	1	0	1	0.0185185
chr9:38185467-38186418	Olfr251	1	0	1	0.0185185
chr9:38280333-38281266	Olfr905	1	0	1	0.0185185
chr9:78137734-78153332	Gm10639	1	0	1	0.0185185
chr9:88736635-88753639	9330159M07Rik	1	0	1	0.0185185
chr9:88736635-88753708	9330159M07Rik	1	0	1	0.0185185
