# Supplementary material for: Divergence patterns of genic copy number variation in natural populations of the house mouse (Mus musculus domesticus) reveal three conserved genes with major population-specific expansions
Source: Genome Res. 2015 Aug;25(8):1114–24. doi: 10.1101/gr.187187.114 (PMC4509996; doi:10.1101/gr.187187.114)
Supplement: Supplemental Material [file supp_gr.187187.114_Supp_Table_S7.xlsx]

## Sheet: Vst all
Table S7. Vst values of CNV genes
	Vst
Coordinates (mm9)	FRA:IRA	FRA:GER	FRA:HEL	IRA:GER	IRA:HEL	GER:HEL	Gene Symbol
chr13:33753273-33763454	0.97	0.21	0.08	0.96	0.94	0	Serpinb6d
chr13:33576658-33587869	0.94	0.24	0.61	0.99	0.95	0.94	Serpinb9g
chr3:113052095-113061617	0.93	0.57	0.94	0.8	0.41	0.84	Amy2a5
chr3:113115366-113126970	0.92	0.72	0.93	0.72	0.49	0.81	Amy2a2
chr3:113117374-113126832	0.92	0.69	0.93	0.74	0.44	0.82	Amy2a5
chr3:113082754-113094367	0.91	0.61	0.92	0.71	0.4	0.8	Amy2a2
chr3:113084762-113094229	0.91	0.56	0.91	0.75	0.37	0.8	Amy2a5
chr3:113147966-113159576	0.9	0.58	0.91	0.71	0.32	0.77	Amy2a2
chr3:113149974-113159438	0.89	0.51	0.89	0.73	0.24	0.77	Amy2a5
chr4:145207048-145214297	0.85	0.44	0.81	0.72	0	0.71	Gm13212
chr14:56568645-56571208	0.83	0.82	0.79	0	0.45	0.5	Mcpt-ps1
chr19:40164168-40166823	0.83	0.62	0	0.8	0.07	0.41	Cyp2c50
chr14:59863277-59879053	0.82	0.9	0.75	0.88	0.81	0	Gm6904
chr8:107391323-107397982	0.82	0.14	0	0.59	0.85	0.16	Ces2d-ps
chr14:56560287-56563498	0.81	0.79	0.73	0.18	0.02	0.55	Cma1
chr17:13397907-13399077	0.81	0.71	0.95	0.48	0.4	0.89	Gm10512
chr13:33415945-33427235	0.81	0.2	0.23	1	0.98	0.97	Serpinb9f
chr7:66933880-66933970	0.8	0.58	0.01	0.24	0.52	0.15	Snord116
chr2:175017505-175163713	0.8	0.04	0	0.39	0.77	0.05	0610010B08Rik
chr15:75258035-75262259	0.79	0	0.07	0.78	0.63	0	9030619P08Rik
chr4:60510884-60514832	0.78	0.08	0.7	0.39	0.96	0	Mup1
chr4:145260599-145294340	0.77	0.09	0.76	0.51	0.17	0.24	Gm13242
chr7:110975036-110976442	0.77	0	0.74	0.7	0	0.65	Beta-s
chr14:44740831-44749036	0.76	0.52	0.77	0.48	0.49	0.7	4930503E14Rik
chr14:44534733-44540745	0.76	0.32	0.77	0.61	0.66	0.74	Ang3
chr2:175100624-175109351	0.76	0.27	0.41	0.33	0.52	0	Gm14288
chr2:177563695-177575023	0.76	0.12	0.05	0.17	0.63	0.02	Gm14325
chr12:18521315-18542060	0.76	0.03	0.05	0.05	0.61	0	5730507C01Rik
chr2:175791443-175800170	0.75	0.28	0.32	0.34	0.53	0	Gm14288
chr2:177757988-177767215	0.75	0.01	0.48	0.47	0.44	0.03	Etohi1
chr5:16981939-16986754	0.75	0	0	0.73	0.57	0	Speer4f
chr4:41902018-41925853	0.75	0	0.82	0.55	0.27	0.63	4933409K07Rik
chr12:104680376-104681890	0.74	0.61	0.66	0	0	0	Ifi27l2a
chr17:13414053-13420524	0.74	0.56	0.89	0.41	0.04	0.7	Smok2a
chr17:13427736-13429320	0.74	0.54	0.89	0.42	0.02	0.7	Smok2b
chr14:44579490-44579934	0.74	0.46	0.67	0.46	0	0.46	Ang6
chr2:177249446-177263899	0.74	0.31	0	0.2	0.67	0.18	Gm14420
chr4:60511805-60514832	0.74	0.06	0.65	0.39	0.94	0	Mup1
chr7:92886293-92903491	0.74	0	0.11	0.77	0.58	0.43	Vmn2r72-ps
chr2:177757988-177770564	0.74	0	0.42	0.42	0.45	0	Etohi1
chr13:61872939-61888642	0.73	0.49	0.35	0.98	0.97	0	BC052688
chr6:67515227-67515693	0.73	0.29	0.46	0.13	0	0	4930515G16Rik
chr7:110665924-110666896	0.73	0	0.16	0.78	0.62	0.22	Olfr611
chr4:42452732-42476567	0.73	0	0.81	0.51	0.28	0.61	4933409K07Rik
chr7:110880441-110881392	0.72	0.53	0.96	0.63	0.08	0.94	Olfr628
chr14:8377664-8401080	0.72	0.49	0.88	0.19	0	0.22	Gm3558
chr14:44500562-44501033	0.72	0.4	0.58	0.65	0.04	0.53	Ear10
chr19:12975338-12976268	0.72	0.08	0	0.69	0.6	0	Olfr1447
chr7:115238110-115239082	0.72	0.01	0	0.58	0.16	0	Olfr482
chr7:110865109-110866060	0.72	0	0.91	0.67	0.53	0.84	Olfr243
chr4:61711268-61715151	0.71	0.65	0.72	0.05	0.26	0.09	Mup20
chr2:177631867-177662555	0.71	0.2	0.43	0.12	0.37	0	Gm14327
chr4:113835988-113917633	0.7	0.1	0.82	0.43	0.75	0.69	Skint11
chr7:51443632-51447821	0.7	0	0.32	0.75	0.83	0.44	Klk1b24
chr4:42535970-42541769	0.69	0.07	0.81	0.61	0.58	0.81	Gm13298
chr15:63722819-63743852	0.69	0	0.93	0.67	0.92	0.94	Gsdmc4
chr2:175100625-175112306	0.68	0.3	0.41	0.21	0.37	0	Gm14440
chr8:107370967-107378382	0.68	0.11	0	0.55	0.64	0.13	Ces2c
chr4:41812375-41813375	0.68	0	0.75	0.64	0.66	0.73	LOC100041579
chr4:41836783-41842582	0.68	0	0.81	0.63	0.49	0.8	Gm13298
chr4:60732253-60736153	0.67	0.12	0.77	0.36	0.96	0	Mup12
chr4:41812375-41813410	0.67	0	0.74	0.64	0.66	0.73	Gm13308
chr2:175788488-175800169	0.66	0.33	0.3	0.19	0.38	0	Gm14440
chr17:13244186-13245146	0.66	0.04	0.39	0.45	0.14	0.1	Gpr31b
chr6:128656525-128673064	0.65	0.42	0.89	0	0.29	0.31	Klrb1
chr4:145054112-145057864	0.65	0.17	0.03	0.51	0.59	0.01	Smarca5-ps
chr13:62469075-62484534	0.65	0.17	0	0.02	0.58	0.1	Gm3604
chr7:20707004-20707928	0.64	0.16	0.85	0.13	0	0.12	Gm16442
chr14:44396430-44397304	0.64	0.09	0.46	0.3	0	0.12	Ear1
chr15:9265352-9300625	0.64	0	0	0.59	0.58	0	Ugt3a2
chr5:105544785-105568571	0.64	0	0.36	0.05	0.26	0	Gbp4
chr5:105544785-105568605	0.64	0	0.36	0.05	0.25	0	Gbp4
chr4:60432031-60434824	0.63	0.16	0.24	0.45	0.85	0.01	Mup9
chr2:177282930-177297016	0.63	0.16	0	0.43	0.52	0.08	Gm14403
chr7:11379589-11384414	0.63	0.01	0.21	0.68	0.43	0.27	Zscan4a
chr14:57633970-57637819	0.61	0.63	0.5	0.42	0.33	0.01	B020004C17Rik
chr6:128612402-128627392	0.61	0.42	0.82	0	0.02	0.15	Clec2h
chr17:35607033-35611508	0.61	0.28	0.51	0.42	0	0.38	H2-Q10
chr4:147128082-147183897	0.61	0.13	0.52	0.33	0	0.21	Gm13157
chr12:22990696-23046943	0.61	0.08	0	0.58	0.47	0.04	2410018L13Rik
chr2:177493992-177507980	0.61	0.05	0	0.24	0.57	0.1	Gm14322
chr7:110987637-110989035	0.61	0	0.85	0.62	0.55	0.84	Hbb-bh2
chrX:8091177-8102080	0.6	0.63	0.73	0.25	0.14	0.56	Gm14459
chr7:11746991-11751497	0.6	0.22	0.09	0.28	0.41	0.05	Zscan4d
chr4:143538484-143540919	0.6	0.14	0.6	0	0.89	0.5	Gm13109
chr2:111289298-111290216	0.59	0.61	0.45	0	0	0.01	Olfr1287
chr2:111260188-111261106	0.59	0.59	0.37	0	0	0	Olfr1286
chr2:10410742-10410829	0.59	0.45	0.87	0.81	0.95	0.69	Mir669p-1
chr4:60885338-60889318	0.59	0.41	0.05	0.81	0.62	0.54	Mup13
chr2:174887049-174893264	0.59	0.24	0.01	0	0.43	0.12	Gm14393
chr8:19933241-19958780	0.59	0.22	0.73	0.22	0	0.32	Gm15319
chr4:60079340-60083347	0.59	0.02	0	0.58	0.64	0	Mup7
chr3:106004408-106022397	0.59	0	0.49	0.53	0.85	0.18	Chi3l4
chr13:50340549-50345677	0.59	0	0.07	0.43	0.31	0	Gm906
chr4:60961068-60965030	0.58	0.31	0	0.82	0.73	0.44	Mup14
chrX:71986265-71987527	0.58	0	0.07	0.58	0.5	0.14	Gm6890
chr7:20686506-20687430	0.58	0	0.46	0.43	0.19	0.11	Vmn1r91
chr8:19981359-20020392	0.56	0.17	0.69	0.21	0	0.32	2610005L07Rik
chr2:175018480-175032418	0.56	0.02	0.12	0.23	0.34	0	Gm6710
chr2:175010665-175032425	0.56	0.01	0.06	0.2	0.36	0	Gm14391
chrX:89177284-89178319	0.55	0.38	0.34	0	0.61	0.55	Gm5071
chr2:87708149-87709082	0.55	0.2	0	0	0.45	0.17	Olfr1152
chr10:127213460-127229753	0.55	0.08	0	0.61	0.44	0	Rdh9
chr2:175019779-175032425	0.55	0.03	0.13	0.24	0.32	0	Gm14391
chr4:146034924-146036119	0.55	0.02	0.33	0.3	0.22	0	Gm13034
chr4:41985509-41986640	0.55	0	0.35	0.66	0.04	0.5	Ccl21c
chr4:3099229-3100150	0.54	0.32	0.42	0.03	0	0	Vmn1r2
chr17:22738114-22756100	0.54	0.24	0.53	0.13	0.1	0.25	Vmn2r112
chr8:19991155-20020278	0.54	0.18	0.69	0.2	0	0.27	6820431F20Rik
chr8:19863863-19893010	0.54	0.16	0.69	0.24	0	0.31	6820431F20Rik
chr2:175868376-175882314	0.54	0.02	0.22	0.21	0.28	0	Gm6710
chr2:175868369-175881015	0.54	0.01	0.25	0.23	0.27	0	Gm14391
chr4:41985545-41986640	0.54	0	0.36	0.67	0.03	0.52	Ccl21b
chr7:7503677-7519497	0.54	0	0.41	0.52	0	0.39	Vmn2r33
chr1:95757920-95773071	0.54	0	0	0.2	0.57	0	Gal3st2
chr4:60149719-60152729	0.53	0.36	0.64	0.55	0.91	0.04	Mup2
chrX:30598310-30600259	0.53	0.25	0.01	0.79	0.1	0.47	Gm2799
chr11:73600441-73601377	0.53	0.09	0	0.84	0.81	0.42	Olfr390
chr4:60671338-60675267	0.53	0.07	0.03	0.31	0.8	0.01	Mup11
chr5:11749832-11769308	0.52	0.31	0.09	0.7	0	0.42	1700003C15Rik
chrX:3748193-3749684	0.52	0.29	0	0.73	0.19	0.4	Gm3750
chr7:22902340-22903264	0.52	0.14	0.77	0.06	0.02	0.19	Gm16442
chr19:12964138-12965065	0.52	0.05	0.08	0.63	0.54	0	Olfr1446
chr4:42391949-42393044	0.52	0	0.19	0.63	0.2	0.21	Ccl21b
chr4:42391949-42393080	0.52	0	0.18	0.63	0.22	0.22	Ccl21c
chr4:41774206-41775337	0.52	0	0.31	0.61	0.11	0.39	Ccl21c
chr7:67021820-67021910	0.52	0	0.13	0.37	0.26	0	Snord116
chr2:177801582-177813130	0.52	0	0.34	0.19	0.15	0.01	Zfp931
chr7:49515422-49556125	0.52	0	0.65	0.14	0	0.09	Vmn2r61
chr19:33629770-33664801	0.51	0.61	0.47	0	0	0	Lipo1
chrX:3242047-3243544	0.51	0.5	0	0.72	0.24	0.55	Gm3750
chrX:3241669-3243629	0.51	0.46	0	0.71	0.26	0.48	Gm14345
chrX:3241674-3243629	0.51	0.46	0	0.71	0.26	0.48	Gm3706
chrX:3241678-3243629	0.51	0.46	0	0.71	0.26	0.48	Gm14351
chrX:3241680-3243584	0.51	0.46	0	0.71	0.27	0.48	Mgclh
chrX:3241680-3243601	0.51	0.46	0	0.71	0.26	0.48	Mgclh
chrX:4446526-4448017	0.51	0.41	0.05	0.73	0.05	0.49	Gm3750
chrX:4446441-4448390	0.51	0.4	0	0.73	0.12	0.48	Gm3706
chr4:60148804-60152729	0.51	0.34	0.64	0.52	0.89	0.03	Mup2
chrX:3748108-3750057	0.51	0.32	0	0.75	0.24	0.41	Gm3706
chr17:13547437-13570089	0.51	0.24	0.94	0.25	0.58	0.91	Tcp10c
chr4:41774242-41775337	0.51	0	0.3	0.62	0.14	0.4	Ccl21b
chrX:72082534-72088694	0.5	0.35	0.53	0.4	0.19	0.49	Gm5936
chr7:110398599-110401019	0.5	0.12	0	0.14	0.37	0	Dub2a
chr5:15028949-15033007	0.5	0.02	0.95	0.19	0.01	0.38	Gm17019
chr11:99664983-99665760	0.5	0	0.51	0.51	0.06	0.5	Gm11554
chr12:20810252-20821640	0.5	0	0	0.51	0.36	0	1700030C10Rik
chr4:111754074-111840681	0.5	0	0.5	0.22	0.02	0.23	Skint4
chr2:129195637-129201469	0.49	0.59	0	0	0.11	0.09	Gm14047
chr19:8136698-8206472	0.49	0.2	0.01	0.22	0.31	0.04	Slc22a28
chrX:151461743-151467835	0.49	0.1	0	0.02	0	0	Magea2
chr19:13659795-13660743	0.49	0.09	0.35	0.28	0.07	0	Olfr1484
chr17:38691136-38697566	0.49	0.01	0.05	0.66	0.84	0	Gm20410
chr11:99664861-99665760	0.49	0	0.5	0.49	0.05	0.43	Gm11569
chr6:128829478-128841142	0.49	0	0.14	0.35	0.52	0.23	BC035044
chr2:150083252-150096036	0.48	0.51	0.54	0	0.19	0.34	Gm14124
chr4:60672252-60675243	0.48	0.1	0.09	0.32	0.83	0.01	Mup2
chr19:13604164-13605112	0.48	0	0	0.54	0.4	0	Olfr1480
chr7:11891726-11896031	0.48	0	0.41	0.48	0.02	0.33	Zscan4e
chr6:60229036-60353701	0.48	0	0.16	0.43	0.74	0.19	A530053G22Rik
chr7:150822629-150835543	0.47	0.7	0.58	0.09	0.02	0	Tnfrsf22
chr11:58315099-58316056	0.47	0.16	0	0.15	0.62	0.35	Olfr331
chr4:60231492-60235471	0.47	0.09	0.45	0.29	0.67	0	Mup8
chr1:90123594-90158864	0.47	0	0.52	0.37	0.03	0.29	Heatr7b1
chrX:30977792-30979742	0.46	0.4	0	0.68	0.25	0.21	Gm2825
chrX:30977820-30979741	0.46	0.4	0	0.68	0.25	0.21	Mgclh
chrX:30977837-30979741	0.46	0.4	0	0.68	0.25	0.21	Mgclh
chr1:85242918-85267141	0.46	0.35	0	0.01	0.42	0.37	C130026I21Rik
chr4:146064712-146094024	0.46	0.23	0.49	0.13	0.1	0	Gm13051
chr8:19729575-19753527	0.46	0.22	0.78	0.17	0.02	0.54	LOC100861668
chr8:19729575-19753602	0.46	0.22	0.78	0.17	0.02	0.54	4930467E23Rik
chr5:138307056-138312986	0.46	0.06	0.46	0.22	0.79	0.62	Pilrb2
chrX:30732633-30734583	0.45	0.36	0	0.74	0.09	0.52	Gm2799
chrX:30732633-30734588	0.45	0.36	0	0.74	0.09	0.52	Gmcl1l
chr6:131493779-131503775	0.45	0.32	0.59	0.16	0	0.51	5430401F13Rik
chr4:42625690-42626785	0.45	0	0.11	0.7	0.53	0.35	Ccl21b
chr4:42625654-42626785	0.45	0	0.11	0.69	0.53	0.36	Ccl21c
chr5:105644717-105668552	0.45	0	0	0.41	0.44	0.01	Gbp10
chr2:177677315-177691994	0.45	0	0.27	0.11	0.05	0	Gm14326
chr5:138293374-138299277	0.44	0.66	0.66	0.02	0.28	0.2	Pilrb1
chrX:3665477-3667437	0.44	0.45	0	0.62	0.2	0.39	Gm14346
chrX:3665486-3667437	0.44	0.45	0	0.62	0.2	0.39	Gm14351
chr9:109225399-109242173	0.44	0.45	0.18	0	0.15	0.2	Fbxw28
chrX:30732661-30734582	0.44	0.35	0	0.74	0.08	0.52	Mgclh
chrX:30732678-30734582	0.44	0.34	0	0.74	0.08	0.52	Mgclh
chr3:93629941-93631039	0.44	0.19	0.28	0.1	0.2	0	Tdpoz3
chr7:11591093-11595896	0.44	0.04	0.51	0.47	0.08	0.33	Zscan4c
chr7:12626647-12627568	0.44	0	0	0.46	0.46	0	Vmn1r77
chrX:70319683-70327846	0.44	0	0	0.46	0.04	0	Xlr4a
chr10:78710521-78757280	0.44	0	0	0.44	0.31	0	Vmn2r81
chr16:59361124-59362042	0.44	0	0.33	0.35	0.91	0.29	Olfr207
chr2:150043834-150070610	0.43	0.77	0.89	0.71	0.86	0	Zfp937
chrX:30291071-30293031	0.43	0.51	0	0.68	0.28	0.41	Gm10921
chrX:30291080-30293031	0.43	0.51	0	0.68	0.28	0.41	Gm14351
chrX:30291082-30292986	0.43	0.51	0	0.68	0.28	0.41	Mgclh
chrX:30291082-30293003	0.43	0.51	0	0.68	0.28	0.41	Mgclh
chrX:3461360-3463320	0.43	0.46	0	0.69	0.19	0.38	Gm14345
chrX:3461369-3463320	0.43	0.46	0	0.69	0.19	0.38	Gm14351
chrX:3461371-3463275	0.43	0.46	0	0.69	0.19	0.38	Mgclh
chrX:3461371-3463292	0.43	0.46	0	0.69	0.19	0.38	Mgclh
chr9:109225751-109242173	0.43	0.45	0.18	0	0.15	0.19	Fbxw28
chrX:4074963-4076923	0.43	0.38	0	0.7	0.17	0.26	Gm10921
chrX:3993613-3995573	0.43	0.32	0.01	0.63	0.08	0.45	Gm10922
chr6:66586816-66587746	0.43	0.29	0.48	0.15	0.32	0.56	Vmn1r34
chr19:13936284-13937235	0.43	0.22	0.63	0.25	0	0.28	Olfr1502
chr17:31278006-31281227	0.43	0.13	0	0	0	0	Tff2
chr13:62231249-62275296	0.43	0	0	0.47	0.38	0	Zfp808
chr16:98283676-98303604	0.43	0	0	0.46	0.27	0.03	A630089N07Rik
chr5:14933630-14938475	0.43	0	0.53	0.27	0.02	0.18	Speer4e
chr2:89457324-89458402	0.42	0.01	0.21	0.24	0.06	0.05	Olfr1248
chr4:112058573-112106590	0.42	0.01	0.51	0.13	0.03	0.23	Skint9
chr15:77355296-77363745	0.42	0	0.25	0.43	0.78	0.25	Apol7c
chr5:138478451-138491861	0.42	0	0.2	0.42	0.45	0.08	Smok3b
chr15:74938590-74942379	0.42	0	0	0.36	0.38	0	Ly6c2
chrX:75485800-75491260	0.42	0	0.31	0.35	0.47	0.33	Gm14743
chr14:36908150-36910041	0.42	0	0.02	0.26	0.47	0.12	4930474N05Rik
chr17:18222020-18273607	0.41	0.4	0.24	0.7	0.57	0	Vmn2r91
chrX:4598165-4600108	0.41	0.21	0.35	0.55	0	0.54	Gm3763
chrX:151523061-151524333	0.41	0.17	0.74	0	0.26	0.21	Magea1
chr17:15164114-15178523	0.41	0.08	0.46	0.11	0.08	0.26	Gm3417
chr17:15164117-15178523	0.41	0.08	0.46	0.11	0.08	0.26	Tcte3
chr17:34419695-34424716	0.41	0	0.88	0.33	0.95	0.85	H2-Aa
chr6:124520447-124531062	0.41	0	0.42	0.3	0.81	0.49	C1rb
chr10:21864109-21869076	0.41	0	0.1	0.19	0	0.01	E030030I06Rik
chr17:36245974-36248621	0.4	0.18	0.13	0.06	0.01	0	C920025E04Rik
chr17:38776391-38782598	0.4	0.11	0	0.23	0.51	0.31	Gm20516
chr17:15146803-15159413	0.4	0.1	0.43	0.04	0.06	0.15	Gm3435
chr19:12133298-12134240	0.4	0.09	0.35	0.07	0	0.1	Olfr1424
chr14:5923635-5933553	0.39	0.46	0.92	0	0.45	0.59	Gm3383
chr6:47613580-47613754	0.39	0.32	0.46	0	0	0	Rn4.5s
chr15:74875444-74879267	0.39	0.12	0	0.1	0.17	0	Ly6c1
chr6:85710624-85715738	0.39	0.05	0.96	0.41	0.65	0.82	Cml3
chr3:97214139-97215102	0.39	0	0.79	0.53	0.92	0.81	Olfr1402
chr5:138462503-138475887	0.39	0	0.31	0.41	0.46	0.11	Smok3a
chr5:138462656-138475893	0.39	0	0.31	0.4	0.46	0.12	Smok3a
chr7:110935725-110940344	0.39	0	0.97	0.29	0.75	0.94	Olfr67
chr7:110925909-110926857	0.38	0.39	0.23	0	0	0	Olfr68
chr15:74874447-74879267	0.38	0.25	0	0.04	0.25	0.15	Ly6c1
chr14:26802490-26809652	0.38	0.12	0.57	0.07	0.45	0.46	Gm10391
chr17:15132746-15147148	0.38	0.12	0.44	0.02	0.09	0.16	Gm3417
chr3:93600319-93601432	0.38	0.11	0.45	0	0	0	Tdpoz4
chr17:22684907-22710240	0.38	0.07	0.51	0.03	0.13	0.19	Vmn2r111
chr1:90159687-90165983	0.38	0	0.45	0.28	0	0.24	6430706D22Rik
chr10:99808605-99809515	0.38	0	0.79	0.24	0.3	0.7	Gm4303
chr19:13993511-13994462	0.37	0.29	0.06	0	0.43	0.42	Olfr1505
chrX:31875768-31877469	0.37	0.24	0	0.63	0.12	0.5	Gm2933
chr4:146437474-146442545	0.37	0.08	0.63	0.09	0	0.19	4933438K21Rik
chr4:42349016-42349771	0.37	0.04	0.45	0.42	0.44	0.66	Ccl27b
chr15:74875902-74879093	0.37	0.03	0	0.16	0.21	0	Ly6c1
chr4:42349016-42354418	0.37	0.02	0.41	0.36	0.25	0.52	Ccl27b
chr17:13253976-13275092	0.37	0	0.47	0.51	0	0.66	Tcp10b
chrX:35037938-35042776	0.37	0	0.52	0.24	0.7	0.45	Rhox3g-ps
chr5:14910123-14914889	0.37	0	0.37	0.18	0.04	0.05	Gm9758
chr4:146395958-146434908	0.37	0	0.43	0.13	0.01	0.03	Rex2
chr17:39210635-39213982	0.36	0.29	0.27	0	0.03	0	Gm20581
chr4:147047611-147076662	0.36	0.27	0.56	0.04	0	0	Zfp534
chr14:4126976-4144402	0.36	0.27	0.7	0	0	0.1	Gm5796
chr3:93875543-93876566	0.36	0.26	0.04	0	0.03	0	Gm10697
chr8:127536896-127558092	0.36	0	0	0.27	0.47	0.01	Tsnax
chr14:44769271-44790902	0.36	0	0.45	0.22	0.67	0.24	1700047E10Rik
chr3:94497494-94508328	0.36	0	0.06	0.16	0.21	0	Selenbp2
chr4:88400771-88401320	0.36	0	0.43	0.15	0.03	0.19	Gm13271
chr4:145850602-145889553	0.36	0	0.36	0.13	0.03	0.02	Rex2
chr5:10865028-10870808	0.36	0	0.58	0	0.03	0.11	Gm6455
chr16:36184297-36188196	0.35	0.76	0.18	0	0.05	0.21	Gm5483
chr14:6727191-6737109	0.35	0.59	0.95	0	0.36	0.61	Gm3383
chrX:30245481-30247441	0.35	0.46	0	0.65	0.19	0.35	Gm10921
chr17:39173639-39177172	0.35	0.24	0.2	0	0.09	0	Esp24
chr11:82815659-82834224	0.35	0.16	0.82	0	0.65	0.4	Slfn8
chr11:82815659-82834312	0.35	0.16	0.82	0	0.65	0.4	Slfn8
chr17:31345010-31379348	0.35	0.13	0.31	0.03	0	0	Ubash3a
chr13:22446214-22447117	0.35	0.11	0	0.2	0.1	0	Vmn1r198
chr14:26802490-26809318	0.35	0.11	0.53	0.07	0.39	0.44	Duxbl
chr17:37247986-37248925	0.35	0.06	0.14	0.14	0.08	0	Olfr92
chr15:74875902-74879267	0.35	0.04	0	0.13	0.21	0	Ly6c1
chr1:90203286-90285426	0.35	0.02	0	0.04	0.2	0	Trpm8
chr9:37923382-37924312	0.35	0.01	0.09	0.15	0.48	0.25	Olfr889
chr7:111448410-111464009	0.35	0	0.15	0.37	0.58	0.07	Trim12a
chr12:104689107-104695433	0.34	0.44	0.74	0	0.03	0.15	Ifi27l2b
chr17:15101152-15115776	0.34	0.18	0.43	0	0.09	0	Gm3417
chr14:43688720-43694109	0.34	0.17	0.25	0	0.58	0.44	Gm10377
chr7:149459668-149460268	0.34	0	0.53	0.68	0.21	0.85	Gm4559
chr9:88490162-88494081	0.34	0	0.09	0.46	0.1	0.23	9430037G07Rik
chr1:90155430-90174154	0.34	0	0.36	0.28	0	0.22	Hjurp
chr4:146986044-147016617	0.34	0	0.15	0.25	0.11	0.04	2610305D13Rik
chr7:114958099-114959020	0.33	0.47	0	0	0.2	0.38	Olfr467
chr8:22812995-22814119	0.33	0.4	0.76	0	0.42	0.3	AY761184
chr4:118481459-118482467	0.33	0.36	0	0	0	0	Olfr1335
chr14:43371374-43376742	0.33	0.25	0.31	0	0.56	0.5	Gm10377
chrX:151358554-151360658	0.33	0.18	0.42	0	0.19	0	Magea6
chr17:15115827-15128541	0.33	0.15	0.48	0	0.19	0.05	9030025P20Rik
chr11:50840505-50841447	0.33	0.1	0.09	0.14	0.39	0.38	Olfr54
chr17:36301388-36305482	0.33	0.09	0	0.15	0.51	0.08	Gm8909
chr17:13301482-13324657	0.33	0.07	0.2	0.14	0.05	0	Unc93a
chr7:24487360-24488302	0.33	0.03	0.02	0.25	0.24	0.12	Vmn1r173
chr17:36252815-36258389	0.33	0.02	0.02	0.25	0.15	0	H2-T10
chr17:36252820-36258380	0.33	0.02	0.02	0.25	0.15	0	H2-T10
chr4:42786391-42787523	0.33	0.01	0.06	0.57	0.27	0.27	Ccl21a
chr4:42786391-42787525	0.33	0.01	0.06	0.57	0.27	0.27	Gm1987
chr11:99670391-99671210	0.33	0	0.2	0.29	0.72	0.29	Krtap4-13
chr3:93455463-93456608	0.33	0	0.08	0.28	0.13	0.02	Tdpoz2
chr1:90161402-90174132	0.33	0	0.32	0.27	0	0.2	A730008H23Rik
chr5:105242186-105289087	0.33	0	0.89	0.26	0.8	0.92	Zfp951
chr7:51480806-51484987	0.33	0	0	0.22	0.07	0	Klk1
chr10:99808603-99814636	0.33	0	0.78	0.21	0.26	0.68	Gm4302
chr17:30531769-30533125	0.33	0	0.4	0.21	0	0.21	Gm6402
chr6:128837631-128846866	0.33	0	0.02	0.14	0.39	0.14	Clec2i
chr4:146124224-146166150	0.33	0	0.29	0.12	0.04	0	Zfp600
chr4:146125090-146166150	0.33	0	0.29	0.12	0.04	0	Zfp600
chr13:113884034-113891189	0.32	0.49	0.06	0	0.46	0.69	Gzma
chr17:8231374-8294093	0.32	0.21	0.25	0	0	0	Gm1604b
chr4:63023482-63026911	0.32	0.17	0.4	0.12	0.35	0.42	Orm2
chr7:23385002-23404469	0.32	0.11	0	0	0	0	Gm4541
chr17:36264553-36266370	0.32	0.09	0	0.04	0.25	0	Gm7030
chr7:110565209-110567688	0.32	0.09	0.52	0.04	0.33	0.38	Usp17l5
chr17:35531043-35532575	0.32	0.07	0.44	0	0.01	0.06	H2-Q5
chr7:114249425-114250373	0.32	0.06	0.28	0.1	0	0.12	Gm10081
chr17:20166388-20185169	0.32	0.03	0	0.29	0.17	0	Vmn2r104
chr4:61439361-61443258	0.32	0.02	0	0.42	0.73	0	Mup19
chr4:42024167-42029569	0.32	0	0.36	0.45	0.38	0.58	Ccl27b
chr17:18288893-18322142	0.32	0	0	0.36	0.06	0	Vmn2r92
chr6:124480361-124492377	0.32	0	0.51	0.24	0.95	0.42	C1s
chr3:93978333-93982115	0.32	0	0.15	0.09	0.04	0	Gm10696
chrX:3907010-3908970	0.31	0.68	0	0.6	0.28	0.3	Gm14347
chrX:3907038-3908959	0.31	0.67	0	0.6	0.28	0.3	Mgclh
chrX:3907055-3908959	0.31	0.67	0	0.6	0.28	0.3	Mgclh
chrX:3410667-3412618	0.31	0.55	0	0.61	0.25	0.27	Gm14351
chrX:3410667-3412627	0.31	0.55	0	0.61	0.25	0.28	Gm14345
chrX:31750506-31752466	0.31	0.38	0	0.6	0.21	0.23	Gm2913
chrX:31750515-31752466	0.31	0.38	0	0.6	0.21	0.24	Gm14351
chr5:138667131-138693103	0.31	0.36	0	0.18	0.21	0.21	Nxpe5
chr17:34111603-34115736	0.31	0.19	0.81	0.18	0.48	0.82	H2-K2
chr7:21196232-21215690	0.31	0.11	0	0	0	0	Gm4541
chr7:22230791-22250942	0.31	0.11	0	0	0	0	Gm4541
chr7:22713597-22733746	0.31	0.1	0	0	0	0	Gm4541
chr17:34400171-34406363	0.31	0.09	0.95	0.43	0.91	0.82	H2-Ab1
chr5:15158105-15162877	0.31	0.07	0.36	0.05	0	0.01	4930572O03Rik
chr4:42349016-42351113	0.31	0.02	0.39	0.35	0.46	0.6	Ccl27b
chr4:61096818-61100736	0.31	0	0.27	0.5	0	0.53	Mup15
chr14:3262412-3305842	0.31	0	0.14	0.47	0.85	0.75	1700110I01Rik
chr14:3609810-3650049	0.31	0	0.52	0.47	0.86	0.72	1700110I01Rik
chr7:11983263-11987667	0.31	0	0.05	0.38	0.14	0.12	Zscan4f
chr4:120988920-120997522	0.31	0	0.17	0.31	0.08	0.31	Gm12888
chr7:51251248-51255245	0.31	0	0.05	0.3	0.26	0.11	Klk1b11
chr6:124480361-124492339	0.31	0	0.51	0.24	0.95	0.42	C1s
chr4:86232356-86232474	0.31	0	0	0	0.34	0	Scarna8
chrX:70420640-70422328	0.3	0.36	0.18	0.64	0	0.49	4930408F14Rik
chr4:60591132-60595027	0.3	0.36	0.84	0.47	0.93	0	Mup10
chr3:93764213-93765236	0.3	0.34	0.14	0	0	0	Gm10697
chrX:35053618-35057977	0.3	0.13	0	0.01	0.47	0.2	Rhox2g
chr14:7010438-7020406	0.3	0	0.32	0.47	0.83	0.65	Gm10408
chr4:42339258-42349747	0.3	0	0.33	0.45	0.37	0.58	Gm2002
chr14:3555026-3564989	0.3	0	0.24	0.44	0.77	0.47	Gm10408
chr17:34624350-34634374	0.3	0	0	0.41	0.3	0	Btnl5
chr5:11340407-11346273	0.3	0	0.46	0.38	0	0.5	Speer1-ps1
chr11:58654617-58655544	0.3	0	0	0.19	0.32	0.07	Olfr311
chr7:24362203-24363118	0.3	0	0.08	0.05	0.05	0	Vmn1r169
chr13:33284827-33295849	0.29	0.46	0	0.12	0.19	0.33	Serpinb9d
chrX:31750733-31752434	0.29	0.36	0	0.59	0.19	0.27	Gm2933
chr8:3803124-3803361	0.29	0.07	0	0.54	0	0	Rprl3
chr12:24728066-24782134	0.29	0.02	0.21	0	0.66	0.24	9030624G23Rik
chr7:22948136-22949054	0.29	0.02	0.94	0	0.65	0.51	Vmn1r142
chr4:42669532-42679294	0.29	0	0.33	0.46	0.49	0.61	Gm13305
chr14:3849203-3889441	0.29	0	0.47	0.45	0.85	0.67	1700110I01Rik
chr4:42028838-42039327	0.29	0	0.34	0.45	0.44	0.6	Gm2002
chr4:42339259-42349021	0.29	0	0.32	0.44	0.36	0.57	Gm13305
chr4:42027472-42029569	0.29	0	0.4	0.4	0.59	0.65	Ccl27b
chr14:42668556-42674084	0.29	0	0.48	0.08	0.57	0.3	1700091H14Rik
chr14:27081743-27088586	0.28	0.27	0.43	0	0.01	0	Duxbl
chr3:93851902-93858807	0.28	0.03	0.45	0	0	0	Gm9125
chr17:38088995-38089967	0.28	0.02	0.16	0.46	0	0.42	Olfr761
chr6:132156812-132160539	0.28	0.01	0	0.15	0.11	0	Prb1
chr3:92019756-92026413	0.28	0	0.2	0.46	0.54	0.35	Sprr2a1
chr4:42668806-42679295	0.28	0	0.32	0.46	0.46	0.61	Gm2002
chr4:42029564-42039326	0.28	0	0.34	0.45	0.43	0.61	Gm13305
chr7:31707390-31709200	0.28	0	0	0.35	0.45	0	Hamp2
chr19:12979720-12981475	0.28	0	0.16	0.3	0.28	0.12	Gm5512
chr4:42028814-42029569	0.28	0	0.34	0.29	0.53	0.44	Ccl27b
chr10:99813726-99814636	0.28	0	0.74	0.2	0.28	0.7	Gm4303
chr10:99813724-99824881	0.28	0	0.78	0.19	0.29	0.71	Gm4302
chr10:99823971-99824881	0.28	0	0.55	0.19	0.09	0.53	Gm4303
chrX:31349046-31350997	0.27	0.43	0	0.58	0.12	0.28	Gm2863
chr2:87845973-87846933	0.27	0.28	0	0	0.16	0.18	Olfr1160
chr14:27081743-27088920	0.27	0.25	0.45	0	0.02	0	Gm10391
chr17:13714321-13721300	0.27	0.23	0	0	0.51	0.32	Smok4a
chr19:39841562-39887304	0.27	0.14	0.13	0	0.06	0	Cyp2c40
chr13:61665989-61671487	0.27	0.12	0.73	0.02	0.22	0	Cts3
chr8:22389440-22390140	0.27	0.1	0.49	0.05	0.21	0.5	Gm15292
chr6:123974775-124012053	0.27	0.08	0.25	0.29	0.2	0.03	Vmn2r26
chr9:88736635-88753639	0.27	0.07	0	0.35	0.18	0.04	9330159M07Rik
chr9:88736635-88753708	0.27	0.07	0	0.35	0.18	0.04	9330159M07Rik
chr11:114892799-114899083	0.27	0.07	0.58	0.26	0.11	0.27	Gm11710
chr17:31391964-31414301	0.27	0.07	0.05	0.03	0	0	Rsph1
chrX:34884374-34888286	0.27	0.06	0.5	0	0.63	0.46	Rhox3c
chr16:3592397-3593339	0.27	0	0	0.31	0.18	0	Olfr161
chr7:111392970-111410750	0.27	0	0.15	0.29	0.42	0.03	Trim34a
chr7:111463544-111473352	0.27	0	0.09	0.26	0.46	0.01	LOC622070
chr4:111904849-111973073	0.27	0	0.5	0.07	0.01	0.23	Skint3
chr4:111905025-111970850	0.27	0	0.5	0.07	0.01	0.23	Skint3
chr7:20752808-20753726	0.27	0	0.92	0.04	0.45	0.6	Vmn1r142
chr7:21882587-21883532	0.26	0.35	0	0.04	0.01	0.17	Vmn1r121
chr11:48798830-48805748	0.26	0.3	0.54	0.62	0.82	0	Tgtp1
chr11:48798830-48805756	0.26	0.3	0.54	0.62	0.82	0	Tgtp2
chrX:121240947-121249519	0.26	0.3	0.06	0	0	0	Vmn2r121
chr6:41392212-41396096	0.26	0.26	0.54	0	0	0	Gm10334
chr10:33486229-33501921	0.26	0.22	0.1	0.03	0.05	0	Gm4794
chr14:56590264-56592832	0.26	0.15	0.62	0.41	0.76	0.16	Cma2
chr6:132519859-132522419	0.26	0.14	0	0.15	0.15	0.41	Prh1
chr14:51874936-51875787	0.26	0.09	0.09	0	0.06	0	Ear11
chr17:24035688-24037754	0.26	0.07	0.25	0	0.73	0.5	Dcpp2
chr7:51268047-51272335	0.26	0.04	0	0.26	0.39	0.05	Klk1b26
chr7:51268080-51272338	0.26	0.04	0	0.26	0.38	0.04	Egfbp2
chr4:143649028-143659221	0.26	0.04	0	0.19	0.09	0	Pramel4
chr11:114882041-114888326	0.26	0	0.33	0.27	0	0.26	Gm11710
chr7:24538929-24539871	0.26	0	0.18	0.18	0.07	0	Vmn1r174
chrX:99998301-100005281	0.26	0	0.44	0.14	0.07	0.35	Dmrtc1c1
chr5:145790468-145793633	0.26	0	0.91	0.1	0.59	0.69	Gm4871
chr10:81274930-81289235	0.26	0	0.95	0	0.93	0.79	Gm10778
chr9:109173638-109190190	0.25	0.39	0.51	0	0	0.01	Fbxw14
chr13:50639994-50640103	0.25	0.33	0	0	0.28	0.53	Mir683-1
chr7:21309847-21315960	0.25	0.17	0	0	0	0	Gm4567
chr7:31727387-31729036	0.25	0.17	0	0	0.19	0.12	Hamp
chr11:83517557-83519771	0.25	0.1	0.09	0	0.24	0	Wfdc17
chr7:114988300-114989245	0.25	0.08	0	0.1	0.1	0	Olfr470
chr7:19374473-19383859	0.25	0.07	0.12	0.4	0.03	0.31	Psg19
chr13:120276845-120284312	0.25	0.07	0.26	0.01	0	0	Gm7120
chr13:120277666-120284312	0.25	0.07	0.26	0.01	0	0	Gm7120
chrX:145317118-145358682	0.25	0.06	0	0	0.03	0	Luzp4
chr13:23323983-23324910	0.25	0.04	0	0.43	0.29	0	Vmn1r222
chr3:92054568-92061226	0.25	0	0.2	0.41	0.75	0.34	Sprr2a1
chr17:6600795-6607794	0.25	0	0.02	0.4	0.45	0.07	Dynlt1f
chr17:6600903-6607786	0.25	0	0.02	0.39	0.44	0.07	Dynlt1c
chr11:71055931-71098734	0.25	0	0.7	0.28	1	0.33	Nlrp1c
chr19:34682446-34687891	0.25	0	0	0.28	0.39	0	I830012O16Rik
chr7:11486088-11490399	0.25	0	0.11	0.28	0.05	0.15	Zscan4b
chr4:42664135-42669537	0.25	0	0.34	0.27	0.28	0.5	Ccl27b
chr19:39683348-39723532	0.25	0	0.09	0.22	0.09	0.42	Cyp2c67
chr10:99844280-99845194	0.25	0	0.71	0.2	0.11	0.65	Gm4301
chr4:146927385-146959310	0.25	0	0.62	0.19	0.01	0.4	Gm13154
chr1:31321691-31324906	0.25	0	0.19	0.17	0.03	0.07	Gm4850
chr5:147313974-147316759	0.25	0	0.43	0.09	0.57	0.35	4930449I24Rik
chrX:67198455-67199155	0.24	0.75	0.76	0.22	0.62	0.56	1700020N15Rik
chr4:114971650-115005420	0.24	0.46	0.11	0.12	0.09	0	Cyp4a12a
chr6:47626562-47626736	0.24	0.41	0.14	0	0.02	0.12	Rn4.5s
chr1:176321176-176322186	0.24	0.32	0.59	0	0.68	0.67	Olfr248
chr6:47617916-47618090	0.24	0.3	0	0	0.14	0.2	Rn4.5s
chr6:47630883-47631057	0.24	0.25	0.22	0	0	0	Rn4.5s
chr14:44180291-44185678	0.24	0.19	0.02	0	0.48	0.3	Gm10375
chr7:21509530-21515643	0.24	0.13	0	0	0	0	Gm4567
chr17:36192760-36195316	0.24	0.09	0.02	0	0.66	0.42	Gm11127
chr17:34938292-34941371	0.24	0.08	0	0	0.08	0	Cyp21a1
chr17:38267193-38268135	0.24	0.06	0	0.01	0	0	Olfr132
chr2:176493061-176507478	0.24	0.02	0.35	0.02	0.21	0.19	OTTMUSG00000016609
chr17:6806387-6812617	0.24	0	0.01	0.53	0.58	0.18	Dynlt1f
chr17:6806495-6812609	0.24	0	0.01	0.53	0.56	0.18	Dynlt1c
chr14:3794429-3804392	0.24	0	0.29	0.37	0.79	0.58	Gm10408
chr7:16335718-16344623	0.24	0	0	0.24	0	0	Obox5
chr2:103911166-103925114	0.24	0	0	0.23	0.18	0.19	Cd59b
chr6:85742110-85754051	0.24	0	0.73	0.2	0.63	0.73	Alms1-ps2
chr12:105486105-105492615	0.24	0	0.28	0.18	0.39	0.22	Serpina3h
chr14:44680318-44681196	0.24	0	0.14	0.15	0	0.07	Ear2
chr9:19517272-19518202	0.23	0.59	0.09	0.67	0.36	0	Olfr857
chr2:122310676-122353776	0.23	0.55	0.36	0	0	0.07	Gm14085
chr8:13835230-13838089	0.23	0.45	0.43	0.59	0.54	0	AF366264
chr7:16132605-16142195	0.23	0.32	0.2	0	0.23	0.39	Obox1
chrX:34784986-34789685	0.23	0.25	0	0.47	0.21	0.06	Rhox2a
chr7:16418598-16425028	0.23	0.16	0.78	0	0.44	0.02	Obox6
chr5:147302938-147305708	0.23	0.13	0.43	0	0.51	0.42	Gm6370
chr11:101286398-101296979	0.23	0.09	0.03	0.3	0.35	0	Rundc1
chr8:28406516-28407672	0.23	0.08	0.05	0.57	0.13	0.36	Gm9731
chr7:25453030-25457069	0.23	0.07	0.02	0.5	0.35	0	Tex101
chr7:111618528-111656363	0.23	0.07	0.99	0.25	0.92	0.63	Trim30d
chr2:176583304-176593409	0.23	0.05	0.29	0.05	0.53	0.28	Gm14295
chr2:176493061-176506522	0.23	0.01	0.35	0.01	0.22	0.2	Gm14305
chr14:3224445-3234357	0.23	0	0.25	0.46	0.76	0.52	D830030K20Rik
chr7:5432057-5445453	0.23	0	0.18	0.21	0	0.22	Vmn2r28
chr4:49456403-49463981	0.23	0	0.38	0.18	0.63	0.26	Acnat1
chr7:18931156-18940356	0.23	0	0.39	0.1	0.02	0.34	Psg18
chr5:147313952-147328478	0.23	0	0.31	0.06	0.22	0.22	Gm3415
chr14:52383566-52393265	0.22	0.54	0.82	0.06	0.71	0.8	Ang4
chr17:36166921-36169646	0.22	0.43	0.65	0	0.55	0.85	H2-T23
chr14:8244986-8255199	0.22	0.41	0.93	0.57	0.93	0.35	4933406F09Rik
chr2:150923980-150929545	0.22	0.25	0.17	0	0	0	Gm14151
chr10:112362483-112366082	0.22	0.16	0.08	0.07	0.09	0	Atxn7l3b
chr19:11543857-11547226	0.22	0.12	0.09	0.01	0	0	Ms4a6c
chr2:10422959-10423054	0.22	0.11	0.17	0.58	0.52	0	Mir669a-2
chr2:111970027-111970972	0.22	0.11	0.04	0.08	0.05	0	Olfr1316
chr4:118382013-118382952	0.22	0.06	0.18	0.1	0	0.17	Olfr1341
chr6:130065243-130079916	0.22	0.03	0	0	0.37	0.17	Klra8
chr6:130065244-130079853	0.22	0.03	0	0	0.37	0.17	Klra8
chr17:6600795-6610127	0.22	0	0.03	0.38	0.36	0.09	Dynlt1f
chr4:42667440-42669537	0.22	0	0.33	0.26	0.39	0.54	Ccl27b
chr5:73398142-73404194	0.22	0	0.01	0.23	0.31	0.06	Slc10a4
chr10:128787620-128788565	0.22	0	0.66	0.2	0.42	0.62	Olfr782
chr11:49365250-49366186	0.22	0	0	0.13	0.09	0	Olfr1381
chr7:7624539-7642109	0.22	0	0	0.07	0.64	0.02	Vmn2r34
chr14:5731119-5754402	0.21	0.42	0.96	0	0.5	0.69	Gm3500
chr6:41408928-41413785	0.21	0.28	0.58	0	0	0	Prss1
chr6:18816317-18829584	0.21	0.16	0	0.03	0.02	0	Ankrd7
chr8:12395518-12399555	0.21	0.15	0	0	0.16	0.12	Sox1
chr17:37222135-37223181	0.21	0.07	0.09	0	0	0	Olfr90
chr5:15124916-15129682	0.21	0.07	0.22	0	0	0	Speer4d
chr17:6814820-6825643	0.21	0	0.06	0.29	0.5	0.08	Tmem181c-ps
chr19:13961750-13962698	0.21	0	0	0.25	0.11	0	Olfr1504
chr4:42768056-42770050	0.21	0	0.14	0.17	0	0.11	Ccl19
chr14:15160626-15161580	0.21	0	0.14	0.07	0.47	0.24	Olfr31
chr7:110531575-110532514	0.21	0	0.55	0.06	0	0.27	Olfr603
chr5:146585558-146617450	0.2	0.62	0.61	0.32	0.24	0.16	Cyp3a44
chrX:10882780-10883098	0.2	0.55	0.29	0.37	0.1	0	Gm14475
chrX:31060181-31060959	0.2	0.37	0.02	0.43	0.23	0	Gm2837
chrX:8640215-8640948	0.2	0.34	0.28	0.47	0	0.77	Gm5635
chr9:35477223-35480474	0.2	0.31	0	0	0.22	0.44	Pate2
chr5:147349223-147352003	0.2	0.27	0.05	0	0.69	0.67	Gm3409
chr6:47604919-47605093	0.2	0.23	0.34	0	0	0	Rn4.5s
chr2:111219158-111220094	0.2	0.21	0.07	0	0	0	Olfr1284
chr7:114240980-114241928	0.2	0.19	0.22	0	0	0.01	Olfr17
chr10:43935230-43939391	0.2	0.18	0.17	0.14	0.09	0	Speer5-ps1
chr6:129849008-129863242	0.2	0.15	0	0.04	0.31	0.12	Klra5
chr7:23498616-23504729	0.2	0.14	0	0	0	0	Gm4567
chr2:150912521-150918086	0.2	0.12	0.09	0	0	0	Gm14151
chr8:22437072-22438054	0.2	0.12	0.73	0	0.34	0.48	Defa5
chr2:10422961-10423058	0.2	0.11	0.17	0.58	0.51	0	Mir669a-1
chr2:10422965-10423052	0.2	0.11	0.17	0.57	0.51	0	Mir669a-10
chr9:123891781-123893241	0.2	0.08	0.68	0	0.43	0.24	Ccr1l1
chrX:150457322-150468370	0.2	0.05	0.03	0	0	0	4921511M17Rik
chrX:150457322-150468372	0.2	0.05	0.03	0	0	0	Gm10057
chr14:46703701-46704632	0.2	0.03	0.07	0.05	0.26	0.25	Gm1821
chr17:6853656-6860656	0.2	0	0.03	0.36	0.45	0.1	Dynlt1f
chr17:6853664-6860548	0.2	0	0.03	0.36	0.44	0.1	Dynlt1c
chr5:96161110-96165192	0.2	0	0.64	0.36	0.3	0.81	BC061212
chr17:6635807-6646630	0.2	0	0.05	0.28	0.49	0.07	Tmem181c-ps
chr18:37571327-37574168	0.2	0	0.07	0.22	0.29	0.25	Pcdhb10
chr15:82233275-82237624	0.2	0	0.33	0.21	0	0.37	Cyp2d10
chr6:133714016-133717421	0.2	0	0	0.2	0.09	0	Gm5886
chr7:21837885-21838803	0.2	0	0	0.19	0	0	Vmn1r120
chr15:77529318-77549718	0.2	0	0.28	0.12	0.19	0	Apol7b
chrX:88725464-88726499	0.19	0.69	0.11	0.66	0.26	0.51	Gm5072
chr4:143689782-143700004	0.19	0.37	0	0.41	0.16	0	Gm13102
chr1:108974769-108980057	0.19	0.33	0	0	0	0.06	Serpinb3d
chr10:129855316-129866668	0.19	0.27	0	0.41	0.05	0.51	Vmn2r85
chr3:14363116-14374239	0.19	0.18	0.15	0	0	0	Gm6300
chr17:19910326-19949500	0.19	0.16	0.11	0.24	0	0.14	Vmn2r103
chr11:58644657-58645584	0.19	0.07	0.28	0	0.54	0.46	Olfr312
chr2:85193151-85194081	0.19	0.06	0.05	0	0	0	Olfr988
chr17:6851323-6860656	0.19	0	0.03	0.36	0.36	0.11	Dynlt1f
chr13:33241143-33250220	0.19	0	0	0.12	0	0	Serpinb9c
chr7:147362002-147362956	0.19	0	0.18	0.12	0	0.08	Olfr523
chr16:11203475-11225889	0.19	0	0.14	0.11	0.01	0.03	2610020C07Rik
chr7:110902663-110905864	0.19	0	0.75	0.1	0.75	0.66	Olfr630
chr7:110961037-110962417	0.19	0	0.76	0.09	0.43	0.72	Hbb-b2
chr7:110961041-110962437	0.19	0	0.76	0.09	0.44	0.72	Hbb-b1
chr2:85847934-85848867	0.19	0	0	0.08	0.07	0	Olfr1032
chr5:23215834-23218485	0.19	0	0.62	0.08	0.35	0.71	AI506816
chr6:128798061-128841142	0.19	0	0.18	0.08	0.43	0.21	BC035044
chr17:37095536-37102568	0.19	0	0.11	0.03	0.02	0.01	Znrd1as
chr2:86975537-86976476	0.19	0	0.14	0	0	0	Olfr1110
chr6:90219099-90220047	0.19	0	0	0	0	0	Vmn1r54
chr14:6653871-6677154	0.18	0.38	0.96	0	0.55	0.71	Gm3500
chr17:36315721-36318309	0.18	0.31	0.12	0	0.63	0.69	Gm6623
chr4:63005599-63009196	0.18	0.21	0.49	0	0.67	0.56	Orm1
chr9:88734001-88743028	0.18	0.2	0.12	0.4	0.29	0.03	Trim43c
chr4:61252962-61256864	0.18	0.19	0.19	0.54	0.05	0.47	Mup17
chr17:12571474-12612250	0.18	0.07	0.1	0	0	0	Plg
chr13:50793697-50798778	0.18	0.05	0	0	0.12	0.02	Gm8765
chrX:31428919-31429697	0.18	0.02	0.27	0.05	0.68	0.6	LOC100862314
chr7:7264984-7290204	0.18	0	0.55	0.48	0.27	0.98	Vmn2r30
chr7:21796550-21797474	0.18	0	0	0.38	0	0.08	Vmn1r119
chr14:3500848-3668655	0.18	0	0.47	0.33	0.82	0.75	Gm5795
chr14:3740251-3906698	0.18	0	0.41	0.33	0.81	0.7	Gm5795
chr13:33241143-33251623	0.18	0	0	0.2	0	0.02	Serpinb9c
chr6:124462638-124473458	0.18	0	0.44	0.04	0.93	0.49	C1ra
chr17:37085299-37088737	0.18	0	0.11	0.03	0	0.02	Ppp1r11
chr17:37091302-37095373	0.18	0	0.12	0.03	0	0.02	Znrd1
chr1:87473474-87495385	0.18	0	0.26	0.01	0.46	0.05	Sp110
chr7:22057197-22058121	0.18	0	0.03	0.01	0	0	Vmn1r125
chr7:5754330-5755233	0.17	0.5	0.28	0	0	0	Vmn1r187
chr3:88172538-88173642	0.17	0.31	0.44	0.25	0.78	0.94	Bglap-rs1
chr6:130241178-130256450	0.17	0.27	0	0	0.12	0.22	Klra13-ps
chr17:33336006-33336954	0.17	0.12	0.1	0	0	0	Olfr239
chr5:15186527-15220414	0.17	0.09	0.29	0	0	0	Speer7-ps1
chr4:143379236-143385488	0.17	0.07	0.95	0.27	0.75	0.59	Gm13023
chr2:176181276-176194747	0.17	0.04	0.37	0	0.42	0.37	Gm14308
chr17:19190456-19218275	0.17	0.03	0.07	0	0.01	0	Vmn2r98
chr7:22134391-22135315	0.17	0.03	0	0	0	0	Vmn1r128
chr17:54100939-54129956	0.17	0.01	0	0.35	0.16	0	Sult1c1
chr9:38175132-38176128	0.17	0	0	0.22	0	0	Olfr250
chr5:11918042-11922804	0.17	0	0.36	0.17	0.66	0.17	4933402N22Rik
chr4:42248503-42250497	0.17	0	0	0.09	0	0	Ccl19
chr1:90108533-90116577	0.17	0	0	0.08	0.15	0.04	Ugt1a1
chr14:5153653-5162268	0.17	0	0.63	0.06	0.05	0.51	4930555G01Rik
chr17:37114645-37118182	0.17	0	0.11	0	0.17	0	2410137M14Rik
chr7:17234378-17242827	0.17	0	0.53	0	0.99	0.35	Ceacam-ps1
chrX:151487603-151496096	0.17	0	0.34	0	0	0.02	Magea5
chrX:34961481-34965404	0.16	0.69	0.31	0.23	0.4	0.64	Rhox3e
chr5:94806364-94813359	0.16	0.28	0.04	0.01	0.59	0.68	AA792892
chr6:130241178-130258379	0.16	0.26	0	0	0.11	0.2	Klra23
chr4:42231042-42232176	0.16	0.2	0.14	0.61	0	0.54	Gm1987
chr4:42231044-42232176	0.16	0.2	0.14	0.61	0	0.54	Ccl21a
chr1:173769827-173785228	0.16	0.15	0.08	0.37	0.25	0	Cd84
chr1:155350145-155396844	0.16	0.03	0.8	0.45	0.92	0.79	Npl
chr17:6648832-6655064	0.16	0	0	0.48	0.63	0.12	Dynlt1f
chr4:42668782-42669537	0.16	0	0.22	0.37	0.14	0.59	Ccl27b
chr5:149965703-149967768	0.16	0	0.07	0.32	0.45	0.03	Gm8615
chr11:49308036-49308966	0.16	0	0	0.29	0.03	0.1	Olfr1385
chr15:77449397-77457828	0.16	0	0.14	0.26	0.57	0.08	Gm8221
chr1:179921565-179978422	0.16	0	0.52	0.18	0.16	0.09	Gm16432
chr2:175917414-175930232	0.16	0	0.3	0.09	0.61	0.39	Gm14431
chr7:24839792-24840710	0.16	0	0	0.05	0.55	0	Vmn1r183
chr9:38280333-38281266	0.16	0	0	0.05	0	0	Olfr905
chr7:55453582-55454548	0.16	0	0.67	0.02	0.88	0.74	Mrgprb4
chr7:16486994-16489379	0.16	0	0.45	0	0.35	0.14	Crxos1
chr7:114966036-114966981	0.15	0.29	0	0	0	0.03	Olfr469
chrX:35061007-35065834	0.15	0.26	0	0.15	0.21	0.35	Rhox4g
chr2:181725930-181735792	0.15	0.18	0.04	0.4	0.24	0	Gm14496
chr13:61260575-61265549	0.15	0.18	0.07	0	0	0.03	Ctsr
chr7:24057806-24060262	0.15	0.18	0.02	0	0	0	Gm6902
chr6:113574014-113581627	0.15	0.1	0.19	0	0.08	0.49	Vhl
chr3:93740554-93747465	0.15	0.06	0.5	0	0	0	Gm9125
chr5:109424557-109435455	0.15	0.04	0	0	0.02	0	Vmn2r10
chr13:62554375-62568172	0.15	0.02	0.02	0.25	0	0	Zfp935
chr7:22103962-22104880	0.15	0.01	0	0	0.02	0	Vmn1r127
chr17:6648841-6654956	0.15	0	0	0.47	0.61	0.12	Dynlt1c
chr8:22805483-22806325	0.15	0	0	0.28	0.36	0	Defa-ps1
chr12:106429254-106433609	0.15	0	0.29	0.14	0.14	0.22	Tcl1b3
chr11:99659386-99665764	0.15	0	0.3	0.13	0	0.22	Krtap4-13
chr7:24737405-24738375	0.15	0	0	0.13	0	0	Vmn1r180
chr6:41901626-41906097	0.15	0	0	0	0	0	Sval1
chr6:129606363-129610614	0.14	0.51	0.54	0.08	0.16	0.02	Klrc2
chr6:129606388-129610574	0.14	0.51	0.53	0.08	0.16	0.02	Klrc2
chr8:22455224-22456066	0.14	0.48	0	0.22	0.24	0.46	Gm15299
chr7:108727373-108729675	0.14	0.4	0.21	0.31	0.43	0.09	Art2b
chr16:36404031-36408449	0.14	0.28	0	0.08	0.25	0.41	Stfa2
chr17:39543303-39547937	0.14	0.13	0.03	0.3	0.15	0.03	Gm20579
chr7:21509530-21511986	0.14	0.09	0.14	0	0	0	Gm6902
chr7:67006618-67006708	0.14	0.06	0.33	0.43	0.15	0.54	Snord116
chr19:11543857-11556686	0.14	0.06	0	0.06	0.24	0.09	Ms4a6c
chr4:143747458-143752554	0.14	0.04	0	0.08	0.07	0	Oog3
chr17:31091627-31147655	0.14	0.01	0.14	0.11	0.03	0.11	Umodl1
chr10:128611106-128612110	0.14	0	0	0.3	0.3	0	Olfr772
chr17:6270474-6305783	0.14	0	0.03	0.23	0.26	0.05	Tmem181a
chr4:136957468-136965706	0.14	0	0.56	0.22	0.64	0.86	Gm13011
chr10:129883254-129892950	0.14	0	0	0.14	0.08	0	Vmn2r86
chr4:143309357-143319061	0.14	0	0.97	0.1	0.76	0.64	Gm13078
chr16:36277233-36285457	0.14	0	0	0.07	0.01	0	Stfa1
chr7:3788411-3796653	0.14	0	0.09	0.07	0	0.06	Pira2
chr17:34161927-34162037	0.14	0	0	0.02	0	0	Mir219-1
chr17:37079995-37084931	0.14	0	0.08	0.01	0	0	Rnf39
chrX:150544175-150555228	0.14	0	0	0.01	0	0	4921511M17Rik
chr17:37123799-37126449	0.14	0	0.08	0	0	0	H2-M5
chr2:176266768-176283149	0.14	0	0.36	0	0.5	0.32	Gm14430
chr2:176266769-176280240	0.14	0	0.36	0	0.52	0.33	Gm14308
chr7:149482281-149482974	0.14	0	0.51	0	0.64	0.32	Krtap5-1
chr4:73547809-73551857	0.13	0.38	0	0.1	0.07	0.48	Gm13871
chr4:73547810-73551857	0.13	0.38	0	0.1	0.07	0.48	Gm11757
chr4:73547814-73551857	0.13	0.38	0	0.1	0.07	0.48	Gm11758
chr15:82219583-82224452	0.13	0.34	0.65	0	0.31	0.73	Cyp2d11
chrX:35083503-35087784	0.13	0.25	0	0.02	0.04	0.2	Rhox2h
chr7:20779058-20779982	0.13	0.08	0	0	0	0	Vmn1r143
chr15:12737931-12754412	0.13	0.06	0	0.19	0.09	0.04	6030458C11Rik
chr6:69276930-69277168	0.13	0.05	0.02	0	0.53	0.27	Rprl1
chr7:10512972-10538934	0.13	0.04	0.37	0	0.6	0.54	Vmn2r48
chr4:143796664-143802920	0.13	0.03	0.63	0.21	0.31	0.21	C87977
chr17:6438149-6450142	0.13	0.02	0.29	0.23	0.87	0.26	Tmem181b-ps
chr17:38285534-38286473	0.13	0.01	0.14	0.01	0.06	0.1	Olfr133
chr7:8954256-8972357	0.13	0	0.27	0.56	0.29	0.73	Vmn2r37
chr10:78417951-78418884	0.13	0	0.09	0.25	0	0.31	Olfr8
chr6:133479206-133482780	0.13	0	0.18	0.25	0.33	0.22	Gm5885
chr17:13289525-13291338	0.13	0	0.3	0.22	0.07	0.48	Gm11166
chr7:149360436-149361910	0.13	0	0.15	0.16	0	0.19	Krtap5-2
chr17:38191543-38196729	0.13	0	0.57	0.13	0	0.76	Olfr129
chr4:118426199-118427141	0.13	0	0.35	0.13	0	0.36	Olfr1338
chr7:110818616-110819543	0.13	0	0.53	0.1	0.16	0.41	Olfr624
chr10:99798309-99799223	0.13	0	0.64	0.09	0.24	0.61	Gm4301
chr2:26523193-26526802	0.13	0	0.33	0.08	0.11	0.37	Lcn4
chr6:129716664-129725867	0.13	0	0	0.08	0	0	Gm156
chr10:21993279-22008654	0.13	0	0	0.01	0.37	0.13	H60b
chr14:26942094-26949271	0.13	0	0.38	0	0.17	0.18	Gm10391
chr2:175737074-175750551	0.13	0	0.34	0	0.51	0.4	Gm14308
chr14:45336841-45344662	0.12	0.41	0.09	0	0	0.19	Gm8267
chr14:20413359-20421809	0.12	0.35	0.84	0	0.34	0.66	Gm5458
chr19:3153798-3197703	0.12	0.34	0.48	0	0	0	1700030N03Rik
chr7:111681472-111683875	0.12	0.28	0.99	0.21	0.98	0.52	Trim30e-ps1
chr6:66726215-66727124	0.12	0.25	0.08	0	0.01	0.04	Vmn1r38
chr8:22083372-22084427	0.12	0.24	0.74	0	0.62	0.44	AY761185
chr5:147293518-147296278	0.12	0.19	0.55	0	0.73	0.57	Gm6408
chrX:24051433-24077886	0.12	0.08	0.35	0.17	0.38	0.31	Gm5934
chr7:24035780-24036701	0.12	0.07	0	0	0	0	Gm4172
chr7:22812995-22813916	0.12	0.04	0	0	0	0	Gm4172
chr2:86253265-86254207	0.12	0.03	0	0	0	0	Olfr1061
chr11:73934792-73935740	0.12	0.01	0	0.05	0.1	0	Olfr401
chr8:22427087-22428056	0.12	0	0.71	0.17	0.54	0.67	Defa3
chr13:50696340-50696449	0.12	0	0	0.16	0.12	0	Mir683-1
chr15:76875705-76887538	0.12	0	0.04	0.13	0.09	0	Apol6
chrX:64082376-64082455	0.12	0	0.21	0.09	0.44	0.18	Mir465b-1
chr11:21394732-21411183	0.12	0	0.06	0.08	0.25	0.13	4932414J04Rik
chr9:3190268-3199813	0.12	0	0.34	0.06	0.42	0.41	4930433N12Rik
chr2:175197962-175210780	0.12	0	0.31	0.05	0.6	0.35	Gm14431
chr9:37800076-37801024	0.12	0	0.13	0.04	0	0.09	Olfr881
chr7:111712665-111713726	0.12	0	0	0.02	0	0	Olfr652
chr9:35656129-35657465	0.12	0	0	0.02	0.48	0	Gm3428
chr2:175247800-175261277	0.12	0	0.32	0	0.27	0.29	Gm14308
chr2:175737073-175753460	0.12	0	0.36	0	0.55	0.42	0610010B08Rik
chr6:130099123-130110766	0.12	0	0.05	0	0	0	Klra14
chr7:34806585-34807900	0.12	0	0	0	0	0	Scgb1b27
chr11:3024023-3031947	0.11	0.81	0.81	0.8	0.75	0	Pisd-ps1
chr11:3024029-3031945	0.11	0.81	0.81	0.8	0.75	0	Pisd-ps3
chr14:7915538-7937971	0.11	0.62	0.95	0.27	0.48	0.02	Gm3696
chr2:122292318-122293533	0.11	0.51	0.42	0.35	0.32	0	Bambi-ps1
chr14:10716608-10719382	0.11	0.4	0	0	0.02	0.18	Gm3833
chr14:3188283-3196683	0.11	0.28	0.89	0	0.65	0.61	Gm5795
chr7:93812173-93813184	0.11	0.2	0.14	0	0	0	Olfr293
chr7:54590244-54609610	0.11	0.17	0.39	0	0	0	Mrgpra1
chr7:21119185-21120109	0.11	0.1	0	0	0	0	Vmn1r104
chr7:23307985-23308909	0.11	0.07	0	0	0	0	Vmn1r104
chr7:22974395-22975319	0.11	0.05	0.19	0	0	0	Vmn1r143
chrX:5044021-5046383	0.11	0.02	0.19	0	0.29	0.26	Mycs
chr7:113010294-113011841	0.11	0	0.12	0.2	0.91	0.55	Gm15645
chr7:110686774-110687746	0.11	0	0.25	0.17	0.51	0.17	Olfr612
chr5:95611642-95624361	0.11	0	0.47	0.11	0.01	0.53	AU018829
chr19:39361574-39405203	0.11	0	0.26	0.1	0.03	0.2	Cyp2c29
chr4:145427121-145427895	0.11	0	0	0.1	0	0	Gm13238
chr2:175690012-175702830	0.11	0	0.25	0.09	0.59	0.31	Gm14431
chrX:132029126-132039133	0.11	0	0.25	0.05	0.33	0.25	AV320801
chrX:150436132-150447183	0.11	0	0.03	0.05	0	0	4921511M17Rik
chrX:150436132-150447185	0.11	0	0.03	0.05	0	0	Gm10057
chr14:27022851-27026016	0.11	0	0.08	0.03	0	0.01	Gm9746
chr17:19499098-19531554	0.11	0	0.1	0	0	0	Vmn2r99
chr17:8118864-8127762	0.11	0	0.07	0	0	0	Tagap
chr7:9866726-9882971	0.1	0.55	0	0.31	0.3	0.73	Vmn2r43
chrX:32129796-32131700	0.1	0.53	0	0.6	0.13	0.48	Mgclh
chrX:52683411-52700069	0.1	0.48	0	0.45	0	0.33	Gm14625
chrX:34789913-34798973	0.1	0.44	0.5	0.43	0.1	0.67	Rhox3a
chr9:89094110-89102676	0.1	0.37	0.46	0.07	0.27	0.15	Bcl2a1b
chr15:76875504-76882781	0.1	0.11	0.01	0.15	0.08	0	Apol6
chr4:88058833-88084830	0.1	0.09	0.06	0	0	0	Ptplad2
chr17:53863075-53865058	0.1	0.08	0	0.02	0.06	0.02	4932415M13Rik
chr2:88114265-88115204	0.1	0.07	0	0	0	0	Olfr1173
chr7:23476415-23477336	0.1	0.07	0.04	0	0	0	Gm8693
chr7:21094965-21095883	0.1	0.06	0	0	0	0	Vmn1r103
chr7:21287647-21288568	0.1	0.03	0	0	0	0	Gm8693
chrX:10892283-10892601	0.1	0	0.14	0.44	0.49	0.11	Gm14475
chr11:73299388-73300324	0.1	0	0.42	0.22	0.61	0.26	Olfr381
chr15:12749658-12754412	0.1	0	0	0.19	0.1	0	6030458C11Rik
chr13:62618156-62659959	0.1	0	0	0.15	0.08	0	Zfp934
chr19:34658018-34663472	0.1	0	0.03	0.15	0	0.09	Ifit3
chr2:89449245-89450310	0.1	0	0.02	0.15	0	0.11	Olfr1247
chr3:64192542-64213979	0.1	0	0	0.11	0.05	0	Vmn2r4
chr5:95611653-95623508	0.1	0	0.47	0.1	0.01	0.54	Gm16367
chr13:27186057-27192129	0.1	0	0.21	0.07	0	0.08	Prl3d1
chr17:37932390-37933320	0.1	0	0	0.03	0.14	0	Olfr123
chr15:79908210-79913836	0.1	0	0.66	0.02	0.82	0.85	Rpl3
chr1:87473474-87500466	0.1	0	0.2	0	0.37	0.05	Sp110
chr2:175150243-175163712	0.1	0	0.29	0	0.34	0.32	Gm14308
chr7:150851711-150871777	0.09	0.66	0.5	0.03	0	0	Tnfrsf23
chrX:34868165-34872882	0.09	0.34	0	0.11	0.1	0.29	Rhox2c
chrX:34784986-34831309	0.09	0.33	0.18	0.45	0	0.49	Rhox2e
chr7:10092186-10116991	0.09	0.27	0	0.02	0.21	0.58	Vmn2r47
chr11:82930346-82936161	0.09	0.19	0.69	0	0.68	0.8	Slfn1
chr7:111477984-111485131	0.09	0.16	0.39	0	0	0	Trim34b
chr2:89257650-89258568	0.09	0.13	0	0	0.11	0.12	Olfr1239
chr7:147787238-147797023	0.09	0.13	0	0	0	0	Olfr46
chrX:10892214-10892723	0.09	0.08	0.47	0.34	0.62	0.25	Gm14482
chr7:67019267-67019357	0.09	0.08	0.88	0	0.76	0.81	Snord116
chrX:35252273-35254947	0.09	0.08	0.27	0	0.55	0.55	Rhox9
chrX:3546313-3547091	0.09	0.03	0.21	0	0.41	0.43	Gm14354
chr11:116613480-116619197	0.09	0.02	0	0.23	0.08	0.04	BC018473
chr7:111728137-111729183	0.09	0.02	0.28	0	0	0	Olfr653
chr7:152439827-152469832	0.09	0.02	0.15	0	0.2	0.09	Tpcn2
chr11:100107405-100110216	0.09	0	0	0.21	0.04	0.06	Krt16
chr12:89414032-89420338	0.09	0	0	0.17	0.06	0.05	Gm10436
chr2:10424899-10424982	0.09	0	0.72	0.15	0.21	0.76	Mir467a-10
chr2:10424906-10424977	0.09	0	0.72	0.15	0.21	0.76	Mir467a-1
chr3:15695146-15748487	0.09	0	0	0.13	0	0	LOC100038947
chr1:175603810-175628523	0.09	0	0.47	0.12	0.18	0.52	Pydc3
chr17:18718690-18735121	0.09	0	0.09	0.12	0	0.15	Vmn2r96
chr9:109280922-109306808	0.09	0	0.06	0.11	0	0.29	Fbxw22
chr10:99829132-99830046	0.09	0	0.59	0.1	0.09	0.55	Gm4301
chr7:51471844-51476073	0.09	0	0	0.07	0.05	0	Klk1b5
chr5:95294540-95307276	0.09	0	0.48	0.05	0.12	0.47	AU018829
chr13:22648069-22648978	0.09	0	0	0.04	0.08	0	Vmn1r204
chr13:62862098-62862206	0.09	0	0.3	0.02	0	0.18	Mir713
chrX:8031468-8038852	0.09	0	0	0.02	0	0	Ssxb2
chr10:129411660-129412605	0.09	0	0	0	0.18	0	Olfr247
chr11:58394338-58395379	0.09	0	0.4	0	0.02	0.01	Olfr325
chr17:34118436-34122303	0.09	0	0.85	0	0.49	0.56	AA388235
chr7:20723471-20724437	0.09	0	0.43	0	0	0.13	Gm10666
chr7:68880422-68880488	0.09	0	0	0	0.02	0	Mir344e
chr17:30763880-31012209	0.08	0.59	0.51	0.35	0	0.27	Dnahc8
chrX:136424049-136533134	0.08	0.4	0.4	0.13	0.02	0.44	Rbm41
chr7:15974199-15983892	0.08	0.4	0	0.11	0.03	0.25	Obox2
chr2:90105667-90106585	0.08	0.29	0	0	0	0	Olfr1271
chr7:7184037-7200039	0.08	0.19	0.12	0.69	0	0.86	Vmn2r29
chr9:88475873-88483657	0.08	0.19	0.2	0.48	0.43	0	Trim43a
chr7:24391193-24392108	0.08	0.17	0.02	0	0	0.07	Vmn1r170
chr6:123335279-123368079	0.08	0.12	0	0	0.04	0.07	Vmn2r20
chr6:85710624-85712474	0.08	0.11	0.93	0.25	0.57	0.8	Cml3
chr4:144203609-144213301	0.08	0.09	0	0.02	0.02	0	Gm13177
chr10:22122618-22127276	0.08	0.02	0	0	0.33	0.32	Gm10825
chr13:12883082-12892325	0.08	0	0.08	0.38	0.54	0.2	Prl2c4
chr13:12883087-12892346	0.08	0	0.08	0.38	0.54	0.2	Prl2c3
chr7:49864895-49897974	0.08	0	0.36	0.11	0.14	0.19	9830147E19Rik
chrX:131702162-131712171	0.08	0	0.34	0.11	0.42	0.33	AV320801
chrX:7904549-7913361	0.08	0	0.73	0.11	0.71	0.74	Ssxb10
chr7:5146517-5148349	0.08	0	0	0.09	0	0.01	Vmn1r56
chr14:3740222-3748663	0.08	0	0.21	0.05	0.68	0.65	Gm10413
chr5:95294551-95306423	0.08	0	0.46	0.05	0.1	0.46	Gm16367
chr14:3500819-3509260	0.08	0	0.29	0.03	0.74	0.76	Gm10413
chr17:37229878-37230817	0.08	0	0.17	0.03	0.27	0.18	Olfr91
chr7:23840558-23841482	0.08	0	0	0.03	0	0	Vmn1r135
chrX:50911098-50912311	0.08	0	0.02	0.02	0.23	0.11	Cxx1c
chr2:175147334-175163713	0.08	0	0.3	0	0.34	0.32	Gm14430
chr2:175639523-175652992	0.08	0	0.28	0	0.38	0.32	Gm14308
chr2:90162378-90165283	0.08	0	0.27	0	0.07	0.15	Gm13769
chr7:20790032-20790956	0.08	0	0.12	0	0	0	Gm6164
chr7:22085520-22086486	0.08	0	0	0	0	0	Vmn1r126
chr7:22085544-22086486	0.08	0	0	0	0	0	Gm4175
chr7:5405428-5406361	0.08	0	0	0	0	0	Vmn1r59
chr17:3064317-3084183	0.07	0.84	0.84	0.81	0.72	0.13	Pisd-ps2
chr7:9744079-9759858	0.07	0.68	0.44	0.31	0.49	0.94	Vmn2r44
chrX:5246184-5248144	0.07	0.65	0	0.71	0.1	0.58	Gm14374
chr8:22341282-22342125	0.07	0.39	0.67	0.51	0.34	0.71	Gm15293
chr13:22864267-22865194	0.07	0.35	0.84	0.12	0.61	0.17	Vmn1r208
chr4:73518122-73522170	0.07	0.33	0	0.14	0.01	0.44	Gm13871
chr4:73518123-73522170	0.07	0.33	0	0.14	0.01	0.44	Gm11757
chr4:73518127-73522170	0.07	0.33	0	0.14	0.01	0.44	Gm11758
chr7:39047838-39056367	0.07	0.31	0.1	0.36	0	0.25	Pop4
chr9:37868906-37869836	0.07	0.27	0.06	0.09	0	0	Olfr885
chrX:131968373-131978536	0.07	0.24	0	0.48	0	0.04	Gm5128
chr7:11332850-11334887	0.07	0.24	0	0	0	0	Vmn1r71
chr17:34132956-34137278	0.07	0.16	0.79	0	0.94	0.83	H2-K1
chr19:39585311-39643019	0.07	0.13	0.43	0.03	0.01	0	Cyp2c39
chr9:32122367-32151822	0.07	0.09	0	0	0.35	0.64	Kcnj5
chr9:38951686-38952603	0.07	0.08	0.12	0.19	0.21	0	Olfr242
chr17:7159313-7165505	0.07	0.01	0.5	0.2	0.42	0.44	Tagap1
chr12:121184434-121257179	0.07	0.01	0.12	0.01	0	0.34	Tmem196
chr7:7738861-7772578	0.07	0	0	0.36	0.1	0.07	Vmn2r35
chr1:175522087-175529405	0.07	0	0.79	0.23	0.78	0.92	Pydc4
chr7:34063384-34065360	0.07	0	0.02	0.21	0.25	0	Scgb2b19
chr10:21832855-21869076	0.07	0	0	0.19	0.14	0	E030030I06Rik
chr17:13104220-13108957	0.07	0	0	0.16	0.03	0	Mrpl18
chr7:10561593-10577488	0.07	0	0.44	0.16	0.6	0.74	Vmn2r49
chr5:26360809-26366045	0.07	0	0.14	0.13	0.21	0.03	Speer4a
chr4:143243662-143247149	0.07	0	0	0.09	0.04	0	Gm13088
chr7:23804024-23804942	0.07	0	0	0.03	0	0	Gm4177
chr14:27022852-27026094	0.07	0	0.06	0.02	0	0.02	Gm10395
chr17:35400067-35403675	0.07	0	0.64	0	0.58	0.62	H2-L
chr17:35516561-35521619	0.07	0	0	0	0.02	0	H2-Q4
chr17:7183208-7202542	0.07	0	0	0	0.31	0.1	Rnaset2b
chr2:175244891-175261278	0.07	0	0.33	0	0.3	0.32	Gm14430
chr7:16481472-16489379	0.07	0	0.38	0	0.36	0.11	Crxos1
chr7:21003290-21004214	0.07	0	0	0	0	0	Vmn1r100
chr7:22044712-22045636	0.07	0	0	0	0.09	0	Vmn1r124
chr7:22985359-22986283	0.07	0	0.06	0	0	0	Gm6164
chr7:27396137-27397097	0.07	0	0.04	0	0.21	0.26	Vmn1r185
chrX:136476066-136533134	0.06	0.6	0.39	0.15	0.02	0.48	Rbm41
chr11:49283555-49284683	0.06	0.45	0.44	0.21	0.21	0	Olfr1386
chr1:21275326-21288393	0.06	0.34	0.89	0.17	0.43	0.9	Gm4956
chr4:73532973-73537016	0.06	0.33	0.03	0.15	0	0.32	Gm11758
chr4:73532968-73537016	0.06	0.33	0.03	0.14	0	0.32	Gm13871
chr4:73532969-73537016	0.06	0.33	0.03	0.14	0	0.32	Gm11757
chr16:59215510-59216437	0.06	0.26	0	0.44	0	0.28	Olfr199
chr6:121956815-122035985	0.06	0.26	0.28	0.31	0.35	0.12	Mug2
chrX:151383005-151384112	0.06	0.26	0.52	0	0.16	0.42	Magea3
chr18:74019040-74038788	0.06	0.25	0.65	0	0	0.73	Mro
chr5:146666182-146691430	0.06	0.22	0	0.11	0.04	0.32	Cyp3a11
chr6:66502176-66509702	0.06	0.21	0.25	0	0	0	Vmn1r32
chrX:131907822-131917932	0.06	0.16	0	0.17	0	0.06	Gm5128
chr1:85196185-85210337	0.06	0.11	0.2	0.31	0.03	0.33	Gm7609
chr8:22301955-22302928	0.06	0.08	0.16	0	0.31	0.39	Defa22
chr12:56331464-56364007	0.06	0.07	0.15	0.17	0	0.1	Srp54c
chr6:136277556-136280001	0.06	0.07	0.01	0	0	0	Gm8994
chr7:23574877-23575801	0.06	0.07	0	0	0	0	Vmn1r158
chr3:98302995-98314461	0.06	0.06	0	0	0.02	0.01	Gm10681
chr3:98303002-98314490	0.06	0.06	0	0	0.02	0.01	Hsd3b4
chr17:24054424-24056408	0.06	0.04	0.73	0	0.65	0.61	Dcpp3
chr7:23318982-23319906	0.06	0.04	0	0	0	0	Gm5726
chrX:150478528-150489582	0.06	0.04	0	0	0	0	4921511M17Rik
chrX:150478528-150489584	0.06	0.04	0	0	0	0	Gm10057
chr15:79908932-79909009	0.06	0.03	0.22	0	0.4	0.47	Snord83b
chr8:36528318-36558587	0.06	0	0	0.49	0.84	0.82	Eri1
chr2:86285169-86286161	0.06	0	0.01	0.21	0	0.14	Olfr1065
chr12:89192923-89199120	0.06	0	0	0.2	0.2	0.06	Oog1
chr12:89192923-89199126	0.06	0	0	0.2	0.2	0.06	Gm2042
chr15:98143019-98143979	0.06	0	0.13	0.18	0	0.33	Olfr257
chr9:37950721-37951666	0.06	0	0.17	0.14	0.27	0.04	Olfr890
chr17:95214078-95233760	0.06	0	0.91	0.13	0.74	0.93	2610044O15Rik8
chr2:86262875-86263831	0.06	0	0.12	0.13	0	0.33	Olfr1062
chr11:49257354-49258290	0.06	0	0	0.12	0	0	Olfr1388
chr12:112779156-112779277	0.06	0	0	0.1	0.03	0	Snora28
chr5:26441303-26447965	0.06	0	0	0.1	0.02	0	Gm10220
chr8:107355543-107362552	0.06	0	0	0.08	0.03	0	Ces2b
chr3:105950471-105970482	0.06	0	0.46	0.06	0.43	0.18	Chi3l3
chrX:99986534-99993728	0.06	0	0.38	0.06	0.37	0.38	Gm5166
chr14:44680551-44681022	0.06	0	0.12	0.05	0.06	0.11	Ear12
chr14:6956219-6964661	0.06	0	0.24	0.03	0.68	0.71	Gm10413
chr1:175204591-175207887	0.06	0	0.3	0	0	0.09	Gm11062
chr10:22081699-22093945	0.06	0	0.36	0	0.67	0.53	Raet1d
chr13:22974956-22976030	0.06	0	0	0	0	0	Vmn1r212
chr17:6310544-6317474	0.06	0	0.11	0	0.18	0.04	Dynlt1a
chr2:175639522-175655901	0.06	0	0.3	0	0.44	0.3	0610010B08Rik
chr2:175964487-175977956	0.06	0	0.27	0	0.34	0.29	Gm14308
chr5:146319532-146345599	0.05	0.67	0.61	0.3	0.25	0	Cyp3a41a
chrX:144615266-144659253	0.05	0.37	0.35	0.17	0.11	0	Gm15107
chrX:10895411-10895853	0.05	0.31	0.51	0.12	0.44	0.28	Gm14478
chr14:3049284-3076838	0.05	0.23	0.08	0	0	0.04	Gm2897
chr14:3049307-3077025	0.05	0.23	0.08	0	0	0.04	LOC100861615
chr5:95939760-95951421	0.05	0.22	0	0.03	0	0.17	Gm3286
chr17:36392617-36394791	0.05	0.21	0.09	0.03	0.17	0.23	Rpp21
chrX:30823249-30824027	0.05	0.21	0.19	0	0.38	0.59	LOC100862314
chr7:53995868-53998350	0.05	0.19	0	0.04	0.08	0.17	Saa1
chr11:101303558-101306910	0.05	0.1	0.06	0.01	0	0	Rpl27
chr7:9638310-9655801	0.05	0.09	0.41	0.34	0.09	0.98	Vmn2r45
chr17:34946036-34960399	0.05	0.09	0.11	0	0.06	0.08	C4a
chr7:111127689-111128655	0.05	0.06	0.4	0.3	0.59	0.09	Olfr635
chr12:56256326-56365681	0.05	0.06	0	0.19	0.02	0.08	Srp54a
chr3:98303002-98314395	0.05	0.06	0	0	0.02	0.01	Hsd3b4
chrX:70479414-70488469	0.05	0.06	0.25	0	0.52	0.63	Xlr4c
chr7:20818256-20819177	0.05	0.03	0	0	0	0	Gm4498
chr7:22330188-22331109	0.05	0.03	0	0	0	0	Gm4172
chr13:12706332-12742662	0.05	0	0.12	0.26	0	0.19	Gpr137b-ps
chr10:21893326-21903720	0.05	0	0.1	0.14	0.46	0.27	Raet1e
chr7:54719176-54744952	0.05	0	0.73	0.13	0.59	0.95	Mrgpra2b
chr4:61808865-61811875	0.05	0	0	0.11	0.15	0	Mup21
chr14:26882536-26886911	0.05	0	0.01	0.1	0	0.04	D14Ertd449e
chr7:22617369-22618293	0.05	0	0	0.08	0	0	Vmn1r135
chr16:15848533-15863415	0.05	0	0.01	0.06	0.01	0.09	Mzt2
chr16:59035605-59039575	0.05	0	0.26	0.05	0	0.19	Olfr187
chr14:26762025-26775856	0.05	0	0	0.04	0.01	0	Gm2104
chr14:26762029-26775851	0.05	0	0	0.04	0.01	0	Cphx
chr2:37075010-37075940	0.05	0	0.08	0.03	0.18	0.26	Olfr366
chr2:87577543-87578479	0.05	0	0.33	0.02	0.13	0.44	Olfr1138
chr7:22545549-22546494	0.05	0	0	0.02	0	0	Gm4175
chr17:35400038-35404442	0.05	0	0.67	0	0.6	0.59	H2-D1
chr3:64294742-64311607	0.05	0	0	0	0.09	0	Vmn2r5
chr6:116490472-116491456	0.05	0	0	0	0.04	0	Olfr213
chr7:22580829-22581747	0.05	0	0	0	0	0	Gm4177
chr7:22918794-22919760	0.05	0	0.43	0	0	0.14	Gm10666
chr7:23013582-23014503	0.05	0	0	0	0	0	Gm4498
chr7:23768747-23769692	0.05	0	0	0	0	0	Gm4175
chr7:55236163-55237666	0.05	0	0.88	0	0.3	0.27	Mrgpra4
chr9:38480088-38481066	0.05	0	0.25	0	0.21	0.08	Olfr918
chr17:30729806-30749604	0.04	0.68	0.4	0.4	0	0.39	Glo1
chr13:61348107-61356709	0.04	0.46	0.41	0	0	0	Cts8
chrX:10895381-10895890	0.04	0.36	0.52	0.17	0.46	0.28	Gm14482
chr7:7165706-7231000	0.04	0.27	0	0.79	0.29	0.77	Vmn2r29
chr10:51210780-51216417	0.04	0.22	0.6	0	0.24	0.06	Lilrb4
chr4:143484139-143490283	0.04	0.19	0.95	0.25	0.77	0.7	Pramef6
chr7:34158252-34159577	0.04	0.19	0	0	0	0.13	Scgb1b20
chr3:159262144-159288271	0.04	0.16	0.1	0.2	0.12	0	Rpe65
chr10:21786114-21787885	0.04	0.15	0.74	0	0.72	0.4	4930444G20Rik
chr9:88979461-88987673	0.04	0.12	0.45	0.29	0.44	0.62	Trim43b
chr14:44020916-44026344	0.04	0.12	0.11	0	0.42	0.42	1700001F09Rik
chrX:145098146-145138392	0.04	0.08	0.09	0	0	0	Gm15127
chr7:110990151-110991676	0.04	0.07	0.66	0	0.55	0.72	Hbb-bh1
chr10:129382159-129383116	0.04	0.06	0.1	0.14	0.35	0	Olfr818
chr11:114903444-114909609	0.04	0.06	0.68	0	0.7	0.44	Cd300lh
chr7:21130182-21131106	0.04	0.05	0	0	0	0	Gm5726
chrX:51834384-51851190	0.04	0.03	0.28	0.17	0.42	0.04	Gm16405
chr1:175892699-175912975	0.04	0.01	0.37	0	0.41	0.48	Ifi202b
chr7:23198601-23199525	0.04	0.01	0	0	0	0	Vmn1r100
chr12:88943614-88949795	0.04	0	0.11	0.37	0.58	0.36	Oog1
chr10:77261131-77261878	0.04	0	0	0.19	0.12	0	Gm19668
chr8:22056168-22061750	0.04	0	0	0.13	0.08	0	Gm6040
chr14:26882536-26886489	0.04	0	0	0.08	0	0.01	D14Ertd449e
chr16:10835151-10843328	0.04	0	0	0.07	0.03	0	Rmi2
chr5:23216793-23216894	0.04	0	0.56	0.06	0.67	0.79	Mir3096
chr7:147387710-147388667	0.04	0	0.41	0.06	0	0.61	Olfr524
chr7:27220131-27260477	0.04	0	0	0.06	0.01	0.1	Nlrp4a
chr10:129348393-129349332	0.04	0	0.16	0.04	0.03	0.06	Olfr816
chr7:12806664-12811156	0.04	0	0.19	0.04	0	0.18	Gm4224
chr7:34796950-34798961	0.04	0	0	0.04	0	0.01	Scgb2b27
chr17:33313360-33314308	0.04	0	0.09	0.03	0.19	0	Olfr55
chr17:34162977-34165000	0.04	0	0	0.02	0.14	0.03	H2-Ke6
chr5:116858503-116872873	0.04	0	0	0.01	0.04	0	Hspb8
chr6:133242233-133245808	0.04	0	0	0.01	0.02	0	5530400C23Rik
chr7:5098091-5099024	0.04	0	0.02	0.01	0	0	Vmn1r55
chrX:7944103-7952514	0.04	0	0.73	0.01	0.65	0.72	Ssxb9
chr10:128448342-128449272	0.04	0	0	0	0	0	Olfr763
chr10:128824690-128825650	0.04	0	0	0	0	0	Olfr784
chr10:99803471-99804396	0.04	0	0.65	0	0.26	0.74	Gm4303
chr11:68715067-68718036	0.04	0	0.8	0	0.63	0.78	Rpl26
chr11:68715090-68718036	0.04	0	0.8	0	0.63	0.78	Gm15772
chr17:17201066-17226595	0.04	0	0.54	0	0.32	0.24	Zfp960
chr6:128921177-128934725	0.04	0	0.11	0	0.38	0.28	Clec2g
chr7:21596239-21597205	0.04	0	0	0	0	0	Vmn1r114
chr8:22776268-22776440	0.04	0	0.19	0	0.41	0.38	Defa4
chr7:39303157-39313212	0.03	0.36	0.02	0.04	0.07	0.33	Gm5591
chr14:90296030-90299254	0.03	0.34	0.48	0.21	0.22	0.01	Gm5088
chr16:48842664-48844574	0.03	0.27	0.16	0.03	0.24	0.31	Retnla
chr7:3835813-3849694	0.03	0.21	0.31	0	0.11	0	Gm14548
chr7:21696445-21697366	0.03	0.2	0	0.02	0	0	Gm4498
chr17:36175353-36179637	0.03	0.15	0.14	0	0.45	0.56	H2-T9
chr17:36175353-36179647	0.03	0.15	0.14	0	0.45	0.56	H2-T22
chr14:45119792-45126016	0.03	0.14	0.78	0.18	0.37	0.24	BC061237
chr5:95417718-95455565	0.03	0.13	0.24	0	0.36	0.53	Gm6367
chr6:47635201-47635375	0.03	0.11	0.51	0	0.12	0.1	Rn4.5s
chr12:56256090-56290200	0.03	0.08	0	0.21	0	0.15	Srp54b
chr7:21027018-21027942	0.03	0.08	0	0.03	0	0	Vmn1r101
chr11:101280127-101286647	0.03	0.06	0.03	0	0	0	Ptges3l
chr7:50432957-50447479	0.03	0.05	0.21	0.13	0.07	0	Zfp936
chr7:23917641-23929497	0.03	0.05	0	0	0	0	Gm10662
chr7:23917641-23929499	0.03	0.05	0	0	0	0	Gm5891
chr3:98356465-98367932	0.03	0.03	0	0	0.18	0.03	Gm10681
chr3:98356473-98367866	0.03	0.03	0	0	0.19	0.03	Hsd3b4
chr3:98356473-98367961	0.03	0.03	0	0	0.18	0.03	Hsd3b4
chr7:15050507-15078275	0.03	0.03	0	0	0.02	0.03	Sult2a7
chr12:11889001-11889705	0.03	0.02	0.01	0	0	0	Tubb2a-ps2
chr4:73281698-73288074	0.03	0.01	0.57	0.1	0	0.84	LOC100502924
chr7:23197249-23199687	0.03	0.01	0	0	0	0	Vmn1r148
chrX:64088938-64089017	0.03	0	0.26	0.09	0.5	0.26	Mir465b-1
chr4:113150495-113672108	0.03	0	0.56	0.08	0.63	0.52	Skint5
chr3:107766613-107772092	0.03	0	0	0.05	0	0.04	Gstm3
chr14:27022152-27026105	0.03	0	0	0.03	0	0	D14Ertd449e
chr2:86861766-86862699	0.03	0	0	0.02	0.03	0	Olfr1104
chrX:166317553-166428729	0.03	0	0.08	0.02	0.64	0.04	Mid1
chr11:99659499-99671206	0.03	0	0.41	0.01	0.1	0.28	Gm11554
chr14:26901778-26915613	0.03	0	0	0.01	0	0	Gm2104
chr14:26901782-26915608	0.03	0	0	0.01	0	0	Cphx
chr2:89958823-89959753	0.03	0	0	0	0	0	Olfr1269
chr2:90061723-90064628	0.03	0	0.32	0	0.13	0.25	Gm13769
chr5:23763345-23763430	0.03	0	0.02	0	0.2	0.17	Mir684-1
chr6:85657166-85657852	0.03	0	0.93	0	0.65	0.68	Gm4477
chr7:147404165-147417044	0.03	0	0.18	0	0	0.19	Cd163l1
chr7:22145386-22146310	0.03	0	0	0	0	0	Vmn1r129
chr8:107899280-107906762	0.03	0	0.01	0	0.06	0.15	Plekhg4
chr5:146505623-146531712	0.02	0.62	0.58	0.23	0.24	0.25	Cyp3a41a
chrX:34805369-34810130	0.02	0.36	0	0.45	0	0.38	Rhox4a
chr11:48851161-48864744	0.02	0.25	0.27	0.21	0.47	0	9930111J21Rik2
chr14:6451733-6458384	0.02	0.25	0.9	0	0.69	0.78	Gm3317
chrX:10895450-10895768	0.02	0.23	0.44	0.08	0.38	0.22	Gm14475
chrX:145522857-145739546	0.02	0.23	0.33	0.02	0.02	0	Gm15085
chr8:22675857-22676816	0.02	0.22	0.08	0.45	0.14	0.38	LOC100862126
chr8:22675857-22676822	0.02	0.22	0.08	0.45	0.15	0.38	Gm14850
chrX:144749072-144955989	0.02	0.22	0.28	0.01	0	0	Gm15085
chr6:89985926-89986835	0.02	0.17	0.21	0.26	0	0.26	Vmn1r48
chr8:28454865-28459660	0.02	0.13	0	0.43	0.14	0.18	Tex24
chr7:5959351-5962612	0.02	0.06	0	0.07	0.01	0.05	Vmn1r65
chr7:24002350-24003274	0.02	0.05	0	0	0	0.01	Vmn1r107
chr1:135223788-135226299	0.02	0.04	0.12	0	0.06	0	Kiss1
chr8:36650851-36742503	0.02	0.03	0	0	0.73	0.91	Mfhas1
chr4:101613011-101615788	0.02	0	0	0.32	0.3	0	Gm12794
chr4:61492352-61496214	0.02	0	0	0.11	0	0.07	Mup5
chr7:32075537-32076835	0.02	0	0.01	0.07	0	0.08	Scgb1b2
chr7:117189877-117190061	0.02	0	0	0.06	0.01	0	Snora23
chrX:166412974-166416849	0.02	0	0	0.05	0.43	0	G530011O06Rik
chr2:90092225-90093143	0.02	0	0	0.04	0	0	Olfr142
chr4:121087339-121095704	0.02	0	0.34	0.03	0.71	0.47	Gm12886
chr19:13239505-13240444	0.02	0	0	0.02	0.06	0	Olfr1461
chr4:62170203-62181097	0.02	0	0.01	0.02	0	0.02	Alad
chr7:10622583-10638527	0.02	0	0.36	0.02	0.7	0.68	Vmn2r50
chr7:27450245-27471449	0.02	0	0	0.01	0	0	Cyp2b23
chr7:27542205-27557649	0.02	0	0	0.01	0	0	Cyp2b19
chr10:129470683-129471616	0.02	0	0.16	0	0.01	0.02	Olfr821
chr13:50562675-50570724	0.02	0	0.27	0	0	0.19	Gm806
chr2:36543523-36544453	0.02	0	0.44	0	0.18	0.4	Olfr346
chr9:39801396-39802332	0.02	0	0	0	0.08	0.03	Olfr978
chr17:30759385-30763850	0.01	0.61	0.25	0.42	0	0.35	1700097N02Rik
chr14:59895749-59916359	0.01	0.44	0	0.3	0.18	0.64	Phf11
chr4:60079340-60152730	0.01	0.29	0.77	0.34	0.73	0	Mup15
chrX:34971918-34976789	0.01	0.28	0.06	0.1	0.18	0.36	Rhox4e
chr2:36308106-36309045	0.01	0.25	0.33	0	0.42	0.66	Olfr340
chr5:95885824-95914608	0.01	0.22	0	0.05	0.15	0.42	D5Ertd577e
chr14:5266666-5273317	0.01	0.17	0.9	0	0.67	0.7	Gm3317
chr4:143204905-143208498	0.01	0.16	0.84	0.19	0.55	0.39	Gm13083
chrX:72212182-72214464	0.01	0.14	0.3	0.07	0	0.38	LOC100503280
chr11:68735336-68740583	0.01	0.14	0.61	0.04	0.73	0.57	Odf4
chr17:7555252-7557045	0.01	0.11	0	0	0	0	Ttll2
chr7:23443036-23443960	0.01	0.08	0	0	0	0	Vmn1r107
chr7:22694452-22706308	0.01	0.06	0	0	0	0	Gm10662
chr7:22694452-22706310	0.01	0.06	0	0	0	0	Gm5891
chr9:38137076-38138144	0.01	0.06	0	0	0.04	0.05	Olfr25
chr7:22296798-22297722	0.01	0.05	0	0	0	0	Vmn1r107
chr2:168056121-168057803	0.01	0.04	0.04	0	0	0	Mocs3
chr13:120217713-120249127	0.01	0.03	0.12	0	0	0.03	Paip1
chrX:51925387-51942193	0.01	0.02	0.3	0.13	0.42	0.06	Gm16405
chr12:88959817-88963905	0.01	0	0.06	0.41	0.5	0.15	BB287469
chr2:151127774-151141739	0.01	0	0	0.13	0	0.07	4930442J19Rik
chr17:23427900-23449280	0.01	0	0.35	0.09	0.36	0.29	Vmn2r114
chr7:21629116-21630004	0.01	0	0	0.06	0	0	Vmn1r115
chr15:77338700-77347749	0.01	0	0	0.03	0.18	0	Apol11a
chr14:27022851-27026511	0.01	0	0.1	0.02	0	0.1	Gm9746
chr7:32488797-32490773	0.01	0	0.34	0.02	0.14	0.3	Scgb2b7
chr10:103614078-103616518	0.01	0	0.11	0.01	0.35	0.02	Gm6763
chr7:27320083-27359165	0.01	0	0.12	0.01	0	0.16	Nlrp9a
chr10:103614078-103616547	0.01	0	0.12	0	0.36	0.02	LOC100861901
chr12:9036802-9043200	0.01	0	0.14	0	0.5	0.6	Ttc32
chr14:26883235-26886895	0.01	0	0	0	0	0	Gm9746
chr14:26883236-26886911	0.01	0	0	0	0	0	Gm10395
chr6:57958176-57959196	0.01	0	0	0	0	0	Vmn1r26
chr6:85758044-85759871	0.01	0	0	0	0	0	Gm11128
chr7:114179649-114180624	0.01	0	0.93	0	0.93	0.94	Olfr713
chr7:18933550-18940342	0.01	0	0.25	0	0.05	0.3	Psg18
chr7:22628362-22629286	0.01	0	0	0	0	0	Gm5725
chr7:34149361-34151338	0.01	0	0	0	0.22	0.16	Scgb2b20
chr8:37157881-37210841	0.01	0	0	0	0.88	0.93	D8Ertd82e
chr9:21092907-21095653	0.01	0	0	0	0.05	0	Cdkn2d
chr9:37833392-37834322	0.01	0	0.11	0	0.15	0.35	Olfr883
chr10:117726685-117732094	0	0.88	0.99	0.84	0.96	0.33	Iltifb
chr11:3031852-3093466	0	0.85	0.83	0.82	0.76	0.16	Sfi1
chrX:10898617-10898935	0	0.8	0.42	0.46	0.32	0	Gm14475
chrX:10898578-10899020	0	0.76	0.39	0.45	0.29	0	Gm14478
chr11:83037077-83040086	0	0.76	0.73	0.26	0.23	0.33	AI662270
chrX:10898548-10899057	0	0.74	0.38	0.47	0.28	0	Gm14482
chr18:90679545-90712659	0	0.68	0.29	0.17	0.01	0.19	Tmx3
chrX:8610611-8611459	0	0.67	0.74	0.51	0.72	0.89	Fthl17
chr4:143436399-143443540	0	0.67	0.77	0.32	0.28	0.03	Gm13103
chr7:67011675-67011765	0	0.66	0.6	0.38	0.31	0.88	Snord116
chr7:7416679-7432684	0	0.59	0.02	0.7	0.52	0.8	Vmn2r32
chrX:34794872-34798793	0	0.59	0.34	0.42	0.06	0.67	Rhox3e
chrX:10901784-10902102	0	0.59	0.6	0.4	0.52	0.23	Gm14475
chrX:35563617-35563697	0	0.59	0.83	0.35	0.49	0.06	Mir3110
chrX:10876382-10876883	0	0.55	0	0.46	0	0	Gm14483
chr7:7336695-7352338	0	0.54	0.06	0.58	0	0.76	Vmn2r31
chr17:31038811-31073455	0	0.53	0	0.43	0.01	0.44	Glp1r
chrX:52804772-52821634	0	0.52	0	0.5	0	0.25	Gm16404
chrX:10876446-10876764	0	0.51	0	0.47	0	0.02	Gm14475
chr14:4974180-4978876	0	0.5	0.99	0.43	0.86	0.71	Gm3264
chr2:10407761-10407844	0	0.49	0.9	0.33	0.86	0.87	Mir467a-2
chr2:10407766-10407839	0	0.49	0.91	0.33	0.86	0.87	Mir467a-1
chr2:10410225-10410308	0	0.48	0.84	0.46	0.83	0.72	Mir467a-2
chr2:10410230-10410303	0	0.48	0.84	0.45	0.82	0.72	Mir467a-1
chr2:10415648-10415743	0	0.48	0.84	0.38	0.79	0.65	Mir669a-2
chr2:10415650-10415747	0	0.48	0.84	0.38	0.79	0.65	Mir669a-1
chr2:10415654-10415741	0	0.48	0.84	0.38	0.79	0.65	Mir669a-10
chr13:22817552-22818491	0	0.46	0.91	0.3	0.72	0.18	Vmn1r207-ps
chr2:10418123-10418210	0	0.45	0.92	0.63	0.96	0.83	Mir669p-1
chr9:3038668-3038743	0	0.45	0.42	0.46	0.41	0.02	Mir101c
chr5:96221657-96233254	0	0.45	0.13	0.39	0.12	0.8	Gm3286
chr8:22844965-22845943	0	0.45	0.32	0.28	0.15	0	Defa24
chr9:78137734-78153332	0	0.45	0.22	0	0.03	0.79	Gm10639
chrX:34894843-34899631	0	0.44	0.73	0.46	0.72	0.81	Rhox4c
chr7:12761541-12762462	0	0.44	0.55	0.2	0.37	0.17	Vmn1r79
chr13:67490264-67500703	0	0.43	0.34	0.41	0.18	0.24	Zfp429
chr8:22845008-22845849	0	0.43	0.29	0.25	0.12	0	Defa6
chr6:66628787-66629678	0	0.42	0.13	0.36	0.06	0	Vmn1r35
chr11:73238538-73241979	0	0.42	0	0	0	0.39	Olfr378
chr4:61176624-61180518	0	0.41	0.22	0.45	0.48	0.15	Mup16
chr4:147195885-147196311	0	0.41	0.06	0.44	0	0.45	Rps19-ps3
chr7:39005672-39013013	0	0.41	0.37	0.39	0.49	0.37	Plekhf1
chrX:34929041-34933682	0	0.41	0	0.35	0	0.28	Rhox4d
chr9:19612763-19613693	0	0.4	0.54	0.33	0.4	0.02	Olfr859
chr11:98487673-98499403	0	0.39	0.31	0.09	0.07	0.11	Gsdma3
chr11:48779318-48792900	0	0.37	0.39	0.57	0.86	0.03	9930111J21Rik2
chr14:8156501-8164909	0	0.36	0.47	0.3	0.42	0	Gm5797
chr19:40164168-40188445	0	0.36	0	0.25	0	0.2	Cyp2c50
chr14:4534030-4622491	0	0.36	0.9	0.2	0.83	0.74	Gm3264
chr3:88187748-88188386	0	0.35	0.03	0.46	0.06	0.79	Bglap
chr2:10408273-10408368	0	0.35	0.91	0.29	0.82	0.68	Mir669a-2
chr2:10408275-10408372	0	0.35	0.91	0.29	0.82	0.68	Mir669a-1
chr2:10408279-10408366	0	0.35	0.91	0.29	0.82	0.68	Mir669a-10
chr5:26408711-26415804	0	0.35	0	0.13	0	0.37	Gm10471
chr3:159502658-159598139	0	0.35	0	0.01	0	0	Wls
chr5:96204888-96233249	0	0.34	0.43	0.39	0.23	0.79	E330014E10Rik
chr7:38968805-38982584	0	0.34	0.34	0.34	0.19	0.25	1600014C10Rik
chr12:105185141-105195107	0	0.34	0.3	0.28	0.26	0.58	Serpina1e
chr14:7838628-7859963	0	0.34	0.97	0.22	0.87	0.62	Gm10406
chr7:23627706-23628624	0	0.34	0	0.15	0	0.12	Vmn1r159
chr7:38968235-38982584	0	0.33	0.39	0.34	0.18	0.25	1600014C10Rik
chr17:39777901-39782612	0	0.33	0.33	0.33	0.19	0.02	Gm9041
chr7:67014217-67014307	0	0.32	0.43	0.36	0.5	0.26	Snord116
chr7:11032137-11033136	0	0.32	0	0.29	0	0.17	Vmn1r67
chr2:10402874-10402947	0	0.32	0.19	0.12	0.05	0	Mir467b
chr11:48759651-48792883	0	0.31	0.3	0.5	0.78	0	9930111J21Rik1
chr16:84371387-84375750	0	0.31	0.08	0.4	0.12	0	4930553E22Rik
chr9:19584726-19588508	0	0.31	0.02	0.31	0.05	0	Olfr58
chr7:46511993-46519904	0	0.31	0	0.08	0	0.25	LOC100861861
chr2:10420531-10420626	0	0.29	0.64	0	0.13	0.66	Mir669a-2
chr2:10420533-10420630	0	0.29	0.63	0	0.13	0.66	Mir669a-1
chr2:10420537-10420624	0	0.29	0.64	0	0.13	0.66	Mir669a-10
chrX:24975421-24997578	0	0.29	0.36	0	0.07	0.46	Gm1993
chr2:10415136-10415219	0	0.28	0.71	0.53	0.88	0.53	Mir467a-2
chr6:47702750-47702924	0	0.28	0.63	0.32	0.59	0.59	Rn4.5s
chr1:85084713-85106428	0	0.28	0	0.31	0.04	0.3	A530032D15Rik
chr9:88851757-88857254	0	0.28	0	0	0	0.18	Bcl2a1a
chr2:10415141-10415214	0	0.27	0.71	0.53	0.88	0.52	Mir467a-1
chr13:101051075-101086571	0	0.27	0	0.23	0	0.19	Naip6
chr2:85487519-85488476	0	0.27	0.59	0.16	0.47	0.48	Olfr1002
chr13:21902335-21902728	0	0.27	0.14	0.1	0	0	Hist1h2ap
chr4:73062065-73066106	0	0.26	0.55	0.43	0.78	0.44	Gm11487
chr5:121326150-121337607	0	0.26	0.9	0.14	0.68	0.98	Oas1g
chr13:101053069-101087643	0	0.25	0	0.22	0	0.18	Naip7
chr2:77733709-77784410	0	0.25	0.58	0.22	0.28	0.01	Cwc22
chr12:105133135-105143160	0	0.25	0	0	0	0.55	Serpina1c
chr3:92761311-92762496	0	0.24	0.05	0.23	0.04	0.09	Gm9782
chr9:88583442-88614636	0	0.24	0.08	0.19	0.02	0.07	Gm2382
chr10:128623539-128624475	0	0.24	0	0.15	0	0.03	Olfr773
chrX:34907916-34912222	0	0.24	0.7	0.15	0.69	0.74	Rhox2d
chr10:57697595-57699408	0	0.24	0	0.07	0	0.38	Gm4981
chrX:10885949-10886267	0	0.23	0	0.44	0.01	0	Gm14475
chr2:10422448-10422531	0	0.23	0	0.25	0.02	0.45	Mir467a-2
chr17:39673086-39677792	0	0.23	0.29	0.24	0.11	0.02	Gm4345
chr2:10422453-10422526	0	0.23	0	0.24	0.02	0.44	Mir467a-1
chr12:89080291-89085164	0	0.23	0.24	0.19	0.2	0	Gm16381
chr2:88064236-88065187	0	0.23	0.52	0.03	0.02	0	Olfr1170
chrX:10885880-10886389	0	0.22	0	0.43	0	0	Gm14482
chrX:10885885-10886386	0	0.22	0	0.43	0	0	Gm14483
chr12:88985074-88989933	0	0.22	0	0.36	0	0.61	Gm16381
chr10:117642019-117647102	0	0.22	0.84	0.28	0.82	0.16	Il22
chr4:143141602-143148139	0	0.22	0.42	0.28	0.5	0.4	Gm13040
chr5:94064210-94100489	0	0.22	0.73	0.26	0.71	0.12	C87414
chr7:5495798-5496701	0	0.22	0.97	0.26	0.99	0.25	Vmn1r60
chr4:143157369-143163701	0	0.22	0.47	0.19	0.66	0.34	BC080695
chr5:95902559-95914124	0	0.22	0	0.06	0.1	0.39	Gm3286
chr14:25112585-25129181	0	0.22	0.38	0	0.1	0.05	E330034G19Rik
chr4:143860535-143870369	0	0.22	0	0	0	0	Pramel5
chr2:10417606-10417689	0	0.21	0.84	0.4	0.89	0.87	Mir467a-2
chr2:10417611-10417684	0	0.21	0.84	0.4	0.89	0.87	Mir467a-1
chr2:89470096-89471053	0	0.21	0.79	0.17	0.49	0.09	Olfr1249
chr5:147367688-147370491	0	0.21	0	0.17	0.07	0.45	Gm3415
chr5:147367711-147370491	0	0.21	0	0.17	0.07	0.45	Gm3402
chr6:41365305-41369592	0	0.21	0.31	0.11	0.18	0	Gm5409
chr12:85291557-85293903	0	0.21	0.06	0.09	0	0.33	2410016O06Rik
chr9:38306255-38307188	0	0.21	0	0.06	0.17	0.4	Olfr907
chr6:42421233-42422175	0	0.21	0.4	0	0	0	Olfr457
chr8:22234649-22235729	0	0.2	0.67	0.17	0.65	0.33	Gm14851
chr5:26425207-26431854	0	0.2	0.19	0.13	0	0.41	5031410I06Rik
chr7:23656242-23657166	0	0.2	0	0.07	0	0.16	Vmn1r160
chr7:27716649-27724405	0	0.2	0	0	0	0.25	Cyp2a22
chr14:51575815-51584424	0	0.19	0.15	0.3	0.22	0.02	Pnp2
chr3:92748407-92749652	0	0.19	0.34	0.26	0.62	0.61	Lce3c
chrX:145532494-145572695	0	0.19	0.3	0.07	0.09	0	Gm15085
chr17:34644879-34654297	0	0.19	0	0.02	0	0.19	Btnl6
chr10:78074413-78080819	0	0.19	0.28	0.01	0.05	0.1	Olfr1357
chr14:50654065-50655175	0	0.19	0.02	0	0	0	Olfr725
chr2:36245430-36245515	0	0.19	0.31	0	0	0	Mir684-1
chr2:88025035-88025974	0	0.19	0.48	0	0	0	Olfr1168
chr7:46662663-46668530	0	0.19	0	0	0	0.16	Gm5114
chrX:35017401-35022193	0	0.18	0.23	0.4	0.46	0.62	Rhox4f
chr4:143101214-143107736	0	0.18	0.49	0.26	0.45	0.39	Gm13040
chr4:143101245-143107734	0	0.18	0.48	0.26	0.43	0.39	Gm13043
chr7:19371650-19374763	0	0.18	0.04	0.25	0.23	0.04	Sycp1-ps1
chr13:21903652-21903964	0	0.18	0.32	0.2	0.41	0.07	Hist1h4n
chr7:115773507-115774440	0	0.18	0.32	0.12	0.41	0.28	Olfr508
chr7:21357946-21358840	0	0.18	0.23	0.1	0.15	0	Vmn1r157
chr13:21902235-21902749	0	0.18	0.13	0.06	0.02	0	Hist1h2ao
chr4:88443140-88444108	0	0.18	0.02	0	0.06	0.41	Gm13279
chr8:22194718-22195695	0	0.17	0.76	0.17	0.61	0.54	Defa23
chr8:22194718-22195696	0	0.17	0.76	0.17	0.61	0.54	Defa-rs7
chr13:21903614-21904019	0	0.17	0.31	0.12	0.33	0.08	Hist1h4m
chr12:89558565-89560206	0	0.17	0.28	0.11	0.29	0.04	Gm5039
chr6:47622224-47622398	0	0.17	0.04	0.01	0.19	0.39	Rn4.5s
chr15:77414587-77426555	0	0.17	0.67	0	0.07	0.87	Apol10b
chr2:10403387-10403474	0	0.16	0	0.3	0.07	0.07	Mir669a-10
chr2:10403381-10403476	0	0.16	0	0.29	0.06	0.07	Mir669a-2
chr2:10403383-10403480	0	0.16	0	0.29	0.07	0.07	Mir669a-1
chr19:39303743-39349227	0	0.16	0.31	0.16	0.03	0.42	Cyp2c53-ps
chr7:22881885-22882779	0	0.16	0.38	0.14	0.38	0	Vmn1r139
chr7:3789723-3849722	0	0.16	0.16	0.09	0.19	0	Pira7
chr7:3789728-3849694	0	0.16	0.16	0.09	0.19	0	Pira4
chr7:3789755-3849695	0	0.16	0.16	0.09	0.19	0	Pira11
chr7:21556203-21557097	0	0.16	0.2	0.08	0.09	0	Vmn1r112
chr9:88618125-88626688	0	0.16	0	0.07	0	0.06	Bcl2a1d
chr6:56974331-56975267	0	0.16	0.03	0	0	0.01	Vmn1r7
chr7:21657274-21658198	0	0.16	0	0	0	0	Vmn1r116
chr7:9927006-9944061	0	0.15	0.12	0.35	0.59	0.81	Vmn2r42
chr4:143125856-143132374	0	0.15	0.47	0.26	0.59	0.41	Gm13040
chr12:89099797-89104138	0	0.15	0.33	0.23	0.5	0.45	Gm1995
chr8:74581558-74582574	0	0.15	0.26	0.22	0.05	0.35	Olfr372
chr15:79722837-79738859	0	0.15	0.84	0.15	0.82	0.97	Apobec3
chr7:22399110-22400004	0	0.15	0.29	0.09	0.21	0	Vmn1r139
chr7:21947203-21948127	0	0.15	0.24	0.04	0.27	0.39	Vmn1r123
chr2:87736333-87737290	0	0.15	0.32	0	0.06	0.26	Olfr1153
chr5:109715287-109726575	0	0.15	0.08	0	0	0	Vmn2r15
chr3:88187416-88188386	0	0.14	0.06	0.56	0.21	0.8	Bglap
chr6:41323757-41327612	0	0.14	0.09	0.4	0	0.52	Prss3
chr5:95734941-95772594	0	0.14	0.44	0.16	0.39	0.62	Gm3259
chr3:88181657-88182621	0	0.14	0	0.08	0	0.2	Bglap2
chr7:21059308-21060274	0	0.14	0	0.03	0	0	Gm10665
chr1:176047221-176048145	0	0.14	0.24	0	0.26	0.57	Olfr231
chr4:88443300-88443849	0	0.14	0.02	0	0.1	0.42	Gm13285
chr9:78104935-78116973	0	0.14	0.4	0	0.15	0.21	Gm3776
chr12:89112519-89116307	0	0.13	0.24	0.42	0.51	0.16	Gm2016
chrX:34826611-34831313	0	0.13	0.36	0.2	0.38	0.54	Rhox2b
chr13:67768377-67784449	0	0.13	0	0.11	0.15	0.14	Zfp738
chr4:63017195-63020545	0	0.13	0.48	0.1	0.5	0.53	Orm3
chr13:50738596-50741207	0	0.13	0.41	0.09	0.31	0	Gm904
chr17:8321455-8340697	0	0.13	0.33	0.04	0.2	0	Rnaset2b
chr17:8321462-8340653	0	0.13	0.33	0.04	0.2	0	Rnaset2a
chr8:22639501-22640484	0	0.12	0	0.44	0.33	0.11	Gm15308
chr4:122366501-122382378	0	0.12	0.08	0.3	0.21	0	9530002B09Rik
chr9:22030146-22044137	0	0.12	0	0.29	0	0.48	Zfp809
chr9:22030155-22044137	0	0.12	0	0.29	0	0.48	Zfp809
chr2:90240796-90241831	0	0.12	0	0.15	0	0.1	Olfr1274-ps
chr7:48539696-48545553	0	0.12	0.65	0.14	0.47	0.35	Gm5592
chr7:22880538-22882940	0	0.12	0.23	0.09	0.2	0	Vmn1r132
chr7:25507512-25509309	0	0.12	0.15	0.09	0.14	0	Gm4763
chr7:3788416-3867086	0	0.12	0.28	0.09	0.55	0.1	Pira1
chrX:8262456-8267970	0	0.12	0.48	0.09	0.44	0.38	Ssxb8
chr13:120276063-120277191	0	0.12	0.5	0.08	0.21	0.09	3110070M22Rik
chr4:61744510-61748346	0	0.12	0	0.06	0	0	Mup3
chr9:38935751-38952655	0	0.12	0.57	0.04	0	0.01	Olfr27
chr10:129338831-129339782	0	0.12	0	0	0	0	Olfr815
chrX:144923491-144955989	0	0.12	0.15	0	0	0	Gm15114
chr7:23546715-23547609	0	0.11	0.05	0.14	0.07	0	Vmn1r157
chr2:85815369-85816430	0	0.11	0	0.12	0	0	Olfr1029
chrX:145540098-145572695	0	0.11	0.27	0.04	0.11	0	Gm15093
chr14:6804350-6811001	0	0.11	0.83	0	0.68	0.68	Gm3317
chr8:22565898-22566989	0	0.1	0.03	0.43	0.1	0.37	Gm7849
chr17:35561791-35565306	0	0.1	0	0.3	0.08	0.11	H2-Q8
chr17:35561821-35565306	0	0.1	0	0.3	0.09	0.11	H2-Q6
chr15:77307476-77321499	0	0.1	0.08	0.27	0.06	0.37	Apol10a
chr10:78379586-78380681	0	0.1	0	0.25	0	0	Olfr1354
chr9:22030146-22047798	0	0.1	0	0.25	0	0.33	Zfp809
chr1:21339757-21342280	0	0.1	0.03	0.19	0.11	0	Khdc1a
chr14:52331318-52336807	0	0.1	0	0.19	0.02	0.22	Gm5800
chr8:44710328-44712539	0	0.1	0.35	0.11	0.17	0.28	Gm5346
chr2:10405816-10405911	0	0.1	0.14	0.09	0.27	0.53	Mir669a-2
chr2:10405818-10405915	0	0.1	0.14	0.09	0.27	0.53	Mir669a-1
chr2:10405822-10405909	0	0.1	0.14	0.09	0.27	0.53	Mir669a-10
chr7:5753949-5757047	0	0.1	0	0.09	0	0	Vmn1r63
chr6:47609240-47609414	0	0.1	0.35	0.07	0.34	0.02	Rn4.5s
chr7:22397763-22400165	0	0.1	0.2	0.07	0.16	0	Vmn1r132
chr1:176081611-176082661	0	0.1	0.15	0.06	0.11	0	Olfr421-ps1
chrX:145882159-145922327	0	0.1	0.26	0.05	0.14	0	Gm15085
chr1:84836415-84897061	0	0.1	0	0.02	0	0.01	Fbxo36
chr1:84903279-84931658	0	0.1	0	0.01	0	0	Slc16a14
chr2:129190315-129196856	0	0.1	0.3	0	0.14	0.04	Il1b
chr2:87593212-87594148	0	0.1	0.35	0	0.26	0.12	Olfr1141
chr6:130168848-130183340	0	0.1	0.5	0	0.16	0.46	Klra7
chr8:22566010-22566989	0	0.09	0.03	0.42	0.11	0.37	Gm7861
chrX:144756676-144789273	0	0.09	0.36	0.07	0.19	0	Gm15093
chr3:92770982-92772203	0	0.09	0.05	0.05	0.09	0.27	2310001H18Rik
chrX:145706919-145739546	0	0.09	0.29	0.04	0.15	0	Gm15093
chrX:145889719-145922327	0	0.09	0.29	0.04	0.16	0	Gm15093
chr6:3322256-3349571	0	0.09	0.74	0.02	0.04	0	Samd9l
chr2:80468861-80468947	0	0.09	0.05	0	0	0	Mir684-1
chr6:130168622-130181705	0	0.09	0.48	0	0.14	0.43	Klra7
chr7:9147158-9163091	0	0.08	0.17	0.22	0.48	0.76	Vmn2r39
chr7:111503911-111507160	0	0.08	0.96	0.18	0.93	0.93	Trim30b
chr4:3111531-3112452	0	0.08	0.71	0.04	0.48	0.09	Vmn1r3
chr17:35479277-35482667	0	0.08	0.48	0.01	0.26	0	H2-Q2
chr6:122086645-122100976	0	0.08	0	0	0	0.13	Gm10319
chrX:8563025-8563881	0	0.08	0.67	0	0.61	0.63	Gm14458
chr8:22693498-22694339	0	0.07	0	0.3	0	0.23	Gm6696
chr8:22766238-22767208	0	0.07	0.59	0.24	0.78	0.63	Defa17
chr15:101473450-101477811	0	0.07	0	0.15	0.03	0.04	Gm5478
chr4:143399893-143405996	0	0.07	0.97	0.11	0.79	0.51	Gm13084
chr4:88437453-88438002	0	0.07	0	0.09	0	0.1	Gm13285
chr7:8317008-8332944	0	0.07	0.33	0.08	0.68	0.37	Vmn2r46
chr10:51200484-51206025	0	0.07	0.13	0.03	0.21	0.02	Gp49a
chr10:57693398-57695423	0	0.07	0	0	0.06	0.35	Dux
chr17:39979941-39985774	0	0.07	0.03	0	0	0	Rn45s
chr3:94464510-94471074	0	0.07	0.68	0	0.32	0.46	BC021767
chr7:110915790-110920108	0	0.07	0	0	0	0	Olfr69
chr7:21254266-21255190	0	0.07	0	0	0	0	Vmn1r107
chr7:24289660-24290608	0	0.07	0.17	0	0.04	0	Vmn1r167
chr9:35452697-35455787	0	0.07	0	0	0	0.18	Gm17365
chr9:78078475-78090490	0	0.07	0.35	0	0.15	0.28	Gsta1
chr7:67004101-67004191	0	0.06	0.49	0.34	0.92	0.9	Snord116
chr1:21358411-21359824	0	0.06	0	0.32	0	0.12	Khdc1c
chr7:110888714-110889836	0	0.06	0	0.18	0.06	0	Olfr629
chr8:36645556-36652074	0	0.06	0.02	0.15	0.08	0	Gm16793
chr6:41342354-41347255	0	0.06	0.03	0.14	0.13	0	Gm5771
chr13:50357183-50358238	0	0.06	0.09	0.12	0.1	0	2310081J21Rik
chr7:111701397-111702466	0	0.06	0.04	0.05	0.01	0	Olfr651
chr8:19445769-19447606	0	0.06	0.04	0.05	0.01	0	Defb8
chr8:19495096-19497775	0	0.06	0	0.04	0	0.01	Defb7
chr2:111911802-111912738	0	0.06	0	0.03	0	0	Olfr1313
chr7:33226559-33227863	0	0.06	0.51	0.03	0.26	0.17	Scgb1b29
chrX:4219982-4221937	0	0.06	0	0.03	0.14	0.38	Gm5925
chr1:175850533-175872591	0	0.06	0.49	0.02	0.07	0.52	Ifi203
chr1:175850533-175872623	0	0.06	0.49	0.02	0.07	0.52	Ifi203
chrX:146219021-146419525	0	0.06	0.4	0	0.05	0.07	Gm15127
chrX:64092226-64092300	0	0.06	0.2	0	0.18	0.4	Mir465
chr10:111497244-111515566	0	0.05	0	0.2	0	0.25	Glipr1l1
chr7:134525773-134530680	0	0.05	0.3	0.2	0.5	0.14	9130019O22Rik
chr6:58215167-58216076	0	0.05	0	0.08	0	0	Vmn1r28
chr7:115098156-115099089	0	0.05	0.11	0.06	0.22	0	Olfr474
chr7:20918490-20919414	0	0.05	0	0.06	0	0	Gm4133
chr8:22204716-22205680	0	0.05	0.76	0.06	0.79	0.5	Gm10104
chr7:115355096-115356041	0	0.05	0.63	0.05	0.48	0.19	Olfr487
chr13:120251565-120274924	0	0.05	0	0.03	0	0.1	4833420G17Rik
chr10:77233377-77234070	0	0.05	0	0	0	0.01	Gm3238
chr12:105091504-105101829	0	0.05	0.23	0	0	0.38	Serpina1a
chr2:10420019-10420102	0	0.05	0.63	0	0.36	0.44	Mir467a-2
chr2:10420024-10420097	0	0.05	0.63	0	0.36	0.44	Mir467a-1
chr7:12778313-12779240	0	0.05	0	0	0	0	Vmn1r80
chr7:23248128-23249094	0	0.05	0	0	0	0	Gm10665
chr7:23283779-23284697	0	0.05	0	0	0	0	Vmn1r151
chr7:51462804-51467124	0	0.05	0	0	0.05	0.23	Klk1b4
chrX:146219046-146261237	0	0.05	0.04	0	0	0	Gm15097
chrX:67798732-67799560	0	0.04	0.61	0.16	0.63	0.59	Gm14725
chr1:94469701-94470783	0	0.04	0	0.1	0	0.1	Olfr1413
chr10:128569886-128570822	0	0.04	0.03	0.1	0	0.07	Olfr770
chr4:73296797-73303176	0	0.04	0	0.09	0	0.04	LOC100502924
chr7:66931359-66931449	0	0.04	0.14	0.08	0.23	0.01	Snord116
chr7:111041323-111042985	0	0.04	0.67	0.07	0.44	0.72	Olfr64
chr14:77424007-77436424	0	0.04	0.25	0.05	0.78	0.86	Lacc1
chr14:6973740-6991301	0	0.04	0.63	0.04	0.66	0.67	Gm3020
chr2:176637496-176649142	0	0.04	0.07	0.01	0.12	0.31	Gm14405
chr12:105001796-105011843	0	0.04	0.5	0	0	0.77	Serpina1d
chr4:88422825-88423374	0	0.04	0.17	0	0.05	0.03	Gm13285
chr7:23222324-23223248	0	0.04	0	0	0	0	Vmn1r101
chr7:24593304-24594219	0	0.04	0.4	0	0.55	0.66	Vmn1r175
chr7:54681698-54707509	0	0.04	0.87	0	0.8	0.79	Mrgpra2a
chrX:58144540-58146605	0	0.03	0.34	0.38	0.31	0.61	Sox3
chr4:73562631-73566664	0	0.03	0	0.19	0.04	0.52	Gm11756
chrX:29130521-29153403	0	0.03	0.47	0.15	0.54	0.34	Gm10096
chrX:29130521-29153420	0	0.03	0.47	0.15	0.54	0.34	Gm10486
chrX:29130549-29153420	0	0.03	0.47	0.15	0.54	0.34	Gm10230
chrX:29130552-29153401	0	0.03	0.47	0.15	0.54	0.34	Gm10488
chrX:29130552-29153416	0	0.03	0.47	0.15	0.54	0.34	Gm10058
chrX:29130581-29153420	0	0.03	0.47	0.15	0.54	0.34	Gm10147
chr7:23155140-23156058	0	0.03	0	0.1	0	0	Gm5728
chr7:10339984-10355920	0	0.03	0.21	0.06	0.54	0.23	Vmn2r46
chr13:15899075-15919370	0	0.03	0	0.04	0	0	A530046M15
chr3:64341482-64363740	0	0.03	0	0.03	0	0.04	Vmn2r6
chrX:8552837-8553685	0	0.03	0.66	0.01	0.66	0.71	Gm14511
chr4:88452089-88452638	0	0.03	0.13	0	0.07	0.03	Gm13285
chr6:132311122-132314152	0	0.03	0.13	0	0.01	0.25	Gm8882
chr7:19007884-19017404	0	0.03	0.05	0	0	0.06	Psg28
chr7:23349441-23350362	0	0.03	0.04	0	0	0	Gm4141
chr8:97814493-97830485	0	0.03	0.17	0	0.07	0	Cngb1
chrX:24129375-24152021	0	0.03	0.39	0	0.09	0.44	Gm4297
chrX:24330287-24352290	0	0.03	0.32	0	0.11	0.39	Gm5935
chr17:35576099-35580718	0	0.02	0	0.28	0.33	0	H2-Q7
chr17:35576111-35580715	0	0.02	0	0.28	0.32	0	H2-Q9
chr8:22274328-22275277	0	0.02	0	0.16	0.01	0	Gm15284
chr12:56225514-56243069	0	0.02	0	0.12	0.04	0	1700047I17Rik2
chr7:20959841-20960759	0	0.02	0	0.1	0	0	Gm5728
chr16:59097891-59098816	0	0.02	0	0.08	0.05	0	Olfr192
chr7:23113812-23114736	0	0.02	0	0.06	0	0	Gm4133
chr11:99676289-99676980	0	0.02	0.03	0.05	0.11	0	Gm11564
chr13:33096409-33109824	0	0.02	0.38	0.05	0.33	0	Serpinb9
chr14:3757740-3775300	0	0.02	0.58	0.05	0.66	0.61	Gm3020
chr14:41985500-41998487	0	0.02	0	0.04	0	0.04	Sftpd
chr15:100165359-100170600	0	0.02	0.13	0.04	0.2	0	Mettl7a3
chr14:3518337-3535897	0	0.02	0.59	0.03	0.61	0.64	Gm3020
chr7:34728015-34730004	0	0.02	0	0.01	0	0.02	Scgb2b26
chr10:81364655-81393225	0	0.02	0.82	0	0.82	0.81	Zfp781
chr14:74755333-74769548	0	0.02	0	0	0	0.04	4933402J15Rik
chr15:63655900-63676731	0	0.02	0.96	0	0.64	0.88	Gsdmc2
chr15:79913288-79913336	0	0.02	0.27	0	0.58	0.72	Snord43
chr17:7109064-7152705	0	0.02	0.06	0	0.06	0.22	Rsph3b
chr2:10405304-10405387	0	0.02	0.6	0	0.56	0.76	Mir467a-10
chr2:87989140-87990240	0	0.02	0	0	0	0	Olfr1167
chr2:88937094-88938120	0	0.02	0.05	0	0	0	Olfr1220
chr7:115315311-115316256	0	0.02	0.65	0	0.53	0.24	Olfr486
chr7:147336526-147340558	0	0.02	0.78	0	0.13	0.62	Sprn
chr7:22779605-22780529	0	0.02	0	0	0	0	Vmn1r107
chr7:5626923-5627826	0	0.01	0	0.13	0	0	Vmn1r186
chr1:135247142-135256900	0	0.01	0.53	0.08	0.12	0.83	Ren2
chr1:135247250-135256896	0	0.01	0.53	0.08	0.12	0.83	Ren1
chr17:7568060-7589654	0	0.01	0.25	0.06	0.28	0.69	Gm9992
chr7:26301060-26325023	0	0.01	0.02	0.06	0.21	0	Ceacam2
chr7:26846513-26881215	0	0.01	0.03	0.06	0.06	0	Cyp2b13
chr15:82282806-82287257	0	0.01	0.32	0.04	0.52	0.7	Cyp2d9
chr12:3235790-3250374	0	0.01	0.45	0.03	0.59	0	1700012B15Rik
chr10:129402791-129403754	0	0.01	0.18	0.02	0.1	0.14	Olfr819
chr12:89521310-89525514	0	0.01	0.19	0	0.57	0.31	Gm7104
chr13:120217406-120249127	0	0.01	0.11	0	0	0.07	Paip1
chr13:47107925-47110219	0	0.01	0	0	0	0.01	Nhlrc1
chr14:51153088-51154024	0	0.01	0.21	0	0.25	0.26	Olfr743
chr19:12315210-12316149	0	0.01	0.55	0	0.33	0.62	Olfr262
chr4:88437293-88438261	0	0.01	0.16	0	0.07	0.09	Gm13279
chr5:109644520-109653641	0	0.01	0.1	0	0	0.25	Vmn2r14
chr5:11594955-11599480	0	0.01	0.72	0	0.69	0.61	Gm6460
chr5:147337376-147340129	0	0.01	0	0	0	0.1	Gm3404
chr6:128349783-128358953	0	0.01	0.04	0	0.13	0.07	Nrip2
chr6:132545963-132550720	0	0.01	0	0	0	0	Prp2
chr6:41918138-41923089	0	0.01	0.02	0	0.13	0.02	Sval3
chr7:21160669-21161590	0	0.01	0.07	0	0	0	Gm4141
chr7:21918229-21919147	0	0.01	0.06	0	0.12	0.15	Vmn1r122
chr7:55276340-55282967	0	0.01	0.87	0	0.8	0.88	Mrgprx1
chr8:36887762-36889613	0	0.01	0	0	0.05	0.09	Cldn23
chr8:36927138-36946011	0	0.01	0	0	0.48	0.72	5430403N17
chr8:22619727-22620709	0	0	0	0.52	0.58	0	Defa20
chr12:88959858-88963093	0	0	0.06	0.36	0.45	0.12	Gm4027
chr12:89055024-89059124	0	0	0.05	0.35	0.44	0.37	BB287469
chr7:113043632-113102481	0	0	0.13	0.31	0.92	0.44	Gm4070
chr7:113043632-113102484	0	0	0.13	0.31	0.92	0.44	Gvin1
chr8:22703846-22704937	0	0	0.02	0.3	0.06	0.35	Gm7849
chr8:22703958-22704937	0	0	0.02	0.29	0.08	0.35	Gm7861
chr7:113072848-113077205	0	0	0.14	0.26	0.83	0.39	Gm18853
chr7:113072857-113077205	0	0	0.14	0.26	0.83	0.39	Gm17757
chr4:118362107-118363055	0	0	0	0.25	0.14	0	Olfr1342
chr7:113300049-113358851	0	0	0.13	0.25	0.91	0.44	Gm4070
chr7:113300049-113358854	0	0	0.13	0.25	0.91	0.44	Gvin1
chr11:101115056-101120860	0	0	0.09	0.22	0.45	0.43	Vps25
chr7:110708992-110709934	0	0	0	0.19	0	0	Olfr615
chr4:88434535-88435084	0	0	0	0.16	0	0.03	Gm13285
chr7:113329256-113333613	0	0	0.13	0.16	0.87	0.45	Gm18853
chr7:113329265-113333613	0	0	0.13	0.16	0.87	0.45	Gm17757
chr6:47694056-47694230	0	0	0	0.15	0.02	0	Rn4.5s
chr9:39807790-39808835	0	0	0.02	0.14	0.13	0	Olfr979
chr12:56300578-56318133	0	0	0	0.12	0.03	0	1700047I17Rik2
chr7:7829363-7855173	0	0	0.22	0.12	0.79	0.71	Vmn2r36
chr7:5626205-5628199	0	0	0	0.11	0	0	Vmn1r62
chr7:8557271-8583081	0	0	0.23	0.11	0.74	0.68	Vmn2r36
chr15:100183630-100192250	0	0	0	0.1	0.24	0	Mettl7a2
chrX:64085691-64085772	0	0	0.67	0.1	0.83	0.82	Mir465c-1
chr14:3757740-3778983	0	0	0.49	0.09	0.67	0.58	Gm10409
chr14:6973740-6994984	0	0	0.55	0.09	0.7	0.62	Gm10409
chr6:123559775-123600653	0	0	0	0.09	0	0.1	Vmn2r22
chr9:22051873-22064339	0	0	0.03	0.09	0.46	0.12	Zfp599
chrX:27889230-27912081	0	0	0.43	0.09	0.54	0.29	Gm10147
chrX:27889230-27912113	0	0	0.43	0.09	0.54	0.29	Gm10230
chrX:27889230-27912141	0	0	0.43	0.09	0.54	0.29	Gm10486
chrX:27889234-27912110	0	0	0.43	0.09	0.54	0.29	Gm10058
chrX:27889247-27912141	0	0	0.43	0.09	0.54	0.29	Gm10096
chrX:27889249-27912110	0	0	0.43	0.09	0.54	0.29	Gm10488
chr13:13088390-13097597	0	0	0.07	0.08	0.44	0.2	Prl2c2
chr13:22179746-22180673	0	0	0	0.08	0.05	0	Vmn1r188
chr14:3518337-3539580	0	0	0.52	0.08	0.65	0.6	Gm10409
chr19:17400630-17414058	0	0	0.9	0.08	0.87	0.95	Gcnt1
chr4:126921027-126925053	0	0	0.01	0.08	0	0.09	BC003266
chr6:123442525-123483424	0	0	0	0.07	0.12	0	Vmn2r21
chr7:147347908-147348847	0	0	0	0.07	0	0.02	Olfr522
chr7:19059930-19069498	0	0	0.07	0.07	0.17	0.02	Psg26
chr7:20941974-20944267	0	0	0	0.07	0	0	Vmn1r-ps79
chr1:175787350-175810318	0	0	0	0.06	0.03	0	Mndal
chr5:109983727-109988012	0	0	0	0.06	0	0.12	Crlf2
chr7:55643895-55645018	0	0	0.99	0.06	0.96	0.88	Mrgprb8
chrX:24475577-24498454	0	0	0.49	0.06	0.59	0.36	Gm10147
chrX:24475577-24498486	0	0	0.49	0.06	0.59	0.36	Gm10230
chrX:24475577-24498514	0	0	0.49	0.06	0.59	0.36	Gm10486
chrX:24475581-24498483	0	0	0.49	0.06	0.59	0.36	Gm10058
chrX:24475594-24498514	0	0	0.49	0.06	0.59	0.36	Gm10096
chr1:175999430-176000384	0	0	0	0.05	0.07	0	Olfr430
chr15:37853707-37890810	0	0	0	0.05	0	0	Rrm2b
chr16:58823606-58826587	0	0	0.04	0.05	0.11	0.31	Olfr175-ps1
chr3:22150291-22150529	0	0	0.6	0.05	0.21	0.58	Rprl2
chr7:49685474-49685739	0	0	0	0.05	0.11	0	Vmn2r-ps60
chrX:32607378-32630294	0	0	0.43	0.05	0.52	0.29	Gm10096
chrX:32607378-32630311	0	0	0.43	0.05	0.52	0.29	Gm10486
chrX:32607406-32630311	0	0	0.43	0.05	0.52	0.29	Gm10230
chrX:32607409-32630292	0	0	0.43	0.05	0.52	0.29	Gm10488
chrX:32607409-32630307	0	0	0.43	0.05	0.52	0.29	Gm10058
chrX:32607438-32630311	0	0	0.43	0.05	0.52	0.29	Gm10147
chrX:52480052-52496913	0	0	0.32	0.05	0.36	0.13	Slxl1
chr10:129420535-129421480	0	0	0	0.04	0	0	Olfr247
chr16:19285886-19286834	0	0	0	0.04	0.09	0	Olfr164
chr16:44820840-44839263	0	0	0	0.04	0	0	Cd200r4
chr2:10412674-10412757	0	0	0.87	0.04	0.47	0.81	Mir467a-10
chr2:10412681-10412752	0	0	0.87	0.04	0.48	0.81	Mir467a-1
chr4:143780619-143786837	0	0	0.66	0.04	0.25	0.57	Oog2
chr4:73329417-73333463	0	0	0.69	0.04	0.03	0.83	Gm428
chr4:88425753-88426564	0	0	0	0.04	0.01	0	Gm13272
chr4:88433880-88435342	0	0	0	0.04	0	0.05	Gm13277
chr7:113949023-113949974	0	0	0.03	0.04	0.38	0.14	Olfr700
chr7:152391722-152394024	0	0	0	0.04	0.01	0	1810010D01Rik
chr7:19303438-19312597	0	0	0.02	0.04	0.35	0.51	Psg22
chr7:3859881-3867103	0	0	0.4	0.04	0.51	0.25	Lilra6
chr7:51453560-51457721	0	0	0	0.04	0	0.11	Klk1b3
chr8:22165223-22166196	0	0	0.27	0.04	0.44	0.73	Defa21
chr9:35941871-35943215	0	0	0	0.04	0	0	Gm3434
chr14:27022152-27026527	0	0	0.05	0.03	0	0.08	D14Ertd449e
chr17:36281962-36299319	0	0	0.02	0.03	0.1	0	2410017I17Rik
chr17:6429259-6435443	0	0	0.47	0.03	0.82	0.26	Dynlt1b
chr2:86530188-86531130	0	0	0.51	0.03	0.54	0.77	Olfr1087
chr4:62160087-62163234	0	0	0	0.03	0	0	Hdhd3
chr4:88425753-88426302	0	0	0.03	0.03	0.05	0	Gm13285
chr5:147325698-147328478	0	0	0.42	0.03	0.23	0.68	Gm3402
chr7:23137281-23139574	0	0	0	0.03	0	0	Vmn1r-ps79
chr1:87497277-87541611	0	0	0.09	0.02	0.19	0.07	Sp140
chr14:27022852-27026527	0	0	0.1	0.02	0	0.1	Gm10395
chr14:27041389-27055226	0	0	0	0.02	0	0	Gm2104
chr14:27041393-27055221	0	0	0	0.02	0	0	Cphx
chr15:79746236-79763076	0	0	0.83	0.02	0.79	0.87	Cbx7
chr16:59085377-59086307	0	0	0	0.02	0	0	Olfr191
chr3:107784619-107789354	0	0	0.01	0.02	0.05	0	Gstm2
chr10:103631096-103633547	0	0	0.12	0.01	0.2	0	Gm6763
chr17:23596641-23616564	0	0	0.46	0.01	0.31	0.42	Vmn2r117
chr5:110362581-110370729	0	0	0.29	0.01	0	0.32	LOC100642166
chr6:56906506-56907400	0	0	0	0.01	0	0	Vmn1r4
chr7:113465909-113468042	0	0	0.16	0.01	0.95	0.58	Gm8989
chr7:24443334-24445682	0	0	0.11	0.01	0.01	0.16	Vmn1r172
chr7:26682682-26711643	0	0	0.08	0.01	0	0.07	Cyp2b10
chrX:28236042-28258881	0	0	0.46	0.01	0.54	0.33	Gm10147
chrX:28236042-28258913	0	0	0.46	0.01	0.54	0.33	Gm10230
chrX:28236042-28258941	0	0	0.46	0.01	0.54	0.33	Gm10486
chrX:28236046-28258910	0	0	0.46	0.01	0.54	0.33	Gm10058
chrX:28236059-28258941	0	0	0.46	0.01	0.54	0.33	Gm10096
chrX:28236061-28258910	0	0	0.46	0.01	0.54	0.33	Gm10488
chr1:135206399-135219603	0	0	0	0	0	0	Golt1a
chr1:175200277-175201268	0	0	0.53	0	0.31	0.51	Olfr418-ps1
chr1:175451441-175466088	0	0	0	0	0	0	BC094916
chr1:175560989-175578059	0	0	0.55	0	0.56	0.6	Pyhin1
chr1:176019168-176020111	0	0	0	0	0	0	Olfr429
chr1:176029590-176030538	0	0	0.34	0	0.34	0.43	Olfr427
chr1:176029590-176030541	0	0	0.34	0	0.34	0.43	Olfr426
chr1:176066876-176067824	0	0	0.08	0	0.19	0.04	Olfr424
chr1:176088852-176089898	0	0	0	0	0.32	0.14	Olfr420
chr1:176260648-176263008	0	0	0.84	0	0.36	0.88	1810030J14Rik
chr1:19198994-19228815	0	0	0	0	0	0	Tfap2b
chr1:19202134-19228815	0	0	0	0	0	0	Tfap2b
chr1:21373636-21376465	0	0	0	0	0	0	Khdc1b
chr1:65973095-65974878	0	0	0.36	0	0.6	0.65	Crygf
chr1:90303593-90323013	0	0	0	0	0.02	0	Spp2
chr1:90396445-90406641	0	0	0	0	0.08	0.02	Glrp1
chr1:94387394-94388330	0	0	0.02	0	0.16	0.18	Olfr1415
chr1:95815013-95837816	0	0	0.1	0	0.21	0.08	Gm9994
chr10:103605568-103608009	0	0	0.28	0	0.22	0.03	Gm6763
chr10:103605568-103608038	0	0	0.29	0	0.23	0.04	LOC100861901
chr10:103605568-103616547	0	0	0.1	0	0.16	0	Gm4340
chr10:103614078-103625055	0	0	0.07	0	0.15	0	Gm4340
chr10:103622587-103625026	0	0	0.2	0	0.27	0.04	Gm6763
chr10:103622587-103625055	0	0	0.2	0	0.28	0.04	LOC100861901
chr10:103631096-103633576	0	0	0.12	0	0.2	0	LOC100861901
chr10:117125960-117147772	0	0	0	0	0	0	Mdm2
chr10:121885554-121890509	0	0	0	0	0	0	Avpr1a
chr10:128426969-128427908	0	0	0	0	0	0	Olfr9
chr10:128597084-128598038	0	0	0	0	0	0	Olfr771
chr10:129454418-129455357	0	0	0.01	0	0.06	0	Olfr820
chr10:129511467-129512406	0	0	0	0	0.03	0	Olfr822
chr10:22026525-22032748	0	0	0.52	0	0.55	0.47	C920009B18Rik
chr10:81167569-81184721	0	0	0.83	0	0.77	0.73	Zfp433
chr10:81205565-81233887	0	0	0.73	0	0.74	0.58	Zfp781
chr10:81326678-81343831	0	0	0.85	0	0.83	0.89	Zfp433
chr11:101107647-101109564	0	0	0	0	0	0	Ramp2
chr11:101268153-101278747	0	0	0	0	0	0	Aarsd1
chr11:73218951-73223325	0	0	0.16	0	0	0.33	Olfr75-ps1
chr11:73218951-73223360	0	0	0.16	0	0	0.32	Olfr75-ps1
chr11:73266776-73267712	0	0	0	0	0	0	Olfr380
chr11:73797163-73798108	0	0	0.18	0	0.16	0.1	Olfr398
chr11:87570365-87570429	0	0	0.15	0	0.23	0.33	Mir142
chr11:98508072-98519271	0	0	0	0	0	0	Gsdma2
chr12:82829398-82882157	0	0	0	0	0.2	0.25	Map3k9
chr12:85328810-85334825	0	0	0	0	0	0	Acot2
chr12:88855265-88859215	0	0	0	0	0	0.03	Gm8300
chr12:89131277-89135166	0	0	0	0	0	0.41	Gm2022
chr12:89509079-89512941	0	0	0.09	0	0.26	0.4	Gm5662
chr13:13275048-13284107	0	0	0.03	0	0.16	0.25	Prl2c5
chr13:13449887-13485891	0	0	0	0	0.03	0	Gpr137b
chr13:22897448-22898387	0	0	0.15	0	0.07	0.17	Vmn1r209
chr13:50513245-50529138	0	0	0.68	0	0	0.54	Fbxw17
chr13:50774538-50775593	0	0	0.02	0	0.04	0.15	2310081J21Rik
chr13:50848761-50860617	0	0	0.14	0	0.14	0.37	4930518P08Rik
chr13:5854754-5857338	0	0	0.27	0	0.24	0.15	1700016G22Rik
chr13:5860734-5869639	0	0	0	0	0	0.03	Klf6
chr13:67964262-67964860	0	0	0.39	0	0.38	0.43	BC048507
chr13:8971723-8995258	0	0	0	0	0	0.01	Gtpbp4
chr14:15007643-15008594	0	0	0	0	0	0	Olfr720
chr14:26707419-26722457	0	0	0.01	0	0.08	0	Gm10393
chr14:26707888-26722379	0	0	0.02	0	0.07	0	Plac9
chr14:26742783-26746736	0	0	0	0	0	0	D14Ertd449e
chr14:26742783-26747158	0	0	0	0	0	0	D14Ertd449e
chr14:26743482-26746647	0	0	0	0	0	0	Gm9746
chr14:26743482-26747142	0	0	0	0	0	0	Gm9746
chr14:26743483-26746725	0	0	0	0	0	0	Gm10395
chr14:26743483-26747158	0	0	0	0	0	0	Gm10395
chr14:26847189-26862223	0	0	0	0	0	0.09	Gm10393
chr14:26847658-26862145	0	0	0.02	0	0	0.12	Plac9
chr14:26883235-26886400	0	0	0	0	0.01	0	Gm9746
chr14:26883236-26886478	0	0	0	0	0.02	0	Gm10395
chr14:26986803-27001837	0	0	0	0	0	0	Gm10393
chr14:26987272-27001759	0	0	0	0	0	0	Plac9
chr14:51272913-51273858	0	0	0	0	0	0	Olfr746
chr14:54285614-54288010	0	0	0.28	0	0.42	0.26	A430107P09Rik
chr14:56678580-56681147	0	0	0.46	0	0.33	0.24	Mcpt4
chr15:31531870-31547290	0	0	0.54	0	0	0.82	Fam173b
chr15:63648742-63651095	0	0	0.45	0	0.73	0.51	1700065I16Rik
chr15:63678863-63682497	0	0	0.03	0	0	0	Gsdmcl1
chr15:63689279-63710113	0	0	0.04	0	0.04	0.13	Gsdmc3
chr15:77464380-77473716	0	0	0	0	0	0	Apol11b
chr15:79719961-79723568	0	0	0.64	0	0.7	0.74	D730005E14Rik
chr15:82200956-82210690	0	0	0	0	0	0	Cyp2d22
chr16:11193129-11203385	0	0	0	0	0	0	Rsl1d1
chr16:16819805-16820289	0	0	0.22	0	0.21	0.36	Rpl31-ps12
chr16:36359467-36367656	0	0	0.21	0	0.29	0.08	BC100530
chr16:98168598-98183786	0	0	0	0	0	0	Zfp295
chr17:13679886-13746960	0	0	0.01	0	0	0	2700054A10Rik
chr17:17258346-17283842	0	0	0.54	0	0.23	0.19	Zfp97
chr17:23080150-23095781	0	0	0.12	0	0.08	0.17	Vmn2r113
chr17:23141937-23143626	0	0	0	0	0	0	Vmn2r-ps129
chr17:23480943-23497095	0	0	0.36	0	0.28	0.36	Vmn2r115
chr17:23521769-23538831	0	0	0	0	0.04	0	Vmn2r116
chr17:24017842-24019820	0	0	0.71	0	0.64	0.8	Dcpp1
chr17:31298340-31301998	0	0	0	0	0	0	Tff1
chr17:32673573-32688742	0	0	0.05	0	0	0	Cyp4f16
chr17:34165210-34168635	0	0	0.07	0	0.08	0.35	Slc39a7
chr17:35402723-35462354	0	0	0	0	0.03	0	LOC547349
chr17:35457502-35462044	0	0	0.03	0	0	0	H2-Q1
chr17:36084098-36090262	0	0	0.11	0	0.24	0.07	Gm8801
chr17:36179905-36195590	0	0	0.25	0	0.58	0.55	Gm6034
chr17:36217133-36221194	0	0	0.51	0	0.55	0.57	H2-Bl
chr17:36322515-36327096	0	0	0	0	0	0	H2-T3
chr17:36501948-36505362	0	0	0	0	0	0	H2-M10.3
chr17:36806952-36809142	0	0	0	0	0	0	H2-M1
chr17:38553418-38557130	0	0	0.06	0	0.21	0.06	Gm20408
chr17:40087464-40092232	0	0	0.16	0	0.18	0.14	Esp38
chr17:40430706-40456156	0	0	0.33	0	0.2	0.27	Crisp1
chr17:40769023-40774009	0	0	0.12	0	0.2	0.09	Esp3
chr17:53855833-53873168	0	0	0	0	0	0	4932415M13Rik
chr17:7099577-7099686	0	0	0	0	0	0.05	Mir692-1
chr17:7229891-7291946	0	0	0.07	0	0.19	0.12	Gm1604b
chr17:7529008-7550209	0	0	0	0	0	0	Tcp10a
chr18:3122491-3123412	0	0	0.2	0	0.1	0.09	Vmn1r238
chr18:60535682-60552283	0	0	0	0	0	0	Iigp1
chr19:12284057-12284996	0	0	0.22	0	0.39	0.01	Olfr1431
chr19:12372672-12373620	0	0	0.07	0	0	0.41	Olfr1436
chr19:13575035-13577782	0	0	0	0	0.03	0	Olfr1477
chr19:13889133-13890078	0	0	0.55	0	0.44	0.12	Olfr1499
chr19:34667377-34673917	0	0	0.06	0	0.04	0.08	Gm14446
chr19:34667377-34676458	0	0	0.09	0	0.01	0.09	Gm14446
chr19:36806220-36811094	0	0	0	0	0	0	Ppp1r3c
chr19:61250588-61252212	0	0	0	0	0	0	Gm7102
chr19:61300304-61304321	0	0	0.74	0	0.57	0.69	Csf2ra
chr19:8234657-8293329	0	0	0.03	0	0	0	Slc22a29
chr19:8410112-8479595	0	0	0	0	0	0	Slc22a30
chr2:10413186-10413281	0	0	0.86	0	0.89	0.81	Mir669a-2
chr2:10413188-10413285	0	0	0.86	0	0.89	0.81	Mir669a-1
chr2:10413192-10413279	0	0	0.88	0	0.89	0.81	Mir669a-10
chr2:10425413-10425510	0	0	0.23	0	0.11	0.38	Mir669a-1
chr2:10425417-10425504	0	0	0.23	0	0.12	0.39	Mir669a-10
chr2:120963027-120966434	0	0	0	0	0	0	Lcmt2
chr2:122463622-122466812	0	0	0	0	0	0	AA467197
chr2:122466538-122466617	0	0	0	0	0	0	Mir147
chr2:175295525-175306054	0	0	0.23	0	0.47	0.17	Gm14306
chr2:175295560-175308823	0	0	0.27	0	0.52	0.21	Gm14436
chr2:176131421-176141950	0	0	0.24	0	0.46	0.17	Gm14306
chr2:176131456-176144719	0	0	0.27	0	0.51	0.22	Gm14436
chr2:36232297-36233218	0	0	0	0	0	0	Olfr338
chr2:85270039-85270984	0	0	0	0	0.01	0	Olfr994
chr2:85914860-85915875	0	0	0.33	0	0.34	0.56	Olfr1036
chr2:85924886-85926011	0	0	0.21	0	0.05	0.16	Olfr1037
chr2:86478921-86479875	0	0	0	0	0	0	Olfr1084
chr2:86516555-86517488	0	0	0	0	0	0	Olfr1086
chr2:87586317-87587337	0	0	0.34	0	0.38	0.39	Olfr1140
chr2:87742898-87743831	0	0	0.09	0	0.04	0.14	Olfr1154
chr2:88365657-88366747	0	0	0.21	0	0.25	0.07	Olfr1186
chr2:89322345-89323290	0	0	0	0	0	0	Olfr1241
chr3:59533707-59556319	0	0	0	0	0	0	Gm5538
chr3:88625931-88636409	0	0	0.02	0	0.01	0	1500004A13Rik
chr3:93473254-93480205	0	0	0.25	0	0.43	0.16	Tdpoz1
chr4:112477220-112959578	0	0	0.11	0	0.17	0.18	Skint6
chr4:121286608-121294730	0	0	0.38	0	0.6	0.54	Gm12887
chr4:145651165-145679000	0	0	0.59	0	0.37	0.54	1700095A21Rik
chr4:145658643-145683119	0	0	0.63	0	0.43	0.59	Gm13247
chr4:145728598-145749009	0	0	0.17	0	0.1	0.15	Gm13251
chr4:146506201-146554688	0	0	0.21	0	0.08	0.27	Gm13139
chr4:146514185-146556724	0	0	0.13	0	0.06	0.22	Znf41-ps
chr4:61331211-61335128	0	0	0.15	0	0.23	0.2	LOC100048884
chr4:73311921-73318299	0	0	0.59	0	0.12	0.54	LOC100502924
chr4:88203576-88204149	0	0	0	0	0.16	0.18	Gm12597
chr4:88217132-88217702	0	0	0	0	0	0	Ifna14
chr4:88403747-88404296	0	0	0.12	0	0.09	0.19	Gm13286
chr4:88406677-88407488	0	0	0	0	0.08	0.07	Gm13283
chr4:88419737-88420705	0	0	0.04	0	0.13	0.25	Gm13289
chr4:88419897-88420446	0	0	0.02	0	0.03	0.01	Gm13285
chr4:88422665-88423633	0	0	0	0	0.01	0.03	Gm13289
chr4:88428034-88429496	0	0	0	0	0	0	Ifnz
chr4:88430957-88432419	0	0	0	0	0.05	0.19	Gm13276
chr4:88436798-88438260	0	0	0	0	0	0	Gm13278
chr4:88439645-88441201	0	0	0.03	0	0	0.01	Gm13275
chr4:88442645-88444107	0	0	0	0	0	0.22	Gm13278
chr4:88445478-88447034	0	0	0	0	0	0	Gm13275
chr4:88446223-88446772	0	0	0.08	0	0	0.01	Gm13285
chr4:88449157-88449706	0	0	0	0	0	0	Gm13285
chr4:88451929-88452897	0	0	0	0	0	0	Gm13289
chr5:145803858-145806547	0	0	0.57	0	0.59	0.26	1700018F24Rik
chr5:152445398-152453783	0	0	0	0	0	0	Rfc3
chr5:94731543-94735821	0	0	0.46	0	0.56	0.63	A430089I19Rik
chr5:94955308-94967392	0	0	0.26	0	0.56	0.59	Gm3139
chr5:95380098-95384376	0	0	0.58	0	0.49	0.59	A430089I19Rik
chr6:128902370-128925047	0	0	0.12	0	0.12	0.21	Gm15987
chr6:129963050-129976972	0	0	0	0	0	0	Klra6
chr6:129963051-129976978	0	0	0	0	0	0	Klra19
chr6:129993749-130017276	0	0	0	0	0	0	Klra18
chr6:129994034-130017289	0	0	0	0	0	0	Klra4
chr6:129994056-130015320	0	0	0	0	0	0	Klra33
chr6:130219211-130231946	0	0	0	0	0	0	Klra10
chr6:130273304-130287644	0	0	0	0	0	0	Klra3
chr6:132261607-132264761	0	0	0	0	0	0	Prpmp5
chr6:136778451-136783971	0	0	0.95	0	0.92	0.93	C030030A07Rik
chr6:43065742-43066675	0	0	0	0	0	0	Olfr441
chr7:10034292-10041283	0	0	0.31	0	0.66	0.84	2810047C21Rik1
chr7:10402130-10426674	0	0	0.15	0	0.32	0.59	Vmn2r47
chr7:110698881-110704018	0	0	0.75	0	0.87	0.71	Olfr613
chr7:111000267-111001721	0	0	0.41	0	0.59	0.39	Hbb-y
chr7:111029819-111030755	0	0	0.09	0	0.19	0.05	Olfr66
chr7:111207169-111208114	0	0	0.33	0	0.5	0.14	Olfr643
chr7:113219244-113222662	0	0	0.1	0	0.81	0.48	Gm8979
chr7:113219245-113221378	0	0	0.09	0	0.77	0.54	Gm8989
chr7:114271865-114272996	0	0	0	0	0	0	Olfr715
chr7:115302431-115303385	0	0	0.35	0	0.4	0.31	Olfr485
chr7:12737812-12738754	0	0	0	0	0	0	Vmn1r78
chr7:12845107-12846028	0	0	0	0	0	0	Vmn1r81
chr7:13763067-13764018	0	0	0	0	0	0	Vmn1r88
chr7:14318854-14364986	0	0	0.54	0	0.08	0.03	Sult2a2
chr7:147760053-147760986	0	0	0.31	0	0.08	0.21	Olfr538
chr7:149489406-149490408	0	0	0	0	0.03	0	Krtap5-4
chr7:16481472-16485648	0	0	0.28	0	0.3	0.06	Crxos1
chr7:18761842-18767211	0	0	0.92	0	0.94	0.92	Igfl3
chr7:19232002-19242074	0	0	0.28	0	0.08	0.25	Psg21
chr7:21572303-21573227	0	0	0	0	0	0	Vmn1r113
chr7:21668216-21669140	0	0	0	0	0	0	Vmn1r117
chr7:23851551-23852475	0	0	0	0	0	0	Gm5725
chr7:23936779-23963780	0	0	0	0	0	0	Gm4541
chr7:27620357-27628283	0	0	0	0	0	0	Cyp2a5
chr7:27943676-27951821	0	0	0	0	0	0	Egln2
chr7:29618812-29626722	0	0	0	0	0	0	Lgals4
chr7:29619200-29626652	0	0	0	0	0	0	Lgals6
chr7:32497683-32498999	0	0	0.07	0	0	0.24	Scgb1b7
chr7:34522211-34524314	0	0	0.19	0	0.02	0.08	Scgb2b24
chr7:34528817-34530122	0	0	0.24	0	0.43	0.17	Scgb1b24
chr7:48242978-48250203	0	0	0	0	0	0	4930433I11Rik
chr7:49700831-49703450	0	0	0	0	0	0	4933421I07Rik
chr7:50072196-50122604	0	0	0.11	0	0	0.21	Gm2381
chr7:54441135-54444725	0	0	0.48	0	0.6	0.65	Mrgpra6
chr7:54844319-54856742	0	0	0.28	0	0.82	0.58	Mrgpra3
chr7:5562012-5562915	0	0	0	0	0	0	Vmn1r61
chr7:5835181-5836144	0	0	0.31	0	0.24	0.56	Vmn1r64
chr7:66938957-66939047	0	0	0	0	0	0	Snord116
chr7:8246254-8270798	0	0	0.16	0	0.38	0.63	Vmn2r47
chr7:9080031-9103001	0	0	0.49	0	0.7	0.78	Vmn2r38
chr7:9246438-9270107	0	0	0.14	0	0.81	0.61	Vmn2r40
chr7:93100376-93109992	0	0	0	0	0	0	Vmn2r74
chr7:93296551-93320234	0	0	0	0	0	0	Vmn2r75
chr7:9965778-9989425	0	0	0.13	0	0.81	0.54	Vmn2r41
chr8:22224120-22224964	0	0	0.44	0	0.53	0.33	Defa25
chr8:22331251-22332228	0	0	0.8	0	0.67	0.64	Defa23
chr8:22331251-22332229	0	0	0.8	0	0.67	0.64	Defa-rs7
chr8:22465566-22466699	0	0	0.01	0	0.08	0	Defa-rs1
chr8:22728639-22729444	0	0	0.69	0	0.68	0.59	Defa26
chr8:22776268-22777205	0	0	0.47	0	0.52	0.53	Gm15315
chr8:37279117-37312570	0	0	0	0	0.64	0.86	Lonrf1
chr8:96848210-96848281	0	0	0.06	0	0.29	0	Mir138-2
chr9:109334831-109351654	0	0	0.2	0	0.12	0.27	Fbxw16
chr9:109381088-109398368	0	0	0	0	0	0	Fbxw19
chr9:35492663-35494956	0	0	0.03	0	0.03	0.13	Gm17252
chr9:35548633-35549837	0	0	0.03	0	0.02	0	Gm17677
chr9:37580221-37581225	0	0	0.4	0	0.42	0.4	Olfr875
chr9:37854808-37855738	0	0	0.18	0	0.57	0.69	Olfr884
chr9:38185467-38186418	0	0	0.39	0	0.47	0.51	Olfr251
chr9:39201377-39202322	0	0	0.33	0	0.13	0.05	Olfr951
chr9:39233709-39234654	0	0	0.07	0	0.15	0.03	Olfr952
chr9:78023720-78026689	0	0	0.18	0	0.23	0.51	C920006O11Rik
chrX:10879557-10880047	0	0	0.59	0	0.48	0.58	Gm14474
chrX:10889059-10889553	0	0	0	0	0	0	Gm14484
chrX:144427535-144467717	0	0	0.28	0	0.11	0	Gm15080
chrX:144435111-144467717	0	0	0.28	0	0.1	0	Gm15093
chrX:146029143-146071164	0	0	0.25	0	0.04	0.25	Gm10439
chrX:146376197-146419525	0	0	0.1	0	0.08	0.1	Gm15091
chrX:25455339-25478167	0	0	0.43	0	0.12	0.47	Gm5168
chrX:27228255-27251095	0	0	0.52	0	0.59	0.39	Gm10147
chrX:27228255-27251127	0	0	0.52	0	0.59	0.39	Gm10230
chrX:27228255-27251155	0	0	0.52	0	0.59	0.39	Gm10486
chrX:27228259-27251124	0	0	0.52	0	0.59	0.39	Gm10058
chrX:27228272-27251155	0	0	0.52	0	0.59	0.39	Gm10096
chrX:27228274-27251124	0	0	0.52	0	0.59	0.39	Gm10488
chrX:27574931-27597811	0	0	0.46	0	0.52	0.34	Gm10147
chrX:27574931-27597843	0	0	0.46	0	0.52	0.34	Gm10230
chrX:27574931-27597871	0	0	0.46	0	0.52	0.34	Gm10486
chrX:27574935-27597840	0	0	0.46	0	0.52	0.34	Gm10058
chrX:27574948-27597871	0	0	0.46	0	0.52	0.34	Gm10096
chrX:29924763-29947648	0	0	0.51	0	0.55	0.35	Gm10147
chrX:29924763-29947680	0	0	0.51	0	0.55	0.35	Gm10230
chrX:29924763-29947708	0	0	0.51	0	0.55	0.36	Gm10486
chrX:29924767-29947677	0	0	0.51	0	0.55	0.35	Gm10058
chrX:29924780-29947708	0	0	0.51	0	0.55	0.36	Gm10096
chrX:32944181-32967071	0	0	0.27	0	0.31	0.22	Gm10096
chrX:32944181-32967088	0	0	0.27	0	0.31	0.22	Gm10486
chrX:32944209-32967088	0	0	0.27	0	0.31	0.22	Gm10230
chrX:32944212-32967069	0	0	0.27	0	0.31	0.22	Gm10488
chrX:32944212-32967084	0	0	0.27	0	0.31	0.22	Gm10058
chrX:32944241-32967088	0	0	0.27	0	0.31	0.22	Gm10147
chrX:34450828-34451980	0	0	0.35	0	0.24	0.4	Gm15008
chrX:34847000-34851785	0	0	0	0	0.02	0	Rhox4b
chrX:34985927-34990666	0	0	0.1	0	0.23	0.38	Rhox2f
chrX:35419651-35424865	0	0	0.79	0	0.78	0.79	Rhox10
chrX:64079129-64079210	0	0	0.07	0	0.28	0.19	Mir465c-1
chrX:70473644-70476134	0	0	0.41	0	0.43	0.47	F8a
