# Supplementary material for: Divergence patterns of genic copy number variation in natural populations of the house mouse (Mus musculus domesticus) reveal three conserved genes with major population-specific expansions
Source: Genome Res. 2015 Aug;25(8):1114–24. doi: 10.1101/gr.187187.114 (PMC4509996; doi:10.1101/gr.187187.114)
Supplement: Supplemental Material [file supp_gr.187187.114_Supp_Table_S8.xlsx]

## Sheet: ANOVA
Table S8. Genes with significant difference in variance (ANOVA) of copy number between populations
	p-adj (TukeyHSD)
Coordinates (mm9)	FRA:GER	FRA:IRA	IRA:GER	GeneSymbol
chr10:117726685-117732094	0	0.889529	0	Iltifb
chr11:3031852-3093466	0	0.990675	0	Sfi1
chr14:56560287-56563498	0	0	0.76487	Cma1
chr14:56568645-56571208	0	0	0.949234	Mcpt-ps1
chr2:150043834-150070610	1e-07	0.385558	1.2e-06	Zfp937
chr17:3064317-3084183	7e-07	0.293934	0	Pisd-ps2
chr3:113115366-113126970	1.7e-06	0	2.76e-05	Amy2a2
chr11:3024023-3031947	3.4e-06	0.187768	1e-07	Pisd-ps1
chr11:3024029-3031945	3.4e-06	0.188002	1e-07	Pisd-ps3
chr3:113117374-113126832	4.8e-06	0	1.24e-05	Amy2a5
chr19:40164168-40166823	1.79e-05	0.0066823	0	Cyp2c50
chr2:111289298-111290216	1.99e-05	3.17e-05	0.977169	Olfr1287
chr12:104680376-104681890	2.03e-05	1.23e-05	0.973011	Ifi27l2a
chr7:150822629-150835543	3.43e-05	0.001213	0.30048	Tnfrsf22
chr2:111260188-111261106	5.09e-05	4.43e-05	0.997996	Olfr1286
chr7:7416679-7432684	5.58e-05	0.59364	0.000561	Vmn2r32
chr3:113082754-113094367	6e-05	0	1.84e-05	Amy2a2
chr3:113147966-113159576	0.0001	0	3.17e-05	Amy2a2
chr3:113052095-113061617	0.0001313	0	4e-07	Amy2a5
chr17:30729806-30749604	0.0001496	0.454921	0.0026487	Glo1
chr3:113084762-113094229	0.0001636	0	7.7e-06	Amy2a5
chr17:30759385-30763850	0.0002243	0.634479	0.0019611	1700097N02Rik
chr14:44740831-44749036	0.0002368	7e-07	0.0387232	4930503E14Rik
chr17:30763880-31012209	0.0003255	0.491169	0.0049441	Dnahc8
chr3:113149974-113159438	0.000464	0	2.08e-05	Amy2a5
chr17:31038811-31073455	0.0004717	0.878458	0.0014881	Glp1r
chr14:7915538-7937971	0.0004979	0.326539	0.015091	Gm3696
chr13:61872939-61888642	0.0005306	4e-07	0	BC052688
chr7:9744079-9759858	0.0005592	0.238429	0.0264809	Vmn2r44
chr17:13397907-13399077	0.0006702	1e-07	0.0007953	Gm10512
chr4:61711268-61715151	0.0007679	1.99e-05	0.280465	Mup20
chr7:9866726-9882971	0.0007867	0.210278	0.0424166	Vmn2r43
chr14:44579490-44579934	0.0008472	1.8e-06	0.0343182	Ang6
chr5:146319532-146345599	0.0008612	0.297209	0.0288555	Cyp3a41a
chrX:5246184-5248144	0.0009401	0.224131	1.75e-05	Gm14374
chr2:122292318-122293533	0.0010007	0.163161	0.0707362	Bambi-ps1
chr7:66933880-66933970	0.0010279	1.8e-06	0.0287803	Snord116
chr2:10410742-10410829	0.0010308	0.002404	2e-07	Mir669p-1
chrX:52683411-52700069	0.001305	0.134513	0.108344	Gm14625
chr8:22455224-22456066	0.0016165	0.325523	0.044468	Gm15299
chr7:108727373-108729675	0.0016634	0.26153	0.0614437	Art2b
chrX:10876382-10876883	0.001733	0.96805	0.0009771	Gm14483
chr4:61176624-61180518	0.0017446	0.987059	0.0012141	Mup16
chr7:7336695-7352338	0.0021018	0.76794	0.0004059	Vmn2r31
chr9:3038668-3038743	0.0022191	0.951221	0.0010904	Mir101c
chr14:52383566-52393265	0.0023044	0.0401172	0.427714	Ang4
chr14:44500562-44501033	0.0024092	1.4e-06	0.0098713	Ear10
chr4:145207048-145214297	0.0025605	0	4.3e-05	Gm13212
chr4:60885338-60889318	0.0025753	0.0014264	3e-07	Mup13
chr7:67011675-67011765	0.0027406	0.962199	0.0050765	Snord116
chrX:10876446-10876764	0.0029205	0.893761	0.0010064	Gm14475
chr13:22817552-22818491	0.003049	0.800395	0.0132365	Vmn1r207-ps
chr14:8244986-8255199	0.0032266	0.294752	8.7e-05	4933406F09Rik
chr4:60149719-60152729	0.0034332	0.312848	0.0001017	Mup2
chr5:146505623-146531712	0.0034973	0.373744	0.0710035	Cyp3a41a
chr4:60591132-60595027	0.0035653	0.700355	0.0005278	Mup10
chr11:49283555-49284683	0.0043032	0.332119	0.0993716	Olfr1386
chr14:59895749-59916359	0.0043484	0.502276	0.0536593	Phf11
chr9:109225399-109242173	0.0043727	0.0018748	0.930559	Fbxw28
chr2:122310676-122353776	0.0046167	0.0302392	0.684314	Gm14085
chr9:109225751-109242173	0.0046613	0.0019545	0.92689	Fbxw28
chr7:38968805-38982584	0.0047561	0.999527	0.0044437	1600014C10Rik
chr14:4974180-4978876	0.0052155	0.784303	0.00109	Gm3264
chr7:38968235-38982584	0.0052641	0.998961	0.0047605	1600014C10Rik
chr4:60148804-60152729	0.0054613	0.352194	0.0001968	Mup2
chr13:113884034-113891189	0.0058186	0.0161503	0.894843	Gzma
chr14:8377664-8401080	0.0060028	2.05e-05	0.0596239	Gm3558
chr14:8156501-8164909	0.0078121	0.907709	0.0200608	Gm5797
chr6:128612402-128627392	0.0083722	0.0006713	0.537068	Clec2h
chr14:44534733-44540745	0.0084123	1.9e-06	0.0039604	Ang3
chr8:22812995-22814119	0.0084561	0.028324	0.850514	AY761184
chrX:52804772-52821634	0.0085868	0.928802	0.0036843	Gm16404
chr3:88172538-88173642	0.0089472	0.0536984	0.692282	Bglap-rs1
chr17:13414053-13420524	0.0090718	1.4e-06	0.0026423	Smok2a
chr17:13427736-13429320	0.010253	1.5e-06	0.0025922	Smok2b
chr9:19517272-19518202	0.0103659	0.0308542	1.72e-05	Olfr857
chr4:60961068-60965030	0.0110719	0.0009248	7e-07	Mup14
chr6:67515227-67515693	0.0117211	0.0001838	0.201434	4930515G16Rik
chr4:60079340-60152730	0.01321	0.902677	0.0049271	Mup15
chr5:96221657-96233254	0.0136348	0.998906	0.0150617	Gm3286
chrX:32129796-32131700	0.0167433	0.15234	0.0001823	Mgclh
chr17:35607033-35611508	0.0167548	6.35e-05	0.0647646	H2-Q10
chr16:59215510-59216437	0.0171949	0.673424	0.0024181	Olfr199
chr3:88187748-88188386	0.0173758	0.9995	0.0162537	Bglap
chr11:48798830-48805748	0.0175483	0.0976142	0.0001087	Tgtp1
chr11:48798830-48805756	0.0176309	0.0977171	0.0001094	Tgtp2
chr2:177249446-177263899	0.0212964	7.79e-05	0.0620985	Gm14420
chrX:34794872-34798793	0.0218331	0.572601	0.0021194	Rhox3e
chr1:85242918-85267141	0.023429	0.0020445	0.543757	C130026I21Rik
chr17:22738114-22756100	0.0278033	0.000903	0.314075	Vmn2r112
chr8:22675857-22676816	0.0285826	0.683578	0.0043313	LOC100862126
chr8:22675857-22676822	0.0289228	0.683077	0.0043787	Gm14850
chr2:175788488-175800169	0.0299978	0.0001323	0.0712939	Gm14440
chr17:18222020-18273607	0.0317337	0.0038364	6.8e-06	Vmn2r91
chr13:33415945-33427235	0.0378617	0	0	Serpinb9f
chr2:175100625-175112306	0.0427884	0.0001286	0.0495587	Gm14440
chr4:61252962-61256864	0.0489197	0.246778	0.0011702	Mup17
chr7:114958099-114959020	0.0533558	0.0102541	0.7302	Olfr467
chr2:175791443-175800170	0.0567568	2.19e-05	0.0067796	Gm14288
chr2:175100624-175109351	0.0579745	2.58e-05	0.0078208	Gm14288
chr2:177631867-177662555	0.0579857	0.0007406	0.15533	Gm14327
chr17:39777901-39782612	0.0589531	0.646301	0.0083682	Gm9041
chrX:3907055-3908959	0.0672907	0.0085879	3.35e-05	Mgclh
chrX:3907038-3908959	0.0682257	0.0084994	3.37e-05	Mgclh
chrX:3907010-3908970	0.0699194	0.0083034	3.39e-05	Gm14347
chr4:60432031-60434824	0.0726864	0.141068	0.000851	Mup9
chrX:30245481-30247441	0.0732773	0.0050877	2.2e-05	Gm10921
chrX:30291071-30293031	0.0734073	0.0012435	5.8e-06	Gm10921
chrX:30291080-30293031	0.0736523	0.0012417	5.8e-06	Gm14351
chrX:30291082-30292986	0.0752826	0.0012013	5.7e-06	Mgclh
chrX:3410667-3412618	0.0756977	0.0091459	4.1e-05	Gm14351
chrX:30291082-30293003	0.0757036	0.0012094	5.8e-06	Mgclh
chr17:36245974-36248621	0.0759643	0.0064466	0.500336	C920025E04Rik
chrX:3410667-3412627	0.0761833	0.0091128	4.11e-05	Gm14345
chr5:11749832-11769308	0.0764339	0.0009023	4.5e-06	1700003C15Rik
chrX:30732633-30734583	0.0806977	0.0007587	4.1e-06	Gm2799
chrX:30732633-30734588	0.0808539	0.0007558	4e-06	Gmcl1l
chrX:30732661-30734582	0.0859092	0.0008121	4.6e-06	Mgclh
chrX:30732678-30734582	0.089366	0.000848	5e-06	Mgclh
chrX:3461360-3463320	0.0925999	0.0010006	6.1e-06	Gm14345
chrX:3461369-3463320	0.0928969	0.0010031	6.2e-06	Gm14351
chrX:3242047-3243544	0.0929347	0.000243	1.7e-06	Gm3750
chrX:3748108-3750057	0.0935672	0.0003523	2.4e-06	Gm3706
chrX:3461371-3463292	0.0969674	0.001029	6.6e-06	Mgclh
chrX:4074963-4076923	0.0983367	0.00115	7.5e-06	Gm10921
chrX:3461371-3463275	0.099543	0.0010456	6.9e-06	Mgclh
chrX:4446526-4448017	0.110209	0.0002166	1.8e-06	Gm3750
chrX:3748193-3749684	0.11109	0.0003291	2.7e-06	Gm3750
chr4:60732253-60736153	0.11483	0.276942	0.0038694	Mup12
chrX:3241680-3243601	0.114847	0.0002483	2.2e-06	Mgclh
chrX:3241680-3243584	0.115778	0.0002459	2.2e-06	Mgclh
chrX:3241678-3243629	0.117643	0.0002525	2.3e-06	Gm14351
chrX:3241674-3243629	0.11785	0.0002546	2.3e-06	Gm3706
chrX:3241669-3243629	0.118107	0.0002572	2.3e-06	Gm14345
chrX:30598310-30600259	0.118501	0.0001537	1.5e-06	Gm2799
chrX:4446441-4448390	0.12083	0.0002157	2e-06	Gm3706
chrX:31349046-31350997	0.121498	0.0154435	0.0001248	Gm2863
chr4:145054112-145057864	0.122294	3.04e-05	0.0037938	Smarca5-ps
chrX:31750733-31752434	0.13883	0.011715	0.0001111	Gm2933
chr8:107391323-107397982	0.140076	1.9e-06	0.0001683	Ces2d-ps
chrX:31750515-31752466	0.149308	0.0086958	8.99e-05	Gm14351
chr8:19933241-19958780	0.149551	0.0004227	0.0371141	Gm15319
chrX:31750506-31752466	0.150219	0.0086661	9.04e-05	Gm2913
chr7:20707004-20707928	0.151881	0.0014928	0.106143	Gm16442
chrX:30977837-30979741	0.159833	0.0006052	7.4e-06	Mgclh
chrX:30977820-30979741	0.160449	0.0006166	7.5e-06	Mgclh
chrX:30977792-30979742	0.162777	0.0006386	7.9e-06	Gm2825
chr2:177563695-177575023	0.165	0.0008684	0.0619535	Gm14325
chr4:147128082-147183897	0.168318	0.0003257	0.0253705	Gm13157
chr11:73600441-73601377	0.169307	0.0006994	9.1e-06	Olfr390
chr14:57633970-57637819	0.171634	1.94e-05	0.001526	B020004C17Rik
chr14:44396430-44397304	0.171656	0.0005658	0.0407566	Ear1
chr4:60510884-60514832	0.1757	0.117878	0.0020753	Mup1
chr7:22902340-22903264	0.178154	0.0069571	0.280149	Gm16442
chr8:28406516-28407672	0.190094	0.103196	0.0019569	Gm9731
chr17:13547437-13570089	0.198059	0.0005409	0.0327773	Tcp10c
chr7:11746991-11751497	0.201629	0.0002344	0.0147692	Zscan4d
chr8:19981359-20020392	0.205028	0.00083	0.0458976	2610005L07Rik
chr8:19991155-20020278	0.210392	0.0010072	0.0525984	6820431F20Rik
chr4:146064712-146094024	0.211261	0.002465	0.11018	Gm13051
chr4:60511805-60514832	0.224507	0.0948975	0.0022344	Mup1
chrX:31875768-31877469	0.227192	0.0037763	6.9e-05	Gm2933
chr8:19729575-19753602	0.232801	0.0018992	0.0795113	4930467E23Rik
chr8:19729575-19753527	0.233254	0.0019281	0.0803219	LOC100861668
chr17:38776391-38782598	0.247474	0.0036786	0.126087	Gm20516
chrX:3665486-3667437	0.249844	0.000997	2.16e-05	Gm14351
chrX:3665477-3667437	0.249936	0.0009902	2.15e-05	Gm14346
chr4:42535970-42541769	0.252061	2.04e-05	0.0009278	Gm13298
chr2:177282930-177297016	0.255838	6.06e-05	0.0027796	Gm14403
chr8:19863863-19893010	0.265372	0.0008016	0.0317228	6820431F20Rik
chr3:93629941-93631039	0.267298	0.0050422	0.147314	Tdpoz3
chrX:31060181-31060959	0.285177	0.0453219	0.0013374	Gm2837
chr4:145260599-145294340	0.294971	1.04e-05	0.0003578	Gm13242
chrX:3993613-3995573	0.305651	0.0010829	3.16e-05	Gm10922
chrX:8640215-8640948	0.30947	0.035337	0.0011499	Gm5635
chr4:42349016-42349771	0.319535	0.0056701	0.130283	Ccl27b
chr13:33753273-33763454	0.340529	0	0	Serpinb6d
chr17:13244186-13245146	0.381767	0.0001293	0.0031394	Gpr31b
chr4:61439361-61443258	0.387154	0.106647	0.0060584	Mup19
chr7:110880441-110881392	0.402272	5e-07	9e-06	Olfr628
chr2:177493992-177507980	0.402278	0.0013504	0.0273717	Gm14322
chrX:4598165-4600108	0.418662	0.0023657	0.0001147	Gm3763
chr17:38691136-38697566	0.454067	0.0036749	0.000207	Gm20410
chr2:89457324-89458402	0.483944	0.0079722	0.0959576	Olfr1248
chr2:177757988-177767215	0.49943	6.2e-05	0.000905	Etohi1
chr2:175019779-175032425	0.530826	0.0023313	0.027704	Gm14391
chr2:175018480-175032418	0.532987	0.0027444	0.0319088	Gm6710
chr2:175010665-175032425	0.540611	0.0041935	0.0455103	Gm14391
chr7:11379589-11384414	0.541915	2.04e-05	0.0002426	Zscan4a
chr7:67021820-67021910	0.546516	0.0013255	0.0154692	Snord116
chr7:11591093-11595896	0.553272	0.0067647	0.0005741	Zscan4c
chr4:146034924-146036119	0.566337	0.0012782	0.0138928	Gm13034
chr2:175868376-175882314	0.567555	0.0036278	0.0363993	Gm6710
chr4:41836783-41842582	0.582434	3.32e-05	0.0003438	Gm13298
chr5:15028949-15033007	0.583399	0.0047261	0.0437396	Gm17019
chr2:175868369-175881015	0.59044	0.0031881	0.0298753	Gm14391
chr2:177757988-177770564	0.600984	0.0001958	0.0019464	Etohi1
chr7:11891726-11896031	0.657167	0.0077843	0.0009916	Zscan4e
chr7:11983263-11987667	0.682597	0.0290135	0.0043855	Zscan4f
chr19:12975338-12976268	0.69688	8e-07	4.6e-06	Olfr1447
chr5:138667131-138693103	0.697645	0.0084303	0.0499899	Nxpe5
chr7:20686506-20687430	0.740798	0.0003131	0.0018108	Vmn1r91
chr6:128829478-128841142	0.752889	0.0012345	0.0066824	BC035044
chr3:106004408-106022397	0.772054	0.0024809	0.0004877	Chi3l4
chr9:88490162-88494081	0.77297	0.0199614	0.0041891	9430037G07Rik
chr10:99808605-99809515	0.784853	0.0105488	0.0450932	Gm4303
chr4:41774206-41775337	0.814249	0.0010725	0.0045266	Ccl21c
chr7:149459668-149460268	0.842234	0.0047462	0.0012761	Gm4559
chr5:14933630-14938475	0.849992	0.0055795	0.0191416	Speer4e
chr4:41812375-41813375	0.875689	0.0001071	0.0003398	LOC100041579
chr1:90123594-90158864	0.88214	0.0014879	0.0045632	Heatr7b1
chr4:41812375-41813410	0.884778	0.0001239	0.0003758	Gm13308
chr7:7503677-7519497	0.890145	0.0015775	0.0046395	Vmn2r33
chr1:90159687-90165983	0.893872	0.006118	0.0170324	6430706D22Rik
chr7:24487360-24488302	0.900431	0.0072795	0.0194686	Vmn1r173
chr12:22990696-23046943	0.914503	1.66e-05	4.16e-05	2410018L13Rik
chr12:20810252-20821640	0.92576	0.000458	0.0001895	1700030C10Rik
chr3:93455463-93456608	0.952654	0.0120276	0.0232246	Tdpoz2
chr1:90155430-90174154	0.962723	0.0103978	0.0187081	Hjurp
chr6:60229036-60353701	0.963723	0.0036556	0.0066611	A530053G22Rik
chr7:111448410-111464009	0.966369	0.0181135	0.0103695	Trim12a
chr15:63722819-63743852	0.967117	6e-06	1.03e-05	Gsdmc4
chr1:90161402-90174132	0.977294	0.0132228	0.0207959	A730008H23Rik
chr7:110665924-110666896	0.984776	2.3e-06	3.3e-06	Olfr611
chr16:59361124-59362042	0.989513	0.0169391	0.0229555	Olfr207
chr15:75258035-75262259	0.992194	0	0	9030619P08Rik
chr15:77355296-77363745	0.998176	0.0089388	0.0078389	Apol7c
